# Supplementary material for: Transcriptional landscape of human microglia reveals robust gene expression signatures that implicates age, sex and APOE-related immunometabolic pathway perturbations
Source: Research Square preprint supplement (doi:10.21203/rs.3.rs-523348/v1), 2021-06-07
Supplement: Supplementary file 1 [file 9c053ae33eb2dd203dc5dd7c.pdf]

# Supplementary Figures

|           |                                                                                                 |
|-----------|-------------------------------------------------------------------------------------------------|
| Figure S1 | Surgical approaches for excision of non-affected brain tissue.                                  |
| Figure S2 | Validations of sorted cells indicate pure microglial population.                                |
| Figure S3 | Correlation of our microglial signature vs bulk surgical tissue.                                |
| Figure S4 | Co-expression networks of WGCNA modules significantly associated with age, sex or <i>APOE</i> . |
| Figure S5 | Expression of established microglial marker genes in single cell data.                          |
| Figure S6 | Heatmap of top cluster marker genes across single cell clusters.                                |
| Figure S7 | Hypergeometric overlap of module genes across all single cell clusters.                         |

# Supplementary Figure S1

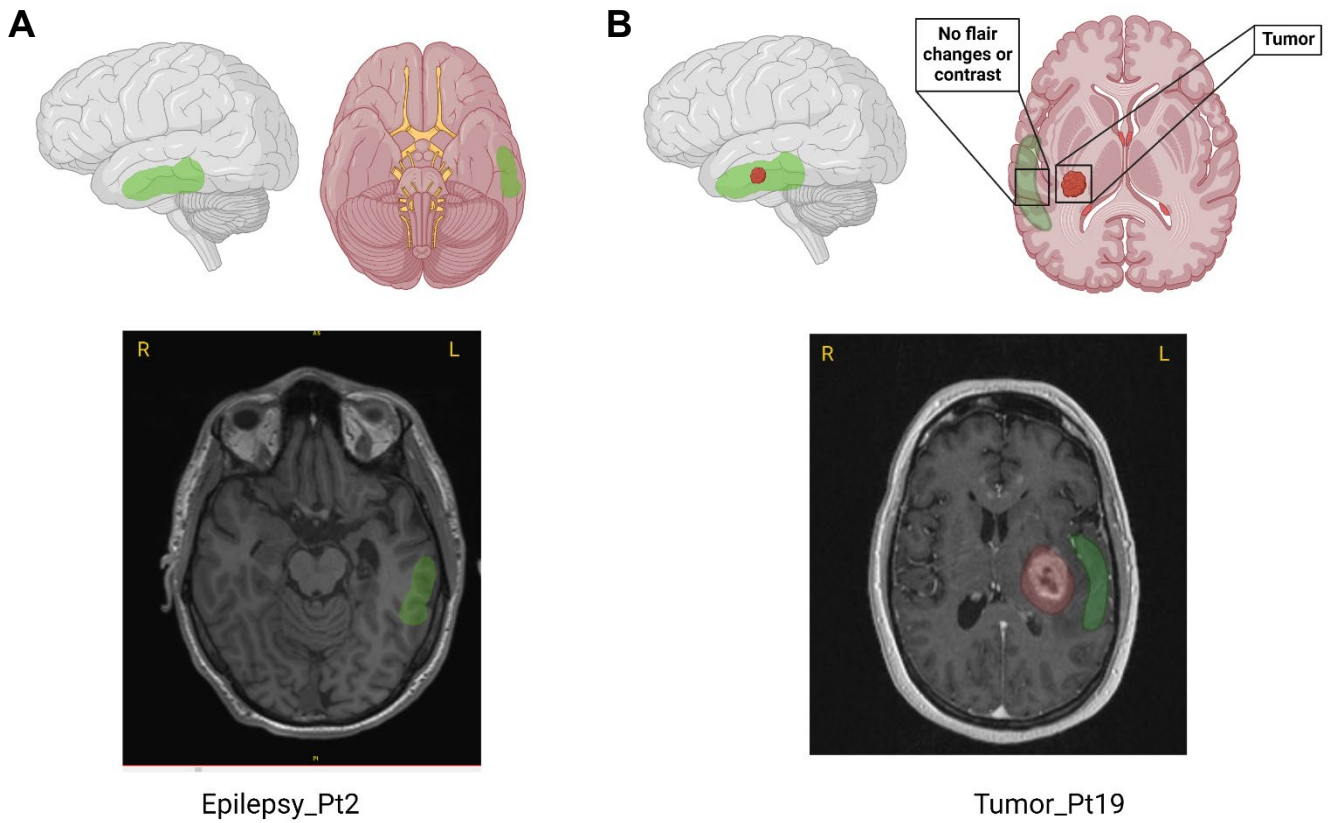

**Figure S1. Surgical approaches for excision of non-affected brain tissue.** (A) 3-D model and axial T1 MRI image highlighting general areas where normal tissue was obtained in epilepsy cases (green). (B) 3-D model and axial T1 MRI image highlighting the area for normal tissue removal in patients with oncologic resections (green) [Created with BioRender.com].

# Supplementary Figure S2

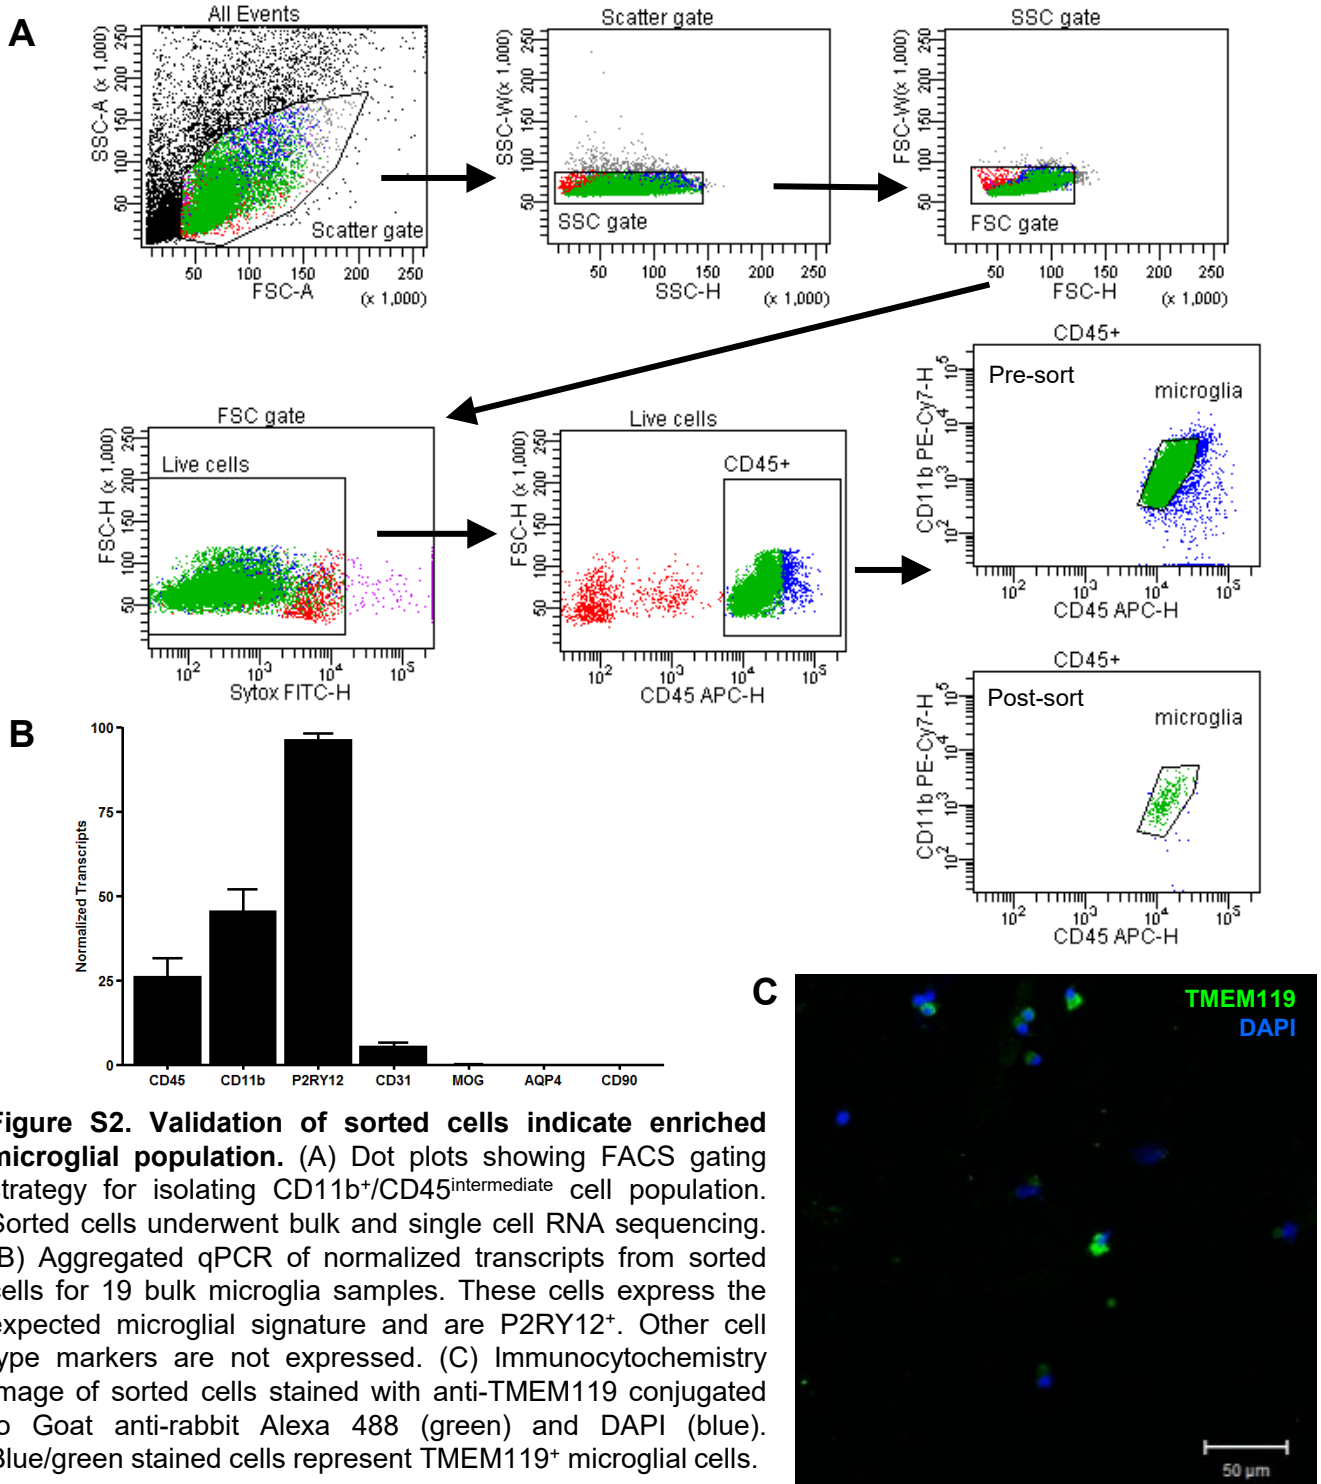

**Figure S2. Validation of sorted cells indicate enriched microglial population.** (A) Dot plots showing FACS gating strategy for isolating CD11b<sup>+</sup>/CD45<sup>intermediate</sup> cell population. Sorted cells underwent bulk and single cell RNA sequencing. (B) Aggregated qPCR of normalized transcripts from sorted cells for 19 bulk microglia samples. These cells express the expected microglial signature and are P2RY12<sup>+</sup>. Other cell type markers are not expressed. (C) Immunocytochemistry image of sorted cells stained with anti-TMEM119 conjugated to Goat anti-rabbit Alexa 488 (green) and DAPI (blue). Blue/green stained cells represent TMEM119<sup>+</sup> microglial cells.

# Supplementary Figure S3

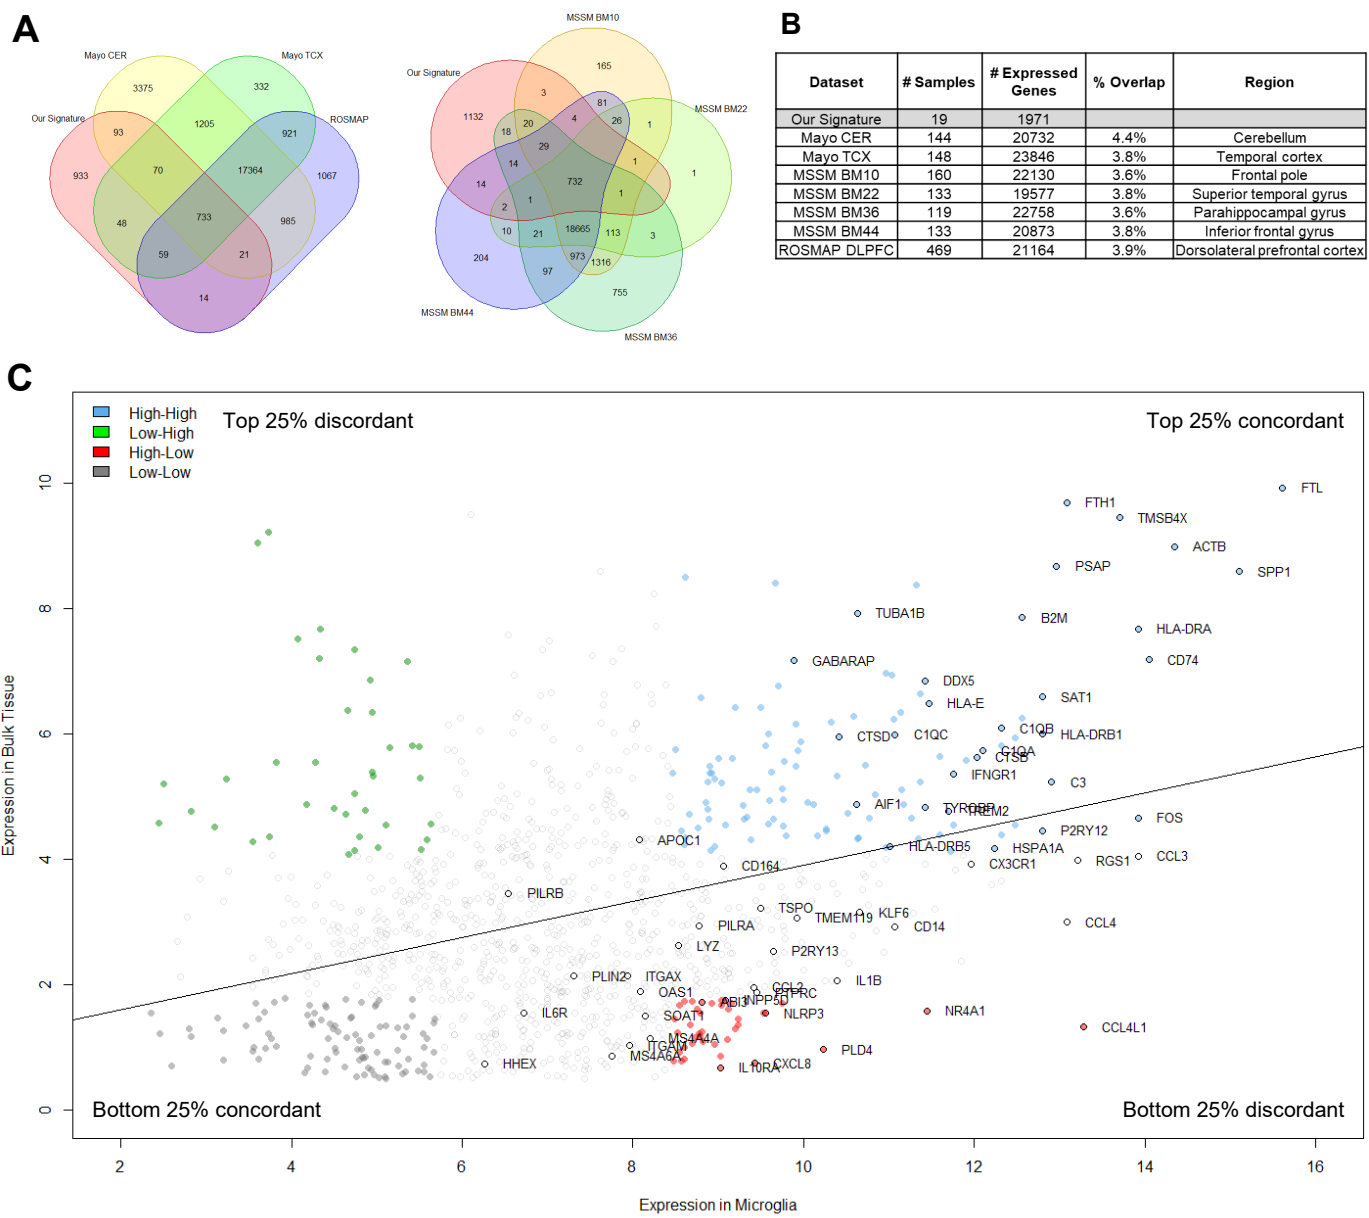

**Figure S3. Correlation of our microglial signature vs bulk surgical tissue.** (A) Venn diagrams showing the number of overlapping genes between our microglial signature and the 7 AMP-AD brain regions. (B) Total number of genes expressed per region and % bulk genes representing the microglial signature (overlap). (C) Scatter plot showing correlation of expression in CQN values for our microglial signature genes in bulk microglia vs. bulk surgical fresh brain tissue. Concordant and discordant genes in the highest and lowest expression quadrants are highlighted in blue (high-high), green (low-high), red (high-low) and gray (low-low). Select genes are annotated (o).

# Supplementary Figure S4

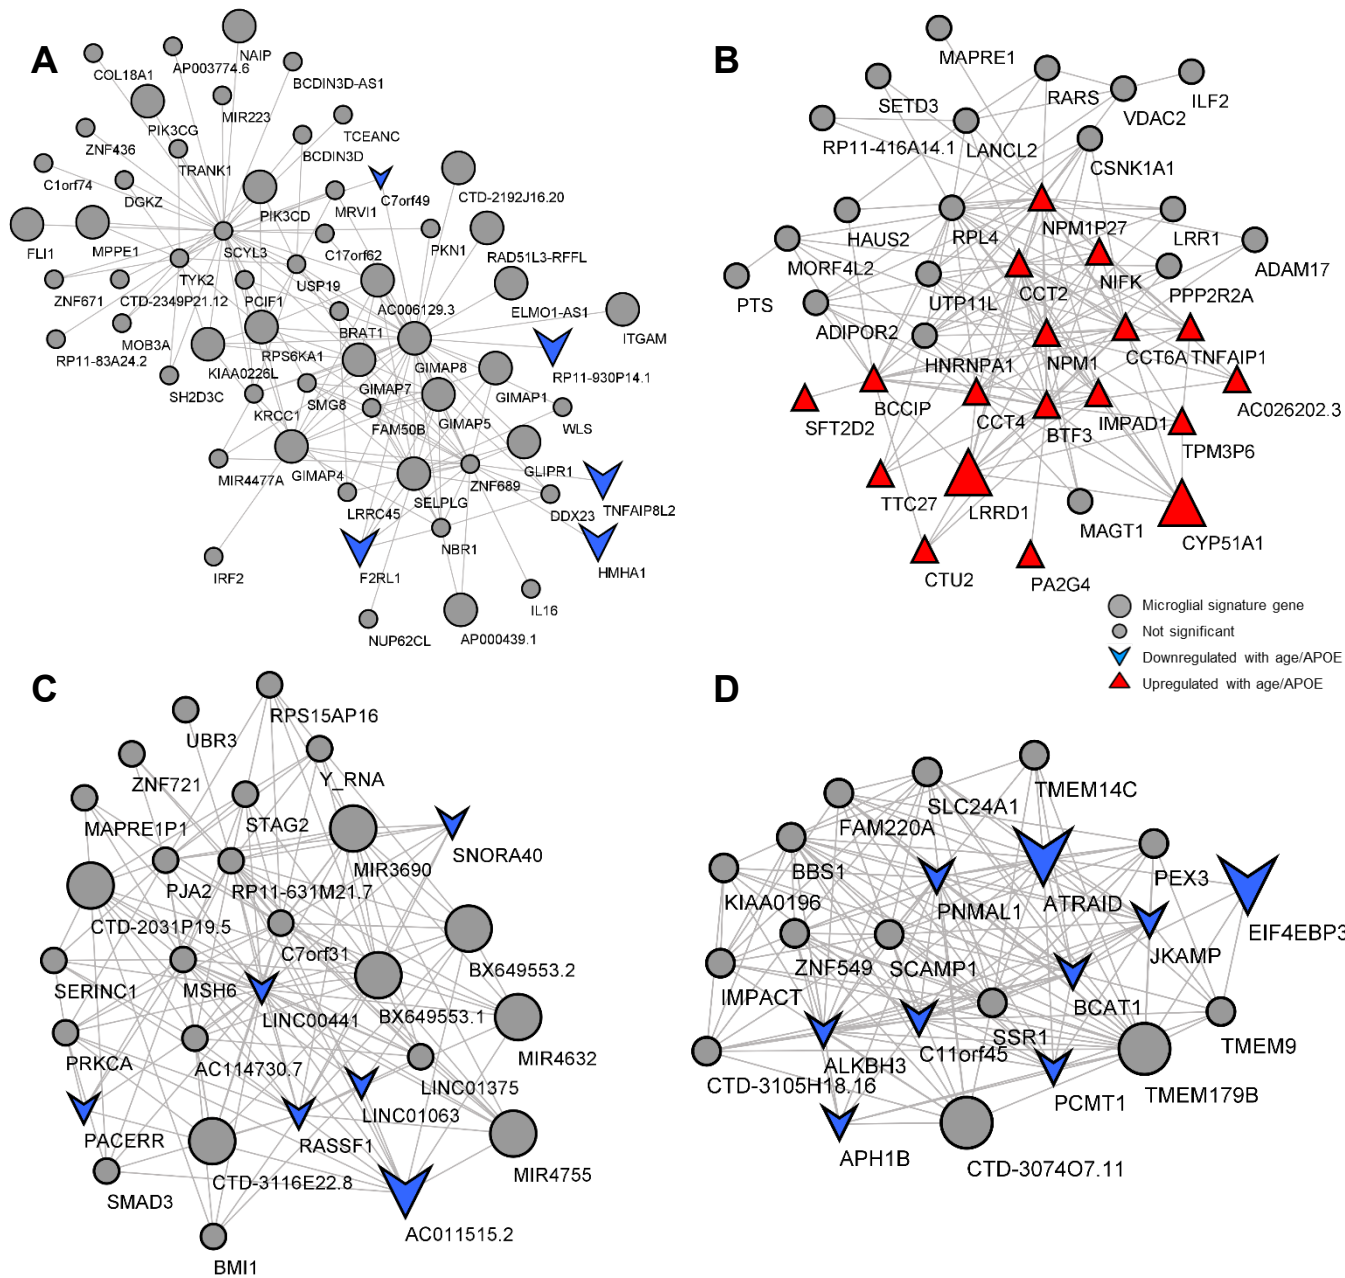

**Figure S4. Co-expression networks of WGCNA modules significantly associated with age, sex or *APOE*.** Genes with module membership > 0.7 are shown here with microglial signature genes denoted with larger circles, upregulated genes with age or *APOE* shown as red triangles and downregulated genes shown as as blue inverted arrows. (A) Module 4 co-expression network which was significantly downregulated in *APOE*  $\epsilon 4$  carriers. (B) Module 28 gene co-expression network was upregulated in *APOE*  $\epsilon 4$  carriers. (C) Module 34 gene co-expression network was downregulated in *APOE*  $\epsilon 4$  carriers. (D) Module 36 gene co-expression network was downregulated in *APOE*  $\epsilon 4$  carriers.

# Supplementary Figure S5

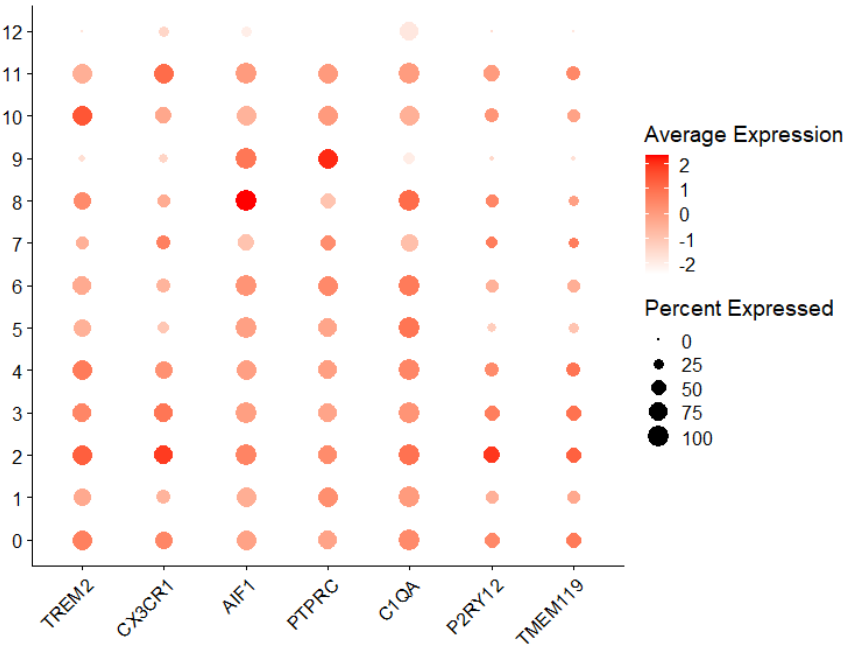

**Figure S5. Expression of established microglial marker genes in single cell data.** Dot plot showing expression of established microglial marker genes from the literature across all clusters.

# Supplementary Figure S6

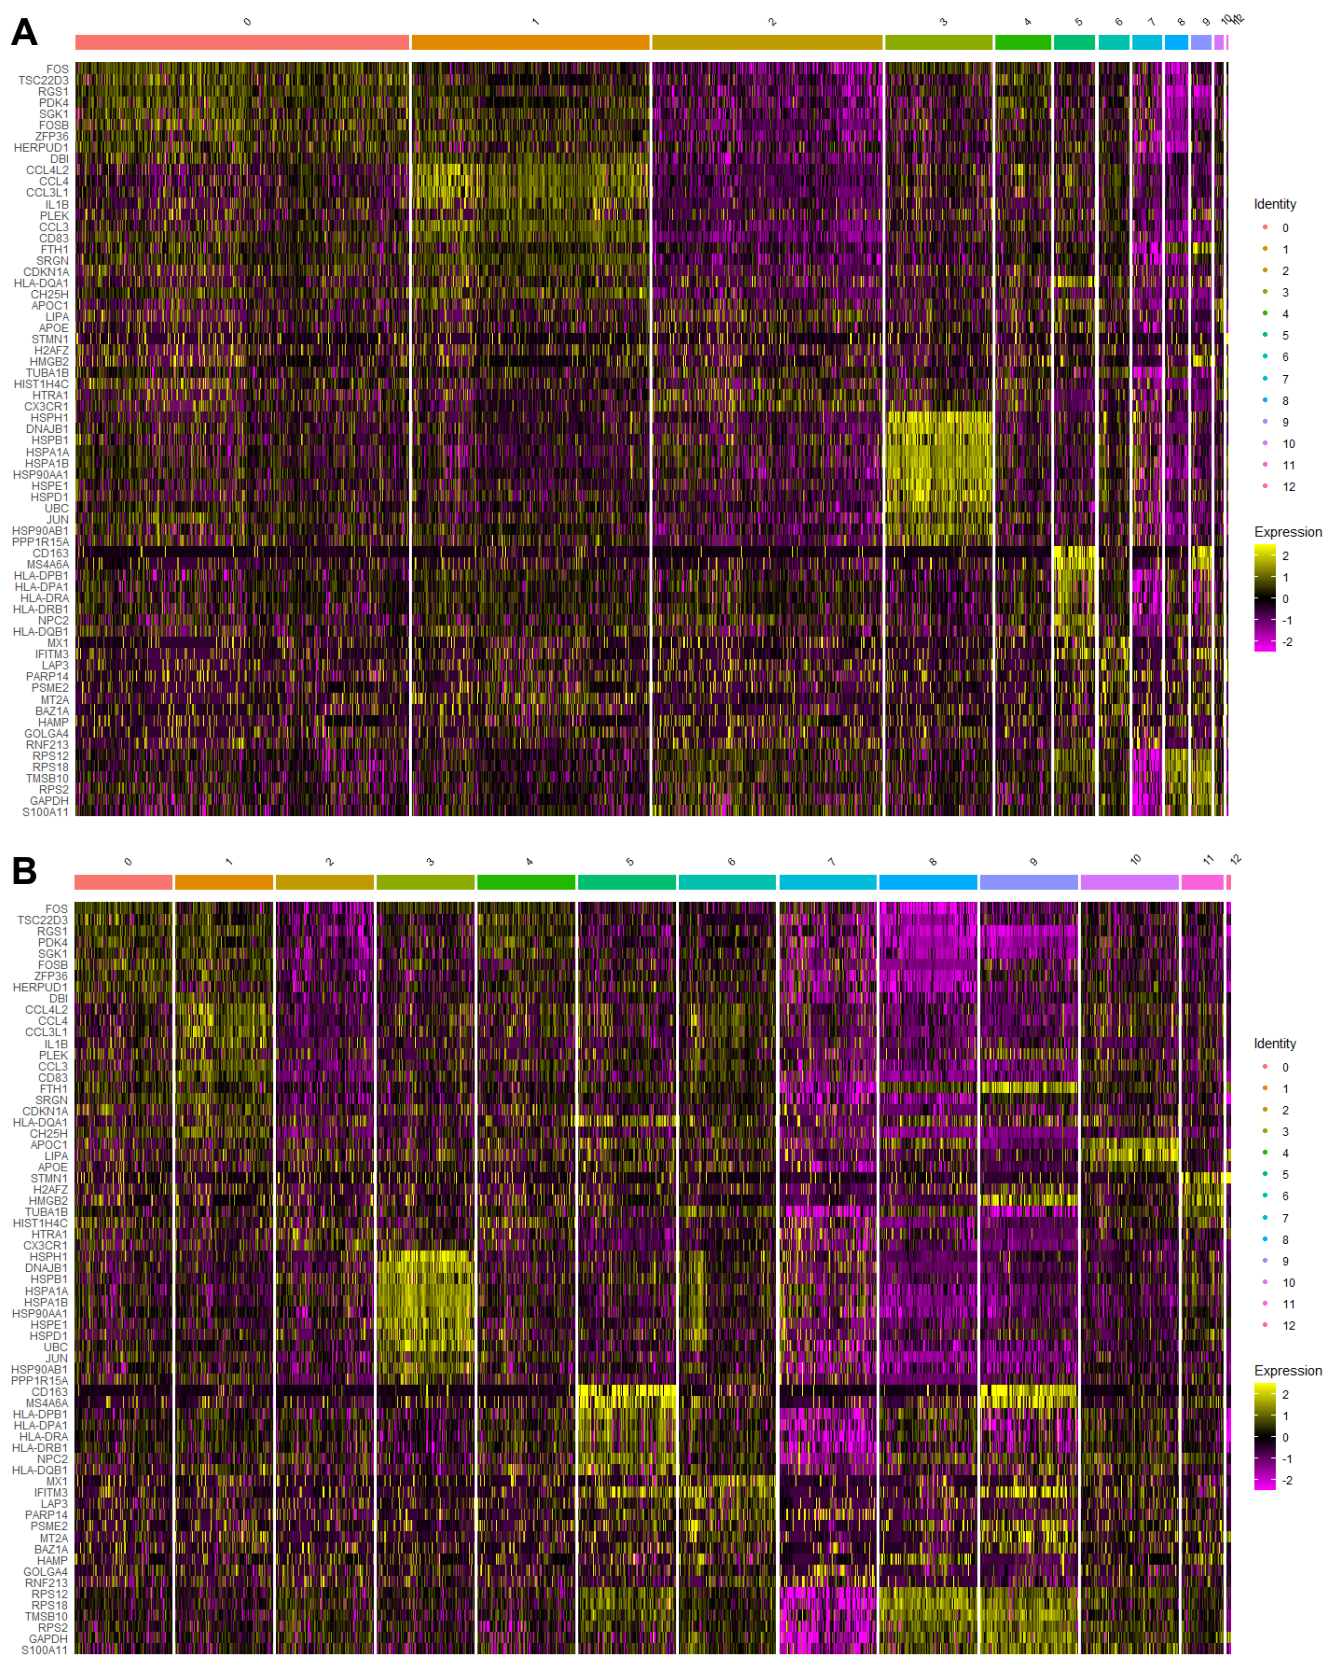

**Figure S6. Expression of top cluster marker genes across single cell clusters.** (A) Heatmap showing expression of selected marker genes (log fold change < -0.1 or > 0.1; q<0.05) for myeloid clusters. (B) Same heatmap downsampled to 100 cells.



# Supplementary Figure S7

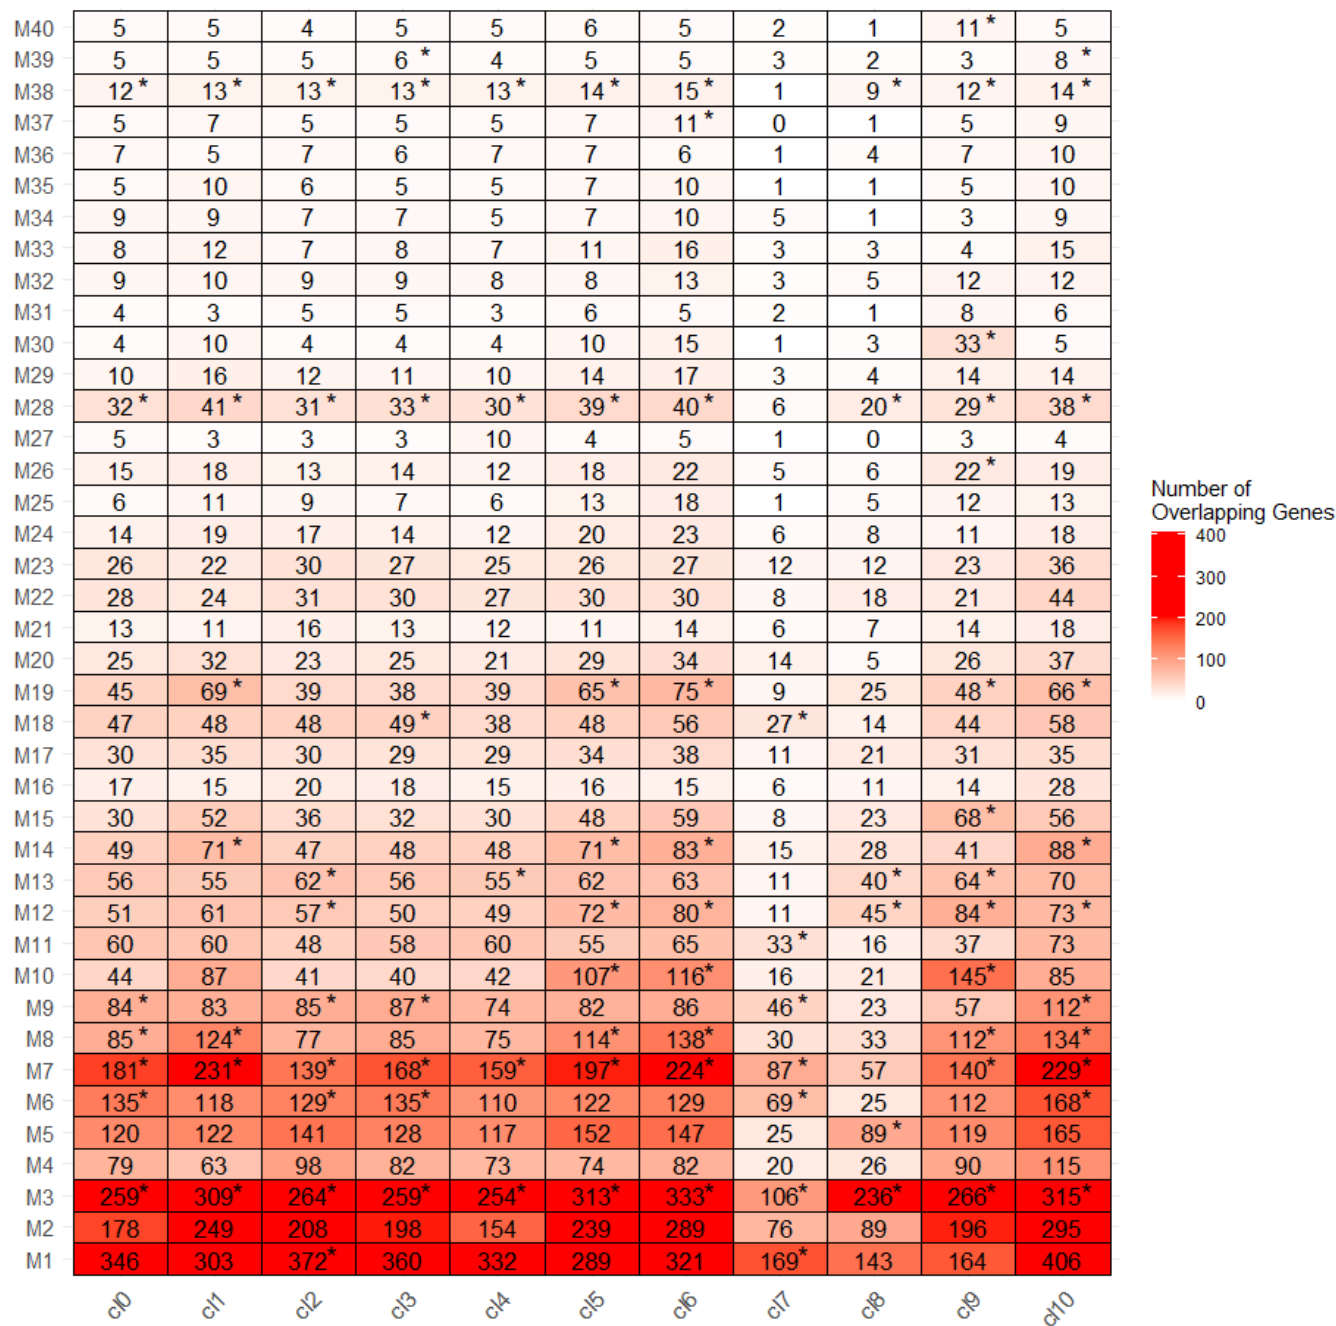

**Figure S7. Hypergeometric overlap of module genes across all single cell clusters.** Hypergeometric distribution of enrichment between module genes and clusters showing numbers of overlapping genes. \* represents module genes that were significantly enriched in the cluster ( $p < 0.05$ ).
