# Supplementary material for: Transcriptional landscape of human microglia reveals robust gene expression signatures that implicates age, sex and APOE-related immunometabolic pathway perturbations
Source: Research Square preprint supplement (doi:10.21203/rs.3.rs-523348/v1), 2021-06-07
Supplement: Supplementary file 2 [file bfa340bfeb131647300d82bd.xlsx]

## Sheet: README
Table	Description
Table S1	Demographics table of all samples included in the study and the associated demographics. Samples were either included for bulk microglial RNAseq, bulk tissue RNAseq, 10x Genomics single cell RNAseq or on multiple platforms.
Table S2	Core microglial signature genes and their fold change in the AMP-AD datasets. Includes unique genes only (n=1971).
Table S3	Core microglial signature genes and their average RPKM of control samples in the AMP-AD datasets and bulk microglia from surgical tissue in this study. Includes unique genes only (n=1971).
Table S4	List of microglial signature genes from this study (NET-sig, n=1,971) and those common to this study and prior three published studies by Galatro et al., Gosselin et al. and Olah et al. (Core_gene_set, n=350).
Table S5	Normalized expression values (CQN) of signature genes in bulk surgical tissue and bulk microglia with their concordant or discordant classification.
Table S6	Genes present in the seven modules significantly associated with age or APOE and their module membership.
Table S7	List of established marker genes from the literature used to annotate the clusters in the single cell data.
Table S8	Cell contributions to each cluster. Number and percentage of cells present in each cluster per sample and the cluster annotation based on established cell type markers from the literature.
Table S9	Expression levels of marker genes per cluster. Genes were filtered for those expressed in at least 70% of cells in the cluster and average log fold change > 0.6 and adjusted P < 0.05.

## Sheet: Table S1
Table S1. Demographics table of all samples included in the study and the associated demographics. Samples were either included for bulk microglial RNAseq, bulk tissue RNAseq, 10x Genomics single cell RNAseq or on multiple platforms. Samples 5 and 6 were from two brain regions of the same person.
ID	Age	Sex	Ethnicity	Brain Hemisphere	Brain Region	APOE Genotype	Diagnosis	Bulk Microglia	Bulk Tissue	Single Cell Microglia	Surgical Approach
1	37	F	Hispanic or Latino	Right	Cerebellum	33	Metastatic carcinoma	X			Right Craniotomy for tumor
2	25	M	White	Left	Mesial temporal lobe	23	Epilepsy	X			left anterior temporal lobectomy
3	34	M	White	Right	Temporal insular	33	Oligodendroglioma	X			Right awake temporal craniotomy for temporal insular glioma.
4	71	F	White	Right	Temporal lobe	33	Astrocytoma	X			Right temporal craniotomy for glioma.
5	27	M	Hispanic or Latino	Right	Mesial temporal cortex	33	Epilepsy	X		X	Temporal lobectomy, right sided
6					Anterior temporal cortex					X
7	55	M	White	Right	Temporal lobe	23	GBM	X			Right temporal craniotomy for high-grade glioma
8	62	F	White	Right	Temporal/occipital	34	GBM	X			Right temporal craniotomy for high-grade glioma
9	19	M	African American	Left	Temporal	33	DNET	X			Left temporal craniotomy for resection of mesiotemporal glioma with BrainPath retractor
10	62	F	White	Right	Temporal insular	33	GBM	X	X	X	Right temporal craniotomy for temporal insular high-grade glioma with 5-ALA
11	19	F	White	Right	Temporal	33	Oligodendroglioma	X			Right temporal craniotomy for parahippocampal/brainstem low-grade glioma.
12	65	F	White	Left	Temporal	33	Astrocytoma	X			Left temporal craniotomy for low-grade glioma.
13	35	F	Black or African American	Left	Temporal lobe	33	Epilepsy	X			Left Anterior Temporal Lobectomy
14	47	F	White	Right	Parietal cortex	34	GBM	X	X		Right parietal craniotomy for parieto-occipital high-grade glioma with brain path tubular retractor
15	63	F	White	Right	Temporal	34	Metastatic carcinoma	X	X	X	Right Temporal craniotomy for tumor resection (Right)
16	59	M	White	Right	Frontal	33	Oligodendroglioma	X			Right awake craniotomy with cortical and subcortical mapping for low-grade glioma
17	37	F	White	Left	Insula	24	Astrocytoma	X			Left awake craniotomy with cortical and subcortical mapping for insular glioma
18	66	M	Middle Eastern	Left	Frontal	33	GBM	X	X		Left frontal craniotomy for tumor resection (Left)
19	31	M	Hispanic or Latino	Right	Frontal	33	Oligodendroglioma	X		X	Right-sided awake Craniotomy with brain mapping and electrocorticography for tumor resection. (Right)
20	45	F	White	Left	Temporal	23	GBM	X			Left awake craniotomy with cortical and subcortical mapping for 2 hours for insular high-grade glioma.
21	66	F	White	Left	Temporal	33	Meningioma		X		Left temporal craniotomy for tentorial meningioma
22	67	M	White	Left	Frontal	34	Meningioma		X		Left pterional craniotomy for tumor resection,
23	37	F	White	Right	Frontal	33	Oligodendroglioma		X		Right awake craniotomy for perirolandic low-grade glioma
24	64	F	Hispanic or Latino	Left	Temporal	33	GBM		X		Left temporal craniotomy for high-grade glioma.
25	63	M	White	Left	Frontal		GBM		X		Left frontal craniotomy for opercular high-grade glioma.
26	27	M	White	Left	Temporal	33	Astrocytoma			X	Awake Left Craniotomy for tumor resection, Non IMRI (Left)

## Sheet: Table S2
Table S2. Core microglial signature genes and their fold change in the AMP-AD datasets. Includes unique genes only (n=1971).
Gene	Gene Name	Mayo CER			Mayo TCX			MSBB BM10			MSBB BM22			MSBB BM36			MSBB BM44			ROSMAP DLPFC
		Log2FC	p	q	Log2FC	p	q	Log2FC	p	q	Log2FC	p	q	Log2FC	p	q	Log2FC	p	q	Log2FC	p	q
ENSG00000001036	FUCA2	-3.52019	2.001e-53	2.1473e-52	-3.19736	3.61039e-48	3.08867e-47	-3.08312	1.06054e-53	1.35723e-52	-3.02606	1.37098e-37	1.24146e-36	-2.93833	8.24086e-42	8.45694e-41	-3.06898	1.73456e-41	1.67054e-40	-3.79866	9.19722e-108	8.72065e-107
ENSG00000001630	CYP51A1	-3.59999	5.82788e-49	4.71382e-48	-3.42002	3.59852e-47	2.88578e-46	-2.34583	1.04452e-30	3.33649e-30	-2.43743	4.80465e-25	1.70308e-24	-2.41044	1.85933e-28	7.01794e-28	-2.28024	1.85356e-25	5.79339e-25	-3.74889	1.18582e-111	1.22136e-110
ENSG00000002586	CD99	-5.97139	5.21931e-83	5.32899e-81	-5.97125	3.59805e-86	3.54521e-84	-5.97095	7.70833e-80	8.48519e-78	-5.97139	6.37335e-63	7.12703e-61	-5.97139	4.20924e-66	4.52734e-64	-5.97139	5.5442e-64	5.70203e-62	-5.9705	1.34301e-201	1.47836e-199
ENSG00000003056	M6PR	-3.50116	3.44235e-43	1.98538e-42	-3.28324	1.56089e-41	8.82895e-41	-2.68296	1.32098e-50	1.35364e-49	-2.73513	1.27565e-42	1.86645e-41	-2.63763	2.65222e-44	3.37577e-43	-2.65031	4.0512e-42	4.10657e-41	-4.12831	1.55121e-79	7.82827e-79
ENSG00000003400	CASP10	-2.36179	2.58926e-46	1.7848e-45	-2.15385	6.30452e-38	2.94239e-37	-2.15499	2.71248e-39	1.36838e-38	-2.03962	2.16712e-27	8.91004e-27	-2.01964	2.1397e-29	8.58195e-29	-2.08854	9.87774e-32	4.49394e-31	-2.24454	5.77934e-89	3.56372e-88
ENSG00000004799	PDK4	-6.34681	2.18277e-39	1.01973e-38	-4.8465	3.16728e-31	1.04857e-30	-5.03462	9.77901e-35	3.83913e-34	-4.77264	4.44558e-26	1.68337e-25	-4.62758	2.47464e-26	8.22737e-26	-4.78223	2.4735e-24	7.27136e-24	-6.11913	2.2213e-73	9.79291e-73
ENSG00000005020	SKAP2	-3.66068	9.77727e-50	8.31392e-49	-2.46604	1.7626e-35	7.26169e-35	-2.21125	5.17282e-41	2.88878e-40	-2.32928	1.74008e-33	1.10739e-32	-2.19854	4.53614e-34	2.50153e-33	-2.40876	1.36092e-37	9.52104e-37	-3.26552	2.89392e-87	1.72557e-86
ENSG00000005844	ITGAL	-3.54342	6.26579e-70	2.19069e-68	-3.4376	3.68052e-59	6.38652e-58	-3.44003	4.48213e-57	7.36051e-56	-3.32441	5.69521e-42	7.73078e-41	-3.36602	8.44434e-49	1.64793e-47	-3.28961	2.64626e-48	4.85492e-47	-3.53029	8.23813e-135	1.52731e-133
ENSG00000006327	TNFRSF12A	-3.09817	2.80376e-39	1.30423e-38	-3.00663	3.02566e-35	1.23213e-34	-3.11141	2.41523e-36	1.03217e-35	-2.87504	2.58728e-24	8.74426e-24	-3.04313	2.3412e-27	8.24071e-27	-2.87543	2.34684e-24	6.91054e-24	-2.75935	2.54511e-42	5.90396e-42
ENSG00000006747	SCIN	-5.89438	9.023e-55	1.04551e-53	-5.25836	7.07891e-39	3.45008e-38	-4.71187	1.59079e-39	8.12701e-39	-4.6196	2.22685e-28	9.81431e-28	-4.29942	5.42788e-28	1.9844e-27	-4.62252	2.14948e-30	8.99766e-30	-5.79125	4.20788e-101	3.41724e-100
ENSG00000007129	CEACAM21	-3.41104	2.92775e-50	2.57022e-49	-3.35751	8.48532e-49	7.51465e-48	-3.33247	5.94815e-42	3.46893e-41	-3.32588	4.01413e-35	2.91993e-34	-3.33354	6.24219e-38	4.58324e-37	-3.39681	2.61994e-38	1.92969e-37	-3.47874	1.97104e-116	2.282e-115
ENSG00000009790	TRAF3IP3	-3.10463	2.51112e-48	1.95912e-47	-3.1444	2.1018e-49	1.93432e-48	-2.79217	7.98532e-43	4.90467e-42	-2.76139	2.61363e-32	1.51798e-31	-2.66385	5.74236e-33	2.92833e-32	-2.88706	2.37982e-34	1.31034e-33	-3.30861	7.85931e-126	1.16812e-124
ENSG00000010327	STAB1	-3.52629	9.01874e-43	5.05868e-42	-2.81075	3.71517e-26	9.69924e-26	-2.84022	1.69274e-30	5.36935e-30	-2.44913	3.80475e-17	8.57606e-17	-2.72378	3.51328e-22	9.3014e-22	-2.37329	9.25081e-19	2.04205e-18	-3.09287	2.96968e-50	8.03741e-50
ENSG00000010610	CD4	-6.03976	9.57896e-65	2.16294e-63	-5.10442	3.05294e-49	2.7806e-48	-5.66303	1.2365e-63	3.44384e-62	-5.34008	2.77861e-47	6.62447e-46	-5.3752	2.38237e-52	6.68676e-51	-5.25011	5.34159e-50	1.16506e-48	-5.41172	1.95849e-127	3.03577e-126
ENSG00000010671	BTK	-4.24707	4.8828e-76	2.79669e-74	-3.82845	2.29219e-54	2.8734e-53	-3.78164	1.77687e-65	6.09151e-64	-3.69547	1.5816e-46	3.46575e-45	-3.59738	3.83992e-47	6.4257e-46	-3.79821	3.64611e-52	1.02338e-50	-4.13354	1.46556e-159	4.95198e-158
ENSG00000011052	NME2	-5.55498	8.62809e-80	6.71656e-78	-5.55498	7.78548e-83	5.92959e-81	-5.55498	9.60305e-77	8.15102e-75	-5.55498	1.88133e-60	1.61634e-58	-5.55498	1.63107e-63	1.34396e-61	-5.55498	1.79196e-61	1.44288e-59	-5.55498	5.73415e-194	4.69734e-192
ENSG00000011422	PLAUR	-5.26478	1.14021e-49	9.6664e-49	-5.04662	9.31497e-45	6.42113e-44	-5.17079	4.42483e-47	3.5831e-46	-5.00979	4.53878e-35	3.28799e-34	-5.13642	9.4703e-38	6.83239e-37	-4.98252	1.34329e-35	8.04715e-35	-4.75224	2.84771e-95	2.02647e-94
ENSG00000011600	TYROBP	-6.99779	3.41592e-64	7.40466e-63	-5.7255	3.1863e-46	2.41111e-45	-6.62294	1.11043e-66	4.28655e-65	-6.31962	7.5648e-45	1.37179e-43	-6.21148	4.40956e-48	8.01687e-47	-5.98961	1.85413e-52	5.39765e-51	-5.67398	4.41936e-87	2.62184e-86
ENSG00000012779	ALOX5	-3.157	2.92237e-39	1.35716e-38	-5.27834	3.72637e-52	4.08278e-51	-5.15457	5.01013e-60	1.02457e-58	-4.88114	3.75313e-43	5.74176e-42	-4.90551	4.55272e-46	6.87543e-45	-4.86354	1.05066e-44	1.37709e-43	-5.69484	2.82636e-126	4.24557e-125
ENSG00000015479	MATR3	-3.56222	1.02131e-56	1.34867e-55	-3.80472	9.10904e-62	1.8655e-60	-2.2181	2.38352e-29	7.22387e-29	-2.4829	4.65771e-27	1.87452e-26	-2.15346	2.8065e-24	8.33375e-24	-3.03019	4.43902e-31	1.94242e-30	-4.03272	3.47565e-141	7.58079e-140
ENSG00000018280	SLC11A1	-4.79071	2.92158e-49	2.41296e-48	-4.08354	4.07371e-29	1.22021e-28	-4.32527	1.46535e-39	7.49429e-39	-4.09168	2.48556e-28	1.09204e-27	-4.19905	1.43493e-30	6.1924e-30	-4.21406	2.0086e-30	8.4305e-30	-4.03236	1.71896e-55	5.16751e-55
ENSG00000019582	CD74	-7.46371	1.17751e-53	1.2782e-52	-6.15124	9.25896e-40	4.75779e-39	-7.34173	1.0082e-52	1.21001e-51	-6.6619	1.33076e-38	1.31582e-37	-6.76502	5.79355e-46	8.61997e-45	-5.91143	5.22028e-42	5.25009e-41	-6.38455	3.28263e-81	1.71559e-80
ENSG00000021355	SERPINB1	-2.97511	4.1565e-42	2.23702e-41	-2.82056	4.3502e-31	1.4301e-30	-2.84848	9.86662e-38	4.53871e-37	-2.71873	5.81144e-29	2.66374e-28	-2.67808	1.89535e-28	7.15007e-28	-2.70959	6.54914e-28	2.36912e-27	-3.27156	1.16755e-69	4.75381e-69
ENSG00000023892	DEF6	-3.79353	1.96378e-50	1.74242e-49	-3.31285	2.19553e-41	1.231e-40	-3.49269	6.41723e-44	4.20552e-43	-3.25996	6.26907e-32	3.52479e-31	-3.35513	5.3101e-35	3.13971e-34	-3.28799	9.14012e-34	4.84152e-33	-3.14191	1.82136e-82	9.75779e-82
ENSG00000025708	TYMP	-3.68356	4.58358e-42	2.46217e-41	-3.90289	3.26111e-32	1.13707e-31	-3.88394	2.20359e-40	1.18642e-39	-3.54138	2.68e-27	1.09326e-26	-3.72353	8.35664e-33	4.20518e-32	-3.61433	3.22796e-29	1.25641e-28	-3.81861	4.43533e-61	1.49043e-60
ENSG00000026297	RNASET2	-5.55315	1.73024e-67	4.9278e-66	-4.52774	1.16723e-50	1.15819e-49	-4.67826	1.29103e-58	2.41884e-57	-4.59821	4.09137e-42	5.63514e-41	-4.44318	1.28529e-45	1.84604e-44	-4.78548	2.12141e-43	2.40665e-42	-4.5167	1.03368e-116	1.20268e-115
ENSG00000027075	PRKCH	-2.76336	1.57723e-48	1.24639e-47	-2.48779	7.68779e-41	4.19523e-40	-2.33803	1.06911e-40	5.85681e-40	-2.20956	5.31759e-27	2.13461e-26	-2.19011	1.91775e-28	7.23068e-28	-2.20063	1.87299e-31	8.39125e-31	-2.66831	7.59576e-95	5.3432e-94
ENSG00000027697	IFNGR1	-5.97926	2.94242e-65	6.89828e-64	-5.54164	1.61381e-55	2.1864e-54	-5.14164	5.91251e-53	7.20028e-52	-5.12218	5.16539e-41	6.41802e-40	-4.99245	8.53929e-43	9.5491e-42	-5.34098	1.9875e-47	3.31406e-46	-6.5882	2.11541e-134	3.88607e-133
ENSG00000028137	TNFRSF1B	-4.80451	2.59043e-46	1.7848e-45	-4.12442	9.34855e-31	3.01974e-30	-4.6293	3.8863e-44	2.572e-43	-4.20257	4.39853e-31	2.32727e-30	-4.40018	1.51446e-33	8.04631e-33	-4.00134	5.16968e-32	2.39372e-31	-4.27558	2.56735e-73	1.12832e-72
ENSG00000030582	GRN	-5.23528	2.05757e-75	1.12806e-73	-4.76103	2.39351e-67	6.96789e-66	-5.65627	5.99172e-60	1.21298e-58	-5.15729	2.76611e-43	4.26416e-42	-5.38445	1.06559e-51	2.80116e-50	-4.57978	2.33781e-52	6.69506e-51	-4.61918	2.41181e-107	2.25797e-106
ENSG00000038945	MSR1	-2.90184	1.0291e-31	3.29096e-31	-2.99074	2.11416e-27	5.80334e-27	-2.32915	7.49808e-23	1.71479e-22	-2.35127	2.41952e-16	5.23913e-16	-2.18171	1.93961e-15	3.73655e-15	-2.4848	3.64522e-19	8.20858e-19	-3.38745	2.23765e-92	1.49637e-91
ENSG00000042493	CAPG	-4.86161	3.96681e-52	3.91678e-51	-3.98474	1.23844e-39	6.32002e-39	-4.31169	5.3106e-49	4.86517e-48	-4.15463	3.35784e-34	2.25087e-33	-4.03866	1.02085e-35	6.33925e-35	-3.87132	6.43084e-35	3.67141e-34	-4.03513	2.94069e-75	1.36387e-74
ENSG00000042980	ADAM28	-5.96127	5.37915e-66	1.37057e-64	-5.40902	5.3988e-52	5.85147e-51	-4.74321	7.04155e-53	8.53099e-52	-4.78905	5.70756e-40	6.4594e-39	-4.43605	3.67115e-39	2.98997e-38	-4.9962	4.64286e-43	5.11077e-42	-5.82665	2.14811e-149	5.83178e-148
ENSG00000043462	LCP2	-4.73713	9.73901e-73	4.30165e-71	-4.0767	3.64306e-58	5.91368e-57	-4.07478	1.76672e-62	4.47717e-61	-4.01504	5.91641e-47	1.34455e-45	-4.00622	3.55628e-49	7.24105e-48	-3.98605	2.1371e-51	5.43534e-50	-4.08842	1.5505e-131	2.65773e-130
ENSG00000044574	HSPA5	-2.12254	6.02935e-25	1.43188e-24	-2.08981	3.79169e-26	9.89412e-26	-3.19172	1.31848e-37	6.03197e-37	-2.85974	1.13941e-30	5.88285e-30	-2.91708	3.09654e-34	1.73067e-33	-2.53488	7.34805e-33	3.63023e-32	-2.94232	2.92312e-42	6.77191e-42
ENSG00000049860	HEXB	-2.48939	7.51798e-33	2.53781e-32	-2.35924	2.29448e-30	7.27807e-30	-2.07114	5.13975e-27	1.39482e-26	-2.16985	6.69128e-22	1.95805e-21	-2.1129	6.10681e-23	1.68319e-22	-2.24635	5.67431e-24	1.63199e-23	-2.83621	4.51266e-60	1.48977e-59
ENSG00000051108	HERPUD1	-4.27065	5.80929e-48	4.44852e-47	-4.5388	2.6983e-52	2.97489e-51	-4.5076	1.06763e-51	1.17134e-50	-4.58287	5.6573e-40	6.40767e-39	-4.58627	4.65254e-42	4.85004e-41	-4.63957	1.58783e-42	1.66463e-41	-4.94758	3.09487e-107	2.88786e-106
ENSG00000051523	CYBA	-5.7313	1.75474e-65	4.21196e-64	-4.78119	4.39407e-46	3.31083e-45	-4.98674	6.04974e-51	6.32351e-50	-4.65967	2.25408e-35	1.67687e-34	-4.74412	3.91138e-39	3.16732e-38	-4.61189	9.23923e-40	7.67575e-39	-4.15707	1.5549e-77	7.53389e-77
ENSG00000054219	LY75	-3.51327	8.57232e-55	9.96568e-54	-3.52434	3.75233e-56	5.35125e-55	-3.46638	7.64191e-52	8.5253e-51	-3.44633	1.30361e-40	1.5699e-39	-3.41324	1.19143e-41	1.20253e-40	-3.47461	1.34924e-41	1.3129e-40	-3.63653	3.18799e-137	6.26481e-136
ENSG00000057252	SOAT1	-3.81	9.65291e-68	2.82764e-66	-3.71895	7.25918e-59	1.23231e-57	-3.06018	7.62808e-58	1.32527e-56	-3.06421	7.73462e-44	1.28364e-42	-2.99931	8.71604e-43	9.73902e-42	-3.06474	1.37569e-46	2.11379e-45	-4.18245	7.02677e-134	1.27751e-132
ENSG00000057657	PRDM1	-3.02064	1.62574e-36	6.53504e-36	-3.57454	4.51095e-49	4.06649e-48	-3.18708	2.90276e-45	2.06669e-44	-3.13454	2.4001e-35	1.78268e-34	-3.19245	1.5871e-36	1.04448e-35	-3.26436	3.296e-37	2.23918e-36	-3.51516	1.3309e-115	1.51964e-114
ENSG00000059377	TBXAS1	-5.84512	6.20994e-78	4.18651e-76	-5.2648	1.79963e-60	3.39904e-59	-5.12358	1.23711e-69	6.07348e-68	-4.96063	1.56439e-47	3.88069e-46	-4.81952	1.57965e-48	2.99963e-47	-4.92009	8.57046e-51	2.03296e-49	-5.56971	3.16219e-151	9.01929e-150
ENSG00000060558	GNA15	-3.40412	1.7001e-41	8.87856e-41	-2.80342	6.08159e-41	3.33682e-40	-3.04594	1.86163e-46	1.44202e-45	-2.95561	4.39615e-38	4.15438e-37	-3.18364	2.82757e-42	3.01594e-41	-2.89378	1.28648e-38	9.77699e-38	-2.62842	6.12261e-64	2.19287e-63
ENSG00000062582	MRPS24	-2.44218	1.72826e-63	3.56533e-62	-2.57315	2.36241e-69	7.77718e-68	-2.33364	2.55773e-56	3.94293e-55	-2.34646	4.64724e-44	7.83249e-43	-2.38588	2.05743e-48	3.85494e-47	-2.43639	1.81355e-48	3.41616e-47	-2.47333	6.64351e-145	1.62231e-143
ENSG00000064601	CTSA	-2.25781	3.56131e-46	2.4335e-45	-2.49409	3.34496e-54	4.15612e-53	-2.93791	2.24619e-49	2.11274e-48	-2.70406	8.22983e-39	8.29459e-38	-2.89854	8.249e-44	1.00457e-42	-2.50575	7.80988e-45	1.04206e-43	-2.4319	2.58294e-58	8.232e-58
ENSG00000066294	CD84	-5.84227	7.62632e-79	5.62591e-77	-5.36935	4.14666e-60	7.60761e-59	-4.91394	4.15949e-64	1.23644e-62	-4.75653	1.01388e-44	1.82914e-43	-4.56666	1.36444e-44	1.79337e-43	-4.78362	1.07301e-50	2.50309e-49	-5.58076	5.55077e-166	2.2539e-164
ENSG00000067066	SP100	-4.06013	1.18835e-70	4.47695e-69	-3.67481	4.6068e-56	6.53674e-55	-2.96781	1.20975e-24	2.95926e-24	-2.79459	4.18882e-17	9.41917e-17	-2.71789	1.91191e-15	3.68621e-15	-3.06299	3.08097e-23	8.54041e-23	-3.7606	5.47016e-132	9.50365e-131
ENSG00000067082	KLF6	-5.08117	1.03747e-67	3.01402e-66	-5.28973	1.75657e-62	3.77864e-61	-5.39336	6.76354e-71	3.7081e-69	-5.20566	7.31787e-53	3.17258e-51	-5.34075	9.42348e-58	4.67524e-56	-5.28978	6.82665e-56	2.90597e-54	-4.71571	9.20741e-138	1.84279e-136
ENSG00000068079	IFI35	-2.63421	1.11487e-48	8.86489e-48	-2.29628	1.07729e-35	4.48156e-35	-2.67845	3.45351e-44	2.29854e-43	-2.4324	3.12303e-28	1.36276e-27	-2.58727	8.8674e-38	6.42043e-37	-2.21108	5.85179e-34	3.13147e-33	-2.08276	2.04013e-49	5.43186e-49
ENSG00000068697	LAPTM4A	-2.20568	4.012e-52	3.95862e-51	-2.10142	8.33573e-42	4.80174e-41	-3.8164	2.47988e-48	2.17568e-47	-3.6921	3.24108e-34	2.17668e-33	-3.50985	1.08569e-40	1.00179e-39	-3.25619	2.28191e-42	2.35374e-41	-2.82304	1.16815e-72	5.06281e-72
ENSG00000070190	DAPP1	-3.46875	5.6524e-56	7.09825e-55	-3.30814	8.89607e-53	1.00437e-51	-3.09606	2.98258e-46	2.28147e-45	-3.03866	8.83162e-36	6.77395e-35	-3.02405	4.57921e-36	2.90505e-35	-3.17718	1.93512e-39	1.56341e-38	-3.4567	1.30385e-134	2.40461e-133
ENSG00000073737	DHRS9	-6.09808	4.23917e-56	5.38107e-55	-5.70653	2.53525e-52	2.8039e-51	-5.75383	1.25782e-50	1.29174e-49	-5.68365	9.86974e-40	1.08559e-38	-5.59854	1.80868e-40	1.63571e-39	-5.62927	6.63806e-40	5.5839e-39	-6.01198	9.14628e-134	1.65431e-132
ENSG00000073756	PTGS2	-6.06134	1.66713e-56	2.177e-55	-4.99669	1.73441e-39	8.80326e-39	-4.54297	7.59667e-40	3.94971e-39	-4.58306	7.13203e-33	4.32402e-32	-4.66084	1.36431e-35	8.39436e-35	-4.70165	5.10795e-25	1.55714e-24	-5.70644	8.47958e-103	7.19309e-102
ENSG00000073849	ST6GAL1	-6.07033	3.65428e-59	5.6457e-58	-4.67449	1.13132e-44	7.76063e-44	-4.50784	3.59116e-55	5.07517e-54	-4.29545	1.60288e-40	1.90587e-39	-4.2312	1.73119e-41	1.72263e-40	-4.2122	1.29017e-42	1.36271e-41	-5.45316	4.85623e-129	7.80208e-128
ENSG00000075624	ACTB	-4.05909	1.21415e-65	2.95463e-64	-3.27273	1.04083e-54	1.3367e-53	-4.21747	3.14616e-46	2.40268e-45	-3.7437	8.02424e-40	8.95182e-39	-4.06557	8.35573e-42	8.56234e-41	-3.27048	6.46496e-43	7.00021e-42	-2.98625	5.74254e-50	1.5459e-49
ENSG00000075884	ARHGAP15	-3.69291	2.3374e-56	3.01869e-55	-3.51532	4.16999e-54	5.13145e-53	-3.029	7.54992e-45	5.23774e-44	-3.11783	3.19884e-33	1.98904e-32	-2.97148	2.972e-33	1.54522e-32	-3.22204	5.34414e-38	3.85358e-37	-3.62716	5.72138e-135	1.06211e-133
ENSG00000076662	ICAM3	-2.33256	5.38841e-21	1.10481e-20	-2.32503	9.02503e-22	1.97427e-21	-2.30767	7.34777e-20	1.5e-19	-2.28108	3.02404e-15	6.24303e-15	-2.28538	4.34274e-16	8.61213e-16	-2.29544	1.19916e-15	2.31137e-15	-2.31615	1.09386e-51	3.04774e-51
ENSG00000076944	STXBP2	-3.94076	1.06528e-73	5.21173e-72	-3.83328	1.77109e-64	4.34751e-63	-4.15748	4.76755e-74	3.3091e-72	-4.07279	6.21932e-54	2.98062e-52	-4.1534	1.79467e-62	1.3818e-60	-4.04139	5.89531e-58	3.33594e-56	-3.63663	3.05681e-130	5.04929e-129
ENSG00000077420	APBB1IP	-5.43536	5.87888e-59	8.99386e-58	-4.51694	5.73074e-42	3.35046e-41	-4.58605	1.03516e-51	1.13771e-50	-4.34924	5.13016e-38	4.83181e-37	-4.22931	5.1061e-40	4.43831e-39	-4.34786	1.64975e-39	1.3411e-38	-4.99629	2.04694e-113	2.21346e-112
ENSG00000077454	LRCH4	-2.11388	5.06338e-28	1.37146e-27	-2.7055	2.37545e-43	1.50292e-42	-3.04927	1.04507e-45	7.69736e-45	-2.81469	2.87873e-30	1.44965e-29	-2.97567	1.093e-38	8.54153e-38	-2.67653	2.989e-33	1.52425e-32	-2.71374	2.26856e-99	1.76694e-98
ENSG00000079263	SP140	-2.94883	3.42632e-65	7.96648e-64	-2.82026	2.49152e-61	4.97951e-60	-2.30051	3.66947e-50	3.66687e-49	-2.32112	5.28021e-38	4.9665e-37	-2.31061	3.35382e-42	3.54503e-41	-2.46841	1.69629e-43	1.93842e-42	-2.82369	1.22565e-146	3.10601e-145
ENSG00000079277	MKNK1	-3.02296	4.39409e-51	4.03866e-50	-3.49991	6.76289e-57	1.01371e-55	-3.22106	9.61764e-47	7.596e-46	-3.24358	5.49256e-38	5.15934e-37	-3.14444	3.74862e-39	3.04602e-38	-3.54576	1.59728e-41	1.54572e-40	-3.15411	5.36073e-113	5.7483e-112
ENSG00000081237	PTPRC	-6.20909	3.20068e-65	7.46649e-64	-5.53602	6.20732e-46	4.63985e-45	-4.6095	6.33577e-46	4.73586e-45	-4.51471	1.85288e-33	1.17652e-32	-4.24758	2.15905e-31	9.86416e-31	-4.69979	1.4848e-40	1.32915e-39	-6.3033	9.95806e-160	3.40556e-158
ENSG00000082074	FYB	-5.63273	7.01405e-64	1.48837e-62	-4.89468	1.07884e-43	6.95694e-43	-4.42523	1.66434e-48	1.47488e-47	-4.21504	1.9061e-35	1.42478e-34	-4.03956	9.07083e-36	5.66776e-35	-4.40789	5.16546e-39	4.04341e-38	-4.82873	2.21832e-99	1.72973e-98
ENSG00000083223	ZCCHC6	-3.31601	3.81042e-45	2.45491e-44	-3.36808	7.92045e-47	6.23111e-46	-2.03149	1.18684e-29	3.63929e-29	-2.13613	1.36353e-25	5.00705e-25	-2.01123	5.9827e-25	1.83492e-24	-2.28338	2.87797e-27	9.99768e-27	-3.78212	2.59411e-118	3.14553e-117
ENSG00000084070	SMAP2	-4.12682	5.0097e-48	3.85088e-47	-3.51184	1.21791e-38	5.87078e-38	-3.64286	7.77632e-45	5.38684e-44	-3.6174	5.86777e-34	3.8616e-33	-3.63586	1.5892e-35	9.7229e-35	-3.46826	4.46061e-33	2.24144e-32	-3.76111	2.31306e-58	7.37519e-58
ENSG00000085265	FCN1	-2.79423	8.45846e-19	1.60102e-18	-2.71406	8.99426e-19	1.76331e-18	-2.60411	2.53427e-16	4.54529e-16	-2.59421	9.58939e-13	1.75839e-12	-2.64574	2.96967e-13	5.21403e-13	-2.64243	2.93413e-13	5.10647e-13	-2.7216	3.00881e-42	6.96698e-42
ENSG00000085514	PILRA	-3.7837	1.61462e-55	1.9697e-54	-5.08193	3.29008e-62	6.9501e-61	-5.35486	1.03059e-61	2.4364e-60	-5.05197	6.04851e-46	1.23692e-44	-5.17806	4.65489e-53	1.45105e-51	-5.13429	3.62852e-50	8.05131e-49	-4.7361	3.78179e-115	4.24924e-114
ENSG00000085662	AKR1B1	-2.08569	2.86295e-42	1.55809e-41	-2.45822	4.24645e-44	2.81565e-43	-2.81928	5.98629e-56	8.95402e-55	-2.85364	4.07491e-42	5.61795e-41	-2.84685	1.97166e-42	2.13042e-41	-2.82276	4.14895e-44	5.04824e-43	-2.64532	3.13333e-63	1.10759e-62
ENSG00000085871	MGST2	-2.80187	1.26113e-62	2.46112e-61	-3.07275	7.15328e-56	9.96931e-55	-3.31048	1.19566e-65	4.18036e-64	-3.26078	1.08385e-47	2.74665e-46	-3.32337	1.46963e-49	3.09061e-48	-3.25631	1.33805e-50	3.08562e-49	-3.17984	6.61021e-117	7.72287e-116
ENSG00000086730	LAT2	-5.13217	2.25434e-65	5.35644e-64	-4.89887	3.18237e-51	3.27058e-50	-5.18293	9.08266e-65	2.9218e-63	-4.92814	1.20376e-43	1.94284e-42	-4.89321	8.74223e-44	1.06188e-42	-5.00733	1.02781e-47	1.75324e-46	-5.00073	5.33744e-113	5.72769e-112
ENSG00000087074	PPP1R15A	-4.31708	6.57958e-55	7.77737e-54	-4.08571	2.39988e-49	2.19859e-48	-4.9269	1.02234e-55	1.51151e-54	-4.53179	4.88909e-42	6.68429e-41	-4.85061	5.57814e-47	9.19251e-46	-4.32484	2.33528e-34	1.28682e-33	-4.01927	1.46003e-75	6.8209e-75
ENSG00000087086	FTL	-4.52581	4.68004e-51	4.28471e-50	-3.3413	8.14736e-44	5.28528e-43	-4.69545	1.56606e-55	2.27248e-54	-4.13745	3.81239e-36	3.01609e-35	-4.22132	2.68065e-41	2.61748e-40	-3.96481	9.87984e-41	8.94478e-40	-3.74138	1.74682e-85	1.00133e-84
ENSG00000087245	MMP2	-3.33747	6.03029e-52	5.86787e-51	-2.97213	6.86811e-46	5.10938e-45	-3.08314	1.00423e-45	7.4082e-45	-2.88812	2.22544e-29	1.04766e-28	-2.96833	1.34011e-35	8.25267e-35	-2.85727	5.81406e-34	3.11247e-33	-3.11609	2.24785e-108	2.16045e-107
ENSG00000087253	LPCAT2	-5.59483	2.22947e-64	4.91599e-63	-4.54387	5.04792e-47	4.01383e-46	-4.24295	1.33037e-51	1.44637e-50	-4.07756	1.97214e-37	1.75425e-36	-3.86703	1.00226e-37	7.20505e-37	-3.99718	4.60411e-38	3.33875e-37	-5.5669	2.22533e-153	6.71412e-152
ENSG00000087589	CASS4	-4.12997	2.94929e-49	2.43442e-48	-3.98658	1.77014e-47	1.44839e-46	-3.90629	2.98759e-44	2.00072e-43	-3.84376	2.95326e-34	1.99003e-33	-3.87917	6.28219e-37	4.26789e-36	-3.83664	2.74951e-35	1.60616e-34	-3.99894	5.67705e-113	6.07363e-112
ENSG00000089060	SLC8B1	-2.61598	2.60458e-50	2.28937e-49	-2.93191	5.68532e-54	6.91763e-53	-3.20381	1.3987e-54	1.90228e-53	-2.89821	2.9029e-38	2.78244e-37	-2.99049	1.22738e-42	1.3532e-41	-2.95837	1.31746e-42	1.39048e-41	-2.70754	4.63644e-92	3.08877e-91
ENSG00000089127	OAS1	-5.1179	1.84155e-71	7.30914e-70	-4.64253	4.55914e-57	6.91478e-56	-4.45565	5.21724e-55	7.3291e-54	-4.39154	2.07452e-42	2.93768e-41	-4.37242	4.52832e-44	5.6364e-43	-4.3208	1.44206e-45	2.05654e-44	-4.92418	3.69067e-129	5.97718e-128
ENSG00000089327	FXYD5	-3.2846	6.24881e-48	4.77471e-47	-2.54176	3.23694e-33	1.18525e-32	-3.46161	1.52904e-46	1.19094e-45	-3.23273	2.04801e-31	1.11115e-30	-3.32044	1.22181e-37	8.74317e-37	-2.95926	2.10098e-32	1.00077e-31	-2.31367	3.9473e-59	1.27974e-58
ENSG00000089639	GMIP	-3.38885	2.41847e-47	1.78037e-46	-2.36164	8.4766e-34	3.18155e-33	-2.7628	2.12693e-35	8.65139e-35	-2.56997	6.75159e-27	2.68728e-26	-2.71602	2.31693e-30	9.86271e-30	-2.27404	3.42873e-24	9.9857e-24	-2.45413	2.67137e-63	9.45955e-63
ENSG00000089820	ARHGAP4	-2.54947	4.43598e-30	1.31891e-29	-3.39534	8.49486e-51	8.5009e-50	-3.75971	1.17182e-57	2.01352e-56	-3.51052	9.06642e-37	7.63118e-36	-3.67631	1.18165e-44	1.56261e-43	-3.5076	9.14324e-42	9.04693e-41	-3.24675	1.60999e-90	1.03773e-89
ENSG00000090104	RGS1	-9.72593	1.80743e-52	1.81775e-51	-8.77234	1.23353e-40	6.65662e-40	-7.86858	1.68645e-43	1.07912e-42	-8.02257	1.3867e-33	8.86908e-33	-7.67935	8.51438e-32	3.99094e-31	-8.61053	2.28884e-39	1.82925e-38	-9.9338	1.67523e-113	1.8143e-112
ENSG00000090339	ICAM1	-5.59169	3.26226e-56	4.17486e-55	-4.95458	2.34654e-43	1.48597e-42	-4.88666	1.37709e-41	7.88747e-41	-4.55378	8.72902e-29	3.94711e-28	-4.70419	2.18441e-29	8.74882e-29	-4.38303	3.20622e-29	1.24829e-28	-4.92029	4.77618e-75	2.20283e-74
ENSG00000090382	LYZ	-5.63874	1.80198e-35	6.93145e-35	-5.25745	8.79923e-32	2.98966e-31	-4.63897	6.55608e-26	1.69714e-25	-4.72643	2.21541e-21	6.30354e-21	-4.67911	1.15117e-20	2.8243e-20	-4.57521	7.68912e-22	1.97089e-21	-5.75568	3.4001e-85	1.93487e-84
ENSG00000091073	DTX2	-2.2067	5.5188e-45	3.52014e-44	-2.33874	4.0638e-51	4.14919e-50	-2.58122	3.70071e-49	3.4282e-48	-2.36072	5.3627e-33	3.27953e-32	-2.47704	6.13936e-42	6.35588e-41	-2.38818	2.04953e-38	1.53036e-37	-2.06345	7.75512e-93	5.24578e-92
ENSG00000091317	CMTM6	-4.4067	1.66514e-68	5.20219e-67	-4.413	1.57984e-56	2.30196e-55	-3.86048	3.62976e-57	5.97469e-56	-3.88278	2.55646e-41	3.28354e-40	-3.78176	3.53854e-42	3.7291e-41	-4.00132	2.48209e-47	4.09996e-46	-5.10572	4.52998e-150	1.25644e-148
ENSG00000092010	PSME1	-2.38802	5.06528e-46	3.43289e-45	-2.05125	3.53357e-37	1.57957e-36	-2.96725	6.41511e-47	5.13865e-46	-2.73001	1.09478e-33	7.06614e-33	-2.84274	3.19502e-38	2.40223e-37	-2.39123	8.10006e-36	4.94258e-35	-2.40681	3.58094e-75	1.65482e-74
ENSG00000092036	HAUS4	-2.81174	1.33237e-48	1.05705e-47	-3.02294	2.25575e-49	2.07194e-48	-2.69596	5.0346e-48	4.33868e-47	-2.68718	3.0834e-36	2.45869e-35	-2.62058	9.04341e-36	5.65564e-35	-2.82027	1.86633e-39	1.5113e-38	-3.39501	1.44527e-126	2.18496e-125
ENSG00000092531	SNAP23	-3.71507	2.81443e-64	6.13859e-63	-3.57476	6.08095e-59	1.03479e-57	-3.12463	6.08737e-52	6.87268e-51	-3.21654	4.52829e-42	6.20658e-41	-2.98307	1.87594e-40	1.69327e-39	-3.39582	1.46154e-44	1.87381e-43	-4.06948	6.23268e-137	1.21801e-135
ENSG00000093072	CECR1	-3.65964	1.25988e-42	6.99987e-42	-4.12013	7.41954e-52	7.9258e-51	-4.55784	4.30245e-59	8.30432e-58	-4.28912	3.58496e-44	6.11527e-43	-4.19093	1.21113e-48	2.34086e-47	-4.18575	9.48542e-48	1.62987e-46	-4.2793	3.04199e-115	3.42345e-114
ENSG00000095303	PTGS1	-6.02439	7.5747e-72	3.12984e-70	-5.34041	1.33136e-57	2.09831e-56	-5.32284	1.3291e-65	4.62396e-64	-5.02502	1.11307e-48	3.07513e-47	-5.13279	4.64046e-50	1.03129e-48	-5.09324	9.11859e-51	2.15211e-49	-5.86192	4.89661e-158	1.61956e-156
ENSG00000095585	BLNK	-5.8356	6.67024e-60	1.08027e-58	-5.40067	3.65999e-54	4.53157e-53	-5.29223	1.11709e-52	1.33389e-51	-5.21112	2.3532e-40	2.7493e-39	-5.10726	3.14706e-41	3.04129e-40	-5.23505	1.16906e-41	1.14548e-40	-5.74161	8.85518e-137	1.72572e-135
ENSG00000095970	TREM2	-7.69488	8.16395e-61	1.41141e-59	-6.52383	7.91614e-48	6.61949e-47	-6.4885	5.10291e-54	6.6451e-53	-6.19151	1.85749e-40	2.19013e-39	-6.06634	1.55498e-40	1.41627e-39	-6.09161	4.33893e-44	5.2703e-43	-6.96302	3.1657e-100	2.52004e-99
ENSG00000096060	FKBP5	-4.26683	3.27409e-34	1.18318e-33	-2.93352	1.86548e-21	4.03634e-21	-3.03615	1.06477e-22	2.42094e-22	-2.89353	2.89038e-17	6.54855e-17	-2.81829	2.28123e-17	4.77956e-17	-2.80946	3.51221e-17	7.21175e-17	-3.45797	3.17106e-55	9.4802e-55
ENSG00000099203	TMED1	-2.98652	3.79307e-58	5.50973e-57	-2.70425	4.61053e-51	4.68366e-50	-2.67538	1.23238e-48	1.10319e-47	-2.58555	5.33597e-36	4.1607e-35	-2.67954	5.15274e-40	4.4712e-39	-2.50303	5.09019e-41	4.71848e-40	-2.99538	2.50575e-97	1.872e-96
ENSG00000099860	GADD45B	-4.01091	4.59556e-33	1.56935e-32	-3.93074	1.53839e-27	4.24853e-27	-4.22682	1.43981e-32	5.03399e-32	-3.9405	3.8605e-25	1.37812e-24	-4.29385	1.15447e-26	3.89989e-26	-4.06662	8.91579e-24	2.53887e-23	-3.42543	3.04559e-31	5.79114e-31
ENSG00000099977	DDT	-2.91988	1.00428e-59	1.61165e-58	-2.97563	6.1337e-65	1.53779e-63	-3.11342	2.17637e-63	5.9085e-62	-3.07914	2.33632e-49	6.84382e-48	-3.0915	5.44291e-52	1.46077e-50	-3.07064	1.65314e-49	3.45589e-48	-2.96066	1.13824e-136	2.2121e-135
ENSG00000099985	OSM	-7.08402	2.05374e-75	1.12806e-73	-7.0985	1.01616e-71	3.9013e-70	-7.03335	3.79549e-71	2.11377e-69	-6.96065	6.3503e-54	3.03308e-52	-7.02587	1.34371e-55	5.38528e-54	-7.05615	5.01982e-58	2.87517e-56	-7.15414	2.87946e-174	1.45941e-172
ENSG00000100038	TOP3B	-2.37635	1.18316e-46	8.31459e-46	-2.49069	1.2481e-50	1.23495e-49	-2.31063	3.21181e-43	2.02029e-42	-2.29749	1.49676e-33	9.56431e-33	-2.31586	6.21733e-36	3.90906e-35	-2.34825	3.03353e-35	1.76622e-34	-2.49079	3.64287e-119	4.51832e-118
ENSG00000100055	CYTH4	-4.94656	1.84272e-63	3.79036e-62	-4.15682	1.60955e-48	1.40773e-47	-4.16269	2.02068e-52	2.35691e-51	-3.93293	9.84754e-38	9.00986e-37	-4.02231	1.93265e-40	1.74334e-39	-3.93351	2.63944e-40	2.29708e-39	-4.33128	5.41225e-113	5.79913e-112
ENSG00000100060	MFNG	-4.48078	3.99129e-66	1.0225e-64	-3.93996	4.33404e-48	3.67871e-47	-4.26245	1.00534e-58	1.90137e-57	-3.95274	2.83775e-41	3.6283e-40	-4.06505	1.66677e-44	2.17452e-43	-3.82392	5.33758e-45	7.27335e-44	-4.07927	1.79193e-109	1.75457e-108
ENSG00000100101	RP1-37E16.12	-2.19368	3.60114e-78	2.48726e-76	-2.19368	3.72654e-81	2.61228e-79	-2.19368	3.4949e-75	2.63332e-73	-2.19368	3.29656e-59	2.56622e-57	-2.19368	3.27796e-62	2.43087e-60	-2.19368	3.28678e-60	2.37491e-58	-2.19368	4.1594e-190	3.15086e-188
ENSG00000100122	CRYBB1	-4.14719	2.5399e-62	4.87564e-61	-3.43939	1.32372e-50	1.30702e-49	-3.49189	1.58961e-42	9.60857e-42	-3.50565	1.59152e-39	1.71835e-38	-3.67799	5.33776e-44	6.60888e-43	-3.39462	1.9094e-39	1.54351e-38	-3.24925	6.49625e-81	3.38007e-80
ENSG00000100219	XBP1	-2.90268	9.22219e-32	2.95521e-31	-3.18416	4.45507e-33	1.62243e-32	-2.96193	1.01001e-31	3.39644e-31	-2.97086	1.3703e-25	5.0293e-25	-2.94775	1.15049e-27	4.129e-27	-2.92699	6.5151e-25	1.9733e-24	-3.70862	4.28823e-65	1.57511e-64
ENSG00000100288	CHKB	-2.75249	4.82044e-43	2.75314e-42	-3.388	4.56607e-65	1.15921e-63	-3.3227	2.16422e-57	3.63455e-56	-3.19862	1.32651e-41	1.75169e-40	-3.26496	3.48414e-48	6.37553e-47	-3.19384	7.47052e-44	8.83051e-43	-3.14787	9.98158e-127	1.51716e-125
ENSG00000100292	HMOX1	-5.95091	1.43899e-57	2.00547e-56	-4.85978	1.11928e-43	7.20782e-43	-5.60717	9.11405e-55	1.26023e-53	-5.23368	1.55791e-40	1.8571e-39	-5.40252	8.10322e-44	9.87668e-43	-5.10543	2.393e-35	1.40606e-34	-5.18311	2.35542e-81	1.23697e-80
ENSG00000100297	MCM5	-2.62818	5.11795e-47	3.67356e-46	-3.05831	2.244e-45	1.61234e-44	-3.18932	4.23244e-51	4.47375e-50	-2.84429	9.9656e-35	6.99227e-34	-3.03139	1.42738e-40	1.30596e-39	-2.74258	6.13332e-36	3.78033e-35	-3.21325	1.73499e-106	1.58022e-105
ENSG00000100300	TSPO	-4.19426	5.48296e-56	6.89161e-55	-3.06983	6.01253e-38	2.80983e-37	-3.31005	5.97574e-43	3.6929e-42	-3.11705	2.0526e-30	1.04371e-29	-3.11989	1.22746e-30	5.31822e-30	-2.87231	1.15398e-32	5.61835e-32	-2.69512	6.39566e-62	2.18885e-61
ENSG00000100365	NCF4	-5.30064	1.13606e-64	2.55704e-63	-4.56385	2.40877e-49	2.2053e-48	-4.92589	1.17445e-55	1.72375e-54	-4.79364	1.54993e-41	2.03717e-40	-4.78976	5.4395e-44	6.71125e-43	-4.72215	3.61727e-43	4.01002e-42	-4.76017	1.44516e-106	1.32481e-105
ENSG00000100368	CSF2RB	-4.10667	1.70085e-50	1.51581e-49	-3.76657	1.08495e-43	6.99312e-43	-3.70483	4.26474e-42	2.50793e-41	-3.50646	6.75313e-31	3.52544e-30	-3.63115	6.28569e-34	3.43543e-33	-3.54418	5.3646e-33	2.67945e-32	-4.0614	2.59628e-117	3.05356e-116
ENSG00000100445	SDR39U1	-2.19361	1.98231e-33	6.89479e-33	-3.15246	1.54572e-56	2.2569e-55	-3.43286	6.80229e-58	1.18913e-56	-3.26554	4.22091e-43	6.43643e-42	-3.44651	3.04989e-49	6.27343e-48	-3.30605	3.32566e-47	5.38597e-46	-3.38073	3.39127e-99	2.62688e-98
ENSG00000100504	PYGL	-3.47396	3.07743e-42	1.66965e-41	-3.24439	2.55963e-36	1.10257e-35	-3.13737	3.21572e-38	1.5225e-37	-3.05378	2.11197e-29	9.95572e-29	-2.99266	5.39788e-29	2.10624e-28	-2.99625	2.82032e-30	1.17361e-29	-3.6206	1.00183e-91	6.60541e-91
ENSG00000100600	LGMN	-5.03148	1.24963e-55	1.53508e-54	-4.29672	6.05824e-49	5.41285e-48	-4.03854	3.92543e-48	3.40365e-47	-4.10655	3.56111e-37	3.09538e-36	-4.19674	3.41442e-41	3.29064e-40	-4.06457	2.31623e-38	1.7222e-37	-4.47484	9.49955e-80	4.8147e-79
ENSG00000100612	DHRS7	-3.35078	9.66358e-44	5.75242e-43	-3.18157	7.37115e-42	4.26352e-41	-3.05717	2.03492e-53	2.54862e-52	-3.07886	4.43178e-43	6.75068e-42	-3.1905	1.39567e-49	2.94827e-48	-3.01327	1.9726e-43	2.24326e-42	-3.66469	1.97902e-79	9.96939e-79
ENSG00000100889	PCK2	-2.11711	9.10974e-29	2.55181e-28	-2.26903	4.00259e-39	1.98022e-38	-2.33492	6.30419e-45	4.39515e-44	-2.20607	4.20317e-33	2.5884e-32	-2.19382	7.30282e-35	4.2625e-34	-2.20732	2.714e-35	1.58607e-34	-2.22295	3.62629e-79	1.8196e-78
ENSG00000100902	PSMA6	-3.46253	2.01657e-71	7.93673e-70	-3.54559	1.17183e-74	5.39579e-73	-2.6629	9.85523e-53	1.1838e-51	-2.81386	2.81237e-47	6.69364e-46	-2.68069	1.69396e-46	2.65198e-45	-2.99988	1.36817e-51	3.5699e-50	-3.34747	4.28477e-146	1.06477e-144
ENSG00000100906	NFKBIA	-2.71671	1.55718e-27	4.12806e-27	-2.79314	4.33527e-27	1.17492e-26	-2.98741	1.73884e-31	5.77155e-31	-2.72918	6.58528e-22	1.92823e-21	-2.97571	8.75708e-23	2.39262e-22	-2.81322	2.29873e-22	6.07333e-22	-2.7623	3.45672e-53	9.91152e-53
ENSG00000100926	TM9SF1	-3.75386	2.89398e-77	1.85346e-75	-3.86601	3.3703e-83	2.6092e-81	-3.76091	2.33569e-70	1.20549e-68	-3.66805	1.0236e-54	5.20666e-53	-3.76283	2.71286e-59	1.56656e-57	-3.59684	6.47608e-58	3.62095e-56	-3.65173	2.0235e-167	8.53624e-166
ENSG00000101000	PROCR	-2.379	3.43955e-32	1.12496e-31	-3.24778	5.32676e-44	3.5072e-43	-3.13531	3.08984e-45	2.19545e-44	-2.94061	5.60087e-30	2.75834e-29	-2.96853	3.21278e-33	1.66427e-32	-3.04423	7.46914e-38	5.32862e-37	-3.21748	1.46274e-97	1.09628e-96
ENSG00000101017	CD40	-2.03385	2.78882e-22	5.99368e-22	-3.16701	1.66191e-35	6.8549e-35	-3.47414	1.20348e-38	5.85127e-38	-3.25039	3.73193e-27	1.51144e-26	-3.31705	1.30936e-29	5.32283e-29	-3.24011	6.10225e-30	2.48859e-29	-3.06836	3.80157e-74	1.71955e-73
ENSG00000101084	C20orf24	-3.00236	9.4073e-31	2.884e-30	-2.89218	6.69055e-31	2.17563e-30	-3.06611	1.7461e-21	3.80021e-21	-3.1346	2.53985e-19	6.44917e-19	-3.24601	2.70137e-22	7.2006e-22	-3.57792	1.03406e-25	3.27709e-25	-3.1748	1.06406e-62	3.71378e-62
ENSG00000101307	SIRPB1	-2.79183	1.82443e-27	4.82201e-27	-2.74472	6.63542e-28	1.86799e-27	-2.65405	1.97371e-24	4.78157e-24	-2.61438	8.43297e-19	2.07765e-18	-2.65562	6.22032e-20	1.47425e-19	-2.60073	8.65842e-19	1.91428e-18	-2.87652	4.22764e-70	1.73818e-69
ENSG00000101336	HCK	-6.21579	3.18647e-69	1.049e-67	-5.43014	7.58135e-47	5.97434e-46	-5.36808	7.84825e-55	1.09163e-53	-5.09033	1.84321e-39	1.97047e-38	-5.09328	4.69463e-42	4.88894e-41	-5.03937	9.30804e-42	9.20353e-41	-5.7843	2.49739e-112	2.62991e-111
ENSG00000101347	SAMHD1	-2.76326	1.9397e-42	1.06593e-41	-2.38902	2.09714e-30	6.67012e-30	-2.34982	1.22932e-42	7.46281e-42	-2.13659	1.20679e-23	3.89991e-23	-2.15643	3.21094e-29	1.26978e-28	-2.02975	8.05562e-26	2.5668e-25	-2.66582	9.42453e-72	4.02277e-71
ENSG00000101463	SYNDIG1	-2.2218	1.11824e-26	2.84559e-26	-2.53187	2.52787e-31	8.40437e-31	-2.61441	1.07006e-31	3.59066e-31	-2.35688	7.47523e-23	2.3113e-22	-2.6777	6.35346e-28	2.31498e-27	-2.3602	1.76689e-24	5.22905e-24	-2.69709	7.61361e-44	1.81731e-43
ENSG00000101608	MYL12A	-3.96248	1.02846e-62	2.01824e-61	-3.7511	6.01849e-49	5.38074e-48	-3.60623	2.63873e-49	2.4737e-48	-3.58471	6.87791e-36	5.31886e-35	-3.55751	7.70505e-35	4.48983e-34	-3.65525	2.80211e-42	2.87558e-41	-4.41817	3.53124e-109	3.4385e-108
ENSG00000102034	ELF4	-2.46387	1.67705e-50	1.49555e-49	-2.15838	2.05811e-39	1.03938e-38	-2.27389	1.43626e-42	8.69283e-42	-2.13391	6.89254e-30	3.36274e-29	-2.1906	2.94149e-33	1.53003e-32	-2.06318	1.79288e-31	8.03489e-31	-2.36609	1.14548e-106	1.05351e-105
ENSG00000102218	RP2	-2.52025	1.01285e-38	4.56822e-38	-2.8053	2.8376e-43	1.78331e-42	-2.48512	4.89838e-40	2.58012e-39	-2.451	5.45736e-29	2.50633e-28	-2.34152	3.37806e-28	1.24926e-27	-2.46971	3.91136e-31	1.71632e-30	-3.55447	3.46067e-125	5.03727e-124
ENSG00000102393	GLA	-2.70179	3.80577e-57	5.16106e-56	-2.77859	1.55224e-54	1.96329e-53	-2.73425	8.05988e-46	5.98649e-45	-2.85497	8.03888e-41	9.80674e-40	-2.8164	2.94531e-46	4.48157e-45	-2.85706	1.47431e-33	7.6795e-33	-3.01232	2.15979e-86	1.26429e-85
ENSG00000102445	KIAA0226L	-3.26668	2.08659e-43	1.21929e-42	-3.4042	9.58903e-51	9.55513e-50	-2.99768	1.84212e-44	1.24846e-43	-3.07333	1.15286e-34	8.0335e-34	-2.98193	4.51231e-35	2.68377e-34	-3.17135	1.403e-35	8.38702e-35	-3.5285	3.1443e-112	3.29637e-111
ENSG00000102699	PARP4	-3.4927	2.55884e-47	1.87781e-46	-2.70584	1.18192e-35	4.90666e-35	-2.49574	1.27085e-44	8.71351e-44	-2.19272	1.32873e-28	5.93966e-28	-2.13141	3.08365e-29	1.22115e-28	-2.09633	4.54002e-31	1.986e-30	-3.40715	5.04111e-103	4.29439e-102
ENSG00000102854	MSLN	-3.39228	1.26474e-34	4.68213e-34	-3.41428	1.09954e-32	3.92117e-32	-3.53048	1.77279e-34	6.85284e-34	-3.46486	1.91079e-26	7.38224e-26	-3.55764	5.51366e-29	2.14903e-28	-3.38988	1.17449e-25	3.71045e-25	-3.43684	1.86876e-80	9.61679e-80
ENSG00000102879	CORO1A	-3.65828	5.3949e-53	5.68543e-52	-2.91782	7.58024e-39	3.68804e-38	-3.72984	6.56334e-50	6.41314e-49	-3.43409	2.6213e-36	2.10451e-35	-3.41869	2.5261e-39	2.08023e-38	-3.25756	7.46377e-38	5.32828e-37	-2.88159	3.27337e-49	8.68255e-49
ENSG00000102931	ARL2BP	-4.43712	2.10781e-69	6.988e-68	-4.20776	1.11453e-66	3.10966e-65	-3.59108	3.3423e-48	2.91237e-47	-3.77147	1.9358e-35	1.4462e-34	-3.75239	1.99845e-44	2.56917e-43	-3.82782	7.25949e-45	9.75083e-44	-4.44903	1.38816e-126	2.10087e-125
ENSG00000103061	SLC7A6OS	-2.6783	2.22538e-54	2.50845e-53	-2.86869	3.13054e-61	6.20384e-60	-2.45543	4.64898e-50	4.60001e-49	-2.4249	5.98725e-39	6.1175e-38	-2.43232	2.3508e-42	2.51884e-41	-2.50357	1.66717e-41	1.60989e-40	-3.04771	3.60666e-128	5.69069e-127
ENSG00000103066	PLA2G15	-2.96996	1.7191e-47	1.27552e-46	-3.72549	1.41666e-57	2.23025e-56	-3.65382	2.40279e-52	2.78644e-51	-3.53012	8.30762e-42	1.11268e-40	-3.62525	1.41826e-43	1.68351e-42	-3.53696	6.62768e-43	7.15038e-42	-3.88402	2.28702e-106	2.07629e-105
ENSG00000103274	NUBP1	-2.85267	1.12085e-61	2.05903e-60	-3.13071	8.65983e-70	2.94017e-68	-3.11329	5.51772e-53	6.72532e-52	-3.00857	1.85747e-42	2.64897e-41	-3.02121	5.61263e-52	1.50346e-50	-3.01622	2.26471e-51	5.72886e-50	-3.08425	3.63401e-107	3.38646e-106
ENSG00000103426	CORO7-PAM16	-5.41898	1.25734e-91	2.68423e-89	-5.41898	4.17563e-95	8.52676e-93	-5.41898	3.80249e-88	8.92952e-86	-5.41898	1.5415e-69	3.67029e-67	-5.41898	4.91642e-73	1.08238e-70	-5.41898	1.05204e-70	2.21243e-68	-5.41898	3.76494e-222	8.69638e-220
ENSG00000103490	PYCARD	-3.80622	1.34003e-51	1.27231e-50	-4.11964	1.29434e-53	1.55078e-52	-4.10727	3.37739e-52	3.8752e-51	-4.03457	4.0755e-39	4.25046e-38	-3.99071	1.32811e-40	1.21751e-39	-4.00995	1.14531e-40	1.02918e-39	-4.11402	2.74861e-119	3.42724e-118
ENSG00000103811	CTSH	-3.23932	5.84391e-41	2.9651e-40	-2.68501	3.54189e-36	1.51365e-35	-2.65413	1.8221e-42	1.09809e-41	-2.67662	5.70177e-31	2.98987e-30	-2.67941	2.60298e-34	1.46353e-33	-2.5312	2.67582e-33	1.36999e-32	-2.5693	2.98457e-66	1.1232e-65
ENSG00000103855	CD276	-2.7949	2.4958e-44	1.53566e-43	-2.34137	4.48249e-38	2.10668e-37	-2.45677	3.79855e-35	1.5257e-34	-2.25717	7.38032e-26	2.76345e-25	-2.39533	8.89144e-29	3.4239e-28	-2.19237	3.05212e-26	9.97087e-26	-2.10683	3.5947e-61	1.21055e-60
ENSG00000104043	ATP8B4	-3.58324	1.63681e-51	1.53913e-50	-3.55048	6.78344e-51	6.81245e-50	-2.13511	8.17482e-31	2.61906e-30	-2.30917	2.10176e-25	7.65612e-25	-2.03744	1.3036e-21	3.3396e-21	-2.52126	1.88302e-30	7.91756e-30	-3.77672	5.02742e-135	9.3575e-134
ENSG00000104312	RIPK2	-3.3583	5.51043e-52	5.37314e-51	-2.59611	1.43374e-43	9.18243e-43	-2.7935	3.965e-45	2.79055e-44	-2.74442	4.94738e-34	3.27424e-33	-2.55612	5.24192e-34	2.87836e-33	-2.67869	1.82959e-34	1.01412e-33	-3.21328	1.0939e-96	8.00675e-96
ENSG00000104689	TNFRSF10A	-2.69072	1.76363e-43	1.03454e-42	-2.40784	2.00662e-36	8.70213e-36	-2.29916	3.63529e-35	1.46138e-34	-2.17822	5.10437e-24	1.69106e-23	-2.25796	1.54897e-26	5.20263e-26	-2.18762	8.77178e-27	2.9561e-26	-2.51188	2.68636e-85	1.53242e-84
ENSG00000104763	ASAH1	-3.06388	4.65992e-45	2.98854e-44	-3.11814	8.81858e-43	5.3743e-42	-2.64456	9.35081e-34	3.46901e-33	-2.70167	1.54708e-27	6.44539e-27	-2.55888	3.17442e-32	1.53756e-31	-2.90949	8.99121e-37	5.87871e-36	-4.03346	1.12283e-86	6.61125e-86
ENSG00000104774	MAN2B1	-4.21487	3.49876e-64	7.57259e-63	-4.311	1.86252e-57	2.90298e-56	-4.71409	6.4483e-60	1.30354e-58	-4.3783	8.16476e-44	1.34081e-42	-4.50613	2.89963e-51	7.26973e-50	-4.26925	2.14522e-45	3.01358e-44	-4.02292	4.9106e-130	8.06414e-129
ENSG00000104814	MAP4K1	-2.85994	1.83219e-55	2.2274e-54	-2.79026	4.7389e-56	6.71741e-55	-2.86605	9.04602e-48	7.67822e-47	-2.78873	9.86561e-38	9.02054e-37	-2.90225	1.31921e-44	1.73554e-43	-2.80309	3.17537e-41	2.9907e-40	-2.4276	2.66185e-98	2.03061e-97
ENSG00000104870	FCGRT	-5.00786	5.9148e-63	1.17545e-61	-4.42858	2.62391e-52	2.89741e-51	-4.85228	3.89167e-61	8.80154e-60	-4.52609	9.12456e-40	1.00994e-38	-4.69121	1.38925e-45	1.98928e-44	-4.27404	2.09014e-47	3.47201e-46	-4.12786	3.21511e-96	2.32909e-95
ENSG00000104894	CD37	-3.83403	1.23365e-63	2.58279e-62	-3.15595	1.45214e-42	8.75884e-42	-3.57427	1.24644e-54	1.70178e-53	-3.37918	1.91881e-37	1.71223e-36	-3.34816	8.88385e-43	9.9108e-42	-3.31926	3.69751e-40	3.17864e-39	-3.26213	7.37745e-94	5.10301e-93
ENSG00000104951	IL4I1	-2.72298	1.8875e-19	3.66119e-19	-2.60228	9.98756e-18	1.88059e-17	-2.66916	8.29861e-18	1.56508e-17	-2.58415	2.27759e-13	4.29832e-13	-2.6999	6.45578e-15	1.21412e-14	-2.61969	7.87694e-14	1.40418e-13	-2.5164	3.31363e-39	7.26225e-39
ENSG00000104972	LILRB1	-4.81147	6.34895e-71	2.4243e-69	-4.27618	4.62048e-53	5.35383e-52	-4.48769	2.00372e-61	4.60562e-60	-4.30432	2.18569e-46	4.69457e-45	-4.37885	4.2706e-50	9.521e-49	-4.33727	4.22175e-48	7.54879e-47	-4.41542	2.64999e-114	2.9308e-113
ENSG00000104974	LILRA1	-4.13661	2.06049e-78	1.47372e-76	-3.82255	3.86318e-64	9.19462e-63	-3.89923	2.67267e-66	1.00617e-64	-3.79255	9.77439e-52	3.75262e-50	-3.82879	1.09927e-55	4.46655e-54	-3.77471	1.27745e-52	3.84601e-51	-4.04577	2.17671e-165	8.71301e-164
ENSG00000105246	EBI3	-6.02934	2.73595e-64	5.98596e-63	-5.09793	6.75023e-48	5.68164e-47	-5.68875	6.47714e-59	1.2383e-57	-5.3974	5.19436e-41	6.44832e-40	-5.42171	3.31257e-43	3.81053e-42	-5.23901	2.19771e-42	2.27355e-41	-5.17776	8.79044e-106	7.90915e-105
ENSG00000105281	SLC1A5	-3.98235	4.35092e-43	2.49704e-42	-3.4324	2.81153e-33	1.03136e-32	-3.60629	6.00675e-36	2.50919e-35	-3.37169	1.07719e-25	3.98677e-25	-3.33091	3.38485e-25	1.0596e-24	-3.32118	1.03301e-26	3.46303e-26	-3.60983	1.30514e-80	6.7509e-80
ENSG00000105352	CEACAM4	-2.53211	2.47394e-21	5.12991e-21	-2.43458	7.23437e-21	1.52776e-20	-2.33678	1.38696e-17	2.59456e-17	-2.33936	3.38808e-14	6.63951e-14	-2.40022	1.55243e-15	3.00753e-15	-2.41309	3.88214e-15	7.32547e-15	-2.48341	1.00832e-50	2.75868e-50
ENSG00000105355	PLIN3	-3.15925	4.68513e-40	2.28026e-39	-2.01941	7.21103e-18	1.36747e-17	-2.63179	4.87567e-36	2.04642e-35	-2.13627	2.8515e-21	8.0468e-21	-2.32718	1.21878e-24	3.67564e-24	-2.0431	4.08585e-21	1.01177e-20	-2.57716	3.54639e-53	1.01645e-52
ENSG00000105366	SIGLEC8	-7.21138	6.12593e-66	1.54963e-64	-6.27232	2.04559e-50	2.00155e-49	-6.33473	4.93324e-58	8.77643e-57	-5.9831	4.71745e-41	5.89262e-40	-5.95058	2.16488e-42	2.32493e-41	-5.91619	9.59849e-43	1.02457e-41	-6.70199	3.34464e-125	4.87343e-124
ENSG00000105383	CD33	-3.72487	3.05507e-70	1.10092e-68	-3.43792	3.84017e-61	7.55697e-60	-3.52752	2.26861e-62	5.70799e-61	-3.41641	2.12515e-45	4.07108e-44	-3.47871	2.97391e-51	7.44269e-50	-3.47429	1.19232e-50	2.76312e-49	-3.62809	1.01053e-152	2.98498e-151
ENSG00000105501	SIGLEC5	-2.79297	3.82094e-33	1.31182e-32	-2.73274	1.10049e-33	4.10428e-33	-2.72148	6.81533e-31	2.19493e-30	-2.70698	7.83942e-24	2.56699e-23	-2.69379	3.62383e-25	1.13089e-24	-2.72995	1.2283e-24	3.66745e-24	-2.75348	1.92983e-80	9.92381e-80
ENSG00000105612	DNASE2	-3.77071	1.43462e-59	2.28147e-58	-3.34651	2.01183e-53	2.38208e-52	-3.76028	6.48024e-57	1.0435e-55	-3.55181	8.02549e-44	1.32256e-42	-3.6931	6.40633e-48	1.15281e-46	-3.43104	8.99764e-45	1.19151e-43	-3.41424	1.67667e-107	1.57705e-106
ENSG00000105851	PIK3CG	-3.73845	9.3389e-64	1.97575e-62	-3.48792	2.38902e-57	3.68285e-56	-2.76279	1.32171e-44	9.04465e-44	-2.66385	1.76572e-32	1.03662e-31	-2.55595	8.97668e-34	4.84789e-33	-2.60927	5.652e-34	3.02916e-33	-3.68009	3.3534e-151	9.54533e-150
ENSG00000106034	CPED1	-4.57721	7.70257e-60	1.24318e-58	-4.33333	4.44177e-56	6.32167e-55	-3.59508	1.14132e-44	7.84829e-44	-3.56913	6.33774e-33	3.85407e-32	-3.45977	1.67152e-30	7.18039e-30	-3.59919	9.00996e-36	5.48619e-35	-4.596	1.28452e-146	3.24934e-145
ENSG00000106066	CPVL	-3.90651	2.05554e-46	1.42322e-45	-5.59767	1.54907e-50	1.52419e-49	-5.13931	3.31955e-52	3.81193e-51	-4.98424	6.2825e-35	4.48205e-34	-4.70411	4.53489e-39	3.64707e-38	-5.07319	5.71498e-44	6.85895e-43	-6.23564	5.33566e-154	1.64147e-152
ENSG00000106077	ABHD11	-2.84882	3.30327e-31	1.03222e-30	-2.98532	2.51529e-37	1.13192e-36	-3.2711	4.71887e-37	2.0915e-36	-3.04839	1.18617e-27	4.99049e-27	-3.26475	9.11666e-32	4.26332e-31	-3.0179	1.26778e-28	4.7826e-28	-2.13196	1.58559e-38	3.43601e-38
ENSG00000106133	NSUN5P2	-2.16687	1.92484e-35	7.39009e-35	-2.46879	9.26469e-48	7.70599e-47	-2.58874	2.39868e-46	1.84483e-45	-2.50796	9.09158e-35	6.40502e-34	-2.56242	1.99777e-37	1.40954e-36	-2.55763	2.22962e-36	1.41638e-35	-2.20864	4.79521e-79	2.3976e-78
ENSG00000106246	PTCD1	-2.25111	2.483e-65	5.85042e-64	-2.53076	6.78209e-76	3.37666e-74	-2.422	2.53209e-63	6.83469e-62	-2.3489	1.17565e-49	3.53197e-48	-2.42793	1.4326e-56	6.34758e-55	-2.37291	2.43393e-52	6.9281e-51	-2.42295	5.00205e-154	1.54221e-152
ENSG00000106366	SERPINE1	-7.46083	1.60507e-36	6.45972e-36	-7.11032	1.63386e-34	6.39831e-34	-7.03981	1.20191e-31	4.02349e-31	-6.80296	1.46974e-24	5.04596e-24	-6.90484	7.396e-25	2.25562e-24	-6.69211	8.6642e-24	2.46873e-23	-7.0632	1.256e-71	5.34652e-71
ENSG00000106560	GIMAP2	-2.91977	1.3134e-40	6.54379e-40	-2.5206	2.08805e-28	6.02265e-28	-2.32721	3.62076e-29	1.0887e-28	-2.28325	2.2262e-21	6.33169e-21	-2.13741	1.04216e-20	2.56356e-20	-2.39185	1.9343e-26	6.40221e-26	-2.85942	1.13991e-82	6.14437e-82
ENSG00000106565	TMEM176B	-4.26277	1.90349e-44	1.17943e-43	-3.10316	1.45505e-29	4.43856e-29	-3.70503	4.36118e-41	2.44427e-40	-3.40081	3.82404e-28	1.65329e-27	-3.34132	1.86034e-30	7.96725e-30	-3.22069	3.93574e-30	1.62243e-29	-3.19554	4.37093e-61	1.46949e-60
ENSG00000106588	PSMA2	-3.03415	1.60742e-63	3.32577e-62	-3.18039	2.78363e-69	9.12125e-68	-2.78171	3.49368e-53	4.32635e-52	-2.99458	2.72924e-47	6.52886e-46	-2.8736	7.9126e-48	1.40946e-46	-3.21835	4.29644e-55	1.70047e-53	-3.41185	3.14284e-152	9.16824e-151
ENSG00000106952	TNFSF8	-4.33827	3.14847e-79	2.35968e-77	-4.22093	4.89703e-75	2.33895e-73	-4.02411	1.70533e-65	5.87484e-64	-4.01993	3.25855e-52	1.31934e-50	-4.01086	8.8535e-58	4.40798e-56	-4.04624	6.18502e-57	3.06855e-55	-4.34024	4.41443e-191	3.47483e-189
ENSG00000106991	ENG	-2.97081	8.76425e-38	3.76259e-37	-2.79732	1.57694e-28	4.57843e-28	-3.95592	7.43515e-40	3.87288e-39	-3.47941	1.50813e-28	6.70333e-28	-3.77709	2.5044e-33	1.30789e-32	-3.30181	1.02783e-32	5.02657e-32	-2.25449	1.64508e-41	3.75433e-41
ENSG00000107099	DOCK8	-4.92907	3.5495e-62	6.69511e-61	-4.46097	5.55016e-51	5.60988e-50	-3.92768	2.61488e-50	2.63545e-49	-3.71359	3.18041e-33	1.97845e-32	-3.55327	5.06594e-35	2.99786e-34	-3.84245	1.39109e-37	9.7273e-37	-4.85135	1.31242e-144	3.17733e-143
ENSG00000107719	PALD1	-3.10976	2.49444e-33	8.62282e-33	-3.00521	5.91056e-32	2.03022e-31	-3.21253	4.96388e-32	1.69267e-31	-2.72596	6.424e-22	1.88336e-21	-2.99789	1.09382e-25	3.5067e-25	-2.59185	2.18099e-21	5.47384e-21	-2.85066	2.28517e-62	7.91108e-62
ENSG00000107738	C10orf54	-5.12282	4.40418e-43	2.52358e-42	-4.44139	2.55952e-35	1.04745e-34	-5.22874	2.17297e-45	1.56529e-44	-4.6545	1.14338e-30	5.9012e-30	-4.92936	8.04703e-35	4.67943e-34	-4.42771	2.3516e-32	1.11563e-31	-4.27422	1.37987e-65	5.13126e-65
ENSG00000107798	LIPA	-4.3489	6.84696e-45	4.34958e-44	-3.212	9.78011e-27	2.60988e-26	-3.50984	4.20832e-41	2.36236e-40	-3.30547	1.1732e-29	5.63025e-29	-3.19181	2.41985e-30	1.02884e-29	-3.22445	4.11593e-29	1.59061e-28	-4.75642	1.29776e-101	1.06807e-100
ENSG00000107968	MAP3K8	-4.67414	1.50917e-53	1.62571e-52	-4.02345	2.72474e-43	1.71544e-42	-3.78647	3.87612e-42	2.28513e-41	-3.79814	3.29215e-33	2.04255e-32	-3.67248	1.01005e-34	5.835e-34	-3.84633	2.13547e-34	1.17903e-33	-4.09149	1.66679e-97	1.24788e-96
ENSG00000108518	PFN1	-2.99136	3.53316e-42	1.91029e-41	-2.76171	2.69222e-38	1.27293e-37	-4.47952	1.58256e-45	1.15177e-44	-3.9856	1.22291e-30	6.3001e-30	-4.17853	1.10921e-35	6.86675e-35	-3.30977	1.29374e-31	5.84633e-31	-2.58363	6.98509e-69	2.79047e-68
ENSG00000108639	SYNGR2	-3.14844	2.90679e-42	1.57951e-41	-2.82432	3.83941e-27	1.04334e-26	-4.02464	3.7965e-47	3.09385e-46	-3.5353	1.50379e-32	8.88403e-32	-3.7504	3.45254e-36	2.20318e-35	-3.33338	5.32069e-32	2.46041e-31	-3.12324	8.1674e-79	4.06495e-78
ENSG00000108654	DDX5	-2.23911	1.57453e-34	5.79699e-34	-3.17007	2.35381e-44	1.58327e-43	-2.8791	3.01085e-54	3.99086e-53	-2.97049	3.0124e-42	4.21497e-41	-2.83034	7.4166e-45	1.00096e-43	-3.26852	5.99341e-51	1.44601e-49	-3.83774	4.48075e-90	2.86062e-89
ENSG00000108691	CCL2	-7.10078	3.89153e-46	2.65786e-45	-6.2299	1.01282e-35	4.22458e-35	-6.65611	9.99026e-39	4.89439e-38	-6.43614	2.60007e-30	1.31167e-29	-6.22245	7.49953e-27	2.56042e-26	-6.2985	3.08973e-30	1.28193e-29	-6.49033	3.95786e-61	1.33189e-60
ENSG00000108700	CCL8	-5.29011	1.40778e-37	5.98e-37	-5.25236	1.11025e-38	5.36654e-38	-5.18149	7.63318e-35	3.01772e-34	-5.14506	6.61659e-27	2.63504e-26	-5.16555	1.16579e-28	4.45631e-28	-5.22319	2.59063e-28	9.59569e-28	-5.26451	1.39808e-91	9.18796e-91
ENSG00000108788	MLX	-2.02854	2.84694e-37	1.19102e-36	-2.2239	1.07417e-40	5.81672e-40	-2.8069	4.33556e-48	3.75233e-47	-2.68229	2.40999e-35	1.7872e-34	-2.74526	1.24241e-38	9.66089e-38	-2.37613	1.23077e-38	9.37884e-38	-2.63008	3.21041e-75	1.48749e-74
ENSG00000108798	ABI3	-5.2977	2.24488e-62	4.32701e-61	-4.47524	6.49884e-46	4.85003e-45	-4.77705	1.15213e-52	1.3734e-51	-4.34969	3.30448e-36	2.62459e-35	-4.55082	3.07183e-41	2.97267e-40	-4.17506	2.21281e-35	1.30236e-34	-4.56487	5.85873e-109	5.6735e-108
ENSG00000108825	PTGES3L-AARSD1	-3.16735	1.05008e-74	5.43955e-73	-3.16685	1.48913e-77	8.32613e-76	-3.16185	1.17637e-71	6.82102e-70	-3.1597	2.22297e-56	1.32159e-54	-3.16493	2.25968e-59	1.31566e-57	-3.15834	2.87385e-57	1.47783e-55	-3.16761	7.40219e-182	4.57442e-180
ENSG00000108961	RANGRF	-3.35614	1.68782e-61	3.0411e-60	-3.34709	1.79092e-63	4.08979e-62	-3.29924	4.13163e-56	6.24621e-55	-3.30822	7.9619e-46	1.60033e-44	-3.36137	1.29568e-47	2.25662e-46	-3.27254	8.49178e-46	1.23096e-44	-3.71127	6.3831e-161	2.24284e-159
ENSG00000109321	AREG	-2.96244	1.67935e-21	3.50134e-21	-2.93081	5.82384e-22	1.28476e-21	-2.80469	5.44682e-19	1.07502e-18	-2.85608	3.71655e-15	7.64247e-15	-2.87198	4.44687e-16	8.81368e-16	-2.87007	2.75271e-15	5.22402e-15	-2.92253	1.60308e-50	4.36135e-50
ENSG00000109861	CTSC	-5.50153	3.80789e-82	3.50675e-80	-4.86569	9.58356e-61	1.83219e-59	-4.42576	1.63061e-63	4.49615e-62	-4.39866	8.71565e-50	2.65809e-48	-4.35851	6.9052e-49	1.35696e-47	-4.49298	2.02802e-54	7.36465e-53	-5.3204	4.56575e-171	2.16604e-169
ENSG00000110031	LPXN	-4.12793	6.74793e-53	7.05329e-52	-3.85044	9.0862e-57	1.34621e-55	-2.56634	3.51342e-44	2.3329e-43	-2.72911	2.25061e-37	1.99065e-36	-2.74349	2.86958e-39	2.35196e-38	-2.64969	2.56033e-38	1.88874e-37	-4.20975	2.07922e-131	3.53819e-130
ENSG00000110057	UNC93B1	-4.21538	4.44944e-41	2.27394e-40	-3.69406	3.14258e-37	1.40836e-36	-4.07549	8.10126e-40	4.2074e-39	-3.8111	1.29852e-28	5.81385e-28	-3.90981	1.14362e-31	5.30928e-31	-3.67543	2.394e-28	8.89073e-28	-3.30143	2.24856e-75	1.04631e-74
ENSG00000110077	MS4A6A	-4.8419	1.50481e-45	9.91708e-45	-4.14505	3.84677e-31	1.26786e-30	-3.90009	1.51933e-31	5.06204e-31	-3.83295	2.40181e-24	8.13303e-24	-3.68087	6.75488e-24	1.96402e-23	-3.93777	6.83227e-27	2.31633e-26	-4.80192	5.45159e-93	3.69827e-92
ENSG00000110079	MS4A4A	-5.84704	6.95043e-59	1.0553e-57	-5.21131	2.49263e-42	1.48818e-41	-4.78845	1.38788e-41	7.94603e-41	-4.85054	1.04828e-34	7.32292e-34	-4.72435	2.40493e-34	1.3565e-33	-4.95299	6.47399e-39	5.03136e-38	-5.76052	4.87776e-125	7.03456e-124
ENSG00000110108	TMEM109	-2.16618	7.91263e-37	3.23813e-36	-2.56974	1.01025e-41	5.77928e-41	-3.49001	1.5274e-46	1.19033e-45	-3.20064	1.52708e-31	8.343e-31	-3.35944	2.73564e-38	2.06677e-37	-2.71079	8.2193e-33	4.04223e-32	-2.87454	3.46909e-76	1.64025e-75
ENSG00000110324	IL10RA	-6.01371	2.37185e-73	1.11028e-71	-5.30565	4.08967e-54	5.04143e-53	-5.20414	2.93532e-63	7.86286e-62	-4.98925	2.47973e-43	3.84796e-42	-5.03881	1.8897e-44	2.43951e-43	-5.05353	4.18572e-49	8.33005e-48	-5.76746	2.05644e-147	5.40584e-146
ENSG00000110536	PTPMT1	-3.42295	2.68742e-62	5.14481e-61	-3.40484	1.4908e-63	3.41551e-62	-2.77118	8.41264e-51	8.71574e-50	-2.79683	1.61451e-39	1.73785e-38	-2.84999	5.06389e-44	6.2919e-43	-2.9268	6.8456e-44	8.13962e-43	-3.74342	6.67071e-157	2.14101e-155
ENSG00000110719	TCIRG1	-4.91155	1.32806e-66	3.53731e-65	-4.50346	2.70106e-52	2.9756e-51	-4.97638	7.48953e-61	1.65403e-59	-4.64989	1.66844e-39	1.79179e-38	-4.87665	1.99023e-44	2.56094e-43	-4.4509	1.09916e-42	1.16708e-41	-4.22545	3.04305e-98	2.31891e-97
ENSG00000110848	CD69	-7.19078	2.30911e-58	3.38526e-57	-7.02351	3.32508e-57	5.0869e-56	-6.63394	1.04168e-50	1.07525e-49	-6.6796	5.25214e-39	5.42144e-38	-6.55285	3.67621e-38	2.75081e-37	-6.86977	6.54317e-43	7.07003e-42	-7.20752	6.67383e-142	1.49736e-140
ENSG00000110876	SELPLG	-8.23595	3.37652e-59	5.22804e-58	-7.12124	5.7663e-49	5.16182e-48	-7.62535	9.85951e-55	1.35664e-53	-7.21921	1.74813e-39	1.87167e-38	-7.20547	1.21458e-42	1.34013e-41	-6.80828	1.05118e-40	9.47607e-40	-7.65466	1.66581e-112	1.76476e-111
ENSG00000110934	BIN2	-6.20455	4.01339e-71	1.54928e-69	-5.62233	7.92032e-62	1.62916e-60	-5.81507	3.273e-64	9.81203e-63	-5.69433	3.34413e-49	9.65549e-48	-5.68858	1.33837e-51	3.4857e-50	-5.65948	7.39133e-52	2.00277e-50	-5.92256	2.69114e-147	7.00891e-146
ENSG00000111229	ARPC3	-3.26925	7.2238e-70	2.50698e-68	-2.56575	3.53081e-47	2.83309e-46	-3.1591	7.92581e-58	1.37361e-56	-3.22604	1.59595e-48	4.32441e-47	-3.14542	9.39854e-52	2.47524e-50	-3.17776	1.32178e-47	2.23845e-46	-3.09001	2.72646e-81	1.42863e-80
ENSG00000111231	GPN3	-3.23086	4.47778e-45	2.87565e-44	-3.52723	6.98935e-49	6.21717e-48	-3.38143	1.03466e-44	7.1288e-44	-3.49599	3.29312e-36	2.61704e-35	-3.45763	1.38273e-39	1.16107e-38	-3.52985	2.67207e-40	2.32404e-39	-4.31921	2.48976e-110	2.48271e-109
ENSG00000111325	OGFOD2	-2.06523	3.01044e-41	1.5526e-40	-2.31432	7.32517e-48	6.14721e-47	-2.20978	4.03144e-41	2.26487e-40	-2.16411	1.5157e-31	8.28402e-31	-2.20939	1.58201e-34	9.02815e-34	-2.18255	5.80098e-33	2.89023e-32	-2.40854	5.38393e-114	5.90807e-113
ENSG00000111335	OAS2	-2.88571	1.46758e-43	8.65919e-43	-2.55732	4.82211e-32	1.66406e-31	-2.57613	8.91154e-34	3.30953e-33	-2.40893	2.06193e-23	6.57148e-23	-2.42197	3.97969e-27	1.3842e-26	-2.26815	3.58185e-24	1.04187e-23	-2.79656	3.60461e-83	1.96628e-82
ENSG00000111348	ARHGDIB	-6.81458	1.17281e-63	2.46273e-62	-5.40369	7.25968e-49	6.44949e-48	-6.30964	2.87784e-62	7.15147e-61	-5.92445	2.57928e-44	4.48115e-43	-5.97913	1.22184e-49	2.60844e-48	-5.62024	5.87896e-49	1.15853e-47	-5.83757	6.95719e-119	8.56129e-118
ENSG00000111679	PTPN6	-5.52733	1.27643e-77	8.44361e-76	-5.2189	3.99857e-62	8.35903e-61	-5.43374	1.87348e-69	9.00931e-68	-5.19281	1.30785e-49	3.90416e-48	-5.34642	1.07199e-56	4.85668e-55	-5.07177	4.2641e-52	1.17806e-50	-5.30385	9.36616e-142	2.07499e-140
ENSG00000111725	PRKAB1	-2.2262	1.89738e-40	9.4068e-40	-2.50573	4.34832e-46	3.27811e-45	-2.44705	2.23592e-42	1.33946e-41	-2.37169	2.29434e-34	1.55944e-33	-2.43053	1.70784e-36	1.12028e-35	-2.43873	1.21461e-36	7.87207e-36	-2.61374	7.90063e-84	4.36207e-83
ENSG00000111729	CLEC4A	-4.00148	1.50025e-55	1.83176e-54	-4.08995	1.7124e-57	2.67491e-56	-3.4085	4.62541e-45	3.24724e-44	-3.4735	1.15302e-35	8.77754e-35	-3.32845	3.56157e-36	2.27173e-35	-3.57691	1.32751e-38	1.00834e-37	-4.2394	1.87106e-131	3.19167e-130
ENSG00000111780	AL021546.6	-5.85007	5.13174e-92	1.14772e-89	-5.85007	1.64919e-95	3.46823e-93	-5.85007	1.60378e-88	3.89607e-86	-5.85007	7.74644e-70	1.91487e-67	-5.85007	2.39078e-73	5.43324e-71	-5.85007	5.22921e-71	1.13353e-68	-5.85007	4.46117e-223	1.04763e-220
ENSG00000111859	NEDD9	-3.78901	5.49206e-53	5.7835e-52	-3.25584	1.78677e-43	1.13917e-42	-2.70597	6.13938e-41	3.41373e-40	-2.58355	7.5003e-30	3.64409e-29	-2.69681	3.29689e-32	1.59468e-31	-2.56279	2.67607e-29	1.04738e-28	-3.37781	7.96457e-97	5.86315e-96
ENSG00000112149	CD83	-6.08417	4.76832e-60	7.83826e-59	-6.61269	4.11697e-56	5.86533e-55	-6.51464	2.37345e-60	4.97648e-59	-6.71073	9.8881e-47	2.19753e-45	-6.71584	5.66538e-51	1.36921e-49	-6.7324	2.10382e-48	3.91583e-47	-6.96258	1.84035e-101	1.51022e-100
ENSG00000112299	VNN1	-2.39894	7.92927e-20	1.55973e-19	-2.3723	3.08285e-20	6.37004e-20	-2.16978	2.49521e-16	4.47639e-16	-2.18645	7.41729e-13	1.36829e-12	-2.12493	2.38353e-12	4.04309e-12	-2.27699	4.28566e-14	7.72581e-14	-2.46231	8.28127e-51	2.27187e-50
ENSG00000112303	VNN2	-3.02046	5.74718e-22	1.22138e-21	-2.78614	1.56368e-19	3.14881e-19	-2.49899	7.9443e-15	1.36025e-14	-2.50264	3.6264e-12	6.47441e-12	-2.36996	3.55546e-10	5.57867e-10	-2.59765	1.4905e-13	2.62121e-13	-3.06002	1.67813e-55	5.04585e-55
ENSG00000112343	TRIM38	-4.21187	7.14837e-74	3.53406e-72	-3.7205	9.01444e-53	1.01692e-51	-3.39506	4.01568e-58	7.17121e-57	-3.31711	1.6151e-38	1.58694e-37	-3.20761	1.18571e-38	9.2353e-38	-3.48846	5.86957e-48	1.03378e-46	-3.73114	2.72957e-125	3.99373e-124
ENSG00000112759	SLC29A1	-2.26538	2.47842e-35	9.47395e-35	-2.74468	4.96074e-38	2.32834e-37	-2.94274	1.00576e-39	5.19473e-39	-2.84644	3.56286e-28	1.54654e-27	-3.06839	2.98674e-33	1.55231e-32	-2.57567	1.2524e-29	4.9947e-29	-2.72086	4.55006e-46	1.13449e-45
ENSG00000112799	LY86	-6.5481	9.32155e-66	2.30019e-64	-5.4749	7.45685e-48	6.24655e-47	-5.59709	1.50606e-58	2.79951e-57	-5.43867	7.4658e-46	1.50276e-44	-5.27384	9.05161e-44	1.09474e-42	-5.48083	3.76987e-48	6.77519e-47	-6.19356	1.2843e-123	1.78459e-122
ENSG00000113070	HBEGF	-2.06001	3.47596e-15	5.80494e-15	-2.17372	3.33243e-14	5.55537e-14	-2.59099	6.10266e-19	1.20244e-18	-2.26664	2.59987e-12	4.67011e-12	-2.49937	4.70286e-15	8.89679e-15	-2.23404	4.28777e-12	7.13279e-12	-2.67174	1.52797e-46	3.8438e-46
ENSG00000113532	ST8SIA4	-4.15902	6.58785e-70	2.29759e-68	-3.35848	1.46917e-54	1.86492e-53	-2.56182	8.1319e-45	5.62211e-44	-2.60205	2.56057e-36	2.05692e-35	-2.50095	4.82885e-37	3.30765e-36	-2.68101	3.9626e-40	3.4003e-39	-3.88918	1.61399e-152	4.73772e-151
ENSG00000113732	ATP6V0E1	-3.46076	3.16604e-58	4.60842e-57	-2.80273	1.52752e-43	9.77862e-43	-3.1822	2.14353e-51	2.31258e-50	-3.19216	2.5671e-38	2.46898e-37	-2.95069	1.19926e-35	7.40475e-35	-3.22819	2.00249e-44	2.52145e-43	-3.31513	9.46393e-92	6.24282e-91
ENSG00000113889	KNG1	-2.81574	9.99147e-75	5.21407e-73	-2.76894	1.66681e-75	8.07055e-74	-2.64628	2.94901e-63	7.88456e-62	-2.66078	2.05847e-50	6.7608e-49	-2.73814	4.71349e-57	2.19911e-55	-2.69008	1.0836e-53	3.59246e-52	-2.71745	6.11052e-162	2.20197e-160
ENSG00000114013	CD86	-6.7227	2.90965e-77	1.85507e-75	-6.08725	2.91563e-55	3.88292e-54	-5.8903	4.18749e-66	1.54051e-64	-5.8377	1.04453e-48	2.89144e-47	-5.65146	1.3228e-48	2.54621e-47	-5.86262	1.39389e-54	5.16839e-53	-6.62675	1.92706e-170	8.93169e-169
ENSG00000114395	CYB561D2	-3.31845	1.58994e-70	5.91088e-69	-3.21646	6.27389e-53	7.15203e-52	-2.96249	5.04653e-59	9.71388e-58	-2.91247	8.5966e-50	2.62746e-48	-2.85154	8.30844e-52	2.20049e-50	-2.89699	1.91486e-51	4.92341e-50	-3.12004	2.57077e-107	2.4036e-106
ENSG00000114738	MAPKAPK3	-3.228	1.2151e-52	1.24154e-51	-2.56722	1.17641e-45	8.61522e-45	-2.86453	2.90853e-53	3.62665e-52	-2.58591	1.18625e-37	1.07903e-36	-2.73085	9.86965e-47	1.5893e-45	-2.43396	6.66075e-40	5.59964e-39	-2.79045	6.89814e-94	4.77381e-93
ENSG00000114786	ABHD14A-ACY1	-3.5451	1.3562e-63	2.83513e-62	-3.74116	7.79631e-70	2.65338e-68	-3.6751	5.06269e-63	1.33084e-61	-3.66166	1.10814e-49	3.34787e-48	-3.67222	2.18609e-52	6.1481e-51	-3.69184	5.65782e-51	1.36974e-49	-3.7545	1.40426e-163	5.34757e-162
ENSG00000114978	MOB1A	-2.48237	5.12882e-47	3.67949e-46	-2.75312	2.96163e-45	2.11395e-44	-2.17689	1.32535e-44	9.06512e-44	-2.20725	1.42883e-31	7.82439e-31	-2.06052	3.29988e-30	1.39166e-29	-2.25146	5.25516e-34	2.81862e-33	-3.4754	9.37586e-122	1.24276e-120
ENSG00000115008	IL1A	-5.39909	2.44619e-48	1.90952e-47	-5.21388	4.05421e-48	3.44742e-47	-5.13447	3.5619e-44	2.36397e-43	-5.12245	1.94309e-34	1.32968e-33	-5.10582	4.25405e-36	2.70242e-35	-5.16521	1.45083e-35	8.66928e-35	-5.40416	2.64715e-118	3.20709e-117
ENSG00000115009	CCL20	-3.32368	1.16521e-22	2.53948e-22	-3.23766	8.31661e-22	1.8227e-21	-3.25943	3.59395e-21	7.70522e-21	-3.25936	1.79997e-16	3.91987e-16	-3.22931	4.48585e-17	9.29222e-17	-3.25961	1.312e-16	2.6311e-16	-3.29193	2.22286e-53	6.39839e-53
ENSG00000115165	CYTIP	-3.99708	3.27044e-58	4.75547e-57	-3.76956	6.91328e-49	6.15339e-48	-3.4115	6.00601e-46	4.49414e-45	-3.33356	8.2979e-34	5.40284e-33	-3.2672	5.13655e-29	2.00593e-28	-3.49487	7.9485e-39	6.12996e-38	-3.96875	4.70657e-133	8.37317e-132
ENSG00000115318	LOXL3	-4.07131	2.785e-62	5.31717e-61	-3.88732	6.92273e-57	1.03657e-55	-3.82105	7.37541e-55	1.02789e-53	-3.65874	2.46585e-40	2.87139e-39	-3.65761	1.32942e-43	1.58608e-42	-3.64895	2.12997e-41	2.0319e-40	-4.04762	3.91735e-132	6.83112e-131
ENSG00000115325	DOK1	-3.99404	9.93805e-57	1.31357e-55	-3.45982	8.33167e-50	7.89995e-49	-4.11265	1.88154e-54	2.5345e-53	-3.83508	1.54683e-38	1.52199e-37	-3.87914	3.5519e-41	3.41613e-40	-3.51957	6.70658e-40	5.6348e-39	-3.48767	3.42642e-94	2.38765e-93
ENSG00000115523	GNLY	-2.47474	1.04695e-18	1.97476e-18	-2.26062	4.94802e-15	8.48869e-15	-2.59379	2.93663e-19	5.86243e-19	-2.43452	1.69896e-13	3.22663e-13	-2.64979	3.77772e-16	7.50855e-16	-2.5722	2.47653e-15	4.71353e-15	-2.11527	2.68371e-30	5.01039e-30
ENSG00000115541	HSPE1	-3.35649	1.01743e-40	5.09801e-40	-3.01108	1.33011e-40	7.15587e-40	-3.48725	2.15869e-40	1.16269e-39	-3.50883	9.87039e-29	4.45036e-28	-3.29356	1.91906e-34	1.08767e-33	-3.41895	5.5648e-32	2.56823e-31	-3.57771	5.41847e-85	3.06489e-84
ENSG00000115590	IL1R2	-2.43456	5.83265e-14	9.38687e-14	-2.30049	3.50591e-13	5.65781e-13	-2.04372	1.12695e-09	1.63851e-09	-2.0278	1.22687e-07	1.8086e-07	-2.03242	7.7971e-08	1.11898e-07	-2.1945	4.89029e-09	7.28067e-09	-2.37437	2.49682e-30	4.66333e-30
ENSG00000115738	ID2	-3.77639	5.99975e-38	2.60032e-37	-2.61234	6.70847e-28	1.8878e-27	-2.80068	1.17309e-30	3.74042e-30	-2.8554	6.16911e-24	2.03423e-23	-2.87167	4.73292e-26	1.54403e-25	-2.87767	5.37572e-26	1.72813e-25	-3.35771	1.3021e-56	4.0181e-56
ENSG00000115956	PLEK	-6.9333	5.21183e-66	1.33034e-64	-6.20851	7.88822e-52	8.41371e-51	-5.94171	1.06991e-56	1.69382e-55	-5.89023	5.90994e-42	7.99914e-41	-5.69674	1.29696e-41	1.3053e-40	-5.89948	5.13647e-44	6.191e-43	-6.78781	1.50482e-140	3.21257e-139
ENSG00000116455	WDR77	-3.16898	2.38662e-48	1.86405e-47	-3.02552	4.14842e-55	5.47296e-54	-2.40004	3.00655e-49	2.81103e-48	-2.42551	1.27837e-40	1.54083e-39	-2.33065	2.92255e-41	2.84187e-40	-2.44365	2.46566e-43	2.77707e-42	-3.54497	3.05981e-109	2.98565e-108
ENSG00000116679	IVNS1ABP	-2.31636	2.43541e-35	9.31459e-35	-2.68147	3.21757e-35	1.30725e-34	-2.58146	8.80383e-43	5.39096e-42	-2.59569	4.1908e-32	2.38965e-31	-2.41963	4.91234e-32	2.34865e-31	-2.69887	5.95755e-36	3.67843e-35	-3.71436	7.48889e-102	6.20332e-101
ENSG00000116701	NCF2	-5.07956	2.65452e-57	3.63129e-56	-4.48624	1.91548e-42	1.14847e-41	-4.05967	8.61196e-43	5.27806e-42	-3.98117	1.22874e-32	7.33597e-32	-3.89684	1.37618e-31	6.36374e-31	-4.15039	3.53974e-37	2.39899e-36	-4.95897	4.42592e-119	5.47028e-118
ENSG00000116711	PLA2G4A	-4.56522	6.84501e-53	7.14416e-52	-3.77072	2.79738e-41	1.55976e-40	-3.21068	4.55867e-38	2.13821e-37	-3.19816	1.54938e-29	7.36778e-29	-3.11673	1.81527e-31	8.33405e-31	-3.34058	1.13595e-33	5.95446e-33	-4.56596	6.061e-120	7.68672e-119
ENSG00000116741	RGS2	-5.65405	5.14097e-49	4.18465e-48	-5.50891	4.0513e-47	3.23783e-46	-5.44164	6.70629e-44	4.38884e-43	-5.68511	8.13045e-40	9.06313e-39	-5.68473	1.12265e-39	9.50606e-39	-5.63314	5.46599e-32	2.52511e-31	-6.13225	2.88009e-89	1.79084e-88
ENSG00000116774	OLFML3	-7.39375	4.60213e-72	1.94727e-70	-6.65778	1.46318e-57	2.29835e-56	-6.55361	8.69486e-62	2.06595e-60	-6.24075	3.83604e-45	7.14e-44	-6.4048	1.30625e-50	3.05224e-49	-6.04609	5.67014e-50	1.23291e-48	-6.98012	4.52617e-143	1.04376e-141
ENSG00000116815	CD58	-4.75353	2.76961e-55	3.34968e-54	-4.32882	1.96625e-49	1.81788e-48	-4.02391	3.03894e-47	2.48512e-46	-4.08792	3.66033e-35	2.67085e-34	-3.93729	1.43303e-34	8.21125e-34	-4.24806	4.91206e-40	4.18952e-39	-4.62778	2.13065e-114	2.36199e-113
ENSG00000117448	AKR1A1	-2.76683	4.1308e-46	2.81446e-45	-2.68856	1.41403e-46	1.09291e-45	-2.82812	3.62495e-49	3.36466e-48	-2.84082	1.14592e-43	1.85161e-42	-2.89287	1.68443e-44	2.19553e-43	-2.7448	4.0201e-42	4.08093e-41	-2.71697	2.21645e-64	8.02205e-64
ENSG00000117676	RPS6KA1	-2.97393	1.04639e-47	7.87169e-47	-3.89755	1.45929e-48	1.28029e-47	-4.15298	6.78173e-56	1.0133e-54	-3.79471	8.53597e-40	9.50765e-39	-3.90069	3.83781e-44	4.83674e-43	-3.70004	9.87799e-41	8.94478e-40	-4.25053	3.99109e-125	5.79139e-124
ENSG00000117984	CTSD	-3.21754	8.15658e-43	4.58421e-42	-2.57764	2.14972e-37	9.73003e-37	-3.8156	2.65332e-42	1.58412e-41	-3.25742	2.74927e-30	1.38595e-29	-3.67834	2.44167e-34	1.37612e-33	-2.67025	1.75673e-32	8.43063e-32	-2.11009	1.73778e-46	4.36615e-46
ENSG00000118292	C1orf54	-2.12333	1.73319e-27	4.58776e-27	-2.13929	1.18578e-30	3.81017e-30	-2.44381	1.18394e-32	4.15795e-32	-2.47663	5.16764e-26	1.94945e-25	-2.39391	3.36098e-28	1.24327e-27	-2.7098	3.71279e-30	1.53142e-29	-2.03192	2.45008e-51	6.77958e-51
ENSG00000118308	LRMP	-4.51753	6.21455e-56	7.78338e-55	-3.30814	2.78501e-39	1.39251e-38	-2.4433	3.64041e-32	1.2468e-31	-2.78015	1.46336e-27	6.11108e-27	-2.5529	8.19694e-27	2.79175e-26	-2.91997	3.24803e-31	1.43239e-30	-3.75899	1.91845e-95	1.36935e-94
ENSG00000118503	TNFAIP3	-5.77942	8.00387e-58	1.13455e-56	-5.37407	4.49334e-51	4.56791e-50	-5.22278	4.27498e-49	3.9498e-48	-5.0373	5.35391e-35	3.85274e-34	-5.01741	1.70041e-36	1.11644e-35	-5.06673	3.17262e-38	2.32946e-37	-5.60279	1.93647e-112	2.04534e-111
ENSG00000118508	RAB32	-4.18958	1.14356e-51	1.08796e-50	-3.44756	2.04841e-46	1.56944e-45	-3.5032	1.31636e-41	7.55191e-41	-3.41828	2.42856e-30	1.22823e-29	-3.36857	6.36348e-32	3.0189e-31	-3.41991	4.15504e-34	2.24912e-33	-3.93345	1.14971e-100	9.25681e-100
ENSG00000118515	SGK1	-6.22019	3.51108e-69	1.15317e-67	-5.27559	5.32589e-43	3.28698e-42	-5.42899	9.50592e-55	1.31184e-53	-5.20425	9.93403e-41	1.20664e-39	-5.06167	1.0317e-42	1.14372e-41	-5.21066	8.91424e-41	8.10334e-40	-6.28069	2.52539e-132	4.42023e-131
ENSG00000118640	VAMP8	-4.94358	2.86587e-60	4.79004e-59	-3.98747	6.40347e-39	3.12955e-38	-4.99256	2.01564e-57	3.39311e-56	-4.79121	1.60584e-39	1.72983e-38	-4.8742	3.15968e-45	4.42104e-44	-4.61585	3.59063e-40	3.09621e-39	-4.20892	2.23137e-85	1.27649e-84
ENSG00000118705	RPN2	-3.06128	8.49943e-57	1.13085e-55	-3.22284	6.7072e-56	9.38476e-55	-3.05564	3.56401e-62	8.80998e-61	-3.01204	1.84301e-41	2.40444e-40	-2.89556	2.46477e-49	5.10715e-48	-2.94742	2.00378e-48	3.74943e-47	-3.77593	2.04649e-107	1.92106e-106
ENSG00000118707	TGIF2	-2.28226	1.12079e-36	4.55228e-36	-2.24365	2.26057e-37	1.02121e-36	-2.36897	2.94741e-34	1.12667e-33	-2.21824	3.90331e-25	1.39235e-24	-2.25785	2.10688e-27	7.43821e-27	-2.11594	7.22518e-26	2.30845e-25	-2.18054	1.01853e-71	4.34224e-71
ENSG00000118785	SPP1	-7.92058	5.15356e-43	2.93864e-42	-5.54295	1.90643e-27	5.24435e-27	-6.43144	9.15062e-39	4.48772e-38	-5.95614	1.6355e-27	6.79568e-27	-6.00187	1.59223e-28	6.03889e-28	-5.7195	4.07044e-27	1.3985e-26	-7.50072	3.30916e-75	1.53073e-74
ENSG00000118855	MFSD1	-4.34123	6.21348e-55	7.37556e-54	-4.05414	1.89655e-56	2.7464e-55	-3.27752	1.03265e-55	1.52356e-54	-3.42816	3.64694e-42	5.04273e-41	-3.19201	5.4153e-43	6.10901e-42	-3.65903	2.21291e-54	7.99486e-53	-4.82003	2.28698e-122	3.08655e-121
ENSG00000118894	FAM86A	-2.25104	5.81632e-52	5.66358e-51	-2.1997	4.52072e-55	5.95856e-54	-2.28353	1.9124e-48	1.68727e-47	-2.13766	2.41037e-37	2.12131e-36	-2.24765	6.50895e-41	6.12633e-40	-2.09961	2.0421e-39	1.6438e-38	-2.23457	3.62543e-105	3.21475e-104
ENSG00000118939	UCHL3	-3.08486	6.43794e-60	1.04626e-58	-3.12824	3.7315e-62	7.85903e-61	-2.43171	1.62145e-41	9.26074e-41	-2.57146	5.24339e-36	4.09986e-35	-2.3684	9.34874e-36	5.83365e-35	-2.76872	6.39879e-43	6.94064e-42	-3.36478	1.26651e-141	2.79705e-140
ENSG00000119508	NR4A3	-3.35174	3.09213e-33	1.06419e-32	-2.95106	1.61404e-23	3.78841e-23	-2.57453	1.63879e-24	3.9825e-24	-2.72128	3.2425e-21	9.12276e-21	-2.50205	1.96035e-20	4.75984e-20	-2.63126	2.35616e-17	4.87565e-17	-3.34781	3.7384e-56	1.14063e-55
ENSG00000119535	CSF3R	-5.57091	1.01417e-58	1.52831e-57	-4.77465	3.75828e-44	2.49784e-43	-5.22306	2.63651e-53	3.29038e-52	-5.00065	9.44035e-39	9.46049e-38	-4.99725	6.08755e-41	5.7412e-40	-5.00037	1.62229e-40	1.44397e-39	-5.11914	1.28806e-110	1.29449e-109
ENSG00000119655	NPC2	-4.58406	4.36198e-59	6.70964e-58	-3.54317	4.6588e-44	3.07171e-43	-4.2064	6.02981e-52	6.8241e-51	-3.89227	1.54334e-35	1.16349e-34	-3.89101	3.20261e-38	2.40665e-37	-3.56327	9.74458e-40	8.07179e-39	-4.09893	9.86651e-106	8.87167e-105
ENSG00000119725	ZNF410	-3.3021	5.75599e-75	3.04895e-73	-3.51787	4.97408e-82	3.61262e-80	-2.92906	6.15322e-58	1.08482e-56	-2.99473	1.84189e-46	4.00497e-45	-2.87675	6.16932e-49	1.21405e-47	-3.22765	7.77341e-52	2.09822e-50	-3.38139	2.13247e-177	1.16459e-175
ENSG00000120129	DUSP1	-2.77891	4.59707e-32	1.49212e-31	-3.15917	2.40735e-28	6.91812e-28	-3.39423	1.92862e-32	6.70639e-32	-3.20938	3.47224e-26	1.32263e-25	-3.47412	1.41714e-24	4.26837e-24	-2.85183	2.3751e-26	7.8153e-26	-3.35142	1.59074e-52	4.49889e-52
ENSG00000120217	CD274	-2.41746	3.36168e-24	7.77386e-24	-2.70804	1.93604e-31	6.46419e-31	-2.13187	1.68357e-21	3.66696e-21	-2.24064	2.36612e-17	5.38414e-17	-2.20758	4.03056e-18	8.75182e-18	-2.40224	5.62975e-21	1.38507e-20	-2.89961	5.62328e-74	2.52976e-73
ENSG00000120280	CXorf21	-5.73387	4.19445e-76	2.43557e-74	-5.3723	1.42414e-64	3.51421e-63	-5.26854	7.08248e-66	2.52638e-64	-5.22372	6.53697e-51	2.27985e-49	-5.16749	1.64547e-51	4.24626e-50	-5.31258	1.29291e-54	4.80661e-53	-5.48878	1.25305e-154	3.88031e-153
ENSG00000120337	TNFSF18	-5.09957	1.07697e-45	7.17474e-45	-4.89646	4.44865e-44	2.94141e-43	-4.26734	2.50303e-36	1.06807e-35	-4.40816	1.48422e-29	7.07707e-29	-4.35559	1.42522e-30	6.15236e-30	-4.55574	1.39348e-31	6.28695e-31	-4.99798	3.02727e-108	2.89967e-107
ENSG00000120690	ELF1	-4.32981	4.98761e-56	6.29708e-55	-3.70638	4.99861e-43	3.09177e-42	-3.68325	5.72078e-48	4.91798e-47	-3.39013	4.2619e-33	2.62228e-32	-3.34685	4.15265e-34	2.29634e-33	-3.37319	3.17521e-36	2.00442e-35	-4.59935	2.79607e-119	3.48334e-118
ENSG00000120738	EGR1	-3.4125	9.85594e-25	2.32147e-24	-2.19278	5.28381e-14	8.74018e-14	-3.1259	4.02916e-26	1.05287e-25	-2.86556	3.56785e-19	8.97856e-19	-3.06465	2.2768e-24	6.78227e-24	-2.94052	1.77913e-17	3.69569e-17	-2.27079	4.69623e-15	6.78527e-15
ENSG00000120889	TNFRSF10B	-4.02315	1.43353e-52	1.45104e-51	-3.29836	7.16218e-44	4.67416e-43	-3.54419	5.04229e-50	4.96824e-49	-3.30911	2.56469e-35	1.89494e-34	-3.3574	3.61816e-37	2.50762e-36	-3.42732	1.41363e-37	9.87511e-37	-3.39984	1.16639e-92	7.84459e-92
ENSG00000121064	SCPEP1	-3.05212	1.09078e-47	8.18373e-47	-2.62161	3.7184e-43	2.32338e-42	-2.80258	2.0242e-50	2.05269e-49	-2.75441	7.81106e-38	7.21218e-37	-2.52392	5.9376e-37	4.03574e-36	-2.79166	1.66816e-41	1.60989e-40	-2.71264	2.53511e-53	7.29123e-53
ENSG00000121281	ADCY7	-4.86162	7.33251e-66	1.85153e-64	-4.31433	7.54533e-58	1.20811e-56	-4.05641	1.38814e-52	1.64222e-51	-3.79014	6.81438e-38	6.33342e-37	-3.90512	1.38782e-42	1.52293e-41	-3.66121	2.27903e-39	1.82295e-38	-4.71833	5.09226e-146	1.2632e-144
ENSG00000121316	PLBD1	-4.32446	3.74512e-50	3.26135e-49	-4.08001	1.05437e-46	8.23051e-46	-3.89406	8.39719e-42	4.86099e-41	-3.77369	1.58053e-29	7.51084e-29	-3.84569	6.38309e-33	3.24217e-32	-3.86457	1.02029e-34	5.74806e-34	-4.31961	2.17542e-118	2.64695e-117
ENSG00000121716	PILRB	-2.12458	1.11911e-18	2.10918e-18	-3.19478	2.25116e-36	9.74166e-36	-3.05861	1.32437e-33	4.87597e-33	-2.79307	4.87609e-23	1.52506e-22	-2.93197	5.14747e-27	1.77627e-26	-3.09548	7.97091e-28	2.86652e-27	-2.83925	1.29937e-46	3.27692e-46
ENSG00000121797	CCRL2	-4.02361	8.29121e-53	8.59626e-52	-3.87816	9.37879e-52	9.94335e-51	-3.81487	2.98425e-47	2.44182e-46	-3.77505	1.84122e-36	1.49785e-35	-3.82829	1.08735e-39	9.21824e-39	-3.81334	3.97168e-38	2.88905e-37	-3.95151	9.05311e-125	1.29896e-123
ENSG00000121858	TNFSF10	-3.41153	2.9845e-42	1.62111e-41	-2.93838	1.92661e-33	7.11745e-33	-2.72712	8.52742e-31	2.72947e-30	-2.50326	6.67891e-22	1.95484e-21	-2.57222	9.86656e-24	2.8383e-23	-2.55049	1.75373e-23	4.91156e-23	-3.15699	6.00109e-70	2.45586e-69
ENSG00000121895	TMEM156	-4.8916	2.58109e-54	2.8909e-53	-4.53537	4.01171e-49	3.63271e-48	-4.4206	1.7332e-47	1.44246e-46	-4.35517	2.77417e-36	2.22344e-35	-4.20005	4.02486e-36	2.56144e-35	-4.49502	1.20217e-38	9.17086e-38	-4.71288	9.67533e-122	1.28125e-120
ENSG00000121933	ADORA3	-7.45976	7.09611e-72	2.94071e-70	-6.36853	6.28721e-57	9.44925e-56	-6.73912	4.64598e-63	1.22588e-61	-6.51042	6.0064e-48	1.54435e-46	-6.57218	6.53817e-51	1.56405e-49	-6.57398	8.52791e-49	1.65965e-47	-6.97635	3.38928e-141	7.40388e-140
ENSG00000121966	CXCR4	-5.63641	7.68858e-46	5.15622e-45	-5.11676	3.91246e-35	1.5841e-34	-5.82336	2.84116e-45	2.02488e-44	-5.63316	6.26986e-33	3.81444e-32	-5.46426	9.40188e-30	3.84759e-29	-5.32277	1.029e-33	5.42002e-33	-5.97283	2.81291e-95	2.00273e-94
ENSG00000122122	SASH3	-6.17694	5.5284e-74	2.76354e-72	-5.49362	4.81254e-53	5.56721e-52	-5.46332	2.56601e-64	7.82578e-63	-5.15527	1.11756e-45	2.19922e-44	-5.26373	9.91214e-50	2.12899e-48	-4.97864	2.39233e-46	3.62842e-45	-5.98634	3.16705e-141	6.92914e-140
ENSG00000122861	PLAU	-4.59339	8.25e-45	5.21267e-44	-4.4305	8.35784e-45	5.78399e-44	-4.35783	3.25008e-40	1.73198e-39	-4.27325	6.99105e-31	3.64829e-30	-4.37503	5.59428e-33	2.85489e-32	-4.30037	1.92017e-32	9.18685e-32	-4.4357	1.28366e-104	1.12271e-103
ENSG00000122862	SRGN	-6.46312	7.64078e-45	4.83641e-44	-5.59613	1.64197e-33	6.08346e-33	-5.34113	2.73133e-42	1.62932e-41	-5.3195	2.52317e-32	1.46604e-31	-5.24628	5.67801e-31	2.51582e-30	-5.45213	1.05769e-35	6.39059e-35	-6.7514	1.20974e-83	6.65831e-83
ENSG00000122877	EGR2	-7.94858	1.78851e-75	9.92132e-74	-7.49966	1.07357e-55	1.47433e-54	-7.54175	6.99349e-61	1.54691e-59	-7.50506	1.87412e-53	8.51819e-52	-7.61345	2.05356e-57	9.94319e-56	-7.41598	1.60276e-41	1.54996e-40	-7.61463	6.13505e-123	8.36814e-122
ENSG00000122986	HVCN1	-2.94771	6.76116e-37	2.77416e-36	-3.28502	2.93179e-40	1.54715e-39	-3.43862	8.34952e-45	5.76973e-44	-3.16603	2.94493e-26	1.12817e-25	-3.27275	5.13361e-32	2.44863e-31	-3.19579	1.4976e-33	7.79217e-33	-3.35555	1.16181e-89	7.32764e-89
ENSG00000123329	ARHGAP9	-2.71066	2.95586e-33	1.01879e-32	-3.3664	7.06246e-46	5.24842e-45	-3.13696	5.17478e-41	2.88878e-40	-3.02518	1.75595e-30	8.96751e-30	-3.36484	5.75885e-35	3.39223e-34	-3.14872	7.08466e-33	3.50379e-32	-3.04417	1.06651e-85	6.14607e-85
ENSG00000123338	NCKAP1L	-4.77128	1.85395e-71	7.33768e-70	-4.16038	4.76481e-49	4.28711e-48	-3.87164	1.07837e-58	2.03675e-57	-3.69945	8.95025e-40	9.93767e-39	-3.56709	3.8476e-42	4.04267e-41	-3.70678	2.96509e-43	3.31572e-42	-4.48235	6.30202e-143	1.45091e-141
ENSG00000123342	MMP19	-2.43958	1.94744e-24	4.54145e-24	-2.46199	1.46131e-25	3.71926e-25	-2.32319	6.71375e-22	1.48434e-21	-2.3058	8.67664e-17	1.92708e-16	-2.37428	1.34634e-18	2.99494e-18	-2.35176	9.76503e-18	2.05664e-17	-2.43303	4.5413e-60	1.49887e-59
ENSG00000123353	ORMDL2	-3.62632	3.09072e-70	1.11093e-68	-3.74671	3.50915e-78	2.06879e-76	-3.54815	6.89661e-70	3.44586e-68	-3.46195	1.78115e-48	4.79855e-47	-3.42905	5.04299e-54	1.75446e-52	-3.48313	3.39931e-57	1.73537e-55	-4.20869	1.25584e-195	1.11288e-193
ENSG00000123358	NR4A1	-6.8116	1.12915e-53	1.22665e-52	-6.34107	1.28849e-48	1.13326e-47	-6.83873	3.18616e-54	4.21531e-53	-6.51698	2.06001e-38	2.00453e-37	-6.76549	1.82546e-44	2.36186e-43	-6.24054	2.70395e-37	1.85124e-36	-6.22057	4.99565e-80	2.54202e-79
ENSG00000123416	TUBA1B	-4.62067	4.84849e-45	3.10524e-44	-3.50315	1.173e-31	3.9625e-31	-3.04319	6.47668e-48	5.55088e-47	-3.15184	5.20955e-35	3.75653e-34	-3.21428	3.83305e-37	2.65394e-36	-2.80918	2.67117e-32	1.26383e-31	-4.9963	1.55152e-57	4.8688e-57
ENSG00000123609	NMI	-2.95152	4.74252e-50	4.11213e-49	-2.57137	1.66674e-40	8.89894e-40	-2.70123	6.12934e-44	4.0206e-43	-2.62455	1.4345e-32	8.49963e-32	-2.54788	4.00433e-33	2.06217e-32	-2.7194	3.99799e-36	2.50252e-35	-2.79756	4.96957e-94	3.45443e-93
ENSG00000123689	G0S2	-3.32245	1.59123e-14	2.59978e-14	-3.68364	2.6385e-18	5.08361e-18	-3.73245	2.68089e-19	5.35646e-19	-3.59789	3.29755e-14	6.4657e-14	-3.74072	3.24915e-15	6.19325e-15	-3.59844	1.3441e-14	2.47658e-14	-3.34805	5.09555e-31	9.63709e-31
ENSG00000123975	CKS2	-3.38626	2.60146e-22	5.59954e-22	-3.6422	9.7197e-31	3.13675e-30	-3.89794	2.69491e-30	8.47005e-30	-4.17112	2.02946e-27	8.36848e-27	-4.14649	2.01254e-31	9.2097e-31	-4.15783	1.14339e-22	3.0745e-22	-4.4201	6.17856e-67	2.36244e-66
ENSG00000124103	FAM209A	-3.71616	2.9833e-72	1.27765e-70	-3.83255	5.35141e-78	3.09022e-76	-3.79998	1.47113e-69	7.14767e-68	-3.81822	1.79463e-55	9.76304e-54	-3.82832	2.47229e-58	1.31451e-56	-3.82137	6.59748e-57	3.2617e-55	-3.81666	1.79939e-176	9.71397e-175
ENSG00000124208	TMEM189-UBE2V1	-4.99267	8.37557e-97	3.68787e-94	-4.99267	1.79729e-100	7.0344e-98	-4.99267	3.92013e-93	1.72608e-90	-4.99267	1.63263e-73	7.18869e-71	-4.99267	3.36414e-77	1.43639e-74	-4.99267	9.63247e-75	3.77004e-72	-4.99267	1.80542e-234	7.48185e-232
ENSG00000124333	VAMP7	-4.33677	1.5962e-72	6.94151e-71	-4.33654	2.67967e-75	1.28862e-73	-4.33617	9.86927e-70	4.89641e-68	-4.33696	7.0567e-55	3.6156e-53	-4.33696	1.13165e-57	5.57517e-56	-4.33696	8.25099e-56	3.48073e-54	-4.33696	1.17945e-176	6.39174e-175
ENSG00000124593	PRICKLE4	-2.34924	3.30968e-48	2.5665e-47	-2.39085	9.93735e-51	9.89521e-50	-2.61263	1.17055e-52	1.39417e-51	-2.44548	4.1766e-36	3.29497e-35	-2.51536	8.84005e-44	1.07099e-42	-2.49344	5.30421e-40	4.51034e-39	-2.40264	7.34555e-95	5.16977e-94
ENSG00000124614	RPS10	-3.44291	1.69166e-68	5.27335e-67	-3.09172	2.58112e-53	3.0408e-52	-3.54349	3.75299e-59	7.26368e-58	-3.65374	2.2811e-50	7.4228e-49	-3.58317	3.14811e-52	8.72596e-51	-3.76777	3.96114e-58	2.29681e-56	-3.63627	7.07283e-127	1.0797e-125
ENSG00000124731	TREM1	-3.67875	1.79762e-35	6.91846e-35	-3.60741	3.93668e-35	1.59344e-34	-3.55706	3.05735e-32	1.05325e-31	-3.54986	2.16176e-25	7.86654e-25	-3.5871	7.16515e-27	2.44922e-26	-3.61568	1.85074e-26	6.13286e-26	-3.65767	1.78019e-85	1.02004e-84
ENSG00000124762	CDKN1A	-6.14909	2.89016e-42	1.57168e-41	-5.50939	5.68401e-36	2.40793e-35	-6.04612	1.86629e-41	1.06289e-40	-5.59189	4.11602e-30	2.04856e-29	-5.84371	4.16626e-32	1.99941e-31	-5.40801	8.06227e-30	3.26523e-29	-5.33396	6.53313e-53	1.86189e-52
ENSG00000125089	SH3TC1	-4.53013	2.26154e-61	4.03355e-60	-3.88917	6.01362e-45	4.20714e-44	-3.9001	3.15949e-46	2.41155e-45	-3.60112	1.71976e-32	1.01048e-31	-3.80367	1.07899e-37	7.74079e-37	-3.61383	9.19467e-35	5.1925e-34	-3.95721	5.59895e-101	4.53126e-100
ENSG00000125257	ABCC4	-3.81025	1.44444e-56	1.89323e-55	-3.20351	9.40747e-44	6.08312e-43	-2.24097	3.28565e-36	1.39191e-35	-2.24342	6.05784e-25	2.13547e-24	-2.04436	6.42857e-25	1.96824e-24	-2.30328	5.15912e-28	1.87786e-27	-3.64174	3.0337e-121	3.98368e-120
ENSG00000125434	SLC25A35	-2.43856	2.37385e-48	1.8551e-47	-2.23295	5.45417e-43	3.36321e-42	-2.51733	9.28439e-46	6.86704e-45	-2.42474	4.08946e-36	3.22804e-35	-2.47769	2.6157e-39	2.14899e-38	-2.44862	9.7981e-38	6.92701e-37	-2.15062	3.5947e-90	2.30224e-89
ENSG00000125454	SLC25A19	-2.37601	1.07538e-38	4.84092e-38	-2.45409	4.72441e-35	1.90355e-34	-2.49657	1.3646e-37	6.23854e-37	-2.46873	3.18349e-30	1.59628e-29	-2.47022	2.98832e-30	1.26291e-29	-2.54016	2.20903e-30	9.2387e-30	-2.66219	4.03687e-81	2.10821e-80
ENSG00000125457	MIF4GD	-2.67615	1.41526e-45	9.36195e-45	-2.52036	1.9974e-38	9.49825e-38	-3.14281	1.29953e-47	1.0925e-46	-2.84427	1.64373e-34	1.13252e-33	-2.91879	3.49219e-37	2.42389e-36	-2.6778	4.25509e-34	2.30151e-33	-2.64867	8.42115e-86	4.86088e-85
ENSG00000125538	IL1B	-7.96992	6.81872e-60	1.10305e-58	-7.56846	2.91356e-54	3.63293e-53	-7.6817	1.28767e-56	2.02492e-55	-7.61882	2.6885e-45	5.10459e-44	-7.57148	5.62286e-46	8.38372e-45	-7.61273	2.95484e-45	4.11807e-44	-7.86902	9.85223e-124	1.37853e-122
ENSG00000125695	RP11-51F16.8	-4.509	2.16843e-89	3.59449e-87	-4.509	8.69752e-93	1.39259e-90	-4.509	5.42972e-86	9.32985e-84	-4.509	8.04149e-68	1.38176e-65	-4.509	3.09778e-71	5.32289e-69	-4.509	5.84472e-69	9.46576e-67	-4.509	7.93757e-217	1.4157e-214
ENSG00000125730	C3	-7.99532	1.41084e-54	1.61092e-53	-6.38626	2.87208e-40	1.51621e-39	-6.19468	1.81125e-50	1.84397e-49	-5.6732	2.29159e-35	1.70388e-34	-5.58335	7.29494e-40	6.26742e-39	-5.40485	1.84345e-34	1.0214e-33	-7.2092	5.80674e-97	4.29035e-96
ENSG00000125740	FOSB	-5.20921	6.13826e-57	8.24481e-56	-4.24049	1.38764e-33	5.1561e-33	-4.55745	7.56732e-36	3.14524e-35	-4.30096	3.51784e-28	1.52841e-27	-4.57917	2.97561e-31	1.34293e-30	-4.22905	1.15845e-23	3.27829e-23	-4.11846	1.82253e-47	4.67579e-47
ENSG00000125954	CHURC1-FNTB	-4.80468	4.3574e-98	2.36137e-95	-4.80468	8.39084e-102	3.9409e-99	-4.80468	2.27269e-94	1.23162e-91	-4.80468	1.68643e-74	9.13917e-72	-4.80468	3.1183e-78	1.62729e-75	-4.80468	9.59707e-76	4.66285e-73	-4.80468	1.59125e-237	8.30398e-235
ENSG00000126246	IGFLR1	-3.86133	6.3085e-75	3.31667e-73	-3.87792	1.08728e-74	5.05605e-73	-3.92848	4.72693e-70	2.39577e-68	-3.89614	5.36732e-56	3.11216e-54	-3.93336	1.13842e-59	6.79676e-58	-3.94519	7.19066e-58	3.98884e-56	-3.95593	4.83061e-177	2.62793e-175
ENSG00000126264	HCST	-6.82273	2.21251e-94	7.08506e-92	-6.62389	8.7203e-86	8.30196e-84	-6.42826	2.60835e-75	2.00829e-73	-6.34945	5.97567e-56	3.43662e-54	-6.3988	8.67811e-60	5.24783e-58	-6.14164	1.65261e-56	7.58477e-55	-6.56621	2.5e-168	1.09735e-166
ENSG00000126561	STAT5A	-2.02518	2.94115e-34	1.06614e-33	-2.38745	4.28909e-35	1.73211e-34	-2.59586	5.09194e-38	2.37962e-37	-2.27025	6.40156e-25	2.25157e-24	-2.47642	1.83504e-29	7.40217e-29	-2.27487	1.02471e-27	3.66636e-27	-2.554	9.87319e-79	4.90353e-78
ENSG00000126749	EMG1	-2.66511	1.87566e-60	3.17263e-59	-2.80033	8.82654e-66	2.35541e-64	-2.37307	1.47177e-52	1.73678e-51	-2.39127	2.12087e-42	3.0003e-41	-2.28117	1.23459e-44	1.62573e-43	-2.49169	3.22933e-45	4.48289e-44	-3.20956	2.44494e-140	5.2038e-139
ENSG00000127084	FGD3	-4.13538	2.27764e-50	2.00946e-49	-3.78222	1.97121e-47	1.60824e-46	-3.72055	3.36758e-43	2.11449e-42	-3.60894	2.40998e-32	1.40201e-31	-3.63877	8.92359e-35	5.17421e-34	-3.60991	7.83823e-34	4.17072e-33	-3.88363	4.86157e-112	5.05532e-111
ENSG00000127774	EMC6	-4.02409	2.30995e-70	8.41012e-69	-4.16743	4.08481e-79	2.52434e-77	-4.03595	1.8544e-64	5.75517e-63	-4.1125	2.05267e-53	9.26989e-52	-4.15316	2.83793e-57	1.36008e-55	-4.07092	2.46e-54	8.8425e-53	-4.4786	5.64907e-172	2.74467e-170
ENSG00000127951	FGL2	-2.84177	1.47163e-20	2.966e-20	-4.08012	2.1764e-37	9.84131e-37	-2.99616	4.19652e-30	1.30961e-29	-3.12757	8.72166e-29	3.94504e-28	-2.86174	1.02332e-25	3.29117e-25	-3.15816	1.23653e-29	4.93839e-29	-5.04973	2.74101e-144	6.57935e-143
ENSG00000128016	ZFP36	-6.77746	1.95519e-42	1.07402e-41	-6.29903	1.79081e-38	8.55049e-38	-8.01681	2.13774e-49	2.01473e-48	-7.42956	3.92365e-37	3.39583e-36	-7.65494	4.04302e-39	3.26641e-38	-6.97528	1.88526e-41	1.80826e-40	-6.13663	6.16349e-52	1.72104e-51
ENSG00000128340	RAC2	-3.7437	1.13323e-43	6.72303e-43	-3.06939	6.94849e-30	2.15623e-29	-3.50411	1.96108e-38	9.42739e-38	-3.31313	4.97361e-28	2.13523e-27	-3.38802	2.50294e-31	1.13689e-30	-3.1375	1.16584e-27	4.16183e-27	-3.24607	5.79494e-74	2.60615e-73
ENSG00000128604	IRF5	-5.4187	1.31932e-67	3.80148e-66	-4.94176	7.79887e-61	1.50118e-59	-5.09509	5.6432e-61	1.25811e-59	-4.86907	8.97912e-46	1.79201e-44	-4.90713	3.49671e-49	7.15076e-48	-4.7083	7.40632e-46	1.07916e-44	-5.15555	3.95697e-138	7.95345e-137
ENSG00000128805	ARHGAP22	-2.64926	6.38504e-34	2.27185e-33	-2.16188	9.07202e-27	2.42368e-26	-2.40463	1.99206e-30	6.29612e-30	-2.06738	1.07091e-19	2.77781e-19	-2.16963	8.58167e-23	2.34651e-22	-2.04455	1.55774e-20	3.7455e-20	-2.2577	2.01732e-64	7.31069e-64
ENSG00000128815	WDFY4	-3.19018	1.13325e-57	1.59038e-56	-2.85904	4.04799e-47	3.23701e-46	-2.46094	3.83764e-42	2.26339e-41	-2.28024	1.98571e-28	8.77073e-28	-2.2374	1.81097e-29	7.30715e-29	-2.27914	2.40967e-29	9.47594e-29	-3.14457	1.91653e-137	3.80337e-136
ENSG00000129084	PSMA1	-3.684	9.83114e-67	2.65365e-65	-3.79299	2.4181e-70	8.58214e-69	-3.11626	5.13753e-45	3.5996e-44	-3.42829	3.23325e-39	3.40482e-38	-3.31127	7.34367e-46	1.0756e-44	-3.70621	2.24888e-49	4.59228e-48	-3.93761	1.18745e-109	1.16838e-108
ENSG00000129226	CD68	-7.96227	5.73916e-94	1.68468e-91	-8.18063	5.63806e-103	3.17761e-100	-8.22211	1.29334e-95	8.6777e-93	-8.20097	3.45055e-75	2.31516e-72	-8.23012	2.01791e-79	1.29238e-76	-8.2037	1.78407e-76	1.07948e-73	-8.20377	3.20959e-238	1.78227e-235
ENSG00000129450	SIGLEC9	-4.83412	9.26037e-68	2.72398e-66	-4.35707	4.7766e-45	3.36512e-44	-4.45709	2.86258e-54	3.80148e-53	-4.26617	1.80029e-40	2.12446e-39	-4.30535	1.03741e-42	1.14914e-41	-4.23527	1.91829e-40	1.69565e-39	-4.67772	2.84516e-110	2.8291e-109
ENSG00000129465	RIPK3	-3.14003	1.53137e-67	4.38558e-66	-3.06396	2.39903e-65	6.23658e-64	-3.04808	2.4537e-57	4.09629e-56	-3.00163	3.00386e-47	7.11334e-46	-3.09746	1.21853e-52	3.54001e-51	-3.01682	1.89384e-49	3.92994e-48	-3.08752	4.71022e-152	1.36558e-150
ENSG00000129534	MIS18BP1	-3.99305	3.84342e-44	2.34839e-43	-3.60365	1.23905e-39	6.32088e-39	-2.31531	2.41271e-26	6.35779e-26	-2.45391	6.40549e-21	1.77559e-20	-2.33096	1.8503e-21	4.71357e-21	-2.89151	3.20337e-26	1.04529e-25	-3.92223	1.21115e-104	1.0606e-103
ENSG00000129667	RHBDF2	-5.4567	1.21894e-70	4.57995e-69	-4.63981	3.61429e-51	3.70636e-50	-5.12106	1.65834e-61	3.84942e-60	-4.71902	5.49591e-41	6.79872e-40	-4.84726	4.04265e-47	6.74893e-46	-4.51643	8.16235e-42	8.11627e-41	-4.5607	1.02185e-99	8.0256e-99
ENSG00000130066	SAT1	-5.76336	1.87568e-64	4.14888e-63	-5.29896	9.97679e-59	1.67949e-57	-5.42981	1.15472e-58	2.17805e-57	-5.54569	1.42912e-46	3.14629e-45	-5.33204	5.7137e-47	9.38298e-46	-5.86282	2.042e-49	4.21256e-48	-5.62309	1.1031e-118	1.35389e-117
ENSG00000130208	APOC1	-5.25399	1.99488e-46	1.38326e-45	-4.11333	3.26211e-33	1.19416e-32	-4.33518	6.93124e-36	2.88853e-35	-3.88878	1.33827e-23	4.31295e-23	-3.60701	1.25402e-21	3.21374e-21	-4.13967	1.78278e-27	6.28928e-27	-4.28064	2.34334e-70	9.68542e-70
ENSG00000130300	PLVAP	-6.14434	1.71662e-71	6.85189e-70	-5.56642	2.42777e-61	4.85899e-60	-5.83932	2.05417e-60	4.33282e-59	-5.67245	6.93944e-45	1.2649e-43	-5.83588	2.12529e-53	6.94788e-52	-5.65116	9.2357e-49	1.78751e-47	-5.63927	5.02801e-137	9.83953e-136
ENSG00000130303	BST2	-3.79452	3.49953e-40	1.71567e-39	-2.22896	2.56685e-22	5.72986e-22	-3.84582	2.89731e-40	1.54868e-39	-3.34634	4.65776e-24	1.54783e-23	-3.44808	1.7729e-30	7.60433e-30	-2.89304	7.4963e-30	3.03863e-29	-2.08596	1.84104e-30	3.44768e-30
ENSG00000130429	ARPC1B	-5.60138	3.28742e-73	1.52368e-71	-5.00276	2.9318e-59	5.11884e-58	-5.26224	3.09636e-67	1.27941e-65	-4.96922	1.04343e-46	2.31163e-45	-5.1431	6.82493e-51	1.62713e-49	-4.9253	2.26416e-49	4.61173e-48	-4.94929	5.5398e-128	8.67286e-127
ENSG00000130592	LSP1	-2.94265	7.42498e-28	1.99805e-27	-2.53453	7.71258e-22	1.69295e-21	-2.76733	1.07175e-24	2.629e-24	-2.62512	6.23038e-18	1.46432e-17	-2.74652	4.20926e-20	1.00649e-19	-2.58579	4.19102e-18	8.9812e-18	-2.66891	7.79162e-54	2.26545e-53
ENSG00000130755	GMFG	-4.83486	1.81171e-56	2.35924e-55	-3.60426	3.1811e-43	1.99296e-42	-4.17335	1.25065e-48	1.11813e-47	-4.13545	6.16821e-37	5.25136e-36	-4.03481	1.86611e-37	1.31995e-36	-4.12295	2.44393e-38	1.81046e-37	-3.63099	1.01152e-92	6.81602e-92
ENSG00000130775	THEMIS2	-5.44783	3.6565e-69	1.19814e-67	-4.12163	1.97916e-40	1.05271e-39	-4.26376	2.11079e-58	3.84251e-57	-3.96248	2.33937e-42	3.29288e-41	-4.05279	1.13085e-42	1.24872e-41	-4.03054	1.45862e-44	1.87176e-43	-4.48431	1.10634e-112	1.17559e-111
ENSG00000130810	PPAN	-2.32847	5.81675e-48	4.45182e-47	-2.418	4.94952e-56	7.00892e-55	-2.65845	4.32272e-50	4.28019e-49	-2.48131	1.07596e-40	1.30467e-39	-2.61606	1.20607e-41	1.21643e-40	-2.37076	7.97e-41	7.27314e-40	-2.77651	3.39976e-115	3.82303e-114
ENSG00000130812	ANGPTL6	-2.39323	7.1041e-61	1.23424e-59	-2.38283	3.85718e-64	9.19462e-63	-2.24199	2.99092e-52	3.44862e-51	-2.20083	5.26427e-38	4.95481e-37	-2.3076	6.31781e-47	1.03269e-45	-2.2541	6.01059e-43	6.55489e-42	-2.25836	2.81091e-114	3.1039e-113
ENSG00000131042	LILRB2	-3.61246	1.01664e-36	4.14242e-36	-3.37564	3.31234e-34	1.26857e-33	-3.44851	1.55707e-32	5.43992e-32	-3.40484	1.81244e-25	6.6176e-25	-3.47185	1.62689e-27	5.77547e-27	-3.44949	1.11715e-26	3.73797e-26	-3.40179	1.29205e-73	5.73749e-73
ENSG00000131236	CAP1	-3.24037	8.92065e-58	1.25818e-56	-2.51594	1.35128e-44	9.17568e-44	-2.70452	9.30074e-55	1.28478e-53	-2.62765	1.26816e-39	1.37767e-38	-2.59124	1.52089e-44	1.99715e-43	-2.43766	3.26723e-40	2.82772e-39	-3.27025	1.00104e-95	7.19991e-95
ENSG00000131238	PPT1	-3.45535	1.63248e-50	1.45857e-49	-3.36478	6.97788e-45	4.85763e-44	-3.42992	1.38169e-56	2.16551e-55	-3.58158	1.43098e-41	1.88788e-40	-3.52679	2.06348e-47	3.52417e-46	-3.54998	5.13403e-45	7.00954e-44	-4.25913	3.654e-84	2.03096e-83
ENSG00000131401	NAPSB	-4.70195	1.55772e-30	4.72819e-30	-4.59876	9.30432e-26	2.39011e-25	-4.70292	6.11858e-27	1.65663e-26	-4.57255	1.70944e-20	4.62303e-20	-4.53818	2.64061e-21	6.67494e-21	-4.48914	7.3135e-20	1.70467e-19	-4.82786	9.77864e-59	3.14784e-58
ENSG00000131503	ANKHD1	-3.35406	1.03257e-67	3.00598e-66	-3.5706	1.15531e-74	5.33715e-73	-2.93092	1.20453e-54	1.64935e-53	-3.10404	6.70444e-46	1.35922e-44	-2.86707	5.31423e-44	6.58554e-43	-3.35587	1.04566e-51	2.75905e-50	-3.37328	4.17273e-152	1.21475e-150
ENSG00000131652	THOC6	-2.36719	9.9932e-41	5.01261e-40	-2.47801	5.83868e-47	4.63215e-46	-3.01221	1.55923e-50	1.592e-49	-2.75058	6.2493e-37	5.31398e-36	-3.03451	4.72267e-43	5.37499e-42	-2.68174	6.2596e-42	6.2685e-41	-2.22072	1.17377e-66	4.459e-66
ENSG00000131669	NINJ1	-4.48624	4.05476e-59	6.25757e-58	-4.15924	1.25504e-57	1.98023e-56	-5.2831	3.56004e-65	1.18304e-63	-4.80073	8.69926e-47	1.93944e-45	-4.93973	1.39163e-49	2.94416e-48	-4.37471	6.84501e-54	2.31842e-52	-4.09125	1.51017e-125	2.22809e-124
ENSG00000131724	IL13RA1	-4.49408	1.28128e-45	8.50367e-45	-3.47369	5.80052e-32	1.9934e-31	-3.41336	1.33124e-40	7.26261e-40	-3.17284	4.45e-27	1.79349e-26	-3.06381	1.68176e-26	5.6392e-26	-3.13365	3.13088e-29	1.22031e-28	-4.24191	3.54402e-89	2.19689e-88
ENSG00000132002	DNAJB1	-3.8561	5.89269e-19	1.12215e-18	-4.16597	1.03007e-30	3.31969e-30	-5.2345	5.58117e-39	2.77092e-38	-4.99866	9.23927e-31	4.7896e-30	-5.15948	1.98333e-34	1.1232e-33	-4.60446	3.51319e-25	1.07963e-24	-4.48763	5.3171e-58	1.68355e-57
ENSG00000132109	TRIM21	-3.48764	2.71416e-53	2.89278e-52	-3.13512	1.53123e-45	1.1104e-44	-3.08693	7.69905e-46	5.72452e-45	-2.95209	1.86394e-32	1.09292e-31	-2.95286	2.54182e-34	1.43028e-33	-2.79819	4.01047e-36	2.50921e-35	-3.19371	1.34796e-91	8.86269e-91
ENSG00000132274	TRIM22	-5.43982	4.1503e-67	1.15341e-65	-4.46002	2.39397e-48	2.06939e-47	-3.76879	8.13418e-48	6.92511e-47	-3.89814	4.55572e-36	3.58604e-35	-3.59899	9.46366e-35	5.47609e-34	-3.98178	1.37497e-42	1.44793e-41	-5.06563	1.16618e-116	1.35573e-115
ENSG00000132522	GPS2	-4.14701	4.2912e-73	1.96309e-71	-4.44165	6.67145e-88	7.28687e-86	-4.43062	9.89939e-80	1.08126e-77	-4.34681	2.8985e-58	2.06262e-56	-4.40104	1.81522e-66	2.02988e-64	-4.32972	1.68666e-61	1.3737e-59	-4.63927	1.95341e-203	2.27468e-201
ENSG00000132530	XAF1	-3.52255	2.78475e-45	1.809e-44	-2.89285	2.15262e-33	7.93991e-33	-2.74323	7.51944e-33	2.66739e-32	-2.68301	2.40177e-24	8.13303e-24	-2.59582	2.6431e-24	7.8568e-24	-2.77521	5.8425e-28	2.12167e-27	-2.58862	9.69519e-61	3.23632e-60
ENSG00000132661	NXT1	-2.34139	1.81853e-41	9.469e-41	-2.65829	3.09518e-52	3.4018e-51	-2.8179	9.26156e-46	6.85735e-45	-2.82396	1.44243e-33	9.22137e-33	-2.83266	1.94871e-39	1.61324e-38	-2.8679	4.93357e-40	4.20532e-39	-2.50697	3.85631e-79	1.93158e-78
ENSG00000132744	ACY3	-6.14694	3.15499e-47	2.3033e-46	-5.51425	5.99821e-40	3.11518e-39	-5.72946	1.77311e-40	9.60149e-40	-5.71093	4.43918e-32	2.52719e-31	-5.54609	6.35606e-33	3.22961e-32	-5.39577	2.87831e-30	1.19632e-29	-5.69524	1.93331e-83	1.06118e-82
ENSG00000132965	ALOX5AP	-7.48923	2.87728e-63	5.85005e-62	-6.41682	1.14718e-44	7.85413e-44	-6.48272	1.64358e-57	2.78342e-56	-6.40627	2.72271e-43	4.20647e-42	-6.18625	8.40032e-45	1.12617e-43	-6.2166	4.45568e-45	6.11896e-44	-7.3476	3.38037e-112	3.54122e-111
ENSG00000132967	HMGB1P5	-3.07208	4.25586e-54	4.72166e-53	-3.158	2.48928e-60	4.63327e-59	-3.91225	7.53906e-36	3.13627e-35	-3.74445	1.1235e-23	3.63911e-23	-3.94161	5.04858e-34	2.77435e-33	-4.03306	1.639e-35	9.7482e-35	-2.5001	1.85126e-84	1.03756e-83
ENSG00000133106	EPSTI1	-3.24327	4.06314e-56	5.16228e-55	-2.94542	1.28097e-44	8.72772e-44	-2.48671	7.99059e-38	3.68897e-37	-2.44704	5.17476e-29	2.38043e-28	-2.37334	2.5679e-29	1.02411e-28	-2.53971	2.34477e-31	1.0422e-30	-2.97478	1.94465e-104	1.69555e-103
ENSG00000133246	PRAM1	-3.22796	4.33602e-37	1.7969e-36	-3.08734	7.7337e-34	2.90969e-33	-3.72601	6.48752e-43	4.00391e-42	-3.52139	1.02358e-30	5.29064e-30	-3.62103	6.08738e-35	3.58126e-34	-3.51398	3.40468e-32	1.59641e-31	-2.81342	9.57193e-65	3.49039e-64
ENSG00000133574	GIMAP4	-4.89113	1.53391e-49	1.28878e-48	-3.96326	9.81881e-38	4.533e-37	-4.04813	2.29954e-41	1.30227e-40	-3.91848	9.17973e-30	4.43561e-29	-3.85006	3.30356e-33	1.70941e-32	-3.77482	3.08133e-33	1.56963e-32	-4.37097	1.9241e-91	1.26272e-90
ENSG00000133800	LYVE1	-5.8477	6.72835e-47	4.80013e-46	-4.87503	2.50054e-33	9.20393e-33	-4.2246	8.28114e-31	2.65185e-30	-4.3057	9.70573e-25	3.36169e-24	-4.18381	1.04979e-26	3.55311e-26	-4.31092	6.33928e-28	2.29674e-27	-5.58123	1.77934e-95	1.27199e-94
ENSG00000133983	COX16	-2.06021	2.35042e-47	1.73208e-46	-2.26137	2.34653e-57	3.62132e-56	-2.33322	7.09231e-57	1.13816e-55	-2.40167	1.1522e-42	1.69462e-41	-2.38945	1.06331e-46	1.70639e-45	-2.43494	5.79909e-44	6.95397e-43	-2.06062	6.88952e-86	3.98986e-85
ENSG00000134061	CD180	-3.9281	3.44953e-56	4.41051e-55	-3.58624	1.43745e-46	1.1104e-45	-3.52297	1.13566e-46	8.92437e-46	-3.39047	1.87675e-33	1.19007e-32	-3.33955	6.6806e-35	3.91066e-34	-3.4097	2.85176e-35	1.66382e-34	-3.85618	3.72202e-119	4.61243e-118
ENSG00000134070	IRAK2	-3.53923	1.34636e-40	6.70089e-40	-3.43854	2.98606e-39	1.48933e-38	-3.34569	1.09636e-37	5.03673e-37	-3.17987	1.03673e-28	4.66841e-28	-3.21577	1.41631e-29	5.74435e-29	-3.0679	4.28814e-29	1.65489e-28	-3.89759	8.57709e-94	5.92989e-93
ENSG00000134207	SYT6	-3.44177	7.40461e-69	2.36043e-67	-2.82556	1.92001e-54	2.4176e-53	-2.80965	2.19726e-52	2.55651e-51	-2.76849	1.94944e-42	2.76613e-41	-2.6893	8.2762e-41	7.71751e-40	-2.65207	2.98678e-42	3.04734e-41	-3.07759	1.18192e-134	2.1826e-133
ENSG00000134516	DOCK2	-4.80637	1.58397e-80	1.3206e-78	-4.39215	4.34028e-60	7.93185e-59	-3.77825	1.66297e-60	3.56098e-59	-3.6644	3.9504e-40	4.52529e-39	-3.52603	1.36513e-41	1.37292e-40	-3.7439	7.57294e-46	1.1023e-44	-4.74427	6.71677e-181	4.11475e-179
ENSG00000134802	SLC43A3	-3.48721	5.15066e-52	5.0293e-51	-3.63085	3.45278e-55	4.58095e-54	-3.74477	2.06102e-52	2.39998e-51	-3.6179	3.24624e-39	3.41595e-38	-3.63196	1.5057e-41	1.5057e-40	-3.61613	7.96303e-41	7.27149e-40	-3.65668	3.63512e-113	3.90984e-112
ENSG00000134955	SLC37A2	-3.69175	7.55624e-51	6.85119e-50	-3.45961	7.51432e-46	5.5666e-45	-3.28117	2.74644e-42	1.63763e-41	-3.16286	2.76845e-31	1.48883e-30	-3.15107	2.21693e-34	1.25297e-33	-3.18758	2.85356e-33	1.45887e-32	-3.58037	1.69566e-117	2.00267e-116
ENSG00000135047	CTSL	-2.837	3.71097e-42	2.00335e-41	-2.47565	3.70844e-33	1.35403e-32	-2.55946	3.0149e-34	1.15184e-33	-2.6579	3.36549e-29	1.56191e-28	-2.69222	9.30404e-31	4.06367e-30	-2.6666	1.38214e-28	5.19592e-28	-2.93279	1.07946e-61	3.67471e-61
ENSG00000135077	HAVCR2	-5.93907	2.05118e-73	9.63372e-72	-5.35377	6.17592e-53	7.04604e-52	-5.18221	1.66078e-63	4.56148e-62	-4.99751	6.5346e-46	1.32861e-44	-4.87468	3.43482e-47	5.76837e-46	-5.00521	2.32952e-48	4.31313e-47	-5.77034	3.21197e-143	7.4681e-142
ENSG00000135114	OASL	-3.27148	7.28606e-43	4.10971e-42	-3.22106	1.06065e-41	6.05778e-41	-3.10479	5.64523e-37	2.48877e-36	-3.05062	8.82449e-29	3.989e-28	-3.11261	6.83292e-31	3.00956e-30	-3.06564	2.25589e-30	9.4263e-30	-3.25184	3.52663e-91	2.30688e-90
ENSG00000135535	CD164	-2.74452	1.52516e-42	8.43055e-42	-2.58548	1.66435e-35	6.86093e-35	-2.25725	1.60518e-37	7.31466e-37	-2.34397	3.08039e-27	1.25296e-26	-2.20203	3.53835e-28	1.30648e-27	-2.41901	2.24801e-32	1.06792e-31	-3.73152	1.14442e-95	8.2186e-95
ENSG00000135604	STX11	-5.10097	9.7487e-57	1.28976e-55	-4.82991	6.78904e-52	7.26881e-51	-4.85012	3.00181e-50	3.01895e-49	-4.69038	2.78281e-36	2.2291e-35	-4.81931	1.2041e-40	1.10815e-39	-4.65068	2.45494e-38	1.81671e-37	-4.86918	1.52506e-114	1.69867e-113
ENSG00000135678	CPM	-3.81923	1.10799e-37	4.73079e-37	-2.36408	3.05872e-19	6.09753e-19	-2.76456	8.84437e-25	2.17672e-24	-2.45805	1.63134e-16	3.56144e-16	-2.37131	2.15503e-16	4.33281e-16	-2.3464	1.29711e-16	2.60197e-16	-2.70593	3.85968e-50	1.04302e-49
ENSG00000135838	NPL	-4.08503	1.62769e-46	1.13535e-45	-3.56536	1.79915e-42	1.08056e-41	-3.30998	2.48325e-45	1.77609e-44	-3.3581	9.78899e-34	6.34146e-33	-3.07925	7.05043e-32	3.33022e-31	-3.59595	1.54775e-37	1.07693e-36	-3.67478	3.44485e-93	2.34596e-92
ENSG00000135899	SP110	-3.67999	4.35417e-67	1.20768e-65	-3.48651	2.61819e-63	5.91191e-62	-3.4214	3.50078e-60	7.24317e-59	-3.3664	1.78959e-44	3.15192e-43	-3.28538	4.68845e-47	7.79013e-46	-3.42922	9.72028e-48	1.66414e-46	-3.48879	1.41409e-146	3.57071e-145
ENSG00000136161	RCBTB2	-3.09764	2.84317e-50	2.49753e-49	-3.06225	3.88482e-48	3.31138e-47	-2.87745	1.02356e-47	8.667e-47	-2.94412	3.44107e-36	2.72999e-35	-2.76843	3.86924e-37	2.67506e-36	-2.88829	2.5242e-40	2.20495e-39	-3.87364	1.39322e-113	1.5112e-112
ENSG00000136167	LCP1	-5.4047	1.36586e-39	6.47107e-39	-5.6075	3.53203e-44	2.35079e-43	-5.38037	1.02296e-51	1.12518e-50	-5.17746	4.30175e-37	3.71622e-36	-4.99463	3.03238e-38	2.28239e-37	-5.06805	6.23627e-41	5.7281e-40	-6.55033	3.40175e-123	4.66251e-122
ENSG00000136244	IL6	-2.60674	5.7268e-31	1.77342e-30	-2.3862	3.97468e-26	1.03614e-25	-2.51187	6.40245e-28	1.81583e-27	-2.42441	1.0422e-19	2.70583e-19	-2.48917	3.66687e-22	9.69346e-22	-2.4577	6.27241e-21	1.54049e-20	-2.43216	1.09385e-46	2.76307e-46
ENSG00000136250	AOAH	-6.15554	1.33526e-72	5.8428e-71	-5.84415	9.7673e-61	1.86479e-59	-5.30778	2.55392e-62	6.38028e-61	-5.17779	1.73993e-46	3.79498e-45	-4.99267	1.26866e-47	2.21231e-46	-5.26373	1.86485e-48	3.50811e-47	-6.15033	9.95017e-161	3.47886e-159
ENSG00000136315	RP11-84C10.2	-2.73368	2.42106e-29	6.99176e-29	-2.31784	4.63064e-19	9.17017e-19	-2.6259	9.19093e-26	2.3597e-25	-2.65713	7.96861e-21	2.19593e-20	-2.71296	3.35213e-23	9.35463e-23	-2.62356	3.95929e-20	9.34446e-20	-2.42795	2.19836e-36	4.58006e-36
ENSG00000136371	MTHFS	-3.1527	5.27326e-46	3.56698e-45	-3.49871	1.13217e-52	1.27009e-51	-2.63447	6.29785e-36	2.62846e-35	-2.85266	5.81354e-30	2.85709e-29	-2.68749	2.23267e-30	9.51842e-30	-2.92174	2.42896e-33	1.24951e-32	-3.55666	3.96091e-120	5.05519e-119
ENSG00000136404	TM6SF1	-5.81462	6.88195e-60	1.112e-58	-5.42934	1.99638e-57	3.10132e-56	-4.72576	2.204e-65	7.51921e-64	-4.95024	5.9581e-52	2.34496e-50	-4.9665	1.16644e-54	4.34791e-53	-4.93714	1.06509e-52	3.24127e-51	-5.80625	2.95627e-125	4.32094e-124
ENSG00000136630	HLX	-2.26998	4.87086e-45	3.11673e-44	-2.2424	9.63142e-45	6.63278e-44	-2.29279	6.8356e-42	3.9799e-41	-2.23942	9.57987e-32	5.32047e-31	-2.31046	1.5607e-35	9.56101e-35	-2.26267	1.38381e-34	7.74646e-34	-2.10436	4.68447e-92	3.11929e-91
ENSG00000136634	IL10	-4.88317	1.06574e-66	2.86569e-65	-4.76042	2.42755e-65	6.29912e-64	-4.63333	3.67362e-58	6.56869e-57	-4.64621	3.70886e-46	7.73046e-45	-4.67745	2.16966e-49	4.50892e-48	-4.69234	6.94459e-49	1.36091e-47	-4.86572	1.40088e-159	4.74481e-158
ENSG00000136689	IL1RN	-4.14295	2.13444e-34	7.79936e-34	-4.02979	8.52058e-33	3.05717e-32	-4.02472	1.30349e-31	4.3563e-31	-4.01339	9.1323e-25	3.17009e-24	-4.0877	9.08954e-27	3.08904e-26	-4.07008	1.11038e-25	3.51264e-25	-4.09606	1.60739e-81	8.45711e-81
ENSG00000136732	GYPC	-3.72411	2.08196e-54	2.35621e-53	-2.95403	3.64341e-39	1.80755e-38	-3.20068	1.19731e-45	8.78652e-45	-3.08668	9.5765e-32	5.32047e-31	-3.10222	1.58526e-32	7.85107e-32	-3.00702	1.24611e-38	9.49061e-38	-2.84076	9.48014e-83	5.11978e-82
ENSG00000136867	SLC31A2	-5.20131	2.29497e-60	3.85413e-59	-4.68127	1.04952e-46	8.19717e-46	-4.21801	4.38214e-46	3.32137e-45	-3.89924	2.29923e-33	1.4482e-32	-3.87587	3.80021e-35	2.26982e-34	-4.04936	4.51459e-35	2.59635e-34	-5.22834	8.87276e-142	1.96877e-140
ENSG00000136997	MYC	-2.98595	4.31375e-44	2.62551e-43	-2.73244	6.2221e-39	3.04619e-38	-2.73153	3.22751e-36	1.36851e-35	-2.52244	5.9381e-27	2.37288e-26	-2.73271	7.58381e-32	3.56781e-31	-2.27367	8.10213e-24	2.31278e-23	-2.86904	2.99018e-65	1.1035e-64
ENSG00000137076	TLN1	-2.55007	3.94697e-44	2.40957e-43	-2.74866	2.06922e-36	8.9681e-36	-2.71483	1.25051e-34	4.87538e-34	-2.17844	3.33613e-22	9.95257e-22	-2.35477	4.87301e-25	1.50638e-24	-2.00807	4.42288e-24	1.28148e-23	-2.96355	3.44009e-78	1.68829e-77
ENSG00000137161	CNPY3	-3.85323	8.6006e-56	1.06675e-54	-3.12918	4.80431e-51	4.87349e-50	-4.05806	7.46272e-53	9.03349e-52	-3.65554	1.18677e-38	1.1784e-37	-3.94052	2.5529e-42	2.72916e-41	-3.37244	3.43255e-43	3.81725e-42	-3.2057	4.2185e-91	2.75562e-90
ENSG00000137331	IER3	-6.05394	1.80402e-64	3.99664e-63	-5.34415	8.14528e-54	9.87667e-53	-6.09281	1.68071e-58	3.1037e-57	-5.73568	3.01937e-42	4.21634e-41	-5.98956	5.66441e-45	7.73368e-44	-5.44286	5.69924e-43	6.22498e-42	-5.3155	1.02858e-87	6.18025e-87
ENSG00000137462	TLR2	-5.18534	3.58655e-53	3.79673e-52	-4.72407	2.59265e-39	1.29863e-38	-3.92473	2.32931e-34	8.94763e-34	-4.01637	2.25628e-27	9.2658e-27	-3.6497	4.77181e-24	1.39781e-23	-4.20163	2.66824e-29	1.0449e-28	-5.32521	5.23754e-108	4.99303e-107
ENSG00000137491	SLCO2B1	-5.9594	2.5601e-54	2.86967e-53	-4.9384	1.28083e-42	7.74212e-42	-5.31213	3.09269e-54	4.09548e-53	-4.87891	4.85024e-39	5.02869e-38	-4.93773	1.70249e-42	1.85093e-41	-4.72004	1.93198e-42	2.00749e-41	-5.36285	4.28587e-110	4.24072e-109
ENSG00000137575	SDCBP	-2.85638	2.90236e-35	1.10675e-34	-2.81677	1.5491e-34	6.06973e-34	-2.96428	2.30711e-39	1.16764e-38	-3.15866	3.93253e-31	2.08855e-30	-2.99186	1.34902e-32	6.71648e-32	-3.19424	8.38089e-34	4.44939e-33	-3.46778	9.55599e-82	5.0523e-81
ENSG00000137752	CASP1	-4.6505	1.72305e-62	3.33028e-61	-4.23954	7.99596e-48	6.68227e-47	-4.45864	1.06701e-53	1.36426e-52	-4.28382	1.40266e-38	1.384e-37	-4.21405	2.65514e-40	2.36031e-39	-4.3314	3.275e-44	4.03364e-43	-4.73651	1.10319e-127	1.71947e-126
ENSG00000137767	SQRDL	-4.57452	7.58882e-61	1.31359e-59	-4.34116	2.11235e-64	5.14931e-63	-4.32308	5.48075e-61	1.22383e-59	-4.27751	4.33118e-45	8.0087e-44	-4.23864	2.90486e-45	4.08886e-44	-4.32752	2.06579e-49	4.24919e-48	-4.52777	1.28839e-139	2.70543e-138
ENSG00000137965	IFI44	-3.35654	8.60716e-37	3.51827e-36	-2.8192	7.04029e-28	1.97881e-27	-2.56346	4.38235e-26	1.14283e-25	-2.58935	5.85037e-20	1.53533e-19	-2.26328	8.37855e-17	1.7149e-16	-2.91846	2.43823e-26	8.01368e-26	-3.23833	9.30061e-63	3.25579e-62
ENSG00000137970	RPL7P9	-2.25645	5.42355e-44	3.28114e-43	-2.51462	1.35567e-49	1.26667e-48	-3.58859	5.13957e-58	9.13197e-57	-3.73397	1.5973e-52	6.63894e-51	-3.65878	3.94464e-51	9.71679e-50	-3.59818	3.79695e-54	1.33747e-52	-2.75916	9.592e-87	5.66197e-86
ENSG00000138085	ATRAID	-2.51758	2.03985e-42	1.11704e-41	-2.45166	1.13436e-45	8.31153e-45	-2.65837	1.38863e-47	1.16463e-46	-2.64637	4.03043e-35	2.93001e-34	-2.53085	2.07441e-34	1.17383e-33	-2.61324	2.4185e-40	2.11788e-39	-3.03287	2.68842e-103	2.29853e-102
ENSG00000138135	CH25H	-8.80831	3.90256e-66	1.00341e-64	-8.24724	1.68121e-58	2.78032e-57	-8.33728	2.41667e-65	8.1853e-64	-8.18667	7.18731e-51	2.49432e-49	-8.30095	4.58572e-54	1.60087e-52	-8.04888	9.31793e-51	2.19181e-49	-8.34795	6.91315e-131	1.16375e-129
ENSG00000138185	ENTPD1	-3.30016	2.04835e-65	4.88346e-64	-3.57052	2.15287e-76	1.11522e-74	-3.2329	1.23632e-63	3.44384e-62	-3.31786	9.63833e-49	2.68919e-47	-3.15218	5.95614e-49	1.17868e-47	-3.52556	5.3913e-58	3.07544e-56	-3.76276	2.87004e-176	1.54347e-174
ENSG00000138413	IDH1	-2.45299	1.36356e-49	1.1477e-48	-2.50281	4.98984e-43	3.0877e-42	-2.32535	2.40925e-43	1.52843e-42	-2.38115	9.08117e-33	5.47513e-32	-2.26479	5.94671e-34	3.25521e-33	-2.46416	6.79751e-38	4.86671e-37	-3.00251	5.00628e-105	4.42525e-104
ENSG00000138449	SLC40A1	-4.33517	7.69718e-40	3.69769e-39	-3.82896	4.16402e-36	1.77254e-35	-3.49621	3.87785e-35	1.55666e-34	-3.52455	2.04795e-25	7.46396e-25	-3.2483	2.00267e-24	5.98846e-24	-3.61543	9.13569e-30	3.68725e-29	-4.76298	5.03076e-105	4.4441e-104
ENSG00000138639	ARHGAP24	-3.97528	4.00331e-58	5.80316e-57	-2.91794	1.35396e-42	8.17366e-42	-2.35354	9.15282e-40	4.7326e-39	-2.52099	5.08745e-34	3.36536e-33	-2.48386	5.53462e-35	3.26424e-34	-2.62225	8.97597e-36	5.46785e-35	-3.18074	3.61412e-83	1.9707e-82
ENSG00000138722	MMRN1	-3.85307	1.20352e-43	7.12503e-43	-3.67644	7.50284e-42	4.33546e-41	-3.20383	2.53549e-32	8.76689e-32	-3.11142	5.96595e-23	1.854e-22	-3.27127	3.22914e-28	1.19607e-27	-3.23086	3.63179e-26	1.17989e-25	-3.90674	9.52494e-108	9.02531e-107
ENSG00000138964	PARVG	-4.71218	2.31556e-78	1.64779e-76	-4.44222	1.34741e-65	3.55525e-64	-4.6927	5.42759e-78	5.03123e-76	-4.55125	2.033e-54	1.00862e-52	-4.58341	7.06969e-59	3.95285e-57	-4.57096	2.52332e-57	1.31194e-55	-4.61465	3.14984e-142	7.15827e-141
ENSG00000139146	FAM60A	-2.25346	1.80231e-39	8.46738e-39	-2.72601	8.38373e-51	8.39565e-50	-2.69749	5.81603e-49	5.31094e-48	-2.60172	6.27458e-34	4.11587e-33	-2.60812	1.74671e-37	1.23798e-36	-2.67938	1.49354e-39	1.21853e-38	-3.02349	1.10878e-136	2.15783e-135
ENSG00000139192	TAPBPL	-2.75974	7.19615e-50	6.17878e-49	-2.33426	2.16008e-40	1.14765e-39	-2.46194	1.97901e-42	1.19011e-41	-2.15234	7.253e-25	2.53711e-24	-2.28925	4.69943e-35	2.7927e-34	-2.20441	5.30958e-32	2.45607e-31	-2.21255	4.51297e-73	1.97539e-72
ENSG00000139278	GLIPR1	-4.66332	5.70687e-62	1.06503e-60	-4.01436	4.96175e-54	6.06867e-53	-3.28946	9.89779e-47	7.8085e-46	-3.57868	4.89106e-42	6.68429e-41	-3.54531	6.72054e-42	6.93718e-41	-3.70296	7.61032e-44	8.98069e-43	-4.67035	7.73111e-120	9.76088e-119
ENSG00000139318	DUSP6	-4.84351	2.89097e-63	5.86943e-62	-3.86324	2.45094e-40	1.29777e-39	-3.78961	1.01056e-38	4.94572e-38	-3.78879	2.84229e-37	2.48899e-36	-3.9076	1.72216e-40	1.56047e-39	-3.73693	1.49226e-29	5.92448e-29	-4.16148	5.60675e-70	2.29648e-69
ENSG00000139572	GPR84	-3.95729	3.65689e-41	1.8757e-40	-3.72504	1.35822e-37	6.21344e-37	-3.76506	1.05441e-36	4.57832e-36	-3.68068	1.14222e-27	4.81133e-27	-3.79658	1.93687e-30	8.28493e-30	-3.72027	4.14112e-29	1.59946e-28	-3.78472	3.83346e-85	2.17796e-84
ENSG00000139626	ITGB7	-2.5586	1.91023e-27	5.04405e-27	-2.52395	4.48538e-28	1.27417e-27	-2.46082	7.17257e-25	1.77146e-24	-2.44696	2.02295e-19	5.15898e-19	-2.48652	7.19518e-21	1.78172e-20	-2.45725	5.73974e-20	1.3443e-19	-2.58172	1.65287e-68	6.53633e-68
ENSG00000139644	TMBIM6	-2.49911	9.07446e-47	6.42185e-46	-2.19927	5.17762e-36	2.19538e-35	-2.48336	1.42741e-57	2.42608e-56	-2.30659	2.50169e-37	2.19756e-36	-2.33441	2.00876e-42	2.16718e-41	-2.1283	7.06321e-41	6.46238e-40	-2.93838	2.51037e-89	1.56509e-88
ENSG00000139679	LPAR6	-5.18574	3.00399e-56	3.84783e-55	-4.59556	7.53258e-45	5.23256e-44	-3.79299	2.70661e-44	1.816e-43	-3.96098	1.19818e-33	7.70881e-33	-3.63333	1.0068e-32	5.04655e-32	-4.35618	1.85271e-40	1.64284e-39	-5.20654	2.59978e-129	4.2299e-128
ENSG00000139687	RB1	-2.36898	1.06315e-36	4.32443e-36	-2.75332	1.05136e-40	5.69758e-40	-2.0678	9.24043e-41	5.07791e-40	-2.15139	2.09607e-31	1.13547e-30	-2.03378	5.90428e-32	2.80597e-31	-2.27099	8.81089e-36	5.36962e-35	-3.78676	3.15382e-116	3.63942e-115
ENSG00000139832	RAB20	-4.73018	1.57939e-58	2.34003e-57	-4.09543	6.64903e-39	3.24731e-38	-4.23218	4.83298e-47	3.90015e-46	-3.99775	4.75607e-34	3.15356e-33	-4.18381	2.64276e-35	1.59539e-34	-4.14653	1.56687e-38	1.17997e-37	-4.05951	1.13142e-78	5.60539e-78
ENSG00000139921	TMX1	-2.64955	1.73975e-41	9.07593e-41	-2.84736	3.48418e-41	1.93581e-40	-2.31015	2.44101e-37	1.10237e-36	-2.47211	1.15562e-29	5.54965e-29	-2.257	1.13316e-28	4.33512e-28	-2.47195	1.12954e-33	5.92746e-33	-3.81753	1.48787e-113	1.61262e-112
ENSG00000140030	GPR65	-3.34036	1.0799e-51	1.03018e-50	-3.13557	3.46503e-46	2.61782e-45	-2.77027	1.71953e-38	8.28597e-38	-2.83635	1.4061e-30	7.21484e-30	-2.71172	4.52644e-29	1.77258e-28	-2.88681	5.91966e-34	3.16659e-33	-3.30537	5.22683e-125	7.53027e-124
ENSG00000140379	BCL2A1	-5.95288	8.19538e-47	5.81435e-46	-5.48063	2.34924e-39	1.18217e-38	-5.28779	2.1767e-34	8.37968e-34	-5.08933	2.05033e-27	8.44711e-27	-5.11844	4.86166e-26	1.58493e-25	-5.43572	3.31823e-31	1.46152e-30	-5.80718	9.86871e-93	6.65312e-92
ENSG00000140497	SCAMP2	-4.05184	1.99474e-61	3.58036e-60	-3.66017	6.19079e-52	6.66373e-51	-4.54616	3.18702e-53	3.96175e-52	-4.13633	6.30264e-36	4.88203e-35	-4.24607	2.16146e-43	2.52739e-42	-3.76322	6.60306e-43	7.12928e-42	-3.75457	2.29371e-118	2.78847e-117
ENSG00000140675	SLC5A2	-2.202	4.38932e-51	4.03691e-50	-2.55852	3.97641e-68	1.20231e-66	-2.43908	2.68489e-54	3.57562e-53	-2.39774	3.53298e-44	6.04856e-43	-2.45733	4.04446e-50	9.04548e-49	-2.46586	2.84369e-47	4.65361e-46	-2.55389	8.53453e-157	2.72521e-155
ENSG00000140678	ITGAX	-4.53014	2.05363e-63	4.21802e-62	-3.73585	1.88158e-42	1.12911e-41	-4.14111	4.35731e-52	4.97524e-51	-3.82294	5.75286e-39	5.89512e-38	-3.76222	1.15938e-39	9.80534e-39	-3.83326	3.37289e-43	3.75684e-42	-4.087	4.52e-95	3.19873e-94
ENSG00000140749	IGSF6	-5.80641	2.97439e-77	1.8878e-75	-5.26791	8.42317e-62	1.73006e-60	-4.53041	2.4565e-60	5.14295e-59	-4.47334	2.54572e-47	6.13149e-46	-4.27478	1.80742e-49	3.77842e-48	-4.61728	2.85486e-47	4.66647e-46	-4.97735	6.44389e-126	9.58759e-125
ENSG00000140968	IRF8	-5.6258	2.09567e-54	2.36982e-53	-5.48403	1.05952e-52	1.19048e-51	-5.28997	6.29772e-57	1.0176e-55	-5.13561	1.32597e-40	1.59546e-39	-5.01702	1.26667e-41	1.27572e-40	-5.10156	1.22153e-42	1.29312e-41	-6.07971	3.27044e-143	7.59151e-142
ENSG00000141506	PIK3R5	-4.37614	3.31112e-85	4.02187e-83	-4.01818	7.54331e-67	2.12146e-65	-3.96281	2.07598e-68	9.31545e-67	-3.80765	1.86708e-46	4.0535e-45	-3.86212	1.51251e-51	3.91752e-50	-3.81031	6.59039e-52	1.7961e-50	-4.21507	3.09728e-163	1.15758e-161
ENSG00000141682	PMAIP1	-4.59582	1.21234e-53	1.31399e-52	-4.41608	4.56261e-54	5.59505e-53	-4.71198	1.98928e-56	3.09875e-55	-4.60787	6.42655e-39	6.54264e-38	-4.69084	1.2335e-44	1.62573e-43	-4.50421	7.03852e-44	8.3549e-43	-4.67383	3.44274e-129	5.58207e-128
ENSG00000141968	VAV1	-3.48245	4.24799e-68	1.27621e-66	-2.76297	1.89209e-46	1.45284e-45	-2.74518	6.24847e-50	6.11395e-49	-2.58588	1.26901e-33	8.14597e-33	-2.5902	1.62811e-38	1.25486e-37	-2.62736	1.40507e-38	1.06323e-37	-2.99305	2.0454e-110	2.04395e-109
ENSG00000142347	MYO1F	-5.06644	6.14838e-64	1.30862e-62	-4.35648	6.18672e-52	6.66373e-51	-4.67009	1.00092e-55	1.48296e-54	-4.40401	9.2526e-40	1.0217e-38	-4.49967	1.56472e-43	1.84957e-42	-4.36185	5.93396e-42	5.94662e-41	-4.03595	1.45785e-106	1.3347e-105
ENSG00000142512	SIGLEC10	-6.93528	7.95924e-83	8.01041e-81	-6.18066	8.36429e-58	1.33167e-56	-6.36647	4.48102e-67	1.8091e-65	-6.10241	1.30911e-48	3.58858e-47	-6.17108	4.99102e-52	1.34462e-50	-6.06741	2.3005e-49	4.67736e-48	-6.46841	1.99087e-140	4.24377e-139
ENSG00000142583	SLC2A5	-5.89773	3.83286e-64	8.2703e-63	-4.99682	3.77562e-42	2.22681e-41	-5.09234	4.8573e-51	5.11123e-50	-4.8105	4.13206e-38	3.91531e-37	-4.84742	2.14468e-40	1.92844e-39	-4.81869	1.5016e-39	1.2244e-38	-5.44901	1.97691e-106	1.79592e-105
ENSG00000142669	SH3BGRL3	-3.58007	8.65084e-50	7.37835e-49	-2.62019	1.67676e-38	8.02498e-38	-4.97421	2.40503e-43	1.52643e-42	-4.45359	1.21472e-31	6.67786e-31	-4.57334	5.04365e-36	3.18677e-35	-3.6708	7.82303e-38	5.56699e-37	-2.76858	2.49033e-65	9.2048e-65
ENSG00000142684	ZNF593	-2.0314	1.6218e-51	1.52647e-50	-2.30385	2.98768e-61	5.94582e-60	-2.15368	1.41849e-49	1.3523e-48	-2.09516	1.71953e-36	1.40698e-35	-2.10115	3.0314e-40	2.68801e-39	-2.10615	1.36539e-39	1.1185e-38	-2.3973	1.29132e-148	3.49225e-147
ENSG00000143079	CTTNBP2NL	-2.84496	4.1832e-41	2.14021e-40	-2.58482	1.37113e-38	6.59358e-38	-2.19483	5.6732e-34	2.13674e-33	-2.10305	1.51358e-26	5.89126e-26	-2.02807	5.02765e-27	1.73627e-26	-2.13051	1.13394e-27	4.04997e-27	-3.22055	9.05584e-102	7.48368e-101
ENSG00000143110	C1orf162	-2.43718	4.42476e-34	1.58719e-33	-3.44566	1.80903e-39	9.17209e-39	-3.6895	1.92848e-45	1.39632e-44	-3.72526	1.57101e-34	1.08401e-33	-3.54554	5.60779e-36	3.53529e-35	-3.90423	5.35126e-36	3.31717e-35	-3.62195	5.25555e-91	3.42827e-90
ENSG00000143119	CD53	-7.76462	3.68672e-69	1.20524e-67	-6.13515	9.22166e-54	1.1134e-52	-5.80673	2.21704e-63	6.00732e-62	-5.87317	4.38879e-50	1.38031e-48	-5.74279	2.08493e-48	3.90128e-47	-5.87445	1.32007e-55	5.48666e-54	-6.82825	3.91463e-119	4.84259e-118
ENSG00000143226	FCGR2A	-6.36371	2.44338e-68	7.55562e-67	-5.51016	1.25789e-44	8.5746e-44	-5.51302	1.74454e-54	2.35446e-53	-5.29608	2.08112e-40	2.44766e-39	-5.19293	1.01579e-40	9.39755e-40	-5.22295	2.02402e-43	2.29987e-42	-6.20806	1.14729e-124	1.63782e-123
ENSG00000143333	RGS16	-2.97195	4.36265e-19	8.35073e-19	-3.6287	4.70987e-24	1.12669e-23	-3.72263	1.51358e-25	3.84813e-25	-3.5809	1.93656e-18	4.69641e-18	-3.65461	4.21998e-20	1.00881e-19	-3.58167	1.4345e-19	3.29295e-19	-3.08479	3.72296e-33	7.32429e-33
ENSG00000143384	MCL1	-2.50229	8.94097e-33	3.00808e-32	-2.70292	6.60326e-29	1.95339e-28	-2.63861	2.43646e-31	8.04541e-31	-2.51436	1.68451e-21	4.8212e-21	-2.52394	1.70599e-22	4.59782e-22	-2.60203	3.36865e-23	9.30673e-23	-3.18356	7.60494e-68	2.96496e-67
ENSG00000143546	S100A8	-4.7872	3.8543e-20	7.66183e-20	-3.79404	2.05471e-12	3.2398e-12	-3.7454	1.91627e-11	2.94312e-11	-3.49447	5.93278e-09	9.25929e-09	-3.64404	2.4858e-09	3.77139e-09	-3.90578	4.03701e-11	6.47337e-11	-4.31572	2.35656e-25	4.02764e-25
ENSG00000143570	SLC39A1	-2.74368	5.5817e-52	5.43888e-51	-2.47671	4.00151e-37	1.78365e-36	-3.04966	3.02236e-52	3.48201e-51	-2.72495	2.95256e-32	1.70429e-31	-2.95449	1.02946e-36	6.87443e-36	-2.61384	4.68033e-37	3.13133e-36	-2.70133	2.94173e-77	1.4156e-76
ENSG00000143753	DEGS1	-3.02192	6.97478e-57	9.35059e-56	-2.36435	1.69291e-39	8.5957e-39	-2.55594	1.71677e-58	3.16199e-57	-2.5004	1.79084e-41	2.34507e-40	-2.47657	1.01885e-47	1.79445e-46	-2.42794	1.37462e-44	1.78019e-43	-3.28626	6.69746e-83	3.62951e-82
ENSG00000143815	LBR	-2.53768	3.84938e-41	1.97228e-40	-2.56735	1.33784e-36	5.84866e-36	-2.27389	6.45786e-38	2.99215e-37	-2.23185	1.36194e-27	5.69767e-27	-2.10336	7.7675e-27	2.64934e-26	-2.40693	2.6344e-29	1.03222e-28	-3.45324	1.30018e-111	1.3372e-110
ENSG00000143870	PDIA6	-2.87666	3.69666e-31	1.1526e-30	-2.6373	6.41154e-33	2.31519e-32	-2.33025	4.93236e-37	2.17995e-36	-2.2332	1.39821e-28	6.24233e-28	-2.327	2.94196e-32	1.42693e-31	-2.124	2.02442e-27	7.11501e-27	-3.484	6.30531e-63	2.21385e-62
ENSG00000143882	ATP6V1C2	-3.95762	2.34977e-64	5.1651e-63	-3.91228	4.1219e-66	1.12119e-64	-3.64346	2.1943e-56	3.40128e-55	-3.74885	1.04492e-44	1.88032e-43	-3.73658	1.66501e-46	2.60957e-45	-3.91014	4.00776e-49	7.98717e-48	-4.0344	5.534e-139	1.14499e-137
ENSG00000144655	CSRNP1	-3.18132	3.15781e-38	1.38869e-37	-3.17803	1.3174e-38	6.33954e-38	-3.35284	5.4639e-36	2.2865e-35	-3.01202	2.6046e-27	1.06528e-26	-3.40261	2.03884e-29	8.19374e-29	-2.86897	2.85166e-24	8.35341e-24	-3.21344	1.83837e-61	6.22811e-61
ENSG00000144785	RP11-977G19.10	-5.08487	1.66444e-96	6.51442e-94	-5.08487	3.66267e-100	1.29017e-97	-5.08487	7.59674e-93	2.97328e-90	-5.08487	2.76653e-73	1.08279e-70	-5.08487	5.84588e-77	2.22618e-74	-5.08487	1.64599e-74	5.798e-72	-5.08487	9.25348e-234	3.43109e-231
ENSG00000144843	ADPRH	-3.43873	8.49208e-66	2.12151e-64	-3.27196	2.47937e-57	3.81796e-56	-3.37401	1.81751e-60	3.85674e-59	-3.17623	2.19578e-41	2.84101e-40	-3.25979	1.02115e-48	1.97908e-47	-3.18138	1.88912e-46	2.8807e-45	-3.46403	1.18898e-138	2.42794e-137
ENSG00000145337	PYURF	-5.88713	5.71257e-67	1.57515e-65	-5.89445	1.30591e-69	4.39147e-68	-5.88218	2.82627e-64	8.509e-63	-5.87768	1.80827e-50	5.95291e-49	-5.88041	3.86162e-53	1.21996e-51	-5.89397	1.58616e-51	4.10074e-50	-5.895	1.61143e-163	6.11998e-162
ENSG00000145569	FAM105A	-5.369	1.41246e-59	2.25131e-58	-5.33836	1.91634e-56	2.7722e-55	-4.39626	1.06826e-51	1.17134e-50	-4.50997	7.32097e-41	8.9542e-40	-4.34776	9.25376e-42	9.44822e-41	-4.62456	3.51833e-43	3.90341e-42	-5.78459	4.46327e-148	1.19105e-146
ENSG00000145685	LHFPL2	-4.94106	1.56757e-64	3.48926e-63	-4.29335	3.38914e-49	3.07686e-48	-3.50969	1.90243e-50	1.93261e-49	-3.43129	1.15235e-35	8.77754e-35	-3.29551	1.00588e-35	6.25732e-35	-3.5075	3.51354e-39	2.77967e-38	-5.04352	1.86958e-144	4.49528e-143
ENSG00000146070	PLA2G7	-3.36322	1.74581e-33	6.09476e-33	-3.09628	3.62155e-32	1.25839e-31	-2.60804	9.7918e-28	2.75162e-27	-2.64974	7.82431e-22	2.28155e-21	-2.3948	2.12856e-21	5.40581e-21	-2.75426	1.02766e-23	2.91637e-23	-3.57055	1.19721e-84	6.72863e-84
ENSG00000146094	DOK3	-2.92545	9.28886e-38	3.98054e-37	-2.99408	2.38318e-40	1.26332e-39	-3.35743	3.84688e-41	2.16464e-40	-3.12393	1.22613e-30	6.31208e-30	-3.31403	1.03298e-35	6.40891e-35	-3.06169	5.26047e-30	2.15278e-29	-2.75285	4.39836e-70	1.80626e-69
ENSG00000146192	FGD2	-3.64379	4.35333e-54	4.82599e-53	-3.0029	6.79963e-39	3.31856e-38	-3.0397	2.24452e-43	1.42649e-42	-2.8211	8.53042e-29	3.86102e-28	-2.8184	6.164e-31	2.72345e-30	-2.92742	7.55432e-31	3.25705e-30	-3.20397	6.92158e-92	4.58942e-91
ENSG00000147065	MSN	-3.44214	1.22824e-44	7.67106e-44	-3.12062	5.50294e-37	2.44363e-36	-4.08055	2.48603e-44	1.67439e-43	-3.49366	5.69088e-30	2.79876e-29	-3.68927	6.01509e-35	3.54021e-34	-3.05582	1.07659e-37	7.58458e-37	-3.73937	4.87825e-79	2.43826e-78
ENSG00000147168	IL2RG	-2.51164	3.58396e-27	9.35496e-27	-2.36594	2.71837e-25	6.84083e-25	-2.46678	1.07976e-24	2.64819e-24	-2.42128	1.25126e-18	3.05921e-18	-2.48105	1.08958e-20	2.67693e-20	-2.50055	1.76171e-20	4.22078e-20	-2.33871	6.77422e-55	2.01284e-54
ENSG00000147586	MRPS28	-3.07715	1.56809e-58	2.32572e-57	-2.95338	9.60837e-57	1.42208e-55	-2.27556	1.60214e-43	1.02609e-42	-2.43286	1.52755e-39	1.65182e-38	-2.31266	1.37284e-38	1.0634e-37	-2.52787	8.09528e-40	6.73514e-39	-3.73497	1.10802e-127	1.72509e-126
ENSG00000147872	PLIN2	-3.87536	1.34127e-42	7.43745e-42	-3.30818	4.56176e-31	1.49791e-30	-3.61257	1.35087e-35	5.53789e-35	-3.40762	8.4125e-27	3.32209e-26	-3.38253	9.43183e-29	3.62505e-28	-3.30976	1.81182e-19	4.13485e-19	-3.51231	3.15965e-65	1.16513e-64
ENSG00000148444	COMMD3	-2.13608	5.02017e-40	2.43995e-39	-3.04311	4.15953e-54	5.12306e-53	-2.94256	4.60981e-47	3.72433e-46	-3.03139	1.15816e-39	1.26598e-38	-2.9884	4.2307e-40	3.71174e-39	-3.29788	5.54814e-45	7.55297e-44	-3.52723	8.03328e-121	1.04418e-119
ENSG00000148803	FUOM	-3.1115	2.55611e-53	2.73052e-52	-2.72509	2.51849e-47	2.03823e-46	-2.71219	6.68859e-44	4.37929e-43	-2.52721	3.48273e-35	2.54389e-34	-2.58279	2.08686e-36	1.35752e-35	-2.64476	1.1192e-36	7.28047e-36	-2.75627	3.76546e-86	2.19509e-85
ENSG00000148841	ITPRIP	-4.24065	1.6386e-65	3.94666e-64	-3.82762	2.47871e-55	3.31987e-54	-3.93121	1.77642e-55	2.56979e-54	-3.65936	1.07381e-37	9.78024e-37	-3.77636	5.01036e-42	5.21003e-41	-3.59753	1.2731e-38	9.6857e-38	-4.0945	8.68406e-124	1.21871e-122
ENSG00000148908	RGS10	-5.83979	4.315e-55	5.16992e-54	-4.78879	1.86111e-42	1.1173e-41	-4.8786	1.36285e-48	1.21458e-47	-4.8104	1.9801e-37	1.76023e-36	-4.60661	2.61061e-36	1.68422e-35	-4.93891	1.89856e-41	1.81978e-40	-5.42581	2.53259e-103	2.16662e-102
ENSG00000149781	FERMT3	-4.97921	3.14907e-55	3.80209e-54	-4.80093	1.47737e-56	2.15936e-55	-5.00186	1.27079e-59	2.51128e-58	-4.68164	1.76267e-42	2.52399e-41	-4.87857	4.40775e-49	8.8343e-48	-4.48107	7.77603e-45	1.03852e-43	-4.9607	1.24647e-118	1.52587e-117
ENSG00000150337	FCGR1A	-6.28812	1.39384e-65	3.37444e-64	-5.39093	5.46443e-46	4.09216e-45	-5.61675	6.19759e-51	6.46845e-50	-5.48029	3.72983e-41	4.72601e-40	-5.31534	8.2158e-39	6.48882e-38	-5.57575	1.77222e-43	2.02355e-42	-5.56772	6.5659e-98	4.97384e-97
ENSG00000150527	CTAGE5	-3.29149	5.81652e-68	1.73266e-66	-3.24709	9.5667e-70	3.23249e-68	-2.70479	4.54053e-54	5.9292e-53	-2.79611	7.19201e-44	1.19499e-42	-2.68345	1.65708e-44	2.16388e-43	-2.96015	1.2631e-47	2.14164e-46	-3.1545	1.57643e-150	4.39841e-149
ENSG00000150681	RGS18	-4.22039	9.23735e-49	7.36584e-48	-3.85873	1.10092e-40	5.95469e-40	-3.5343	3.48111e-37	1.5576e-36	-3.52784	9.5945e-29	4.3329e-28	-3.37077	9.94527e-27	3.3701e-26	-3.62636	1.26282e-31	5.70843e-31	-4.28778	6.88162e-122	9.156e-121
ENSG00000150782	IL18	-4.87883	1.47555e-65	3.56613e-64	-4.1701	1.57931e-45	1.14174e-44	-3.94604	4.85734e-52	5.51935e-51	-4.01163	4.66296e-41	5.82973e-40	-3.789	6.07504e-41	5.73708e-40	-4.17446	6.20113e-43	6.74855e-42	-4.59768	1.29171e-113	1.40326e-112
ENSG00000150977	RILPL2	-2.90812	9.45428e-53	9.75188e-52	-2.43883	1.89412e-49	1.75235e-48	-2.83333	1.24956e-54	1.70438e-53	-2.74898	3.94936e-40	4.52529e-39	-2.8253	2.20409e-43	2.5751e-42	-2.7407	6.46861e-43	7.00021e-42	-2.19066	6.14653e-84	3.39892e-83
ENSG00000150991	UBC	-2.93555	1.07566e-34	3.99789e-34	-2.83713	8.06765e-41	4.39912e-40	-2.24781	9.24968e-40	4.78092e-39	-2.35867	3.54311e-34	2.36823e-33	-2.32628	1.57916e-32	7.82362e-32	-2.24995	2.05828e-27	7.225e-27	-3.42588	3.91243e-65	1.43932e-64
ENSG00000151117	TMEM86A	-3.23864	1.73982e-41	9.07593e-41	-3.11045	1.20207e-43	7.73739e-43	-2.78289	4.60692e-39	2.29775e-38	-2.63169	4.8914e-30	2.42079e-29	-2.67595	8.87018e-33	4.45723e-32	-2.5798	1.03076e-29	4.14006e-29	-3.61033	4.00742e-111	4.06805e-110
ENSG00000151364	KCTD14	-3.01977	3.04648e-62	5.78503e-61	-3.41145	1.18633e-75	5.80393e-74	-3.34427	3.58616e-67	1.47315e-65	-3.35692	1.34825e-52	5.65383e-51	-3.3566	7.43002e-56	3.07909e-54	-3.35853	1.42133e-54	5.2563e-53	-3.47002	5.6806e-178	3.15117e-176
ENSG00000151702	FLI1	-3.02964	1.4423e-45	9.53189e-45	-2.53123	1.38368e-32	4.91827e-32	-2.69072	3.58971e-42	2.1216e-41	-2.46917	1.21682e-26	4.75723e-26	-2.48929	5.14424e-29	2.00838e-28	-2.52837	1.1952e-30	5.08925e-30	-2.87786	4.23794e-86	2.46746e-85
ENSG00000152213	ARL11	-2.62637	7.72549e-50	6.61715e-49	-2.50065	5.60429e-48	4.73408e-47	-2.44097	3.40945e-43	2.13983e-42	-2.36954	1.38064e-32	8.19775e-32	-2.38188	1.53752e-35	9.4231e-35	-2.44834	1.73783e-35	1.02969e-34	-2.56437	1.6395e-117	1.93959e-116
ENSG00000152766	ANKRD22	-3.44138	8.62208e-26	2.11905e-25	-3.12982	3.56699e-22	7.92728e-22	-3.04565	1.10139e-19	2.23418e-19	-2.99809	1.92043e-15	3.99984e-15	-2.88954	1.07812e-14	2.00538e-14	-3.13322	6.217e-17	1.26403e-16	-3.23718	2.19089e-54	6.45674e-54
ENSG00000152804	HHEX	-3.65236	7.58996e-47	5.39025e-46	-3.22751	4.94827e-42	2.90142e-41	-3.52803	2.40773e-45	1.72558e-44	-3.42588	8.1188e-34	5.29111e-33	-3.45181	9.61938e-37	6.44187e-36	-3.34145	5.9013e-35	3.37457e-34	-3.55484	4.8737e-100	3.85572e-99
ENSG00000153071	DAB2	-2.61958	1.06924e-28	2.98564e-28	-3.80447	3.88596e-51	3.97915e-50	-3.63705	3.23636e-49	3.01789e-48	-3.56868	3.66232e-35	2.67092e-34	-3.44227	1.07779e-37	7.73614e-37	-3.6213	2.32461e-40	2.03946e-39	-4.14578	3.40213e-130	5.61312e-129
ENSG00000153208	MERTK	-4.08934	2.39559e-40	1.18269e-39	-3.37855	3.98641e-34	1.52177e-33	-3.03715	1.68561e-40	9.14295e-40	-2.97531	2.88737e-28	1.26227e-27	-2.85343	2.57908e-30	1.0939e-29	-3.08801	1.1547e-30	4.92872e-30	-3.72942	5.5931e-73	2.44135e-72
ENSG00000153234	NR4A2	-4.50906	3.56969e-41	1.83298e-40	-5.16344	4.70589e-42	2.76275e-41	-5.97287	7.56352e-53	9.13979e-52	-5.6541	4.25359e-41	5.34639e-40	-5.5684	4.7813e-42	4.97552e-41	-5.29521	7.61956e-37	5.01446e-36	-6.04951	4.31501e-98	3.27755e-97
ENSG00000153551	CMTM7	-3.9935	1.23292e-57	1.72511e-56	-4.29493	1.47112e-63	3.3759e-62	-4.52731	1.4399e-75	1.12712e-73	-4.47383	1.37467e-54	6.96732e-53	-4.42339	6.65386e-61	4.4223e-59	-4.44092	8.96146e-61	6.75225e-59	-4.41825	6.21444e-152	1.79798e-150
ENSG00000154016	GRAP	-2.45643	2.09554e-49	1.74711e-48	-2.41926	1.28003e-50	1.26566e-49	-2.46646	1.71218e-47	1.4258e-46	-2.43946	1.1552e-36	9.6233e-36	-2.45956	3.80972e-39	3.09389e-38	-2.44316	1.22694e-37	8.61364e-37	-2.34928	8.44876e-112	8.7339e-111
ENSG00000154589	LY96	-4.55869	5.26827e-51	4.80453e-50	-3.89599	9.50151e-39	4.60531e-38	-3.8232	3.04847e-36	1.29454e-35	-3.84343	6.76757e-29	3.08693e-28	-3.61724	9.15731e-31	4.00082e-30	-4.14241	7.59221e-38	5.4082e-37	-4.61347	4.37095e-93	2.97521e-92
ENSG00000154710	RABGEF1	-2.45749	2.18873e-61	3.90864e-60	-2.40879	1.27722e-55	1.7438e-54	-2.14221	1.6894e-49	1.60401e-48	-2.18334	1.83081e-36	1.49024e-35	-2.04695	2.01111e-37	1.41753e-36	-2.25282	8.88326e-42	8.80825e-41	-2.16214	6.34093e-94	4.39467e-93
ENSG00000154889	MPPE1	-2.71651	4.14088e-36	1.64213e-35	-2.50745	1.59236e-37	7.24921e-37	-2.18977	4.25835e-33	1.5275e-32	-2.16272	2.7466e-26	1.05248e-25	-2.0862	2.58678e-26	8.59211e-26	-2.32506	8.21749e-29	3.13354e-28	-2.73936	6.55582e-74	2.94083e-73
ENSG00000155090	KLF10	-4.30573	6.11661e-47	4.37478e-46	-3.41882	4.36511e-36	1.85646e-35	-3.73859	2.88145e-33	1.04289e-32	-3.47833	6.59234e-27	2.62642e-26	-3.47148	8.2045e-27	2.79365e-26	-3.34641	6.63878e-26	2.12544e-25	-3.87867	3.20166e-70	1.31943e-69
ENSG00000155307	SAMSN1	-6.58208	6.66525e-78	4.47207e-76	-5.98068	1.09483e-58	1.83645e-57	-5.51822	5.72985e-58	1.01424e-56	-5.51961	1.45446e-43	2.32351e-42	-5.28152	9.09848e-42	9.29642e-41	-5.67952	1.93896e-50	4.39226e-49	-6.53622	5.62999e-176	3.01622e-174
ENSG00000155465	SLC7A7	-4.80805	5.92915e-74	2.952e-72	-4.59222	7.62478e-60	1.37912e-58	-4.48517	3.3654e-65	1.12318e-63	-4.36769	6.86222e-48	1.76118e-46	-4.30873	6.07052e-51	1.45713e-49	-4.41053	1.25902e-50	2.9129e-49	-4.76879	1.17919e-158	3.93714e-157
ENSG00000155629	PIK3AP1	-4.29217	5.62051e-51	5.12244e-50	-3.65206	1.78125e-34	6.95807e-34	-3.12274	8.25233e-34	3.07444e-33	-2.92692	1.5437e-22	4.68867e-22	-2.82584	2.81125e-23	7.87172e-23	-2.96658	3.93373e-26	1.27563e-25	-4.2773	2.07995e-117	2.45448e-116
ENSG00000155659	VSIG4	-8.15693	1.31019e-57	1.82777e-56	-6.71998	1.24229e-37	5.69418e-37	-6.64475	5.8395e-46	4.37885e-45	-6.40586	9.06767e-34	5.88772e-33	-6.27645	4.91685e-35	2.91331e-34	-6.29384	3.29427e-35	1.91249e-34	-7.39522	5.04626e-92	3.35544e-91
ENSG00000155926	SLA	-5.37014	8.48294e-66	2.12151e-64	-4.63989	5.37295e-50	5.14649e-49	-4.39409	5.88592e-52	6.66661e-51	-4.21354	3.89586e-37	3.37386e-36	-3.96251	4.98884e-38	3.70157e-37	-4.20787	4.73817e-40	4.05102e-39	-5.14923	2.30971e-136	4.45197e-135
ENSG00000155957	TMBIM4	-4.84408	6.98006e-73	3.10249e-71	-4.51058	8.06333e-69	2.53034e-67	-4.36273	4.87969e-72	2.86479e-70	-4.40503	1.97263e-57	1.28085e-55	-4.23019	5.17304e-59	2.91553e-57	-4.52966	2.07632e-56	9.40684e-55	-4.91579	7.35455e-134	1.33538e-132
ENSG00000157017	GHRL	-2.81497	6.30641e-48	4.8135e-47	-2.92077	3.27298e-55	4.3506e-54	-2.3124	2.41049e-37	1.08998e-36	-2.17108	1.15731e-26	4.52706e-26	-2.24682	5.96476e-30	2.47697e-29	-2.32499	1.0906e-27	3.89816e-27	-2.90439	2.20334e-116	2.54886e-115
ENSG00000157303	SUSD3	-5.73746	2.00391e-50	1.77579e-49	-5.2236	3.7932e-45	2.70067e-44	-5.31581	1.85261e-44	1.25496e-43	-5.09739	2.00644e-33	1.26945e-32	-5.06675	3.38938e-36	2.16484e-35	-4.88352	4.09473e-33	2.06406e-32	-5.5525	5.78683e-109	5.60774e-108
ENSG00000157514	TSC22D3	-2.52187	1.84637e-25	4.47769e-25	-3.22583	4.81117e-33	1.7485e-32	-3.28197	8.8537e-34	3.28892e-33	-3.35125	1.52883e-27	6.37125e-27	-3.44038	2.21275e-28	8.28313e-28	-3.25072	2.37203e-27	8.29534e-27	-3.46971	5.33255e-70	2.18608e-69
ENSG00000157601	MX1	-3.67603	1.39927e-48	1.10762e-47	-2.93359	5.73159e-39	2.80996e-38	-2.20523	1.70521e-29	5.20165e-29	-2.2391	4.83329e-24	1.60313e-23	-2.35352	1.0354e-25	3.3285e-25	-2.17669	8.1595e-23	2.21219e-22	-2.60932	2.64037e-62	9.12954e-62
ENSG00000157734	SNX22	-2.791	4.55324e-45	2.92279e-44	-2.09082	4.23885e-25	1.06009e-24	-2.52255	1.55025e-40	8.42707e-40	-2.12744	1.53089e-26	5.95699e-26	-2.24919	3.38607e-32	1.63558e-31	-2.07774	7.01428e-27	2.37689e-26	-2.24048	2.07205e-53	5.96795e-53
ENSG00000158428	CATIP	-2.48076	1.05091e-46	7.40738e-46	-2.47445	1.04603e-47	8.66244e-47	-2.34793	3.86021e-41	2.17127e-40	-2.32174	1.98159e-29	9.35992e-29	-2.34218	4.27652e-34	2.36113e-33	-2.39947	1.51152e-34	8.42788e-34	-2.26948	5.6061e-98	4.25135e-97
ENSG00000158517	NCF1	-3.43032	3.5935e-39	1.65845e-38	-3.1943	1.14033e-35	4.73958e-35	-3.44861	1.65963e-37	7.55059e-37	-3.39481	6.20539e-29	2.83876e-28	-3.40427	2.24205e-30	9.55549e-30	-3.3521	2.63674e-29	1.03285e-28	-3.26686	7.54357e-83	4.08175e-82
ENSG00000158769	F11R	-2.7943	5.32684e-50	4.6131e-49	-2.4411	1.75586e-40	9.35706e-40	-2.61664	3.53132e-52	4.04852e-51	-2.48957	1.84153e-35	1.37723e-34	-2.61232	1.56038e-41	1.55927e-40	-2.52633	2.0428e-39	1.6438e-38	-2.33734	4.36385e-75	2.01398e-74
ENSG00000158869	FCER1G	-7.50097	3.04681e-60	5.06245e-59	-6.26158	1.37215e-40	7.37358e-40	-7.82732	5.24286e-56	7.88387e-55	-7.48545	5.79481e-42	7.85086e-41	-7.48106	5.20898e-46	7.80793e-45	-6.81703	8.97779e-44	1.05326e-42	-6.5586	5.11851e-85	2.8987e-84
ENSG00000159189	C1QC	-5.52912	9.58056e-39	4.32771e-38	-3.80402	2.33774e-21	5.03188e-21	-4.82871	1.33081e-38	6.46147e-38	-4.2909	1.18249e-24	4.07766e-24	-4.42772	1.79214e-29	7.23324e-29	-3.76761	4.10577e-25	1.25844e-24	-4.21776	3.17394e-43	7.47714e-43
ENSG00000159314	ARHGAP27	-2.87037	7.37155e-41	3.72143e-40	-3.04038	4.79889e-45	3.37913e-44	-3.29301	6.73888e-46	5.02917e-45	-3.01607	1.03619e-32	6.21802e-32	-3.23767	1.45275e-37	1.03432e-36	-3.05261	1.10202e-33	5.79601e-33	-3.09981	2.43669e-101	1.99263e-100
ENSG00000159322	ADPGK	-2.65601	1.04112e-42	5.81885e-42	-2.64775	1.35619e-45	9.88043e-45	-2.2437	1.8754e-41	1.06765e-40	-2.36821	2.17799e-33	1.37429e-32	-2.19026	1.79102e-31	8.23073e-31	-2.54447	5.61684e-39	4.38455e-38	-2.86839	2.5933e-105	2.30825e-104
ENSG00000159374	M1AP	-3.03099	9.8559e-53	1.01439e-51	-2.50402	4.16398e-43	2.5926e-42	-2.50011	1.18227e-40	6.46666e-40	-2.41786	2.81535e-31	1.51175e-30	-2.31535	4.36519e-31	1.94515e-30	-2.54927	1.17238e-34	6.59433e-34	-2.76553	5.81998e-105	5.13163e-104
ENSG00000159388	BTG2	-5.59829	6.09745e-64	1.29974e-62	-5.71596	3.72572e-48	3.18154e-47	-6.73058	3.30593e-54	4.3634e-53	-6.29751	3.52855e-44	6.04832e-43	-6.46195	4.84339e-45	6.64493e-44	-6.03384	2.5671e-44	3.19527e-43	-6.35251	1.1086e-102	9.37023e-102
ENSG00000159399	HK2	-4.45898	6.9884e-55	8.23988e-54	-3.73423	1.7949e-34	7.00752e-34	-3.73504	3.47505e-49	3.23191e-48	-3.48044	3.80269e-33	2.34999e-32	-3.45505	3.34761e-33	1.73156e-32	-3.54386	2.23941e-35	1.31747e-34	-4.49187	2.5743e-113	2.77946e-112
ENSG00000160219	GAB3	-3.02565	4.20537e-52	4.13782e-51	-2.82765	2.25898e-46	1.72703e-45	-2.58494	4.78814e-43	2.9799e-42	-2.50462	1.09211e-29	5.25902e-29	-2.35839	4.48322e-29	1.75663e-28	-2.6023	3.0574e-34	1.67036e-33	-3.00425	1.14551e-117	1.36205e-116
ENSG00000160255	ITGB2	-6.92755	5.42315e-69	1.75257e-67	-5.91202	3.90897e-47	3.12762e-46	-6.00308	1.03182e-60	2.25052e-59	-5.54143	1.23892e-41	1.63756e-40	-5.70922	1.33268e-47	2.31534e-46	-5.29258	1.08299e-42	1.15164e-41	-6.29761	2.20531e-111	2.25165e-110
ENSG00000160410	SHKBP1	-3.47872	4.28351e-48	3.30892e-47	-2.59492	9.65028e-35	3.8216e-34	-3.5359	1.13727e-45	8.35893e-45	-3.1258	6.95539e-30	3.39223e-29	-3.26475	1.2806e-34	7.35574e-34	-2.86956	4.93423e-34	2.65153e-33	-2.44495	9.44631e-69	3.76303e-68
ENSG00000160712	IL6R	-3.36838	8.28023e-47	5.87159e-46	-2.68363	4.92691e-34	1.87116e-33	-2.45291	1.52618e-35	6.25111e-35	-2.15111	2.50077e-21	7.08542e-21	-2.33421	3.56209e-25	1.11286e-24	-2.28359	1.23747e-24	3.69327e-24	-2.4268	6.29663e-56	1.90959e-55
ENSG00000160888	IER2	-3.08333	1.55518e-28	4.30164e-28	-3.40788	1.14783e-31	3.88027e-31	-4.36421	2.52652e-35	1.02383e-34	-4.00029	2.21188e-26	8.51279e-26	-4.43569	1.36552e-30	5.9037e-30	-3.79088	7.86134e-27	2.65627e-26	-3.2744	2.10989e-69	8.53037e-69
ENSG00000161265	U2AF1L4	-2.45807	2.45832e-52	2.45136e-51	-2.51554	1.57032e-57	2.4639e-56	-2.73564	6.023e-55	8.42741e-54	-2.58766	4.09449e-41	5.16484e-40	-2.67386	6.74124e-46	9.94597e-45	-2.49661	1.56739e-44	2.00041e-43	-2.59986	9.69235e-103	8.20704e-102
ENSG00000161638	ITGA5	-3.73533	3.20169e-64	6.9617e-63	-3.44641	6.81051e-50	6.49696e-49	-3.29596	9.57888e-49	8.63508e-48	-2.98986	1.94442e-33	1.23132e-32	-3.24537	3.46226e-34	1.92363e-33	-2.93978	4.04669e-35	2.3368e-34	-3.50239	7.90055e-98	5.96244e-97
ENSG00000161640	SIGLEC11	-3.52917	7.55727e-52	7.3083e-51	-3.32384	2.19349e-50	2.14478e-49	-3.35515	3.17452e-46	2.42171e-45	-3.29287	1.58062e-35	1.19032e-34	-3.30342	5.92443e-38	4.36358e-37	-3.30085	1.36135e-36	8.78273e-36	-3.43064	1.54168e-117	1.82693e-116
ENSG00000161911	TREML1	-3.95039	1.37155e-59	2.18859e-58	-3.65617	1.22261e-53	1.46609e-52	-3.63228	2.67877e-48	2.3458e-47	-3.59572	1.81092e-38	1.77316e-37	-3.57612	6.49179e-40	5.60818e-39	-3.62569	5.79819e-40	4.91556e-39	-3.70833	2.15683e-111	2.20375e-110
ENSG00000161920	MED11	-2.57665	9.36107e-53	9.66991e-52	-2.44874	9.50333e-46	6.98862e-45	-2.87041	2.15125e-55	3.08352e-54	-2.68312	3.83317e-42	5.28985e-41	-2.74285	7.18287e-45	9.72206e-44	-2.69995	1.92962e-45	2.71884e-44	-2.65303	2.2952e-94	1.60175e-93
ENSG00000161921	CXCL16	-6.43375	7.4434e-70	2.57684e-68	-5.68087	9.53259e-54	1.14995e-52	-6.67309	3.647e-69	1.7186e-67	-6.27959	7.653e-50	2.34415e-48	-6.2588	1.86574e-54	6.74738e-53	-5.87721	8.09724e-56	3.42613e-54	-6.02427	2.52468e-131	4.28587e-130
ENSG00000161929	SCIMP	-3.76821	1.35898e-54	1.55674e-53	-3.64347	1.73654e-52	1.93269e-51	-3.29456	1.03972e-45	7.66194e-45	-3.25154	7.04708e-35	5.00723e-34	-3.22199	6.4539e-37	4.38032e-36	-3.362	3.19693e-37	2.17502e-36	-3.41339	2.03459e-113	2.2018e-112
ENSG00000161939	RNASEK-C17orf49	-6.73451	5.12604e-106	9.02823e-103	-6.7351	4.97824e-110	8.76792e-107	-6.73475	5.78005e-102	1.16344e-98	-6.72682	4.03504e-80	6.31709e-77	-6.733	1.49743e-84	3.01412e-81	-6.73606	6.16787e-82	1.2415e-78	-6.73385	6.03123e-256	1.06225e-252
ENSG00000161955	TNFSF13	-4.07366	5.09032e-56	6.421e-55	-3.65786	9.77827e-47	7.65847e-46	-4.52508	5.63233e-57	9.16391e-56	-4.24542	2.96921e-39	3.13614e-38	-4.41061	9.05655e-47	1.46674e-45	-4.03788	5.30957e-45	7.24219e-44	-3.93222	7.98833e-100	6.28451e-99
ENSG00000161960	EIF4A1	-5.3363	6.2483e-80	4.91835e-78	-5.5269	3.07846e-82	2.24744e-80	-5.14326	9.34701e-74	6.3317e-72	-5.10879	7.39326e-55	3.77431e-53	-5.03813	7.58762e-58	3.80461e-56	-5.27469	1.23883e-59	8.35172e-58	-5.35746	8.48452e-168	3.64472e-166
ENSG00000162032	SPSB3	-2.8672	1.60371e-37	6.7918e-37	-4.18323	4.21174e-65	1.07506e-63	-4.37905	1.62567e-61	3.77982e-60	-4.38633	6.89994e-49	1.9483e-47	-4.40666	2.18051e-51	5.54574e-50	-4.35636	1.72906e-49	3.59858e-48	-4.10168	2.47458e-136	4.76322e-135
ENSG00000162144	CYB561A3	-2.73481	5.30864e-53	5.59871e-52	-2.78169	5.2275e-55	6.8453e-54	-2.86423	5.91016e-51	6.18679e-50	-2.72086	3.32305e-38	3.1615e-37	-2.72674	3.64332e-41	3.49689e-40	-2.6843	7.59931e-40	6.35079e-39	-2.92091	1.394e-112	1.47791e-111
ENSG00000162194	LBHD1	-2.45773	2.68899e-59	4.20976e-58	-2.77778	5.61621e-72	2.17397e-70	-2.63202	1.28059e-57	2.19241e-56	-2.59733	3.12094e-45	5.89465e-44	-2.58044	1.46801e-48	2.80275e-47	-2.64971	9.15563e-48	1.57513e-46	-2.70284	2.03814e-146	5.11897e-145
ENSG00000162367	TAL1	-2.82506	2.6827e-39	1.24874e-38	-2.27262	2.17734e-28	6.26992e-28	-2.41301	5.64277e-32	1.92045e-31	-2.21844	1.23096e-21	3.54832e-21	-2.23227	5.64876e-23	1.55969e-22	-2.1837	2.08523e-22	5.51961e-22	-2.49	4.39725e-69	1.76315e-68
ENSG00000162493	PDPN	-2.61946	2.86202e-29	8.2348e-29	-3.11536	2.00006e-34	7.77187e-34	-3.25137	4.6243e-43	2.88175e-42	-3.08828	1.86288e-30	9.48953e-30	-3.16643	1.22966e-32	6.13956e-32	-3.04897	8.06738e-33	3.9689e-32	-3.30378	7.38449e-67	2.81666e-66
ENSG00000162511	LAPTM5	-7.05568	6.57534e-58	9.37719e-57	-5.59089	8.44192e-42	4.85893e-41	-6.36849	2.0265e-58	3.70343e-57	-5.90499	7.85767e-44	1.30099e-42	-5.84801	3.20471e-48	5.89482e-47	-5.57404	1.93065e-47	3.22308e-46	-6.0798	3.79995e-97	2.82093e-96
ENSG00000162704	ARPC5	-2.71897	3.00084e-52	2.9818e-51	-2.34212	9.84044e-43	5.98153e-42	-2.41332	5.56031e-42	3.24813e-41	-2.4516	2.7592e-33	1.72557e-32	-2.31837	1.26247e-35	7.78476e-35	-2.39132	6.28447e-36	3.86842e-35	-3.41766	5.17393e-114	5.68648e-113
ENSG00000162711	NLRP3	-6.83319	8.71568e-67	2.37532e-65	-6.27415	1.02995e-60	1.96108e-59	-5.68352	1.32142e-54	1.79891e-53	-5.65837	1.07068e-43	1.73601e-42	-5.5387	7.4259e-44	9.08254e-43	-5.84121	1.83995e-45	2.61077e-44	-6.1751	8.5538e-127	1.30155e-125
ENSG00000162736	NCSTN	-2.39927	2.80993e-46	1.93414e-45	-2.10529	1.7683e-36	7.68991e-36	-2.58327	5.36097e-59	1.02988e-57	-2.41191	5.86303e-43	8.87326e-42	-2.42175	9.06529e-49	1.76179e-47	-2.27674	6.94767e-42	6.93782e-41	-2.81665	1.78449e-88	1.08752e-87
ENSG00000162745	OLFML2B	-4.45232	4.40141e-71	1.6898e-69	-3.24588	9.44731e-48	7.85325e-47	-3.64839	8.03931e-52	8.9192e-51	-3.455	5.62564e-39	5.77314e-38	-3.54907	5.58673e-44	6.88688e-43	-3.22253	2.26962e-42	2.34278e-41	-3.87741	1.29219e-119	1.61983e-118
ENSG00000162747	FCGR3B	-4.37817	2.26881e-40	1.12167e-39	-4.09089	1.08729e-35	4.52182e-35	-4.00123	1.82335e-33	6.66433e-33	-3.99754	8.87486e-27	3.49977e-26	-3.90804	1.02894e-22	2.80149e-22	-4.09478	2.00643e-28	7.48099e-28	-4.45536	2.53183e-101	2.06923e-100
ENSG00000162772	ATF3	-3.65571	1.82514e-29	5.28922e-29	-2.93241	1.22135e-20	2.55627e-20	-3.53225	2.31074e-32	8.00942e-32	-3.24192	8.1393e-23	2.51057e-22	-3.37163	5.88611e-25	1.80569e-24	-3.31773	9.3277e-22	2.38482e-21	-3.50725	4.31457e-53	1.23386e-52
ENSG00000162894	FAIM3	-2.32639	9.15105e-33	3.07802e-32	-2.25831	5.89315e-33	2.13237e-32	-2.17719	1.5996e-26	4.24292e-26	-2.20414	1.07781e-22	3.3021e-22	-2.25683	1.15093e-24	3.474e-24	-2.26257	3.46251e-24	1.0082e-23	-2.23862	1.94786e-68	7.69423e-68
ENSG00000162924	REL	-2.70226	2.37282e-33	8.21652e-33	-3.25004	3.0941e-43	1.94018e-42	-2.34476	2.42791e-33	8.83275e-33	-2.35532	1.21953e-26	4.76516e-26	-2.22326	4.03264e-26	1.32139e-25	-2.42692	7.94325e-28	2.85803e-27	-3.42992	2.1682e-118	2.64045e-117
ENSG00000162976	PQLC3	-3.03668	3.01278e-42	1.63584e-41	-2.54147	1.27031e-35	5.26275e-35	-2.4243	9.61445e-35	3.77663e-34	-2.52471	3.94417e-28	1.70261e-27	-2.35324	1.33234e-28	5.07234e-28	-2.67506	8.04251e-31	3.46329e-30	-2.99414	3.10766e-93	2.12146e-92
ENSG00000163106	HPGDS	-5.24451	1.01533e-78	7.45108e-77	-4.79353	5.70876e-61	1.11254e-59	-4.85143	2.45603e-70	1.26297e-68	-4.78126	1.14528e-51	4.33507e-50	-4.70449	8.87142e-54	3.02659e-52	-4.81331	5.88458e-56	2.52017e-54	-5.18208	2.88895e-161	1.02532e-159
ENSG00000163131	CTSS	-5.96693	8.04609e-63	1.58781e-61	-5.08565	7.44537e-42	4.30469e-41	-4.66967	2.78183e-51	2.97842e-50	-4.52485	6.14043e-37	5.23088e-36	-4.39589	6.84305e-38	5.00096e-37	-4.52656	5.68669e-44	6.83082e-43	-5.79732	2.11326e-131	3.59177e-130
ENSG00000163154	TNFAIP8L2	-4.63958	2.14469e-63	4.39865e-62	-4.2496	6.39507e-52	6.87312e-51	-3.90582	5.81027e-51	6.08675e-50	-3.85126	5.53606e-40	6.28044e-39	-3.68917	1.26376e-36	8.3755e-36	-3.85215	2.52209e-38	1.86249e-37	-4.45352	1.32103e-111	1.35764e-110
ENSG00000163191	S100A11	-6.19061	8.65117e-52	8.3148e-51	-5.09935	3.24337e-37	1.45215e-36	-7.11701	6.3493e-50	6.2083e-49	-6.63768	1.30077e-35	9.85895e-35	-6.71748	3.61653e-42	3.80843e-41	-6.00506	1.03478e-35	6.2629e-35	-4.94299	1.82935e-69	7.4153e-69
ENSG00000163219	ARHGAP25	-4.97018	2.58529e-76	1.55007e-74	-4.39163	2.24027e-64	5.43294e-63	-4.26312	2.58373e-63	6.96077e-62	-4.18739	4.7014e-49	1.34094e-47	-4.1889	2.23916e-54	8.04842e-53	-4.15115	7.27762e-53	2.2438e-51	-4.50369	2.12274e-146	5.32196e-145
ENSG00000163220	S100A9	-5.05505	1.34048e-19	2.61236e-19	-3.65201	2.92797e-10	4.31178e-10	-3.03079	1.45868e-07	1.98214e-07	-2.68895	4.88319e-06	6.72046e-06	-2.94657	2.93223e-06	3.95512e-06	-3.17712	3.49213e-08	5.03367e-08	-4.47408	6.86581e-23	1.12684e-22
ENSG00000163221	S100A12	-3.02001	6.74915e-14	1.0842e-13	-2.49512	8.64558e-10	1.25623e-09	-2.3913	6.97475e-08	9.57372e-08	-2.2734	6.89204e-06	9.43079e-06	-2.19665	1.77145e-05	2.31001e-05	-2.46816	2.48092e-07	3.4528e-07	-2.93944	2.07932e-24	3.50157e-24
ENSG00000163463	KRTCAP2	-2.78976	2.4068e-60	4.03711e-59	-3.00152	2.32713e-68	7.11264e-67	-3.09262	9.79177e-67	3.80072e-65	-3.01811	3.07187e-47	7.25002e-46	-3.04025	9.55555e-51	2.25524e-49	-3.21127	5.20032e-53	1.62107e-51	-2.92864	4.03067e-125	5.84282e-124
ENSG00000163466	ARPC2	-2.82167	5.05561e-52	4.94677e-51	-2.35008	1.43345e-41	8.13753e-41	-2.63728	6.28869e-53	7.63201e-52	-2.69725	2.1596e-43	3.37721e-42	-2.56376	1.89066e-44	2.43951e-43	-2.66748	4.07119e-42	4.12387e-41	-2.51984	1.84139e-70	7.62419e-70
ENSG00000163563	MNDA	-6.09776	2.15898e-57	2.9707e-56	-5.32522	4.40512e-43	2.73789e-42	-5.10491	3.10761e-47	2.5398e-46	-4.98849	6.90114e-36	5.3339e-35	-4.86895	1.20935e-35	7.46378e-35	-4.99206	2.43693e-38	1.80622e-37	-5.82064	3.59153e-126	5.36635e-125
ENSG00000163565	IFI16	-3.78042	4.46886e-45	2.87124e-44	-3.48632	5.70138e-37	2.53016e-36	-3.63332	2.84213e-41	1.60439e-40	-3.36827	1.32409e-29	6.33281e-29	-3.14841	2.97743e-29	1.18075e-28	-3.37788	3.19571e-33	1.62459e-32	-4.21011	1.01146e-89	6.40517e-89
ENSG00000163694	RBM47	-3.36613	2.48024e-65	5.85042e-64	-3.16302	8.46992e-58	1.34697e-56	-2.88432	2.52691e-50	2.55227e-49	-2.7381	1.69163e-29	8.02526e-29	-2.73755	1.57907e-37	1.12199e-36	-2.81367	1.42476e-40	1.27703e-39	-3.22292	3.6101e-139	7.50241e-138
ENSG00000163755	HPS3	-3.28716	1.55086e-44	9.65179e-44	-3.23174	4.47989e-44	2.96067e-43	-2.43513	8.88864e-40	4.60275e-39	-2.50439	8.27063e-30	4.00871e-29	-2.27937	7.54857e-30	3.1072e-29	-2.63488	2.90111e-34	1.58929e-33	-4.00065	2.26283e-115	2.56297e-114
ENSG00000163823	CCR1	-5.73301	2.7309e-66	7.08627e-65	-4.9677	7.35481e-42	4.25757e-41	-4.70307	7.60889e-50	7.4142e-49	-4.58342	2.14439e-37	1.89909e-36	-4.45418	8.46748e-39	6.67264e-38	-4.51705	2.0987e-40	1.84701e-39	-5.56998	1.30672e-138	2.66064e-137
ENSG00000163874	ZC3H12A	-2.96762	4.73809e-53	5.00447e-52	-3.37276	1.55535e-54	1.96546e-53	-3.33478	1.5513e-52	1.82758e-51	-3.20603	3.34605e-37	2.91564e-36	-3.31964	2.81215e-43	3.26385e-42	-3.18749	6.5999e-40	5.55511e-39	-3.32161	1.11159e-103	9.57936e-103
ENSG00000164010	ERMAP	-3.11698	1.06572e-49	9.05124e-49	-2.52855	3.67599e-42	2.16896e-41	-2.27785	1.05269e-35	4.34202e-35	-2.28108	8.81971e-28	3.73295e-27	-2.16336	2.06681e-28	7.75742e-28	-2.18939	2.20127e-28	8.18579e-28	-2.88385	4.51488e-104	3.90994e-103
ENSG00000164053	ATRIP	-2.6923	1.99692e-67	5.67271e-66	-2.78267	3.23644e-72	1.2955e-70	-2.68349	3.68139e-64	1.09896e-62	-2.69994	2.07212e-50	6.7898e-49	-2.66793	4.125e-53	1.29158e-51	-2.7286	1.1202e-52	3.40165e-51	-2.79362	3.10189e-169	1.39635e-167
ENSG00000164056	SPRY1	-2.94146	2.89245e-29	8.31897e-29	-3.33873	1.91614e-34	7.4705e-34	-3.06361	1.92311e-31	6.37267e-31	-3.13447	6.24855e-25	2.2005e-24	-3.08123	3.55412e-26	1.17031e-25	-3.01902	4.31335e-25	1.32034e-24	-2.99836	6.43915e-71	2.69142e-70
ENSG00000164111	ANXA5	-3.23552	2.79333e-41	1.44221e-40	-2.74943	8.37411e-34	3.14559e-33	-3.29096	8.4186e-48	7.16293e-47	-3.05534	2.09724e-33	1.32512e-32	-3.06375	1.63982e-33	8.69266e-33	-2.93108	6.71087e-34	3.57896e-33	-3.5272	1.35555e-77	6.57248e-77
ENSG00000164251	F2RL1	-3.4159	2.90624e-42	1.57951e-41	-3.11112	2.18592e-39	1.10195e-38	-2.92569	7.55588e-34	2.82094e-33	-2.97175	5.40946e-26	2.03795e-25	-2.9149	1.18614e-27	4.25529e-27	-2.90078	6.48902e-27	2.20473e-26	-3.26527	3.0675e-97	2.28441e-96
ENSG00000164342	TLR3	-3.51223	5.05034e-49	4.11326e-48	-3.42692	6.01639e-47	4.76777e-46	-3.11554	5.15689e-43	3.20091e-42	-3.04903	2.69361e-31	1.4508e-30	-2.94806	3.89348e-32	1.87233e-31	-3.05463	1.10562e-33	5.81275e-33	-3.67834	1.72477e-126	2.60192e-125
ENSG00000164535	DAGLB	-3.28299	6.66146e-44	4.01111e-43	-3.00581	6.96767e-42	4.04177e-41	-2.8608	5.43592e-39	2.69976e-38	-2.84489	9.15046e-31	4.74531e-30	-2.87858	5.09274e-32	2.43161e-31	-2.90916	3.46686e-32	1.62394e-31	-2.89143	1.14761e-63	4.09363e-63
ENSG00000164674	SYTL3	-3.27023	1.49936e-51	1.41976e-50	-2.9394	1.93963e-39	9.82012e-39	-2.58866	1.82644e-39	9.30054e-39	-2.51737	1.38079e-25	5.06519e-25	-2.52773	3.0782e-30	1.29895e-29	-2.62577	4.06375e-32	1.89409e-31	-3.10149	8.71374e-108	8.26779e-107
ENSG00000164691	TAGAP	-5.66666	1.38558e-83	1.44614e-81	-5.39033	3.93935e-78	2.30313e-76	-4.41895	3.62627e-65	1.20221e-63	-4.4603	3.0434e-51	1.09113e-49	-4.31768	1.18694e-53	4.01054e-52	-4.61674	4.84565e-54	1.67341e-52	-5.58411	7.24019e-189	5.39758e-187
ENSG00000164733	CTSB	-4.35498	1.23984e-67	3.57978e-66	-3.64063	1.49908e-54	1.89946e-53	-4.15469	9.45406e-63	2.43524e-61	-4.01347	4.00996e-48	1.0463e-46	-4.17017	1.09606e-52	3.21071e-51	-3.74285	6.68828e-49	1.31434e-47	-3.49658	5.39022e-97	3.98887e-96
ENSG00000165025	SYK	-5.93322	9.4507e-68	2.77418e-66	-5.20518	2.60472e-50	2.53281e-49	-4.86611	2.7296e-56	4.185e-55	-4.60767	5.45992e-39	5.61945e-38	-4.55088	3.67697e-42	3.86919e-41	-4.56655	3.25683e-41	3.06031e-40	-5.67224	3.28861e-138	6.61949e-137
ENSG00000165140	FBP1	-4.08367	5.69473e-55	6.7712e-54	-3.76294	5.03616e-50	4.83376e-49	-3.92542	2.71037e-49	2.53917e-48	-3.85761	2.77066e-38	2.65749e-37	-3.86942	2.27291e-40	2.03853e-39	-3.78446	2.41744e-38	1.79272e-37	-3.86052	3.76561e-112	3.93309e-111
ENSG00000165168	CYBB	-6.05325	1.63049e-57	2.26118e-56	-5.22917	3.3064e-36	1.41559e-35	-4.17394	9.35233e-44	6.06417e-43	-4.0293	3.74539e-29	1.73423e-28	-3.76619	5.98687e-32	2.84215e-31	-3.91389	1.62217e-33	8.42476e-33	-6.1959	5.93754e-122	7.90736e-121
ENSG00000165178	NCF1C	-3.3012	4.37812e-37	1.81381e-36	-3.07759	4.97308e-33	1.80641e-32	-3.36556	3.75022e-36	1.583e-35	-3.25655	9.64715e-27	3.79493e-26	-3.29069	1.07856e-28	4.13184e-28	-3.24674	9.09264e-28	3.26242e-27	-2.92062	5.65613e-69	2.26277e-68
ENSG00000165457	FOLR2	-8.12838	1.92602e-77	1.25058e-75	-6.89146	1.08966e-54	1.39703e-53	-7.16469	8.97229e-67	3.52144e-65	-6.99228	2.72403e-47	6.52749e-46	-7.02598	2.92464e-55	1.13835e-53	-6.77878	5.99336e-55	2.33924e-53	-7.1052	7.72012e-127	1.17724e-125
ENSG00000165685	TMEM52B	-5.51688	2.42979e-72	1.05018e-70	-5.19196	1.79342e-67	5.2535e-66	-5.18305	1.18863e-64	3.75512e-63	-5.08244	5.54402e-50	1.7206e-48	-5.09653	6.32409e-53	1.94131e-51	-5.1848	1.8309e-52	5.34107e-51	-5.26285	1.04752e-153	3.18782e-152
ENSG00000166002	SMCO4	-3.36947	2.279e-50	2.00946e-49	-2.77189	1.51613e-41	8.58957e-41	-3.21706	2.71025e-47	2.22408e-46	-3.16238	4.20579e-34	2.79394e-33	-3.25274	1.48315e-39	1.24095e-38	-3.14895	3.53198e-37	2.39488e-36	-2.52265	7.82841e-74	3.49944e-73
ENSG00000166130	IKBIP	-3.02414	5.16827e-65	1.19183e-63	-2.54484	1.86293e-50	1.82791e-49	-2.35194	1.14001e-49	1.09345e-48	-2.33089	9.47475e-34	6.1492e-33	-2.31457	2.90258e-35	1.74775e-34	-2.4532	8.55359e-41	7.78553e-40	-2.73148	4.48261e-126	6.6836e-125
ENSG00000166136	NDUFB8	-3.47	2.0944e-58	3.08039e-57	-3.21629	1.25893e-56	1.84582e-55	-2.17182	1.60584e-46	1.24731e-45	-2.40076	1.00872e-38	1.00801e-37	-2.32378	1.93287e-42	2.09332e-41	-2.53009	4.8349e-37	3.23167e-36	-2.48986	1.13106e-58	3.63435e-58
ENSG00000166278	C2	-4.89661	3.58732e-70	1.28614e-68	-4.93438	1.96664e-73	8.49998e-72	-4.79653	4.68552e-67	1.88626e-65	-4.77325	9.44744e-53	4.04603e-51	-4.83257	8.19693e-56	3.38694e-54	-4.80555	8.8975e-54	2.98825e-52	-4.93668	4.92043e-169	2.18015e-167
ENSG00000166333	ILK	-5.23844	2.21576e-91	4.52465e-89	-5.38952	7.97624e-93	1.29178e-90	-5.51119	3.88135e-92	1.40226e-89	-5.44707	8.44019e-68	1.4328e-65	-5.44685	4.07417e-72	8.20072e-70	-5.45731	1.07131e-71	2.60255e-69	-5.33593	2.94491e-207	3.77216e-205
ENSG00000166337	TAF10	-2.76163	1.92152e-56	2.49303e-55	-2.2983	6.57394e-57	9.86441e-56	-3.18326	1.6016e-62	4.08076e-61	-2.98235	6.18571e-47	1.39674e-45	-3.02922	5.95877e-51	1.4352e-49	-2.81052	3.26279e-52	9.19455e-51	-2.35432	1.59057e-92	1.06719e-91
ENSG00000166340	TPP1	-2.96196	1.64302e-47	1.22035e-46	-2.19838	2.44913e-36	1.05627e-35	-3.75308	9.80977e-43	5.99132e-42	-3.38571	7.27379e-35	5.15532e-34	-3.42851	3.77438e-42	3.96874e-41	-3.10241	2.59568e-41	2.45787e-40	-2.62344	2.05729e-61	6.95303e-61
ENSG00000166401	SERPINB8	-2.65279	3.01215e-57	4.10061e-56	-2.2649	5.51692e-47	4.38182e-46	-2.12134	2.39573e-43	1.5219e-42	-2.08303	8.90408e-32	4.96427e-31	-2.02279	3.38293e-35	2.02832e-34	-2.14294	2.82398e-34	1.54824e-33	-2.55402	4.90464e-102	4.07707e-101
ENSG00000166428	PLD4	-5.7057	7.86688e-55	9.1987e-54	-5.92821	2.3968e-56	3.45306e-55	-5.77745	4.04377e-56	6.11995e-55	-5.54584	2.72974e-43	4.21271e-42	-5.63537	1.11472e-46	1.77952e-45	-5.40349	5.22107e-43	5.73382e-42	-6.01747	4.53639e-133	8.08062e-132
ENSG00000166507	NDST2	-3.34532	2.16802e-61	3.87828e-60	-3.47182	2.09694e-65	5.47146e-64	-3.41498	8.81058e-59	1.67081e-57	-3.36842	3.22334e-45	6.07177e-44	-3.39418	6.08759e-49	1.20132e-47	-3.43544	1.39332e-47	2.35112e-46	-3.44542	5.9715e-148	1.58453e-146
ENSG00000166523	CLEC4E	-2.34179	2.24181e-16	3.89292e-16	-2.17101	3.2011e-14	5.33959e-14	-2.23438	8.39946e-15	1.43662e-14	-2.18424	3.76774e-11	6.43796e-11	-2.2317	5.00254e-12	8.39917e-12	-2.23058	1.56586e-11	2.54827e-11	-2.18702	3.60165e-31	6.83373e-31
ENSG00000166710	B2M	-4.9007	4.61139e-52	4.52784e-51	-4.4467	3.54824e-40	1.86131e-39	-4.3077	4.17711e-42	2.45949e-41	-4.28228	9.58305e-34	6.21575e-33	-4.13907	3.4864e-32	1.68231e-31	-4.42292	3.28905e-40	2.84486e-39	-5.50595	1.71081e-88	1.04352e-87
ENSG00000166794	PPIB	-3.5956	6.78088e-65	1.5485e-63	-3.36733	2.01793e-50	1.97723e-49	-3.71088	4.37993e-64	1.29378e-62	-3.44472	2.04349e-49	6.03622e-48	-3.51584	8.99494e-53	2.67381e-51	-3.34949	1.97114e-48	3.69818e-47	-4.04919	3.51243e-101	2.86235e-100
ENSG00000166797	FAM96A	-2.57152	1.19631e-52	1.22412e-51	-2.58258	2.49794e-46	1.90146e-45	-2.6707	6.99574e-46	5.21534e-45	-2.72244	7.03502e-38	6.52557e-37	-2.63439	3.98423e-39	3.22445e-38	-2.90931	1.01733e-44	1.33965e-43	-3.16731	2.48654e-111	2.53512e-110
ENSG00000166927	MS4A7	-6.66259	2.20859e-70	8.08286e-69	-5.88681	3.00367e-49	2.73927e-48	-5.65278	2.33961e-60	4.91282e-59	-5.57794	1.82158e-42	2.60277e-41	-5.39468	4.12217e-44	5.15909e-43	-5.6592	3.85841e-49	7.70043e-48	-6.30963	6.33533e-129	1.01668e-127
ENSG00000166928	MS4A14	-3.76658	2.90988e-55	3.51631e-54	-3.43488	5.18013e-46	3.88648e-45	-3.69963	7.15563e-52	8.01454e-51	-3.64399	1.83137e-37	1.63731e-36	-3.61257	3.0536e-41	2.95909e-40	-3.70604	6.86592e-41	6.28595e-40	-3.64409	1.47436e-106	1.34894e-105
ENSG00000167083	GNGT2	-2.63953	1.92139e-49	1.60381e-48	-2.31604	6.08439e-43	3.74036e-42	-2.54755	4.57984e-42	2.68875e-41	-2.37704	4.62628e-27	1.86241e-26	-2.56395	1.35886e-36	8.98046e-36	-2.40191	5.67272e-34	3.03911e-33	-2.18619	9.92523e-84	5.46916e-83
ENSG00000167261	DPEP2	-2.676	1.00912e-35	3.93645e-35	-2.61735	2.7913e-35	1.13998e-34	-2.60791	3.63351e-32	1.24504e-31	-2.5642	1.02562e-24	3.5445e-24	-2.5706	1.7792e-26	5.95602e-26	-2.6286	6.10844e-27	2.07944e-26	-2.47482	6.61217e-71	2.76209e-70
ENSG00000167397	VKORC1	-2.62945	3.08304e-49	2.54036e-48	-2.69862	6.63338e-51	6.67126e-50	-3.13061	2.89629e-58	5.2185e-57	-2.99974	1.47416e-40	1.76175e-39	-3.0371	2.2595e-46	3.50621e-45	-2.7672	1.32266e-48	2.51502e-47	-2.63028	3.63771e-100	2.88762e-99
ENSG00000167461	RAB8A	-3.20113	6.87951e-67	1.88584e-65	-3.32066	3.73549e-70	1.30603e-68	-3.22338	1.85785e-66	7.11335e-65	-3.06194	1.5978e-49	4.75963e-48	-3.1568	1.66079e-57	8.06917e-56	-2.9874	3.07177e-54	1.09296e-52	-3.64044	5.35314e-151	1.51762e-149
ENSG00000167476	JSRP1	-4.37054	1.02078e-67	2.97781e-66	-4.39091	7.15766e-71	2.60598e-69	-4.45859	1.05684e-64	3.37661e-63	-4.42816	7.39391e-51	2.55971e-49	-4.469	9.03215e-56	3.71029e-54	-4.48527	3.34934e-54	1.18276e-52	-4.16302	6.91486e-141	1.49204e-139
ENSG00000167565	SERTAD3	-3.28007	4.42825e-54	4.90134e-53	-3.26714	4.86737e-49	4.3766e-48	-3.54782	1.71115e-53	2.15461e-52	-3.2691	2.55291e-38	2.457e-37	-3.40306	1.64192e-41	1.63728e-40	-3.18153	4.28776e-40	3.67261e-39	-3.37582	6.25913e-109	6.05709e-108
ENSG00000167578	RAB4B	-3.07779	2.51325e-68	7.74872e-67	-3.04576	4.28533e-60	7.8518e-59	-3.22821	9.25454e-67	3.62213e-65	-3.13976	3.6569e-46	7.64476e-45	-3.14134	4.88907e-52	1.31967e-50	-3.29048	8.0158e-54	2.70198e-52	-2.44691	1.24392e-111	1.28026e-110
ENSG00000167600	CYP2S1	-3.67931	2.35755e-62	4.53795e-61	-3.16265	5.35294e-56	7.53476e-55	-3.46755	3.67264e-52	4.20369e-51	-3.34399	6.3419e-42	8.55094e-41	-3.42957	1.04607e-45	1.51481e-44	-3.38836	8.82155e-45	1.16929e-43	-3.21069	6.31686e-120	8.004e-119
ENSG00000167604	NFKBID	-4.58703	9.88861e-53	1.01627e-51	-5.57116	7.70583e-58	1.23101e-56	-5.73775	2.34586e-57	3.93022e-56	-5.61848	3.70968e-43	5.68145e-42	-5.75557	1.2164e-47	2.12643e-46	-5.64938	7.30926e-45	9.80833e-44	-5.04908	1.83984e-121	2.42501e-120
ENSG00000167613	LAIR1	-5.33857	9.27077e-72	3.79724e-70	-4.66359	1.43664e-49	1.33789e-48	-4.80334	4.36247e-60	8.93418e-59	-4.56367	1.50614e-41	1.98332e-40	-4.55481	3.11297e-44	3.94796e-43	-4.51437	5.85814e-44	7.01881e-43	-4.95584	1.19776e-116	1.3913e-115
ENSG00000167664	TMIGD2	-4.5757	9.81613e-52	9.39601e-51	-4.16518	5.4659e-46	4.09216e-45	-4.27011	3.07541e-44	2.0566e-43	-4.18905	7.09634e-35	5.03969e-34	-4.22733	1.4109e-37	1.00554e-36	-4.1575	1.67178e-35	9.93478e-35	-4.12356	1.91277e-102	1.60422e-101
ENSG00000167774	NDUFA7	-4.41121	5.81276e-78	3.93759e-76	-4.48754	2.52543e-82	1.8533e-80	-4.52532	7.74207e-77	6.61126e-75	-4.49144	6.44785e-59	4.91082e-57	-4.49508	1.01273e-62	7.92742e-61	-4.46673	2.68513e-60	1.97049e-58	-4.51322	9.1612e-191	7.05362e-189
ENSG00000167807	CTD-2369P2.10	-2.46129	8.54743e-56	1.06109e-54	-2.47778	2.58545e-58	4.24086e-57	-2.45979	1.84219e-53	2.31547e-52	-2.44874	1.92187e-41	2.50038e-40	-2.46841	3.58188e-44	4.52634e-43	-2.43926	2.80814e-42	2.87968e-41	-2.43354	1.10054e-125	1.62714e-124
ENSG00000167850	CD300C	-4.94316	4.11361e-84	4.67425e-82	-4.61657	1.3093e-68	4.03677e-67	-4.58778	2.48792e-67	1.0433e-65	-4.44014	1.27376e-51	4.76055e-50	-4.58691	1.25972e-57	6.18449e-56	-4.48856	2.94747e-55	1.18319e-53	-4.80994	3.0074e-171	1.43156e-169
ENSG00000167851	CD300A	-5.42022	6.99964e-70	2.43518e-68	-4.99858	3.23729e-43	2.02726e-42	-5.13182	7.95488e-58	1.37696e-56	-4.93988	1.73456e-41	2.27349e-40	-4.9684	4.12288e-44	5.15909e-43	-4.91354	6.2045e-44	7.42117e-43	-5.39604	2.40231e-117	2.83015e-116
ENSG00000167895	TMC8	-2.99941	7.28301e-44	4.37229e-43	-2.31768	5.91176e-29	1.75546e-28	-2.82243	6.87551e-38	3.18252e-37	-2.58093	4.69899e-25	1.66731e-24	-2.69025	5.89152e-29	2.29153e-28	-2.57423	1.39697e-26	4.65656e-26	-2.44439	9.99096e-66	3.72809e-65
ENSG00000167995	BEST1	-7.60975	4.17151e-70	1.48801e-68	-6.15613	1.3731e-48	1.20692e-47	-6.87422	1.5781e-64	4.91935e-63	-6.49479	9.50061e-46	1.88806e-44	-6.44201	9.56632e-50	2.061e-48	-6.52107	1.11707e-48	2.14143e-47	-7.02325	6.12397e-134	1.11915e-132
ENSG00000167996	FTH1	-6.27457	5.24444e-58	7.55564e-57	-4.29552	7.55901e-48	6.32837e-47	-7.83053	1.04919e-57	1.81005e-56	-7.10161	1.01794e-42	1.50343e-41	-7.33996	2.1542e-42	2.31524e-41	-6.78641	5.54835e-41	5.12295e-40	-3.62239	3.72639e-69	1.49714e-68
ENSG00000168000	BSCL2	-2.06166	3.92046e-47	2.84445e-46	-2.58043	2.93675e-58	4.78368e-57	-2.24691	1.25001e-48	1.11813e-47	-2.21265	9.77162e-38	8.95202e-37	-2.27603	5.36028e-41	5.08595e-40	-2.16763	6.17604e-39	4.80775e-38	-2.58991	2.09628e-111	2.14811e-110
ENSG00000168209	DDIT4	-4.64551	6.06896e-43	3.44388e-42	-5.236	2.16148e-40	1.14796e-39	-5.37587	1.12411e-47	9.48992e-47	-5.02408	2.83711e-34	1.91634e-33	-5.25728	2.99102e-36	1.91823e-35	-4.79629	4.65763e-34	2.50864e-33	-5.6115	2.31795e-76	1.09818e-75
ENSG00000168282	MGAT2	-4.12064	1.17212e-71	4.75942e-70	-4.12705	1.78106e-74	8.06917e-73	-3.91648	4.06336e-65	1.34081e-63	-3.94182	2.24642e-51	8.15775e-50	-3.87235	4.67171e-53	1.45308e-51	-3.90235	1.31568e-52	3.9487e-51	-4.16393	1.00138e-175	5.30428e-174
ENSG00000168329	CX3CR1	-8.83664	1.85599e-57	2.56633e-56	-7.67627	1.09862e-43	7.078e-43	-7.30483	5.27812e-50	5.18972e-49	-6.92592	2.49412e-38	2.40207e-37	-6.71036	4.71667e-41	4.49952e-40	-6.63167	2.56459e-37	1.75925e-36	-8.63594	5.36116e-132	9.32577e-131
ENSG00000168334	XIRP1	-2.83006	4.26164e-32	1.38579e-31	-2.81555	5.40664e-33	1.96187e-32	-2.70171	1.48365e-28	4.34789e-28	-2.66572	7.83485e-22	2.28415e-21	-2.75411	1.37288e-24	4.13595e-24	-2.71415	2.31098e-23	6.44021e-23	-2.8441	7.56866e-80	3.84159e-79
ENSG00000168404	MLKL	-2.58759	4.07948e-43	2.34612e-42	-2.17553	3.54399e-30	1.11536e-29	-2.38604	7.0953e-39	3.50413e-38	-2.2608	3.79799e-24	1.2687e-23	-2.30483	1.21432e-28	4.63427e-28	-2.34356	1.62653e-28	6.09677e-28	-2.13455	3.54836e-50	9.59256e-50
ENSG00000168421	RHOH	-2.38663	2.35442e-58	3.44127e-57	-2.33589	1.20642e-58	2.01881e-57	-2.23827	1.68718e-49	1.60299e-48	-2.24422	5.51697e-39	5.67402e-38	-2.24089	1.31924e-42	1.45219e-41	-2.30803	1.4411e-43	1.65485e-42	-2.36245	1.21256e-138	2.4725e-137
ENSG00000168476	REEP4	-3.53976	2.60534e-48	2.02925e-47	-3.54384	1.25959e-42	7.62347e-42	-4.49107	4.60692e-52	5.24749e-51	-4.21286	6.62042e-38	6.16128e-37	-4.37829	1.34606e-43	1.60321e-42	-4.07457	1.4456e-39	1.1811e-38	-3.4849	3.27505e-99	2.53825e-98
ENSG00000168792	ABHD15	-2.53021	5.25312e-34	1.87669e-33	-2.0639	6.28302e-28	1.77091e-27	-2.20532	2.64334e-29	7.99584e-29	-2.01416	1.92499e-20	5.19109e-20	-2.04333	1.0296e-21	2.65211e-21	-2.09526	2.29389e-22	6.06282e-22	-2.39536	4.93827e-72	2.11554e-71
ENSG00000168906	MAT2A	-2.11785	1.92665e-29	5.5811e-29	-2.24228	2.36753e-23	5.51197e-23	-2.70136	8.97059e-38	4.13463e-37	-2.58768	2.34279e-30	1.18656e-29	-2.38934	5.01358e-30	2.09246e-29	-2.59705	4.65806e-32	2.16465e-31	-3.34426	5.9572e-59	1.92557e-58
ENSG00000168918	INPP5D	-5.28012	7.6906e-57	1.02711e-55	-4.50026	3.23469e-44	2.16208e-43	-4.65563	4.41019e-48	3.81458e-47	-4.36495	1.21636e-35	9.24903e-35	-4.45048	3.73532e-39	3.03872e-38	-4.19132	1.94393e-35	1.14795e-34	-4.48403	2.37698e-104	2.06739e-103
ENSG00000168961	LGALS9	-3.00552	1.13978e-56	1.49949e-55	-2.37544	5.14829e-37	2.28759e-36	-3.25921	5.28758e-60	1.07662e-58	-3.06337	1.19479e-39	1.30198e-38	-3.13354	3.06546e-49	6.29625e-48	-2.90788	8.5041e-43	9.11893e-42	-2.31441	7.46741e-62	2.55254e-61
ENSG00000168995	SIGLEC7	-3.56969	2.16876e-54	2.44658e-53	-3.50595	3.17261e-48	2.72573e-47	-3.49559	1.51083e-48	1.34391e-47	-3.41947	1.62909e-37	1.46389e-36	-3.50923	8.45687e-42	8.65969e-41	-3.49475	7.85551e-40	6.54548e-39	-3.66142	1.24469e-132	2.19771e-131
ENSG00000169084	DHRSX	-2.10568	1.99172e-42	1.09324e-41	-2.10568	4.33626e-44	2.87114e-43	-2.10568	9.18174e-41	5.04763e-40	-2.10568	7.46526e-32	4.18066e-31	-2.10568	1.57164e-33	8.34065e-33	-2.10568	2.05947e-32	9.81994e-32	-2.10551	1.36887e-104	1.19574e-103
ENSG00000169093	ASMTL	-2.92031	1.59155e-63	3.29779e-62	-2.92031	5.69564e-66	1.54034e-64	-2.92031	4.46585e-61	1.00038e-59	-2.92031	5.60916e-48	1.44485e-46	-2.92031	1.93137e-50	4.43931e-49	-2.92031	8.4612e-49	1.64894e-47	-2.92031	3.52686e-155	1.10185e-153
ENSG00000169100	SLC25A6	-6.2779	3.54206e-95	1.21726e-92	-6.2779	8.7184e-99	2.79187e-96	-6.2779	1.44532e-91	4.96696e-89	-6.2779	2.89575e-72	1.02003e-69	-6.2779	6.84446e-76	2.24275e-73	-6.2779	1.78844e-73	5.5998e-71	-6.2779	1.33817e-230	4.48923e-228
ENSG00000169188	APEX2	-2.44791	1.95022e-52	1.95438e-51	-2.05546	7.0681e-50	6.73357e-49	-2.47246	3.1201e-51	3.32795e-50	-2.31809	2.51033e-39	2.66344e-38	-2.4321	7.7988e-44	9.5221e-43	-2.13993	2.94009e-40	2.54771e-39	-2.056	2.17296e-89	1.35713e-88
ENSG00000169245	CXCL10	-3.29278	4.79038e-16	8.22927e-16	-3.03605	1.90561e-14	3.19987e-14	-2.5609	5.42325e-08	7.47102e-08	-2.53407	1.968e-06	2.75337e-06	-2.4141	5.26372e-06	7.02528e-06	-2.63643	3.12625e-08	4.51644e-08	-3.04546	4.62802e-22	7.49355e-22
ENSG00000169252	ADRB2	-5.30136	6.19936e-59	9.45335e-58	-4.92922	1.16819e-55	1.59959e-54	-4.63515	4.07196e-50	4.04042e-49	-4.51469	4.71621e-38	4.45087e-37	-4.36831	4.92071e-39	3.95059e-38	-4.43077	2.45009e-38	1.81407e-37	-5.22152	1.58103e-133	2.84142e-132
ENSG00000169299	PGM2	-3.09629	1.35031e-49	1.13791e-48	-3.26916	1.72342e-48	1.50359e-47	-2.59145	1.61843e-46	1.25571e-45	-2.71395	7.27639e-38	6.73173e-37	-2.48624	1.75874e-36	1.15205e-35	-2.83436	5.76932e-40	4.89403e-39	-4.08786	4.3029e-120	5.47678e-119
ENSG00000169313	P2RY12	-8.95978	1.94581e-57	2.68262e-56	-7.6931	4.52362e-41	2.49659e-40	-6.73103	2.67795e-52	3.09367e-51	-6.73898	8.25713e-42	1.10803e-40	-6.41657	7.89226e-42	8.11693e-41	-6.72682	1.26288e-41	1.23313e-40	-9.30452	8.85041e-139	1.81517e-137
ENSG00000169385	RNASE2	-5.14879	7.68986e-50	6.59064e-49	-4.52932	7.05696e-34	2.66005e-33	-4.89679	4.70597e-43	2.93135e-42	-4.91003	4.95831e-36	3.88342e-35	-4.76999	3.41972e-38	2.56297e-37	-4.69368	8.48588e-32	3.87698e-31	-4.73113	1.33045e-74	6.0864e-74
ENSG00000169397	RNASE3	-3.61675	1.49168e-41	7.81329e-41	-3.33805	7.05498e-35	2.81042e-34	-3.39927	1.40243e-35	5.74594e-35	-3.44818	1.39948e-28	6.24601e-28	-3.39723	1.21384e-28	4.6337e-28	-3.40182	2.88412e-27	1.00166e-26	-3.44614	2.59878e-83	1.42201e-82
ENSG00000169403	PTAFR	-6.24708	5.73439e-73	2.57317e-71	-5.591	1.76065e-56	2.55485e-55	-5.51529	2.19464e-64	6.76641e-63	-5.32425	2.12656e-45	4.07108e-44	-5.22367	1.1152e-46	1.77952e-45	-5.13534	9.71211e-48	1.66414e-46	-5.65859	1.70149e-131	2.90594e-130
ENSG00000169413	RNASE6	-6.42189	1.11054e-63	2.33545e-62	-5.41004	1.29829e-43	8.33388e-43	-5.75454	5.57142e-62	1.35114e-60	-5.59362	2.66191e-43	4.11705e-42	-5.46388	1.44796e-46	2.28208e-45	-5.46529	8.36707e-45	1.11429e-43	-6.18634	3.02983e-118	3.66126e-117
ENSG00000169429	CXCL8	-6.87383	4.085e-61	7.15892e-60	-6.64668	9.96069e-58	1.57692e-56	-6.18561	1.18867e-43	7.65116e-43	-6.18729	2.0204e-36	1.63794e-35	-6.17152	2.15411e-32	1.05681e-31	-6.33134	5.44327e-38	3.91704e-37	-6.9259	1.37911e-123	1.91257e-122
ENSG00000169508	GPR183	-8.33845	1.56785e-69	5.31033e-68	-7.83257	5.02532e-52	5.45507e-51	-6.42711	1.91792e-54	2.57858e-53	-6.73244	3.65199e-44	6.22208e-43	-6.38436	1.14395e-44	1.51629e-43	-6.92886	2.72964e-48	4.98195e-47	-8.4529	8.6378e-164	3.31626e-162
ENSG00000169682	SPNS1	-3.11926	4.57772e-63	9.16195e-62	-3.43952	2.17752e-72	8.86743e-71	-3.45449	2.02068e-66	7.71582e-65	-3.38042	4.87106e-50	1.52518e-48	-3.42536	7.28496e-56	3.02788e-54	-3.46753	4.5188e-54	1.56822e-52	-3.07541	8.92449e-117	1.03922e-115
ENSG00000169704	GP9	-2.22401	1.00592e-20	2.03876e-20	-2.20459	2.62931e-21	5.65086e-21	-2.09209	1.08771e-17	2.04263e-17	-2.12946	1.64044e-14	3.27345e-14	-2.2005	5.33444e-16	1.05314e-15	-2.1864	2.18071e-15	4.16006e-15	-2.16301	1.89419e-48	4.93968e-48
ENSG00000169756	LIMS1	-3.41969	2.02779e-54	2.29675e-53	-3.0252	6.30831e-44	4.13415e-43	-2.73543	9.39705e-46	6.94307e-45	-2.68416	2.13071e-33	1.34566e-32	-2.53606	1.19938e-32	5.99054e-32	-2.78932	3.19477e-34	1.74069e-33	-3.34686	2.27261e-103	1.94539e-102
ENSG00000169896	ITGAM	-4.4021	2.6913e-56	3.46305e-55	-4.05879	2.48806e-43	1.57064e-42	-3.89961	5.10411e-49	4.68514e-48	-3.6747	1.70252e-34	1.17188e-33	-3.66667	9.96252e-36	6.20017e-35	-3.653	8.82675e-37	5.77654e-36	-4.48846	7.04586e-114	7.7018e-113
ENSG00000169919	GUSB	-2.03146	1.90639e-34	6.98232e-34	-2.66362	4.86167e-43	3.01103e-42	-3.14656	3.63183e-51	3.85916e-50	-2.94144	7.77048e-35	5.49078e-34	-3.03934	5.04018e-39	4.0419e-38	-3.20493	1.12952e-39	9.30699e-39	-2.35735	6.28009e-78	3.06606e-77
ENSG00000170266	GLB1	-2.80619	3.49538e-62	6.60186e-61	-2.83093	8.24874e-54	9.98499e-53	-2.15079	4.64083e-55	6.53893e-54	-2.17526	8.09907e-43	1.20885e-41	-2.16785	2.86267e-46	4.36999e-45	-2.18622	4.48189e-47	7.15984e-46	-3.08811	6.79558e-97	5.00783e-96
ENSG00000170296	GABARAP	-6.89726	2.04879e-85	2.53223e-83	-7.07404	1.00573e-95	2.24931e-93	-7.07102	1.0543e-86	2.0632e-84	-7.07981	1.89266e-69	4.35905e-67	-7.15588	5.67672e-74	1.45427e-71	-7.18241	2.5344e-73	7.76297e-71	-7.10377	9.25003e-202	1.04266e-199
ENSG00000170345	FOS	-8.6143	1.42555e-43	8.41827e-43	-8.09458	1.14594e-42	6.94761e-42	-7.89912	1.38879e-49	1.32574e-48	-7.751	9.32521e-39	9.35176e-38	-7.92024	1.29972e-37	9.28652e-37	-7.6144	1.61028e-36	1.03178e-35	-8.30695	1.80484e-74	8.22984e-74
ENSG00000170458	CD14	-6.25691	8.64001e-59	1.3076e-57	-5.85567	2.14953e-37	9.73003e-37	-5.96162	6.71161e-45	4.66995e-44	-5.63019	3.66404e-33	2.2663e-32	-5.6915	2.56372e-35	1.55033e-34	-5.21368	1.58427e-31	7.12039e-31	-5.88203	3.01204e-69	1.21222e-68
ENSG00000170542	SERPINB9	-3.85875	1.73434e-54	1.96946e-53	-3.90705	1.09679e-47	9.06384e-47	-3.6564	7.91538e-49	7.16299e-48	-3.56255	2.3542e-38	2.27041e-37	-3.59224	3.33775e-40	2.94483e-39	-3.63815	7.64791e-39	5.90784e-38	-4.07389	1.79513e-107	1.68622e-106
ENSG00000170677	SOCS6	-2.77565	5.40123e-37	2.2259e-36	-3.36079	5.06664e-43	3.13247e-42	-2.39014	9.40817e-32	3.16904e-31	-2.44333	5.49129e-26	2.06712e-25	-2.29032	9.14721e-25	2.77349e-24	-2.55134	1.8723e-28	6.99198e-28	-4.39387	1.40958e-123	1.9529e-122
ENSG00000170891	CYTL1	-5.69665	8.28387e-55	9.66223e-54	-5.08267	1.16029e-44	7.94001e-44	-5.25051	1.08774e-49	1.04688e-48	-5.15133	5.9722e-37	5.09372e-36	-5.03314	2.26278e-38	1.72059e-37	-4.79663	9.07832e-38	6.42781e-37	-5.61707	5.99529e-117	7.01026e-116
ENSG00000171049	FPR2	-2.55313	1.77784e-19	3.45133e-19	-2.43088	1.40361e-18	2.7316e-18	-2.25174	3.43027e-15	5.9413e-15	-2.25583	3.65797e-12	6.52911e-12	-2.24849	3.4616e-12	5.84398e-12	-2.31787	7.15435e-13	1.22634e-12	-2.53549	8.54837e-48	2.20356e-47
ENSG00000171051	FPR1	-7.99949	2.84558e-65	6.68237e-64	-7.02808	8.25313e-42	4.75804e-41	-6.64834	1.75486e-41	1.00146e-40	-6.50617	2.81574e-36	2.25419e-35	-6.37684	3.50909e-34	1.94811e-33	-6.50611	3.44487e-36	2.16979e-35	-7.69602	4.71338e-116	5.41693e-115
ENSG00000171115	GIMAP8	-3.70419	2.20712e-41	1.14374e-40	-3.24894	2.45888e-34	9.49716e-34	-3.23787	1.62896e-35	6.65854e-35	-2.96376	1.13474e-23	3.67384e-23	-3.08846	9.0009e-28	3.25437e-27	-2.83074	2.66724e-25	8.25846e-25	-3.4204	4.30514e-80	2.19621e-79
ENSG00000171223	JUNB	-5.71143	7.87511e-43	4.43309e-42	-4.94325	1.16469e-37	5.34892e-37	-5.20301	4.21454e-43	2.63222e-42	-4.8695	1.57814e-30	8.07409e-30	-5.22629	6.92197e-33	3.50325e-32	-4.60305	1.06739e-29	4.28353e-29	-4.52322	3.40367e-53	9.7614e-53
ENSG00000171298	GAA	-3.79559	6.7184e-49	5.4031e-48	-3.48655	5.03138e-57	7.60645e-56	-3.96097	1.11576e-49	1.07238e-48	-3.51348	1.03072e-41	1.37267e-40	-3.83163	8.27127e-45	1.10993e-43	-3.35932	2.89036e-42	2.95324e-41	-3.13932	3.35739e-71	1.41634e-70
ENSG00000171570	RAB4B-EGLN2	-5.10624	1.6714e-91	3.46324e-89	-5.10624	5.60895e-95	1.129e-92	-5.10624	5.00225e-88	1.1368e-85	-5.10624	1.9181e-69	4.35905e-67	-5.10624	6.18173e-73	1.34001e-70	-5.10624	1.31363e-70	2.72192e-68	-5.10624	7.41327e-222	1.68473e-219
ENSG00000171608	PIK3CD	-2.49423	5.56886e-31	1.72489e-30	-2.62176	5.43202e-40	2.82529e-39	-2.72016	1.1022e-32	3.8767e-32	-2.55437	3.67442e-25	1.31402e-24	-2.79111	1.77145e-30	7.60041e-30	-2.2785	8.91566e-24	2.53887e-23	-2.52821	4.43653e-73	1.94314e-72
ENSG00000171631	P2RY6	-3.54496	9.399e-48	7.0933e-47	-3.15097	2.71434e-39	1.35813e-38	-3.2986	7.32792e-42	4.25599e-41	-3.16943	3.23875e-31	1.73119e-30	-3.2272	9.06879e-34	4.89388e-33	-3.16573	4.87114e-32	2.25994e-31	-3.15681	4.73129e-68	1.8528e-67
ENSG00000171659	GPR34	-8.4503	2.91512e-62	5.55805e-61	-7.36241	9.71354e-47	7.612e-46	-6.29171	4.82016e-52	5.48152e-51	-6.2525	5.86104e-39	5.99724e-38	-5.85581	3.5611e-39	2.90538e-38	-6.26071	3.34397e-43	3.72757e-42	-8.2962	8.00399e-151	2.25552e-149
ENSG00000171700	RGS19	-4.24262	1.4828e-58	2.20619e-57	-3.82473	1.39975e-49	1.30612e-48	-4.08565	1.15076e-53	1.46337e-52	-3.77878	1.17425e-38	1.16762e-37	-3.86526	1.42575e-40	1.30532e-39	-3.51759	1.3789e-38	1.04463e-37	-3.68697	2.9955e-101	2.44534e-100
ENSG00000171860	C3AR1	-8.72722	1.22167e-75	6.85789e-74	-7.74529	1.38652e-53	1.6556e-52	-8.13549	3.28028e-71	1.8414e-69	-7.82523	2.43886e-48	6.49594e-47	-7.65995	1.78829e-53	5.9148e-52	-7.30245	5.02766e-54	1.73202e-52	-8.55194	3.22902e-147	8.34805e-146
ENSG00000172243	CLEC7A	-5.2814	1.69924e-63	3.51059e-62	-4.67002	9.34389e-49	8.26982e-48	-4.39767	1.10754e-50	1.14096e-49	-4.39651	9.19907e-39	9.23345e-38	-4.13894	1.68303e-35	1.02835e-34	-4.58286	2.53245e-43	2.84774e-42	-5.16251	1.07034e-130	1.79111e-129
ENSG00000172269	DPAGT1	-2.04582	1.51944e-45	1.00042e-44	-2.02288	1.22439e-46	9.49978e-46	-2.67536	1.65048e-48	1.46351e-47	-2.52157	5.0619e-35	3.65193e-34	-2.59768	3.0426e-40	2.69624e-39	-2.29218	9.84782e-40	8.15252e-39	-2.05153	6.3442e-64	2.27166e-63
ENSG00000172296	SPTLC3	-2.76657	3.33053e-38	1.46236e-37	-2.71038	3.51105e-35	1.42444e-34	-2.12989	1.5622e-19	3.14854e-19	-2.39497	6.44101e-22	1.88756e-21	-2.29215	5.97924e-19	1.35316e-18	-2.38583	1.98637e-22	5.26385e-22	-2.88837	5.75848e-97	4.25693e-96
ENSG00000172531	PPP1CA	-2.2818	1.058e-42	5.90617e-42	-2.13413	1.08603e-44	7.4536e-44	-2.61466	1.46908e-48	1.3076e-47	-2.41377	5.70886e-38	5.3447e-37	-2.62888	3.74132e-43	4.28928e-42	-2.17437	6.2368e-37	4.13537e-36	-2.14811	3.8904e-50	1.05112e-49
ENSG00000172578	KLHL6	-3.04531	7.8303e-54	8.54601e-53	-2.85773	1.50724e-44	1.0215e-43	-2.73231	2.48272e-45	1.77609e-44	-2.65736	3.15332e-32	1.812e-31	-2.58098	1.52198e-32	7.543e-32	-2.70413	6.08314e-35	3.47714e-34	-3.02268	5.37545e-127	8.25055e-126
ENSG00000172716	SLFN11	-2.92848	8.84895e-46	5.92312e-45	-2.61556	1.17668e-40	6.35713e-40	-2.46387	8.07664e-39	3.97902e-38	-2.21905	5.61528e-27	2.24835e-26	-2.03835	4.34563e-26	1.42197e-25	-2.40495	1.51377e-34	8.43713e-34	-3.24932	1.06442e-110	1.0728e-109
ENSG00000172936	MYD88	-3.43234	4.55708e-57	6.16212e-56	-4.06318	4.46753e-48	3.78746e-47	-4.64064	6.15936e-58	1.08482e-56	-4.41684	1.62793e-44	2.87799e-43	-4.48944	9.88135e-49	1.91774e-47	-4.31063	7.87619e-46	1.14526e-44	-4.31119	5.75678e-100	4.54161e-99
ENSG00000172974	AC007318.5	-2.89764	7.51691e-54	8.2167e-53	-3.06283	2.27621e-60	4.27054e-59	-3.36649	6.46299e-66	2.31714e-64	-3.39471	8.53489e-56	4.82958e-54	-3.42408	1.86762e-54	6.74738e-53	-3.45269	8.79244e-56	3.68707e-54	-3.19559	5.61365e-97	4.15204e-96
ENSG00000173083	HPSE	-3.00455	5.51791e-34	1.96878e-33	-2.79668	6.82055e-31	2.21636e-30	-2.54426	1.41921e-27	3.95816e-27	-2.43388	2.1592e-20	5.80484e-20	-2.43525	4.96061e-21	1.23796e-20	-2.42843	2.24164e-21	5.62105e-21	-3.07628	1.33996e-86	7.86996e-86
ENSG00000173110	HSPA6	-7.00471	3.99499e-31	1.24369e-30	-7.07798	6.92377e-42	4.01961e-41	-7.31171	2.70639e-41	1.52961e-40	-7.14498	3.68933e-34	2.46363e-33	-7.23871	3.51646e-37	2.43953e-36	-6.9398	1.13605e-23	3.21553e-23	-7.16606	8.0006e-69	3.19254e-68
ENSG00000173198	CYSLTR1	-3.06723	2.77661e-46	1.91214e-45	-2.96335	6.43025e-46	4.80139e-45	-2.75443	1.44839e-39	7.41292e-39	-2.74971	7.27354e-31	3.7929e-30	-2.71985	4.91547e-32	2.34935e-31	-2.83717	4.91162e-33	2.46105e-32	-3.07485	1.02598e-113	1.11802e-112
ENSG00000173334	TRIB1	-2.6685	3.22845e-39	1.49634e-38	-2.83731	3.19801e-34	1.22645e-33	-3.18926	4.01083e-38	1.89005e-37	-2.87143	3.92362e-29	1.81437e-28	-2.94995	2.22162e-30	9.47415e-30	-2.71126	8.54246e-24	2.43601e-23	-3.03029	1.00655e-68	4.00402e-68
ENSG00000173366	TLR9	-3.06526	2.07631e-69	6.89982e-68	-3.06526	4.5102e-72	1.75549e-70	-3.06526	9.59889e-67	3.73614e-65	-3.06526	1.73158e-52	7.11311e-51	-3.06526	3.61666e-55	1.39232e-53	-3.06526	2.21106e-53	7.04839e-52	-3.06526	3.18432e-169	1.42435e-167
ENSG00000173369	C1QB	-6.97494	3.91702e-45	2.52013e-44	-5.25632	4.16039e-28	1.18329e-27	-5.54358	6.30694e-40	3.3023e-39	-5.09099	1.93414e-28	8.55099e-28	-5.11376	1.01571e-31	4.73415e-31	-4.92455	1.24855e-29	4.98357e-29	-5.66955	2.08939e-58	6.66654e-58
ENSG00000173372	C1QA	-6.31446	6.84405e-48	5.20694e-47	-4.67912	1.57005e-29	4.78004e-29	-5.09232	2.68275e-38	1.27616e-37	-4.77859	3.17726e-27	1.29162e-26	-4.85699	2.56525e-30	1.08836e-29	-4.73761	2.17274e-31	9.68793e-31	-4.96449	2.45818e-55	7.37089e-55
ENSG00000173391	OLR1	-8.1391	7.08915e-69	2.26499e-67	-6.93084	4.56296e-49	4.11075e-48	-6.59739	1.29307e-56	2.03115e-55	-6.31655	2.18477e-44	3.81928e-43	-6.18076	1.18081e-44	1.56261e-43	-6.38612	2.86498e-44	3.54412e-43	-7.66665	1.18332e-126	1.79472e-125
ENSG00000173418	NAA20	-2.48135	2.79472e-42	1.52272e-41	-2.41101	4.32745e-37	1.92589e-36	-2.5022	5.39789e-45	3.77825e-44	-2.63809	1.74537e-36	1.42564e-35	-2.6337	7.05459e-41	6.61779e-40	-2.82191	4.55937e-41	4.24446e-40	-2.87784	1.53142e-56	4.71851e-56
ENSG00000173530	TNFRSF10D	-3.53362	3.31447e-43	1.91397e-42	-3.17766	2.01038e-34	7.80551e-34	-3.32473	2.34084e-42	1.40113e-41	-3.19924	1.37904e-27	5.76576e-27	-3.1635	2.03084e-28	7.6346e-28	-3.32088	2.56492e-33	1.31561e-32	-3.28587	1.01627e-71	4.33392e-71
ENSG00000173535	TNFRSF10C	-3.19643	9.06725e-30	2.6614e-29	-2.98387	1.38849e-27	3.84057e-27	-2.91425	7.67994e-25	1.89444e-24	-2.80917	1.3447e-18	3.28311e-18	-2.89861	4.46581e-20	1.06613e-19	-2.8861	3.74908e-20	8.85871e-20	-3.10638	4.86283e-68	1.90326e-67
ENSG00000173559	NABP1	-3.7618	2.78278e-68	8.52379e-67	-3.46615	6.76675e-63	1.49207e-61	-3.04979	1.79171e-53	2.25404e-52	-3.09048	2.70362e-40	3.14048e-39	-2.84716	2.49946e-38	1.89647e-37	-3.28396	4.83612e-46	7.15765e-45	-3.67374	1.28713e-156	4.08461e-155
ENSG00000173846	PLK3	-2.93283	2.86636e-46	1.97202e-45	-2.61162	6.29291e-38	2.93794e-37	-2.93699	5.45598e-37	2.40685e-36	-2.60429	5.44283e-28	2.33241e-27	-2.77648	2.65836e-29	1.05839e-28	-2.52739	4.0905e-29	1.58165e-28	-2.45438	1.18886e-67	4.61969e-67
ENSG00000173867	RP11-97O12.7	-2.62586	2.77477e-59	4.33683e-58	-2.70059	2.02641e-62	4.33922e-61	-2.59625	2.77149e-52	3.19822e-51	-2.59132	1.27491e-42	1.86645e-41	-2.62149	6.94786e-45	9.42207e-44	-2.63549	1.37278e-44	1.77944e-43	-2.47047	1.75777e-110	1.75902e-109
ENSG00000173926	MARCH3	-2.18	1.37183e-38	6.14597e-38	-2.65526	7.38769e-48	6.19598e-47	-2.49136	3.18715e-42	1.89002e-41	-2.3403	2.62367e-28	1.14984e-27	-2.20771	1.38173e-27	4.92749e-27	-2.28346	1.26348e-30	5.36866e-30	-2.74038	1.44214e-87	8.63935e-87
ENSG00000173928	SWSAP1	-2.23427	1.33458e-41	7.01652e-41	-2.43087	3.49725e-46	2.64075e-45	-2.30042	4.28182e-38	2.01353e-37	-2.21092	1.9287e-28	8.5296e-28	-2.22351	4.82521e-30	2.01563e-29	-2.30024	9.79157e-33	4.79539e-32	-2.11153	8.67149e-85	4.88725e-84
ENSG00000173933	RBM4	-2.87852	2.41229e-63	4.91883e-62	-3.57336	1.65023e-76	8.676e-75	-2.91015	8.76102e-57	1.39169e-55	-2.97859	1.69286e-45	3.28094e-44	-2.75477	2.95319e-45	4.15273e-44	-3.10374	2.06868e-48	3.86575e-47	-3.67205	6.15797e-141	1.33486e-139
ENSG00000174021	GNG5	-3.68998	2.79925e-59	4.36783e-58	-2.84211	7.0331e-44	4.59204e-43	-4.09379	1.34692e-57	2.29559e-56	-3.94624	1.52535e-41	2.00674e-40	-3.85196	1.52026e-47	2.62828e-46	-4.05549	1.99008e-44	2.50807e-43	-2.94365	9.68911e-69	3.85649e-68
ENSG00000174123	TLR10	-4.5196	1.38277e-52	1.4047e-51	-4.12887	5.02375e-45	3.53216e-44	-3.93104	1.7248e-42	1.04035e-41	-3.86235	1.30945e-32	7.79803e-32	-3.72726	1.99078e-32	9.79404e-32	-3.95563	8.23661e-34	4.37609e-33	-4.42061	8.87593e-124	1.2444e-122
ENSG00000174125	TLR1	-5.54204	3.98828e-63	8.01638e-62	-5.29608	1.29329e-55	1.76403e-54	-4.25084	1.22328e-48	1.09635e-47	-4.25211	5.99421e-36	4.65849e-35	-3.97861	9.46752e-36	5.90254e-35	-4.33542	1.05517e-40	9.50596e-40	-5.75351	1.69604e-165	6.82776e-164
ENSG00000174600	CMKLR1	-4.33115	1.31706e-55	1.61229e-54	-3.89156	2.17613e-44	1.46496e-43	-3.80345	1.05453e-47	8.91318e-47	-3.59251	4.40384e-34	2.92138e-33	-3.60444	1.47798e-33	7.86727e-33	-3.60504	1.30136e-37	9.12703e-37	-4.1907	3.887e-122	5.21599e-121
ENSG00000175197	DDIT3	-2.50064	3.53773e-36	1.4069e-35	-2.68911	6.45904e-34	2.44251e-33	-2.71808	3.08569e-35	1.24541e-34	-2.77502	6.31934e-30	3.09595e-29	-2.84737	2.7163e-32	1.32157e-31	-2.86538	7.73209e-27	2.61322e-26	-2.77011	2.14875e-59	7.00183e-59
ENSG00000175482	POLD4	-3.95875	1.03089e-59	1.65248e-58	-3.69334	4.51277e-61	8.819e-60	-3.73913	2.48065e-52	2.87437e-51	-3.51646	4.41446e-35	3.20452e-34	-3.60887	2.6118e-42	2.79001e-41	-3.52224	5.73734e-42	5.75777e-41	-3.39694	6.13108e-101	4.95907e-100
ENSG00000175489	LRRC25	-5.39116	5.0995e-72	2.14157e-70	-5.0025	2.64605e-58	4.33018e-57	-5.08719	1.04824e-62	2.6903e-61	-4.87019	2.40735e-46	5.13932e-45	-4.97064	1.98712e-50	4.56003e-49	-4.77125	5.81657e-47	9.18783e-46	-5.09217	4.58127e-130	7.5409e-129
ENSG00000175567	UCP2	-6.35944	4.1354e-72	1.76035e-70	-5.45067	5.29666e-55	6.92943e-54	-6.32638	2.57591e-70	1.3198e-68	-6.08881	2.39005e-52	9.75216e-51	-6.05739	1.08723e-56	4.89818e-55	-5.96057	2.84457e-54	1.01726e-52	-5.63825	7.60468e-118	9.09592e-117
ENSG00000175857	GAPT	-2.43274	8.42297e-29	2.36508e-28	-2.32689	5.66027e-28	1.60147e-27	-2.25479	4.43586e-25	1.10407e-24	-2.19159	1.94877e-18	4.7252e-18	-2.131	4.91142e-19	1.11562e-18	-2.27078	3.08649e-20	7.31886e-20	-2.43906	6.12905e-71	2.56561e-70
ENSG00000175899	A2M	-6.48518	9.27856e-52	8.90565e-51	-5.53926	7.73986e-44	5.03252e-43	-5.25514	1.30151e-53	1.64913e-52	-4.82642	3.02868e-38	2.89905e-37	-4.84241	6.42977e-45	8.74474e-44	-4.57607	4.46791e-44	5.41763e-43	-6.1312	1.28111e-91	8.42711e-91
ENSG00000175938	ORAI3	-2.89228	1.03125e-40	5.16177e-40	-3.22302	4.83842e-46	3.63785e-45	-3.40361	1.48081e-46	1.15529e-45	-3.21149	1.26044e-33	8.09465e-33	-3.33521	4.80422e-37	3.29239e-36	-3.2387	1.16129e-35	6.98661e-35	-2.9592	1.70699e-90	1.09824e-89
ENSG00000176563	CNTD1	-2.77534	7.77617e-65	1.7672e-63	-2.81107	7.5258e-72	2.90517e-70	-2.6683	5.6299e-56	8.44785e-55	-2.6904	7.04719e-46	1.42665e-44	-2.64358	6.12323e-49	1.20666e-47	-2.72567	7.43413e-48	1.29158e-46	-2.8641	2.06547e-152	6.03787e-151
ENSG00000176597	B3GNT5	-4.75651	8.55944e-53	8.86132e-52	-4.86436	5.40698e-54	6.59604e-53	-3.66842	8.3487e-40	4.33271e-39	-3.81726	4.49338e-32	2.55702e-31	-3.53695	5.12688e-32	2.44625e-31	-4.06531	5.79765e-34	3.10486e-33	-4.75439	4.92494e-124	6.94619e-123
ENSG00000176868	RP11-334J6.7	-3.0199	5.88298e-58	8.42391e-57	-3.0199	3.38074e-60	6.2349e-59	-3.0199	1.0279e-55	1.51814e-54	-3.0199	1.0299e-43	1.67567e-42	-3.0199	5.69929e-46	8.48869e-45	-3.0199	1.81981e-44	2.30793e-43	-3.0199	7.14472e-142	1.59792e-140
ENSG00000177105	RHOG	-3.875	2.04838e-56	2.65273e-55	-2.58825	1.83445e-26	4.84669e-26	-4.56609	3.98048e-49	3.68253e-48	-3.89767	3.06649e-34	2.06309e-33	-4.12889	1.89123e-43	2.21876e-42	-3.35701	6.22194e-36	3.83328e-35	-2.82258	1.94749e-76	9.23908e-76
ENSG00000177575	CD163	-3.53654	4.39066e-24	1.00921e-23	-2.87827	3.90109e-14	6.48342e-14	-2.25695	8.75434e-10	1.27717e-09	-2.16769	1.03992e-07	1.53735e-07	-2.18801	3.21993e-08	4.6859e-08	-2.13128	8.58681e-08	1.21792e-07	-3.43359	1.0978e-42	2.56051e-42
ENSG00000178127	NDUFV2	-3.94367	3.208e-77	2.02694e-75	-4.28419	2.3859e-91	3.57631e-89	-2.82986	1.07112e-45	7.88095e-45	-2.99649	3.8096e-40	4.37468e-39	-2.81474	2.03073e-41	2.00934e-40	-3.40264	1.23388e-45	1.76322e-44	-4.32387	4.17913e-203	4.78731e-201
ENSG00000178464	CTD-2192J16.15	-2.7771	5.72828e-59	8.77298e-58	-2.72159	1.11993e-51	1.18112e-50	-3.67868	1.77675e-63	4.86105e-62	-3.61862	6.12678e-52	2.40463e-50	-3.64671	1.3585e-52	3.90638e-51	-3.62957	7.47009e-51	1.78094e-49	-2.88692	1.41438e-103	1.21294e-102
ENSG00000178789	CD300LB	-3.33004	6.2151e-48	4.75153e-47	-3.27511	4.86794e-47	3.87729e-46	-3.17938	3.16292e-40	1.68809e-39	-3.21625	2.22819e-34	1.51667e-33	-3.2908	2.63082e-37	1.84053e-36	-3.28226	3.21261e-36	2.02713e-35	-3.28596	1.5537e-114	1.72783e-113
ENSG00000179101	RP11-349N19.2	-2.47802	1.82759e-39	8.57785e-39	-2.49476	5.43697e-40	2.82682e-39	-2.64299	3.69543e-38	1.74551e-37	-2.60553	1.8963e-29	8.9721e-29	-2.60698	8.88159e-31	3.88518e-30	-2.6388	1.99962e-31	8.93582e-31	-2.759	1.13223e-102	9.55276e-102
ENSG00000179144	GIMAP7	-2.73181	1.23552e-26	3.14006e-26	-2.06911	4.0331e-18	7.71993e-18	-3.12879	6.1592e-28	1.7479e-27	-2.83646	1.51041e-16	3.30614e-16	-2.90244	9.50831e-23	2.59385e-22	-2.22276	9.99109e-17	2.01308e-16	-2.10849	3.99215e-33	7.84949e-33
ENSG00000179163	FUCA1	-3.90642	3.99785e-56	5.0839e-55	-3.82558	1.40963e-49	1.31447e-48	-3.48611	1.17485e-46	9.2221e-46	-3.5325	1.84734e-34	1.266e-33	-3.59904	1.07543e-40	9.93627e-40	-3.59257	8.17352e-39	6.29316e-38	-4.11711	4.43065e-95	3.13707e-94
ENSG00000179344	HLA-DQB1	-5.40106	1.61103e-48	1.27239e-47	-4.66776	2.62617e-36	1.12985e-35	-4.64447	1.79431e-35	7.31323e-35	-4.70684	1.57691e-28	6.99801e-28	-4.61024	7.76583e-31	3.4098e-30	-4.51202	1.20541e-28	4.55219e-28	-5.00434	1.72988e-86	1.01474e-85
ENSG00000179388	EGR3	-5.24774	1.11603e-57	1.56778e-56	-2.07594	3.86915e-16	6.88685e-16	-2.31745	6.90589e-21	1.46476e-20	-2.33476	5.92188e-15	1.20612e-14	-2.31139	6.61223e-16	1.30084e-15	-2.16403	4.95721e-16	9.72531e-16	-2.72351	4.57325e-30	8.50542e-30
ENSG00000179583	CIITA	-2.85308	4.5605e-50	3.96162e-49	-2.54203	7.84202e-35	3.1169e-34	-2.46268	1.1844e-36	5.13166e-36	-2.27004	2.90586e-23	9.2008e-23	-2.23187	7.03966e-27	2.40925e-26	-2.33682	2.04997e-27	7.19943e-27	-2.7187	2.23421e-98	1.70808e-97
ENSG00000179639	FCER1A	-2.17349	2.93871e-13	4.629e-13	-2.40396	1.06335e-15	1.86189e-15	-2.35952	6.7995e-14	1.12924e-13	-2.39172	3.14506e-11	5.38771e-11	-2.4374	3.59415e-12	6.06196e-12	-2.39536	2.16894e-11	3.51269e-11	-2.47818	1.03165e-38	2.24389e-38
ENSG00000179715	PCED1B	-3.53181	7.18786e-55	8.44679e-54	-3.08541	4.26209e-49	3.84954e-48	-3.26328	1.32419e-47	1.11191e-46	-3.25234	2.01947e-37	1.79296e-36	-3.17631	5.19164e-39	4.15154e-38	-3.17716	3.84324e-38	2.79996e-37	-3.01586	3.93099e-96	2.84185e-95
ENSG00000180353	HCLS1	-6.16821	1.48094e-67	4.25847e-66	-5.01427	1.28014e-43	8.22861e-43	-5.40924	1.50201e-58	2.79569e-57	-5.14367	2.1737e-41	2.81502e-40	-5.08806	2.43564e-44	3.10853e-43	-5.04159	8.99219e-42	8.90998e-41	-5.44661	2.02516e-104	1.76357e-103
ENSG00000180448	HMHA1	-3.72301	4.6748e-48	3.59934e-47	-3.54615	1.58324e-47	1.29848e-46	-3.87554	3.38742e-46	2.57854e-45	-3.53632	1.64928e-31	8.99664e-31	-3.76438	1.8877e-36	1.23252e-35	-3.44106	1.7576e-32	8.43194e-32	-3.44035	2.4343e-83	1.33304e-82
ENSG00000180581	SRP9P1	-2.8303	6.38719e-43	3.62009e-42	-2.64204	1.386e-45	1.00924e-44	-3.26284	1.60998e-46	1.24984e-45	-3.26861	9.14695e-40	1.01162e-38	-3.25815	2.58687e-40	2.30544e-39	-3.37871	1.42697e-44	1.83473e-43	-3.27281	3.21355e-99	2.49334e-98
ENSG00000180871	CXCR2	-3.07112	6.99678e-22	1.48225e-21	-2.94354	2.94557e-21	6.31899e-21	-2.94645	9.98e-20	2.02825e-19	-2.82891	1.47177e-14	2.94437e-14	-2.96088	2.52174e-16	5.05424e-16	-2.84968	4.69783e-15	8.82213e-15	-3.06712	4.05082e-54	1.18587e-53
ENSG00000181038	METTL23	-2.3754	1.09664e-42	6.11706e-42	-2.39576	7.75159e-52	8.27424e-51	-2.35647	5.42529e-48	4.66966e-47	-2.44338	4.8233e-36	3.78187e-35	-2.28849	7.72891e-38	5.61922e-37	-2.64879	1.52896e-47	2.57077e-46	-2.57444	4.48085e-98	3.40168e-97
ENSG00000181631	P2RY13	-6.99185	6.58066e-65	1.50522e-63	-6.29136	4.73048e-53	5.47679e-52	-5.22846	1.08221e-53	1.37994e-52	-5.32574	6.05084e-43	9.14767e-42	-5.09231	1.02558e-43	1.23614e-42	-5.57395	1.28352e-44	1.66988e-43	-6.68442	8.29823e-150	2.29259e-148
ENSG00000181804	SLC9A9	-4.7298	3.42131e-59	5.29158e-58	-3.62368	9.52196e-44	6.15151e-43	-3.21826	1.30347e-51	1.42041e-50	-3.05765	1.26045e-36	1.04422e-35	-2.88671	2.45095e-34	1.38081e-33	-3.16654	5.31336e-40	4.5154e-39	-4.45604	1.60202e-121	2.11352e-120
ENSG00000182179	UBA7	-4.86677	3.80739e-62	7.15282e-61	-4.70099	1.0748e-53	1.29325e-52	-4.9144	6.00756e-57	9.74068e-56	-4.60022	1.14268e-41	1.51319e-40	-4.74238	8.16942e-46	1.19159e-44	-4.51674	8.92538e-43	9.54887e-42	-4.63235	5.39085e-109	5.2312e-108
ENSG00000182196	ARL6IP4	-4.02667	1.21723e-63	2.55219e-62	-4.50745	3.2832e-78	1.94371e-76	-4.58714	9.92952e-76	7.85994e-74	-4.5561	1.22746e-58	9.00777e-57	-4.59081	8.12822e-63	6.43408e-61	-4.59707	1.25184e-61	1.02549e-59	-4.482	7.90019e-163	2.91397e-161
ENSG00000182487	NCF1B	-3.22023	3.28397e-41	1.68934e-40	-3.06731	1.02683e-38	4.97183e-38	-3.2279	3.03128e-39	1.52484e-38	-3.20503	1.21522e-30	6.26279e-30	-3.21504	2.48983e-32	1.21516e-31	-3.20756	2.20792e-31	9.83545e-31	-3.09461	1.67497e-89	1.04984e-88
ENSG00000182511	FES	-3.12909	2.78941e-47	2.04277e-46	-2.65254	8.20208e-38	3.80406e-37	-2.72677	1.81236e-41	1.03343e-40	-2.44239	3.43717e-28	1.4952e-27	-2.79383	6.62469e-33	3.36004e-32	-2.58331	1.65782e-31	7.4462e-31	-2.14094	1.37004e-53	3.95978e-53
ENSG00000182557	SPNS3	-3.50719	6.69143e-48	5.09634e-47	-3.20595	4.01156e-45	2.84894e-44	-3.21624	3.93263e-40	2.08468e-39	-3.15167	8.90679e-32	4.96427e-31	-3.22826	9.4144e-35	5.44983e-34	-3.18903	2.32957e-33	1.20013e-32	-3.11787	1.08829e-98	8.37008e-98
ENSG00000182578	CSF1R	-8.37569	4.78912e-60	7.85549e-59	-6.94906	2.80025e-48	2.41171e-47	-7.28747	1.70003e-58	3.13527e-57	-6.85201	2.25098e-43	3.51623e-42	-6.83832	2.07315e-47	3.5364e-46	-6.43596	3.75726e-45	5.18509e-44	-7.64764	3.12636e-120	3.99732e-119
ENSG00000182853	VMO1	-4.09591	3.38185e-43	1.95128e-42	-4.11976	8.60644e-45	5.94727e-44	-4.26831	4.30338e-42	2.5296e-41	-4.13863	1.61289e-33	1.02831e-32	-4.37695	4.07862e-36	2.59331e-35	-4.1877	9.543e-35	5.38274e-34	-3.40726	1.01855e-73	4.54012e-73
ENSG00000182957	SPATA13	-2.85825	1.59758e-43	9.40658e-43	-2.32697	3.96423e-27	1.07622e-26	-2.52704	1.31095e-39	6.72906e-39	-2.21294	6.39777e-27	2.55222e-26	-2.09541	2.54101e-24	7.55811e-24	-2.21608	6.76406e-27	2.29431e-26	-3.43763	4.00125e-101	3.25505e-100
ENSG00000183160	TMEM119	-6.45771	7.93507e-64	1.68128e-62	-5.3644	1.67569e-49	1.55639e-48	-5.76097	1.0552e-60	2.29441e-59	-5.36604	6.09555e-43	9.2054e-42	-5.44028	4.58578e-46	6.91795e-45	-5.20251	2.06044e-44	2.58979e-43	-5.94485	1.7328e-116	2.00947e-115
ENSG00000183283	DAZAP2	-2.27146	4.5272e-44	2.75306e-43	-2.15406	1.03449e-40	5.61264e-40	-3.12866	3.29458e-54	4.35466e-53	-2.9284	1.05737e-38	1.05289e-37	-2.94057	2.61588e-43	3.04357e-42	-2.62346	3.24649e-41	3.0536e-40	-2.95203	9.11156e-78	4.43767e-77
ENSG00000183479	TREX2	-2.46301	6.10958e-62	1.13868e-60	-2.403	2.62268e-63	5.91257e-62	-2.42973	1.31069e-55	1.91375e-54	-2.36968	8.27543e-44	1.3574e-42	-2.45781	5.06798e-48	9.17839e-47	-2.36592	2.39239e-43	2.70319e-42	-2.2529	1.06048e-123	1.48235e-122
ENSG00000183484	GPR132	-4.1293	2.7299e-61	4.85049e-60	-3.92886	4.60478e-58	7.44906e-57	-3.89657	1.07316e-53	1.36964e-52	-3.78922	5.34019e-42	7.26287e-41	-3.88083	3.88398e-45	5.37576e-44	-3.82992	4.67183e-44	5.64547e-43	-3.92751	8.111e-136	1.54229e-134
ENSG00000183549	ACSM5	-3.69707	6.48895e-44	3.9156e-43	-3.76405	3.35193e-46	2.53373e-45	-3.54941	3.10794e-44	2.07737e-43	-3.49401	5.6525e-33	3.44629e-32	-3.34303	7.27696e-32	3.43377e-31	-3.59867	3.80064e-36	2.38428e-35	-4.0213	4.95536e-106	4.47284e-105
ENSG00000183784	C9orf66	-2.85021	1.71179e-50	1.52459e-49	-2.82082	5.97338e-52	6.44942e-51	-2.69532	8.68038e-46	6.43719e-45	-2.68319	4.63823e-35	3.35314e-34	-2.66454	4.34864e-37	2.99035e-36	-2.75407	2.14239e-37	1.48044e-36	-2.80458	9.92638e-121	1.2855e-119
ENSG00000184060	ADAP2	-5.62957	1.32757e-73	6.3624e-72	-4.98641	1.2416e-61	2.52806e-60	-4.93712	4.30644e-63	1.13842e-61	-4.67702	4.11117e-45	7.63194e-44	-4.70164	7.73294e-50	1.67885e-48	-4.74818	1.65724e-49	3.45933e-48	-4.91905	7.75273e-133	1.37577e-131
ENSG00000184182	UBE2F	-2.43291	4.15323e-52	4.08938e-51	-2.20473	4.0453e-55	5.34192e-54	-2.34464	5.34071e-55	7.49508e-54	-2.30004	7.92706e-43	1.18444e-41	-2.2649	8.55998e-46	1.24597e-44	-2.25685	2.42371e-43	2.7342e-42	-2.54529	6.05082e-90	3.84903e-89
ENSG00000184523	PTGER4P2	-3.5098	5.27451e-32	1.70728e-31	-3.20791	2.27223e-30	7.21075e-30	-3.43891	3.14791e-29	9.48344e-29	-3.571	2.80482e-24	9.44775e-24	-3.50979	9.11866e-25	2.76543e-24	-3.32052	3.65097e-23	1.00768e-22	-3.54336	6.25049e-69	2.49842e-68
ENSG00000184574	LPAR5	-5.24673	3.6501e-45	2.35377e-44	-4.56361	6.58922e-36	2.77638e-35	-4.90794	8.12643e-41	4.48146e-40	-4.61781	4.71962e-30	2.34071e-29	-4.65121	2.72375e-32	1.32474e-31	-4.39569	6.39829e-30	2.60555e-29	-5.01021	8.41804e-97	6.18728e-96
ENSG00000184584	TMEM173	-4.5836	2.39751e-57	3.28928e-56	-3.7609	4.12405e-48	3.5047e-47	-4.26997	1.44355e-50	1.47602e-49	-4.03196	1.77396e-37	1.589e-36	-4.15034	2.87066e-42	3.05496e-41	-3.76468	1.03438e-37	7.30183e-37	-3.76175	2.24609e-99	1.75041e-98
ENSG00000184716	SERINC4	-2.57272	5.96699e-75	3.14887e-73	-2.57272	8.10728e-78	4.60611e-76	-2.57272	4.4105e-72	2.60017e-70	-2.57272	9.73099e-57	5.9099e-55	-2.57272	1.2707e-59	7.52274e-58	-2.57272	1.06247e-57	5.71382e-56	-2.57272	1.95157e-182	1.21671e-180
ENSG00000184988	TMEM106A	-3.89607	1.72152e-69	5.77529e-68	-3.55272	2.71509e-56	3.89173e-55	-3.50251	2.56338e-56	3.94733e-55	-3.35029	5.21659e-39	5.38869e-38	-3.3293	1.50842e-43	1.78601e-42	-3.39659	3.18916e-44	3.93235e-43	-3.41064	6.96974e-124	9.80076e-123
ENSG00000185201	IFITM2	-4.11241	1.02698e-27	2.74681e-27	-3.15074	4.5068e-18	8.61145e-18	-5.47161	2.00884e-34	7.74405e-34	-4.84939	1.4376e-22	4.37585e-22	-5.07842	3.19679e-28	1.1844e-27	-4.26059	2.40352e-22	6.34425e-22	-2.48553	8.86111e-23	1.45144e-22
ENSG00000185291	IL3RA	-4.76301	9.81987e-47	6.93544e-46	-4.76301	1.47439e-48	1.29192e-47	-4.76301	6.56523e-45	4.57262e-44	-4.76301	3.89103e-35	2.83332e-34	-4.76301	5.6408e-37	3.84142e-36	-4.76301	9.47864e-36	5.76161e-35	-4.76301	5.73288e-115	6.41591e-114
ENSG00000185404	SP140L	-2.59912	6.25186e-55	7.40864e-54	-2.3734	1.03658e-48	9.15127e-48	-2.25023	2.31254e-45	1.66243e-44	-2.18168	2.67167e-33	1.67306e-32	-2.14559	6.09684e-35	3.58383e-34	-2.32222	3.78776e-38	2.7624e-37	-2.33485	1.68006e-109	1.64847e-108
ENSG00000185475	TMEM179B	-3.80554	3.14939e-65	7.35901e-64	-3.60867	2.03655e-60	3.8311e-59	-3.72938	2.0483e-61	4.70041e-60	-3.45178	5.62525e-46	1.15539e-44	-3.60795	2.88656e-51	7.24984e-50	-3.33157	2.02685e-51	5.18299e-50	-4.04391	5.52094e-127	8.46464e-126
ENSG00000185614	FAM212A	-3.59606	5.59424e-33	1.90072e-32	-3.46977	2.61804e-38	1.23869e-37	-3.51222	4.05786e-35	1.62707e-34	-3.39206	4.0553e-28	1.74898e-27	-3.51042	4.80227e-30	2.00724e-29	-3.23121	1.24639e-26	4.16351e-26	-2.9448	3.9842e-59	1.2914e-58
ENSG00000185641	CTD-2287O16.1	-4.20972	9.60867e-59	1.45264e-57	-3.968	7.68083e-56	1.06414e-54	-5.4775	2.13658e-66	8.13633e-65	-5.47984	1.25242e-52	5.28343e-51	-5.37971	1.39755e-54	5.15483e-53	-5.44517	3.36229e-56	1.4851e-54	-4.58119	9.22095e-126	1.36617e-124
ENSG00000185811	IKZF1	-3.43568	2.38534e-67	6.73535e-66	-3.10714	7.26512e-53	8.22874e-52	-2.84739	5.22811e-51	5.48096e-50	-2.70877	1.81164e-35	1.35632e-34	-2.61082	4.40269e-36	2.79432e-35	-2.63729	2.25892e-37	1.55639e-36	-3.38147	7.42045e-151	2.09948e-149
ENSG00000185862	EVI2B	-4.9423	1.02885e-50	9.2748e-50	-3.98125	1.00337e-36	4.40834e-36	-4.14174	4.37817e-44	2.88939e-43	-4.08406	3.83147e-33	2.36675e-32	-3.74839	1.75789e-34	1.00116e-33	-4.1009	5.2207e-34	2.80121e-33	-4.87629	6.71362e-115	7.50753e-114
ENSG00000185883	ATP6V0C	-4.26593	1.1051e-74	5.70362e-73	-4.50519	9.415e-88	1.01265e-85	-4.64946	5.51517e-80	6.26683e-78	-4.59937	6.12596e-61	5.64149e-59	-4.62029	2.92209e-66	3.24191e-64	-4.64134	2.51132e-61	1.9658e-59	-4.14667	1.47948e-120	1.91246e-119
ENSG00000185947	ZNF267	-3.02253	7.21625e-44	4.33591e-43	-3.13979	2.45692e-47	1.98954e-46	-2.22702	1.17204e-32	4.11718e-32	-2.41896	1.2918e-27	5.41708e-27	-2.32927	1.64271e-28	6.222e-28	-2.62037	1.29276e-30	5.48973e-30	-3.53877	9.86777e-112	1.01784e-110
ENSG00000186010	NDUFA13	-2.47528	9.72629e-31	2.97985e-30	-3.50083	4.46678e-53	5.18853e-52	-3.64264	4.03427e-62	9.8857e-61	-3.41829	2.52411e-39	2.67605e-38	-3.5857	1.22657e-49	2.61458e-48	-3.52012	6.20254e-43	6.74855e-42	-3.71002	6.54485e-139	1.35215e-137
ENSG00000186019	AC084219.4	-2.63056	1.51846e-51	1.43591e-50	-2.66887	2.15859e-54	2.71316e-53	-2.5247	2.24922e-47	1.85656e-46	-2.56442	8.82406e-38	8.11031e-37	-2.53087	1.15817e-39	9.80098e-39	-2.56939	7.32581e-39	5.66835e-38	-2.76713	2.95432e-131	5.00317e-130
ENSG00000186047	DLEU7	-2.84209	2.63432e-48	2.05069e-47	-2.65729	5.35764e-42	3.13623e-41	-2.38653	3.24086e-40	1.72772e-39	-2.55296	4.15918e-32	2.37258e-31	-2.41611	3.18007e-34	1.77384e-33	-2.593	4.58237e-36	2.8531e-35	-3.06105	1.06227e-85	6.12411e-85
ENSG00000186074	CD300LF	-2.32294	1.2421e-30	3.78649e-30	-3.4412	2.12564e-46	1.62685e-45	-3.02182	1.45447e-37	6.63651e-37	-2.92429	3.75191e-28	1.6251e-27	-3.04976	5.19013e-33	2.65537e-32	-3.14975	1.3786e-32	6.68198e-32	-3.13956	4.78938e-96	3.45355e-95
ENSG00000186431	FCAR	-4.58688	8.45122e-48	6.40547e-47	-4.43204	1.63989e-45	1.18432e-44	-4.28313	9.5322e-42	5.50446e-41	-4.22884	1.59951e-32	9.41791e-32	-4.20281	8.86477e-33	4.45611e-32	-4.33997	1.54754e-34	8.6151e-34	-4.50151	1.72244e-112	1.82338e-111
ENSG00000186517	ARHGAP30	-4.11395	3.31052e-61	5.83065e-60	-3.43732	1.16182e-42	7.03785e-42	-3.60841	1.2712e-55	1.86381e-54	-3.37492	1.82661e-37	1.63409e-36	-3.43655	2.85952e-42	3.0477e-41	-3.39205	1.28991e-41	1.25865e-40	-3.85048	3.9709e-115	4.45817e-114
ENSG00000186635	ARAP1	-2.47656	2.52794e-47	1.85611e-46	-2.61202	1.50103e-41	8.50744e-41	-2.91479	1.91809e-42	1.15545e-41	-2.52818	2.82447e-28	1.23631e-27	-2.74141	4.84826e-35	2.87388e-34	-2.43989	2.26694e-30	9.46685e-30	-2.95536	1.94312e-84	1.08731e-83
ENSG00000186818	LILRB4	-5.8374	1.20087e-83	1.2627e-81	-5.34452	8.00968e-64	1.86232e-62	-5.47523	4.69226e-75	3.47968e-73	-5.27616	7.58415e-57	4.68687e-55	-5.30662	3.17559e-62	2.36741e-60	-5.21524	9.60914e-58	5.22752e-56	-5.59152	3.56476e-166	1.4601e-164
ENSG00000186919	ZACN	-2.76451	4.81709e-60	7.89219e-59	-2.96707	1.08592e-74	5.05605e-73	-2.78261	1.94718e-61	4.48296e-60	-2.74506	1.60653e-46	3.5149e-45	-2.78702	6.40574e-53	1.95785e-51	-2.75146	2.57068e-48	4.72858e-47	-2.95072	1.35748e-167	5.7611e-166
ENSG00000187066	TMEM262	-2.18576	6.92596e-53	7.21795e-52	-2.23105	6.76694e-53	7.68654e-52	-2.2271	2.99994e-50	3.01895e-49	-2.15917	2.6843e-38	2.57642e-37	-2.22395	1.06065e-41	1.07514e-40	-2.25369	1.10633e-40	9.96054e-40	-2.37542	3.5039e-135	6.59145e-134
ENSG00000187534	PRR13P5	-2.8608	5.10436e-52	4.991e-51	-2.61239	9.38675e-50	8.88242e-49	-3.04858	1.6811e-50	1.71394e-49	-3.0246	7.14981e-41	8.76007e-40	-3.00857	1.49129e-41	1.49341e-40	-2.98958	1.35039e-41	1.31311e-40	-2.13992	3.29471e-68	1.29563e-67
ENSG00000187554	TLR5	-4.66561	1.07349e-64	2.42008e-63	-4.1918	3.97706e-51	4.06358e-50	-4.08551	5.34494e-53	6.52602e-52	-3.93688	1.73764e-36	1.42097e-35	-3.76207	1.48216e-36	9.77239e-36	-3.98512	4.09049e-41	3.82702e-40	-4.51219	1.02812e-140	2.21501e-139
ENSG00000187653	TMSB4XP8	-5.97064	3.00195e-69	9.90572e-68	-5.13876	2.91187e-56	4.16954e-55	-4.32133	4.59642e-52	5.23977e-51	-4.81935	3.07876e-40	3.56155e-39	-4.36635	2.39368e-46	3.69812e-45	-5.05499	4.93017e-23	1.35228e-22	-5.27014	2.60295e-102	2.17659e-101
ENSG00000187688	TRPV2	-3.88439	1.34377e-52	1.36607e-51	-3.07697	2.73688e-45	1.95948e-44	-3.03384	2.70285e-39	1.36401e-38	-2.84452	3.37385e-32	1.93399e-31	-2.91479	4.12612e-34	2.28257e-33	-2.60468	3.83641e-28	1.40549e-27	-2.95007	9.91407e-64	3.54002e-63
ENSG00000187796	CARD9	-2.90456	1.61025e-36	6.47872e-36	-3.13015	2.96367e-42	1.76195e-41	-3.2111	4.48223e-41	2.50614e-40	-2.99561	2.06063e-28	9.09309e-28	-3.18904	8.28734e-34	4.48765e-33	-2.99901	3.14006e-29	1.22355e-28	-2.82038	7.47593e-81	3.8812e-80
ENSG00000187840	EIF4EBP1	-2.99009	4.29271e-46	2.92336e-45	-2.73502	6.00453e-35	2.40557e-34	-3.11473	1.9356e-42	1.16549e-41	-2.91433	3.15281e-31	1.68716e-30	-2.90923	3.54802e-32	1.71028e-31	-2.69214	3.83258e-32	1.7893e-31	-2.33881	1.75437e-63	6.23433e-63
ENSG00000187912	CLEC17A	-2.58831	1.91488e-31	6.04812e-31	-2.36892	6.40172e-28	1.80364e-27	-2.31417	2.59903e-25	6.53234e-25	-2.25282	3.39712e-19	8.56117e-19	-2.29236	4.68679e-21	1.17045e-20	-2.20155	5.83931e-19	1.30348e-18	-2.55184	2.28175e-74	1.03944e-73
ENSG00000188223	AC002398.9	-4.31872	9.68703e-84	1.03402e-81	-4.31872	6.26073e-87	6.48631e-85	-4.31872	1.50532e-80	1.73852e-78	-4.31872	1.74956e-63	2.00417e-61	-4.31872	1.08622e-66	1.22439e-64	-4.31872	1.49091e-64	1.61045e-62	-4.31872	2.24637e-203	2.59437e-201
ENSG00000188313	PLSCR1	-4.09431	3.37317e-50	2.94838e-49	-3.38085	5.20432e-32	1.79376e-31	-2.83532	1.8086e-33	6.61387e-33	-2.87982	4.02133e-25	1.43299e-24	-2.71611	3.25581e-25	1.01966e-24	-2.997	8.99394e-28	3.22783e-27	-3.96719	4.14231e-72	1.7778e-71
ENSG00000188375	H3F3C	-3.63299	2.96117e-62	5.63247e-61	-3.66404	4.187e-62	8.72704e-61	-4.07621	1.92035e-64	5.94676e-63	-4.07858	1.46205e-51	5.43544e-50	-4.11287	3.41205e-55	1.32076e-53	-4.10851	1.23631e-53	4.07e-52	-4.06971	1.79216e-163	6.76985e-162
ENSG00000188404	SELL	-4.81618	1.79183e-40	8.88975e-40	-4.38883	1.17425e-31	3.96577e-31	-4.41967	1.79654e-35	7.3202e-35	-4.24533	4.37925e-27	1.76548e-26	-4.08088	1.02615e-25	3.29952e-25	-4.25199	1.60297e-28	6.01005e-28	-5.22727	8.13719e-107	7.52811e-106
ENSG00000188460	ACTBP11	-2.79761	5.94172e-60	9.68969e-59	-2.77772	8.4384e-62	1.73067e-60	-2.68888	1.40423e-44	9.57677e-44	-2.72891	7.40534e-42	9.94673e-41	-2.80448	1.16367e-47	2.03678e-46	-2.79205	9.15574e-46	1.32312e-44	-2.79767	3.77077e-146	9.38695e-145
ENSG00000188603	CLN3	-2.98936	5.36548e-65	1.23126e-63	-3.06986	9.26225e-69	2.88728e-67	-2.91006	1.27296e-58	2.39146e-57	-2.8489	8.74248e-44	1.42922e-42	-2.87648	6.27779e-50	1.37138e-48	-2.97872	2.02434e-50	4.57833e-49	-3.0479	1.68375e-148	4.5275e-147
ENSG00000188739	RBM34	-3.05483	2.07905e-70	7.64759e-69	-3.00581	4.01074e-72	1.59187e-70	-2.84364	1.04896e-63	2.94419e-62	-2.86636	1.88815e-49	5.58907e-48	-2.81209	1.10343e-52	3.22557e-51	-2.93866	1.31383e-53	4.30507e-52	-2.59761	7.90024e-89	4.85665e-88
ENSG00000188765	TMSB4XP2	-3.24672	1.01775e-41	5.38897e-41	-2.16267	9.03124e-30	2.78508e-29	-4.04001	1.41917e-52	1.67752e-51	-3.97796	1.50962e-40	1.80259e-39	-3.95858	6.13594e-45	8.36126e-44	-4.08839	2.71491e-47	4.46881e-46	-4.03491	2.59407e-133	4.64428e-132
ENSG00000189050	RNFT1	-2.94939	8.14887e-47	5.78426e-46	-3.55357	2.40663e-60	4.50325e-59	-3.10007	1.34782e-49	1.28838e-48	-3.32327	2.36212e-43	3.6776e-42	-3.11621	4.78116e-40	4.17221e-39	-3.63493	9.36281e-46	1.35028e-44	-3.87389	2.77867e-136	5.34125e-135
ENSG00000189067	LITAF	-3.62145	1.40685e-36	5.67816e-36	-2.35076	6.73649e-18	1.27972e-17	-3.36295	4.56535e-33	1.63471e-32	-2.8673	4.48369e-22	1.32777e-21	-2.98806	9.52227e-24	2.74205e-23	-2.74383	1.01685e-21	2.59227e-21	-3.28867	5.58945e-66	2.09289e-65
ENSG00000196126	HLA-DRB1	-7.8114	7.08804e-54	7.75995e-53	-6.5673	3.35775e-42	1.98617e-41	-6.56502	3.0795e-49	2.87733e-48	-6.32513	3.15385e-38	3.01069e-37	-6.1908	8.54079e-42	8.73292e-41	-6.12629	5.77263e-42	5.78906e-41	-6.9365	2.33442e-85	1.33436e-84
ENSG00000196205	EEF1A1P5	-2.66091	6.66712e-37	2.73797e-36	-2.50789	7.27412e-38	3.38482e-37	-3.9069	7.52071e-51	7.81466e-50	-4.1626	1.75098e-45	3.38891e-44	-3.896	2.98773e-44	3.79253e-43	-3.87764	1.79179e-36	1.14444e-35	-3.5064	6.44961e-93	4.37109e-92
ENSG00000196209	SIRPB2	-4.06361	3.76084e-55	4.52522e-54	-3.6258	3.36388e-42	1.98897e-41	-3.6703	4.15422e-47	3.37366e-46	-3.56615	3.3313e-34	2.23514e-33	-3.52895	7.7484e-37	5.22368e-36	-3.65954	3.59778e-37	2.43598e-36	-3.93925	2.37628e-119	2.96562e-118
ENSG00000196301	HLA-DRB9	-4.15564	4.66286e-55	5.56305e-54	-4.10585	2.37661e-56	3.42747e-55	-4.01179	3.68979e-47	3.00863e-46	-4.01594	3.26828e-38	3.1136e-37	-4.09379	2.15219e-42	2.31484e-41	-4.07429	9.09208e-41	8.25966e-40	-4.10275	2.2141e-126	3.33654e-125
ENSG00000196329	GIMAP5	-3.96172	4.10848e-57	5.56085e-56	-3.83351	8.67936e-57	1.29e-55	-3.76006	6.90569e-52	7.74433e-51	-3.72012	3.47024e-39	3.64078e-38	-3.69578	2.29703e-42	2.46311e-41	-3.80064	1.1404e-41	1.11974e-40	-3.86812	8.34091e-132	1.44201e-130
ENSG00000196664	TLR7	-5.90328	1.11264e-69	3.82367e-68	-5.44019	3.69179e-57	5.63567e-56	-4.97605	7.668e-56	1.14089e-54	-4.81544	5.82859e-40	6.59108e-39	-4.59328	3.55209e-40	3.13001e-39	-4.8271	1.00162e-43	1.16828e-42	-5.85811	1.34171e-167	5.71313e-166
ENSG00000196735	HLA-DQA1	-4.20422	3.61003e-41	1.85234e-40	-3.78907	1.30897e-33	4.86503e-33	-3.58983	1.03343e-31	3.47269e-31	-3.56646	7.38935e-25	2.58288e-24	-3.40648	2.88042e-25	9.04542e-25	-3.52218	1.20432e-25	3.80043e-25	-4.07986	6.01175e-91	3.9125e-90
ENSG00000196843	ARID5A	-4.20346	7.13587e-52	6.90553e-51	-3.39752	2.62613e-42	1.56656e-41	-3.99342	6.34196e-52	7.14865e-51	-3.64719	4.55301e-36	3.58591e-35	-3.88475	3.86938e-40	3.4011e-39	-3.40698	1.43498e-36	9.2366e-36	-2.93443	2.69363e-58	8.57701e-58
ENSG00000196866	HIST1H2AD	-4.0098	1.19344e-37	5.08791e-37	-4.01135	3.84219e-39	1.90287e-38	-4.00962	3.8063e-36	1.60475e-35	-4.01608	2.88023e-28	1.25954e-27	-3.96642	3.1096e-29	1.23109e-28	-3.99233	1.5301e-28	5.74451e-28	-4.01608	3.32783e-93	2.27066e-92
ENSG00000197019	SERTAD1	-2.58856	5.42647e-29	1.53934e-28	-2.4776	2.41478e-31	8.03595e-31	-2.73392	1.93821e-29	5.89708e-29	-2.44593	1.45665e-19	3.74529e-19	-2.73324	8.57259e-24	2.47567e-23	-2.39933	3.17512e-19	7.17522e-19	-2.24587	3.15213e-35	6.43955e-35
ENSG00000197093	GAL3ST4	-5.84072	5.51217e-68	1.64897e-66	-5.24719	6.37047e-59	1.08275e-57	-5.98728	6.10929e-63	1.59703e-61	-5.68465	2.06076e-46	4.44658e-45	-5.72842	6.16954e-52	1.64327e-50	-5.50137	4.62992e-49	9.18811e-48	-5.36334	5.07282e-131	8.56001e-130
ENSG00000197153	HIST1H3J	-3.01605	9.87785e-34	3.4847e-33	-3.01825	4.22133e-35	1.70572e-34	-2.61004	1.59926e-24	3.88979e-24	-2.70494	1.03911e-19	2.69932e-19	-2.69085	3.02047e-22	8.0299e-22	-2.65116	7.391e-20	1.72245e-19	-2.97871	8.71108e-82	4.60905e-81
ENSG00000197249	SERPINA1	-5.70917	8.22829e-57	1.09685e-55	-4.93198	2.0031e-34	7.7794e-34	-5.3029	8.50009e-50	8.23136e-49	-5.07431	5.2891e-35	3.80999e-34	-5.10216	1.34504e-38	1.04244e-37	-4.86269	9.77823e-35	5.51101e-34	-5.56206	1.12544e-96	8.23339e-96
ENSG00000197329	PELI1	-2.94823	6.07796e-40	2.9429e-39	-3.44035	6.17589e-49	5.51097e-48	-3.40168	4.69748e-51	4.95415e-50	-3.38833	1.03911e-38	1.03691e-37	-3.06466	6.18985e-38	4.54956e-37	-3.31024	5.31718e-41	4.91595e-40	-4.47938	4.73627e-127	7.27743e-126
ENSG00000197405	C5AR1	-5.88409	3.0284e-66	7.84377e-65	-5.2206	5.87322e-45	4.113e-44	-5.50066	3.8922e-57	6.3992e-56	-5.3247	1.72335e-42	2.47523e-41	-5.3395	6.84143e-43	7.68093e-42	-5.25488	2.48075e-43	2.79183e-42	-5.2558	1.80543e-114	2.00303e-113
ENSG00000197409	HIST1H3D	-3.31098	3.44802e-31	1.0765e-30	-3.31098	2.00507e-32	7.06463e-32	-3.31098	5.94759e-30	1.84463e-29	-3.31098	2.51956e-23	7.99382e-23	-3.31098	1.42484e-24	4.29065e-24	-3.31098	9.66382e-24	2.74689e-23	-3.31098	2.37499e-77	1.14602e-76
ENSG00000197471	SPN	-2.41708	7.87627e-53	8.19015e-52	-2.05103	9.07115e-38	4.19746e-37	-2.18373	4.27677e-43	2.66991e-42	-2.02456	2.32442e-28	1.02315e-27	-2.08737	7.02733e-33	3.55402e-32	-2.01418	2.17687e-32	1.03657e-31	-2.19956	8.71597e-83	4.71251e-82
ENSG00000197582	GPX1P1	-4.97864	3.53135e-25	8.46635e-25	-4.55204	4.18635e-19	8.30667e-19	-4.80741	2.01654e-21	4.37527e-21	-4.82127	5.6713e-19	1.41256e-18	-4.89111	3.12281e-19	7.16968e-19	-4.78856	1.39405e-17	2.91124e-17	-4.01595	1.20524e-16	1.78606e-16
ENSG00000197629	MPEG1	-5.03518	8.42231e-59	1.27603e-57	-4.66119	2.26074e-48	1.95663e-47	-4.33923	3.15987e-48	2.75853e-47	-4.18385	6.84835e-34	4.47973e-33	-4.15532	1.40258e-37	1.00012e-36	-4.17884	4.27021e-37	2.8692e-36	-5.07943	2.76021e-137	5.43934e-136
ENSG00000197646	PDCD1LG2	-3.88547	1.90128e-52	1.90805e-51	-3.76604	8.76914e-51	8.76914e-50	-3.17442	2.78464e-40	1.49071e-39	-3.18769	1.44402e-31	7.90454e-31	-3.00202	2.52758e-32	1.23273e-31	-3.32555	3.86669e-34	2.09787e-33	-3.95306	2.05152e-129	3.34559e-128
ENSG00000197746	PSAP	-2.70818	6.89826e-43	3.90191e-42	-2.64627	7.05827e-42	4.09145e-41	-2.68801	2.28262e-51	2.457e-50	-2.56686	1.59781e-36	1.31119e-35	-2.70981	1.18935e-40	1.09529e-39	-2.20828	2.81217e-35	1.64209e-34	-2.97159	1.53343e-55	4.61173e-55
ENSG00000197943	PLCG2	-3.48572	1.02668e-60	1.75771e-59	-3.1709	5.54293e-52	5.99846e-51	-3.0523	3.76146e-51	3.99089e-50	-2.9216	7.87848e-36	6.06269e-35	-2.92503	1.35861e-39	1.14149e-38	-2.9905	2.22689e-39	1.78481e-38	-3.34823	5.67737e-133	1.00875e-131
ENSG00000197976	AKAP17A	-3.54152	2.03386e-48	1.59649e-47	-3.54152	2.64222e-50	2.56751e-49	-3.54152	1.57161e-46	1.22207e-45	-3.54152	2.01869e-36	1.63749e-35	-3.54152	2.53086e-38	1.9172e-37	-3.54152	4.68509e-37	3.13303e-36	-3.54152	5.15682e-119	6.35692e-118
ENSG00000197992	CLEC9A	-3.68129	4.80495e-37	1.98481e-36	-3.31166	8.93877e-33	3.20232e-32	-3.34194	6.2493e-32	2.12431e-31	-3.32056	3.06344e-25	1.10224e-24	-3.24875	4.9153e-25	1.51878e-24	-3.37377	4.68149e-26	1.51186e-25	-3.6664	2.60277e-89	1.62126e-88
ENSG00000198019	FCGR1B	-5.14178	1.2824e-73	6.16692e-72	-4.77616	4.10287e-61	8.04025e-60	-4.78484	1.10812e-59	2.19907e-58	-4.6998	2.00017e-47	4.89278e-46	-4.57898	1.05632e-46	1.69709e-45	-4.86524	7.84825e-52	2.11438e-50	-4.79794	2.11718e-130	3.50954e-129
ENSG00000198223	CSF2RA	-7.21705	6.84742e-85	8.10758e-83	-7.21705	4.01564e-88	4.49051e-86	-7.21705	1.17267e-81	1.48855e-79	-7.21705	2.28898e-64	2.87961e-62	-7.21705	1.28944e-67	1.55284e-65	-7.21705	1.88837e-65	2.18091e-63	-7.21705	4.08819e-206	5.05285e-204
ENSG00000198246	SLC29A3	-4.80525	6.1219e-52	5.9488e-51	-4.03103	2.35515e-48	2.03708e-47	-4.63729	2.42251e-47	1.99493e-46	-4.51107	5.94649e-37	5.07487e-36	-4.41322	1.23023e-39	1.03672e-38	-4.46458	1.52782e-38	1.1518e-37	-4.38048	6.82903e-110	6.73817e-109
ENSG00000198286	CARD11	-4.3715	8.57646e-49	6.86994e-48	-4.11219	2.7549e-48	2.37555e-47	-4.19227	3.17053e-43	1.9961e-42	-4.04388	1.55505e-33	9.92328e-33	-4.233	5.80146e-38	4.27971e-37	-3.90083	1.83597e-33	9.50711e-33	-4.13747	4.74411e-102	3.94829e-101
ENSG00000198406	BZW1P2	-4.02763	3.16487e-59	4.91113e-58	-3.96335	5.87522e-63	1.29956e-61	-3.47475	1.01416e-52	1.21613e-51	-3.77391	8.92705e-43	1.32402e-41	-3.54589	8.66721e-45	1.15864e-43	-3.77602	9.06556e-48	1.56154e-46	-4.14511	3.1793e-138	6.40863e-137
ENSG00000198502	HLA-DRB5	-7.65016	1.94279e-46	1.34847e-45	-6.6647	2.57895e-33	9.48017e-33	-6.45616	2.51186e-38	1.1977e-37	-6.31839	8.5758e-32	4.78546e-31	-6.21318	1.82513e-33	9.6027e-33	-6.10221	1.52177e-30	6.43702e-30	-7.13024	3.65224e-58	1.16006e-57
ENSG00000198618	PPIAP22	-3.32961	7.58519e-45	4.80338e-44	-3.02501	1.26392e-40	6.80756e-40	-3.28073	1.28552e-32	4.50573e-32	-3.75069	6.40231e-34	4.1977e-33	-3.74532	8.02902e-32	3.77222e-31	-4.61027	1.43969e-39	1.17732e-38	-2.78082	1.26364e-45	3.12417e-45
ENSG00000198771	RCSD1	-4.23168	6.32045e-62	1.17642e-60	-3.47124	2.42504e-46	1.84796e-45	-3.36814	3.58524e-52	4.107e-51	-3.22258	3.96659e-38	3.76612e-37	-3.24077	7.24385e-42	7.46641e-41	-3.24346	4.12014e-42	4.17046e-41	-3.83484	2.77898e-120	3.56611e-119
ENSG00000198829	SUCNR1	-3.11723	1.15064e-36	4.6668e-36	-3.04443	1.00594e-36	4.41824e-36	-2.95122	4.01647e-33	1.44331e-32	-2.91293	1.92241e-25	7.01004e-25	-2.93329	6.10703e-27	2.09669e-26	-2.98275	1.2131e-26	4.05324e-26	-3.12226	9.41247e-91	6.09755e-90
ENSG00000198865	CCDC152	-4.78757	2.88555e-68	8.81941e-67	-4.30807	6.4564e-62	1.33584e-60	-4.09101	6.51638e-58	1.14341e-56	-4.01906	3.66481e-45	6.84843e-44	-3.88346	2.46637e-44	3.1449e-43	-4.0983	2.0507e-47	3.41137e-46	-4.66312	4.40773e-151	1.25212e-149
ENSG00000198951	NAGA	-4.59538	1.37805e-61	2.49573e-60	-4.53679	1.78519e-58	2.94536e-57	-4.54228	6.14799e-65	1.99597e-63	-4.2847	2.87611e-47	6.8338e-46	-4.37849	3.75813e-52	1.02224e-50	-4.22141	6.27465e-49	1.23477e-47	-4.68487	4.98847e-128	7.84459e-127
ENSG00000199032	MIR425	-3.32203	8.53787e-40	4.08623e-39	-3.48562	1.39109e-46	1.07577e-45	-2.77045	9.50736e-24	2.25179e-23	-2.80075	3.11937e-19	7.87527e-19	-2.83817	6.42892e-22	1.67468e-21	-3.03714	2.29268e-24	6.75671e-24	-3.43774	1.39217e-89	8.75699e-89
ENSG00000199377	RNU5F-1	-4.12629	9.52142e-37	3.88185e-36	-3.85889	1.17293e-36	5.13887e-36	-3.3948	1.21714e-25	3.11186e-25	-3.22891	8.77916e-20	2.28605e-19	-3.33045	5.87322e-21	1.4613e-20	-3.6812	1.56317e-24	4.64078e-24	-3.20289	2.37179e-48	6.17374e-48
ENSG00000199477	SNORA31	-3.22064	8.21169e-29	2.30667e-28	-3.37116	1.02097e-32	3.64742e-32	-3.33574	3.74129e-27	1.02299e-26	-3.2262	1.39494e-20	3.78631e-20	-3.12414	4.09203e-20	9.79723e-20	-3.63401	7.96262e-26	2.53831e-25	-3.49792	6.06865e-69	2.42643e-68
ENSG00000199990	VTRNA1-1	-4.61692	6.8556e-42	3.65476e-41	-4.94293	6.56643e-50	6.27261e-49	-4.56768	1.71477e-35	7.0012e-35	-4.20109	2.42822e-24	8.21653e-24	-4.84746	3.92171e-35	2.33743e-34	-4.76912	1.23224e-33	6.4472e-33	-4.94578	9.89597e-103	8.3694e-102
ENSG00000200320	SNORA63	-3.14497	9.30164e-57	1.23293e-55	-3.14497	5.92045e-59	1.0087e-57	-3.14497	1.46731e-54	1.99175e-53	-3.14497	8.51876e-43	1.26747e-41	-3.14497	5.2225e-45	7.14417e-44	-3.14497	1.55753e-43	1.78564e-42	-3.14497	5.27647e-139	1.09493e-137
ENSG00000200388	RNU6-618P	-3.36134	1.37607e-39	6.51505e-39	-3.86211	5.07289e-61	9.89986e-60	-2.77966	2.28505e-30	7.206e-30	-3.09712	8.01514e-28	3.40161e-27	-3.00559	6.69577e-25	2.04738e-24	-3.59628	4.1818e-32	1.94782e-31	-3.3789	1.56632e-64	5.68947e-64
ENSG00000200397	Y_RNA	-4.06511	4.72786e-36	1.87175e-35	-4.09322	6.67031e-38	3.10693e-37	-2.80011	3.13544e-18	5.99679e-18	-2.90691	2.14544e-14	4.25525e-14	-2.686	1.05449e-15	2.05871e-15	-3.2776	2.3665e-18	5.133e-18	-3.59336	7.79378e-54	2.26562e-53
ENSG00000200463	SNORD118	-5.22685	1.33145e-54	1.52645e-53	-5.22685	1.01862e-56	1.50443e-55	-5.22685	1.74733e-52	2.04825e-51	-5.22685	3.79822e-41	4.80404e-40	-5.22685	2.8e-43	3.25243e-42	-5.22685	7.38477e-42	7.36386e-41	-5.22685	7.63487e-134	1.3845e-132
ENSG00000200530	SNORD35B	-2.82122	5.74774e-51	5.22825e-50	-2.82122	6.00075e-53	6.86288e-52	-2.82122	5.527e-49	5.06013e-48	-2.82122	2.28279e-38	2.20456e-37	-2.82122	2.29842e-40	2.05878e-39	-2.82122	4.92449e-39	3.86041e-38	-2.82122	3.93447e-125	5.71512e-124
ENSG00000201558	RNVU1-6	-3.23318	3.18091e-30	9.51975e-30	-3.65383	6.2826e-39	3.07261e-38	-3.05014	1.24125e-20	2.60411e-20	-3.38946	5.8562e-24	1.93467e-23	-3.17998	7.38872e-20	1.74471e-19	-3.36631	1.73496e-23	4.86097e-23	-3.5514	6.25027e-81	3.25689e-80
ENSG00000202252	SNORD14C	-3.96559	2.54579e-67	7.17404e-66	-3.96559	6.60119e-70	2.26304e-68	-3.96559	9.85931e-65	3.16441e-63	-3.96559	6.91322e-51	2.40512e-49	-3.96559	1.72398e-53	5.7155e-52	-3.96559	9.36491e-52	2.48496e-50	-3.96559	3.06015e-164	1.20105e-162
ENSG00000202335	SNORD50	-3.52385	1.39966e-51	1.32803e-50	-3.52385	1.38649e-53	1.6556e-52	-3.52385	1.41853e-49	1.3523e-48	-3.52385	7.75715e-39	7.84062e-38	-3.52385	7.40939e-41	6.93677e-40	-3.52385	1.64425e-39	1.33761e-38	-3.52385	1.32934e-126	2.01403e-125
ENSG00000202444	RNU5E-6P	-3.94748	3.42781e-47	2.49859e-46	-3.94748	4.94819e-49	4.44359e-48	-3.94748	2.38365e-45	1.71093e-44	-3.94748	1.74306e-35	1.31055e-34	-3.94748	2.42914e-37	1.70197e-36	-3.94748	4.19064e-36	2.61729e-35	-3.94748	4.56699e-116	5.25726e-115
ENSG00000202474	RNA5SP283	-3.83351	3.59659e-43	2.07349e-42	-3.79556	1.6078e-43	1.02832e-42	-3.93245	5.67722e-30	1.76194e-29	-3.89099	2.0084e-23	6.40379e-23	-4.34297	1.6432e-33	8.70731e-33	-4.19009	6.58263e-31	2.85295e-30	-2.11184	4.14994e-30	7.72426e-30
ENSG00000202515	VTRNA1-3	-3.25786	1.11807e-25	2.7369e-25	-3.83847	2.35198e-37	1.0608e-36	-3.09717	7.03979e-19	1.38322e-18	-3.03027	1.61182e-15	3.36901e-15	-3.19749	6.28825e-17	1.29496e-16	-3.3009	3.41189e-18	7.35406e-18	-3.64538	8.4549e-70	3.45003e-69
ENSG00000203546	RP11-176H8.1	-3.19707	4.75287e-65	1.09964e-63	-3.15345	1.1011e-66	3.07827e-65	-3.09056	1.58819e-60	3.40604e-59	-3.07266	3.68435e-47	8.60546e-46	-3.03957	4.6687e-49	9.31757e-48	-3.07953	2.69291e-48	4.92768e-47	-3.0719	1.38585e-138	2.81769e-137
ENSG00000203667	COX20	-2.02531	2.66244e-43	1.54377e-42	-2.46903	7.32968e-58	1.17626e-56	-2.16408	4.51265e-46	3.41295e-45	-2.21072	3.72719e-36	2.952e-35	-2.04869	5.39864e-36	3.40954e-35	-2.29788	1.81942e-39	1.47501e-38	-2.58559	2.17515e-99	1.697e-98
ENSG00000203747	FCGR3A	-6.7014	2.21469e-47	1.63463e-46	-5.19568	3.5526e-27	9.65776e-27	-5.46155	1.5098e-38	7.30532e-38	-5.23264	4.88546e-30	2.4187e-29	-5.06245	3.50221e-32	1.68936e-31	-5.26027	8.70111e-32	3.97016e-31	-6.22623	4.06428e-76	1.91974e-75
ENSG00000203812	HIST2H2AA4	-4.39338	1.04913e-51	1.00287e-50	-4.40894	6.08357e-54	7.39581e-53	-4.40944	8.07991e-50	7.85144e-49	-4.41267	4.07054e-39	4.24844e-38	-4.41643	3.44698e-41	3.31975e-40	-4.41926	7.02997e-40	5.89597e-39	-4.41305	2.31958e-127	3.58759e-126
ENSG00000203818	HIST2H3PS2	-2.75616	1.01581e-29	2.97254e-29	-2.75731	6.49971e-31	2.11454e-30	-2.75731	1.48936e-28	4.36279e-28	-2.75731	3.16138e-22	9.44926e-22	-2.75731	2.03593e-23	5.74298e-23	-2.75731	1.26627e-22	3.39585e-22	-2.75667	9.15781e-74	4.08851e-73
ENSG00000204136	GGTA1P	-3.6279	1.95567e-44	1.21122e-43	-2.34783	6.97034e-27	1.86964e-26	-2.78151	4.27262e-34	1.61831e-33	-2.78652	8.89423e-26	3.31096e-25	-2.5992	2.3121e-25	7.29457e-25	-2.73559	1.50949e-27	5.34929e-27	-2.81017	4.66962e-73	2.04269e-72
ENSG00000204161	C10orf128	-3.85119	1.87602e-48	1.47589e-47	-2.76979	8.68656e-26	2.23509e-25	-3.143	5.23858e-38	2.44247e-37	-2.85555	1.16513e-24	4.01976e-24	-2.92281	3.01777e-28	1.11955e-27	-2.94447	1.5359e-27	5.43741e-27	-3.55251	4.92413e-96	3.5489e-95
ENSG00000204196	AC011737.2	-3.00702	1.72741e-66	4.54937e-65	-3.00702	4.80648e-69	1.54973e-67	-3.00702	6.2342e-64	1.81487e-62	-3.00702	2.99997e-50	9.62861e-49	-3.00702	8.02862e-53	2.41717e-51	-3.00702	4.16069e-51	1.0249e-49	-3.00702	2.95268e-162	1.07502e-160
ENSG00000204252	HLA-DOA	-4.10767	1.52476e-47	1.13491e-46	-3.84954	2.48761e-39	1.24824e-38	-3.71828	3.00539e-44	2.01168e-43	-3.54403	1.38743e-32	8.23455e-32	-3.35335	4.06582e-33	2.09231e-32	-3.33788	1.20911e-31	5.47266e-31	-4.33086	7.99838e-122	1.06218e-120
ENSG00000204253	HNRNPCP2	-2.90998	1.57006e-57	2.18168e-56	-2.89881	1.60667e-59	2.84039e-58	-3.57814	2.46336e-64	7.54536e-63	-3.60978	3.37408e-55	1.79399e-53	-3.62606	5.18466e-60	3.19004e-58	-3.59813	3.72632e-59	2.40843e-57	-3.3887	1.16175e-140	2.49149e-139
ENSG00000204257	HLA-DMA	-6.35915	9.08135e-65	2.05717e-63	-5.76693	4.88212e-55	6.42288e-54	-6.32331	3.5092e-67	1.44575e-65	-6.14075	1.11684e-51	4.25303e-50	-6.01066	1.80216e-53	5.94669e-52	-6.00594	2.07171e-51	5.28812e-50	-5.8846	2.70117e-115	3.04964e-114
ENSG00000204261	PSMB8-AS1	-4.03636	7.57793e-52	7.32325e-51	-3.86807	3.98663e-50	3.83948e-49	-3.85799	6.00308e-46	4.49414e-45	-3.77509	3.28358e-35	2.40216e-34	-3.81779	1.66034e-37	1.17795e-36	-3.9134	2.33884e-38	1.73717e-37	-4.0054	1.43618e-115	1.6372e-114
ENSG00000204264	PSMB8	-3.26817	1.42643e-47	1.0651e-46	-2.78089	2.36239e-36	1.02073e-35	-3.06034	5.13555e-42	3.00498e-41	-2.77357	2.1681e-27	8.91146e-27	-2.95987	4.73328e-33	2.42869e-32	-2.76712	3.23071e-32	1.51786e-31	-2.56049	6.09598e-60	2.00871e-59
ENSG00000204287	HLA-DRA	-7.70482	1.22789e-46	8.62033e-46	-6.42477	3.43812e-36	1.47109e-35	-6.3064	5.15108e-44	3.38836e-43	-6.1446	7.70246e-35	5.44608e-34	-5.72171	5.56776e-36	3.5132e-35	-5.88579	8.18113e-38	5.80716e-37	-7.52622	1.10557e-85	6.36593e-85
ENSG00000204388	HSPA1B	-3.43432	1.23428e-12	1.91047e-12	-4.00658	1.51678e-23	3.56309e-23	-4.45181	7.09971e-30	2.19712e-29	-4.1986	1.21205e-22	3.7021e-22	-4.53095	3.49017e-26	1.14979e-25	-4.04272	1.39984e-19	3.216e-19	-4.39095	5.9941e-43	1.40457e-42
ENSG00000204389	HSPA1A	-4.33204	5.34629e-15	8.87897e-15	-4.54954	2.7866e-25	7.01129e-25	-5.70889	1.78027e-34	6.87985e-34	-5.26043	6.27978e-26	2.358e-25	-5.5385	9.75e-29	3.74122e-28	-5.06879	1.12838e-22	3.03528e-22	-4.76362	1.2555e-43	2.98214e-43
ENSG00000204397	CARD16	-2.72276	4.75035e-32	1.5408e-31	-2.85692	1.85186e-35	7.61608e-35	-2.96357	7.9886e-35	3.15292e-34	-2.92336	1.17606e-25	4.34014e-25	-2.95218	2.01752e-27	7.13167e-27	-3.00899	3.18233e-29	1.23951e-28	-2.97514	2.00857e-84	1.12349e-83
ENSG00000204422	XXbac-BPG32J3.20	-5.26971	3.72731e-94	1.16706e-91	-5.26994	9.92482e-98	2.91335e-95	-5.26994	1.38542e-90	4.33791e-88	-5.2689	1.83183e-71	6.00245e-69	-5.26994	4.52023e-75	1.38457e-72	-5.26994	1.11532e-72	3.14298e-70	-5.26994	3.55975e-228	1.1146e-225
ENSG00000204427	ABHD16A	-3.80011	2.97776e-75	1.61359e-73	-4.19313	4.47329e-85	4.01456e-83	-3.74326	1.12755e-68	5.17496e-67	-3.71298	8.15613e-58	5.47238e-56	-3.80089	1.2836e-61	9.13427e-60	-3.78223	2.69956e-61	2.10148e-59	-4.35774	2.48178e-195	2.15854e-193
ENSG00000204435	CSNK2B	-2.4287	9.3795e-46	6.27527e-45	-2.68592	6.14692e-53	7.01865e-52	-3.09122	2.6068e-57	4.34672e-56	-2.9143	6.99007e-45	1.27248e-43	-3.02772	4.25853e-49	8.5718e-48	-2.80395	7.62068e-52	2.06095e-50	-3.28871	8.18458e-127	1.24671e-125
ENSG00000204472	AIF1	-6.64273	6.25115e-55	7.40864e-54	-5.18904	9.09022e-36	3.7995e-35	-5.7691	1.04475e-52	1.25068e-51	-5.56015	6.55746e-40	7.38566e-39	-5.51137	5.13313e-45	7.02875e-44	-5.57257	1.29353e-41	1.2613e-40	-5.81309	9.01774e-87	5.32746e-86
ENSG00000204482	LST1	-4.34794	4.5288e-55	5.41228e-54	-3.51587	3.82875e-39	1.89687e-38	-4.10979	1.61498e-50	1.64772e-49	-3.88841	1.29683e-37	1.17734e-36	-3.90704	1.28315e-37	9.17277e-37	-3.99675	9.50044e-40	7.87882e-39	-3.80956	7.91152e-95	5.55699e-94
ENSG00000204525	HLA-C	-4.06831	1.06804e-39	5.08057e-39	-3.45903	6.82424e-34	2.57508e-33	-4.00351	4.40991e-39	2.20261e-38	-3.59008	9.65445e-30	4.6602e-29	-3.89663	1.81432e-34	1.03121e-33	-3.23165	3.2527e-31	1.43399e-30	-3.3223	8.50804e-53	2.41739e-52
ENSG00000204592	HLA-E	-4.65804	4.61212e-47	3.32233e-46	-3.98864	2.31551e-37	1.04469e-36	-4.38448	1.03735e-51	1.13922e-50	-3.84245	3.96557e-34	2.63934e-33	-4.10702	8.48998e-40	7.25197e-39	-3.67779	1.9095e-38	1.43035e-37	-3.82128	5.03797e-77	2.412e-76
ENSG00000204622	HLA-J	-2.68933	3.20645e-45	2.07528e-44	-2.8585	2.6993e-50	2.62117e-49	-2.58401	3.67066e-41	2.06795e-40	-2.52752	5.94203e-30	2.9182e-29	-2.51215	4.45684e-33	2.28851e-32	-2.6973	1.16566e-34	6.55919e-34	-2.96858	5.23456e-120	6.65658e-119
ENSG00000204632	HLA-G	-2.70378	3.42467e-51	3.17457e-50	-2.68805	9.15792e-53	1.03146e-51	-2.50224	1.25858e-42	7.63383e-42	-2.35553	1.03416e-29	4.98507e-29	-2.50164	2.85853e-35	1.72196e-34	-2.48961	2.91814e-34	1.59738e-33	-2.69588	4.53908e-124	6.42125e-123
ENSG00000204642	HLA-F	-2.57348	6.25755e-36	2.46489e-35	-2.64661	5.4582e-38	2.55672e-37	-2.60104	1.8275e-39	9.30257e-39	-2.43389	1.20709e-27	5.07245e-27	-2.44372	4.73598e-30	1.98071e-29	-2.53486	6.83601e-32	3.13642e-31	-2.26457	5.37075e-58	1.70016e-57
ENSG00000205105	COX17P1	-2.33843	7.12419e-44	4.28424e-43	-2.4005	2.14807e-46	1.64313e-45	-2.7921	6.98831e-56	1.04306e-54	-2.76604	1.04591e-38	1.04295e-37	-2.84089	4.82861e-51	1.17302e-49	-2.82539	2.57693e-48	4.7339e-47	-2.67055	5.25374e-107	4.87971e-106
ENSG00000205155	PSENEN	-2.80894	1.07432e-53	1.16799e-52	-2.29005	1.07836e-47	8.91669e-47	-2.53905	5.28953e-53	6.46397e-52	-2.4218	1.55993e-39	1.68554e-38	-2.44318	2.39575e-41	2.35562e-40	-2.44834	9.47656e-41	8.59786e-40	-2.26983	1.73709e-72	7.49404e-72
ENSG00000205220	PSMB10	-4.57022	9.46401e-65	2.14042e-63	-4.74324	1.32782e-75	6.47368e-74	-4.56685	5.77101e-71	3.19787e-69	-4.34651	4.29818e-49	1.22842e-47	-4.54486	1.29733e-56	5.78461e-55	-4.35156	2.46008e-54	8.8425e-53	-4.9434	1.73509e-153	5.24624e-152
ENSG00000205302	SNX2	-2.44505	3.77159e-33	1.29551e-32	-2.7109	6.33374e-41	3.47247e-40	-2.46563	3.20887e-48	2.79957e-47	-2.63259	6.09235e-38	5.69239e-37	-2.38035	2.78027e-39	2.28021e-38	-2.50916	1.83783e-40	1.63067e-39	-3.62312	7.46285e-97	5.49668e-96
ENSG00000205323	SARNP	-3.55564	4.10099e-79	3.0573e-77	-3.70098	1.32493e-86	1.34304e-84	-2.88425	1.3736e-55	2.00145e-54	-3.00541	1.05457e-46	2.33263e-45	-2.83468	5.10572e-45	6.99802e-44	-3.2923	3.02084e-51	7.53338e-50	-3.37165	8.97562e-143	2.05971e-141
ENSG00000205352	PRR13	-3.09868	7.77723e-48	5.90734e-47	-2.55843	1.49891e-48	1.31259e-47	-3.6326	5.89206e-56	8.83183e-55	-3.54048	1.46128e-45	2.84778e-44	-3.67305	2.56333e-48	4.76481e-47	-3.42251	6.64738e-42	6.64738e-41	-2.59723	1.88033e-61	6.36567e-61
ENSG00000205542	TMSB4X	-3.53015	1.07352e-54	1.2378e-53	-2.61189	1.03411e-47	8.57817e-47	-4.02486	7.79891e-54	1.00906e-52	-4.09954	1.97115e-43	3.09281e-42	-3.95012	9.43881e-54	3.21239e-52	-3.75489	3.35579e-44	4.12952e-43	-2.71952	7.42196e-70	3.03381e-69
ENSG00000205744	DENND1C	-3.19554	9.70125e-66	2.38553e-64	-2.91211	1.06344e-58	1.78591e-57	-3.27314	1.69341e-57	2.86093e-56	-3.18257	4.61474e-46	9.59023e-45	-3.28533	1.9586e-52	5.53369e-51	-3.19249	1.00843e-50	2.36814e-49	-2.94073	4.26517e-128	6.71466e-127
ENSG00000205923	CEMP1	-3.36989	7.3018e-48	5.55221e-47	-3.36989	9.94919e-50	9.38942e-49	-3.36989	5.37943e-46	4.04678e-45	-3.36989	5.35543e-36	4.17356e-35	-3.36989	7.04326e-38	5.14194e-37	-3.36989	1.26291e-36	8.17381e-36	-3.36989	1.11128e-117	1.32246e-116
ENSG00000206337	HCP5	-2.93154	1.14906e-32	3.84749e-32	-2.54922	2.43416e-26	6.40235e-26	-2.3746	1.59993e-24	3.89074e-24	-2.22963	1.53031e-17	3.51633e-17	-2.21747	1.15072e-18	2.56829e-18	-2.21839	2.30506e-18	5.0005e-18	-2.88457	3.45733e-71	1.45762e-70
ENSG00000206341	HLA-H	-4.21033	2.20598e-40	1.09099e-39	-4.89406	2.53776e-63	5.7395e-62	-4.40988	1.07426e-51	1.17701e-50	-4.2902	2.62707e-36	2.10794e-35	-4.26144	2.29135e-40	2.05376e-39	-4.34227	1.85984e-39	1.50691e-38	-4.58723	1.33052e-115	1.51964e-114
ENSG00000206503	HLA-A	-3.14304	1.78929e-40	8.88029e-40	-3.19591	3.52063e-39	1.74791e-38	-3.76826	5.33448e-43	3.30968e-42	-3.32822	9.65825e-32	5.36189e-31	-3.61093	3.87177e-37	2.67549e-36	-3.21051	5.00266e-34	2.68524e-33	-3.07802	7.19484e-62	2.45997e-61
ENSG00000206652	RNU1-1	-3.65126	2.54364e-40	1.25446e-39	-3.74913	5.9141e-44	3.88302e-43	-3.08479	8.26104e-24	1.96022e-23	-3.20141	1.57566e-21	4.51424e-21	-3.2234	9.19663e-23	2.50979e-22	-3.16378	1.85472e-24	5.4855e-24	-3.68496	7.06224e-88	4.25972e-87
ENSG00000206737	RNVU1-18	-2.58166	5.15906e-31	1.60042e-30	-2.65368	8.2461e-34	3.09833e-33	-2.5123	3.03853e-27	8.34397e-27	-2.45119	5.36624e-20	1.41117e-19	-2.54428	6.95311e-23	1.91234e-22	-2.4864	1.78275e-21	4.49274e-21	-2.63107	2.59627e-76	1.22921e-75
ENSG00000206828	U1	-4.1913	1.90587e-35	7.32307e-35	-4.95003	2.59555e-42	1.54897e-41	-4.24089	1.18849e-28	3.49453e-28	-4.4149	2.38533e-25	8.65772e-25	-4.23513	4.61242e-25	1.42802e-24	-4.84514	6.90244e-29	2.64066e-28	-5.04557	4.16637e-90	2.66353e-89
ENSG00000206910	SNORA29	-2.26552	1.28638e-47	9.61032e-47	-2.26552	1.79022e-49	1.65948e-48	-2.26552	9.27881e-46	6.86652e-45	-2.26552	8.25081e-36	6.34227e-35	-2.26552	1.10838e-37	7.94759e-37	-2.26552	1.9595e-36	1.24986e-35	-2.26552	4.33247e-117	5.07436e-116
ENSG00000207005	RNU1-2	-3.00245	1.01352e-27	2.71234e-27	-3.15996	1.17979e-31	3.98352e-31	-2.50819	4.63612e-18	8.81075e-18	-2.5521	4.20493e-15	8.62784e-15	-2.39205	4.56708e-13	7.94545e-13	-2.74961	1.91458e-17	3.97003e-17	-2.93075	3.47815e-56	1.06214e-55
ENSG00000207031	SNORD59A	-4.55828	2.50553e-45	1.63062e-44	-5.00495	4.61638e-57	6.99407e-56	-3.39607	1.13872e-30	3.63491e-30	-3.84824	1.84691e-23	5.90491e-23	-3.52858	2.06593e-24	6.16976e-24	-4.00525	5.05093e-32	2.34104e-31	-5.27831	1.24815e-104	1.09232e-103
ENSG00000207051	SNORA27	-2.44402	2.77229e-48	2.15691e-47	-2.44402	3.64338e-50	3.5113e-49	-2.44402	2.1176e-46	1.63401e-45	-2.44402	2.55715e-36	2.05535e-35	-2.44402	3.24333e-38	2.43465e-37	-2.44402	5.95778e-37	3.95781e-36	-2.44402	1.08511e-118	1.33297e-117
ENSG00000207112	SNORA25	-2.11282	1.08099e-35	4.21215e-35	-2.11282	4.22877e-37	1.88376e-36	-2.11282	2.77252e-34	1.06212e-33	-2.11282	9.80753e-27	3.85462e-26	-2.11282	3.72135e-28	1.3719e-27	-2.11282	3.29295e-27	1.13831e-26	-2.11282	2.6048e-88	1.58265e-87
ENSG00000207118	SNORD14D	-4.08941	1.26726e-43	7.49924e-43	-4.08941	2.4879e-45	1.78485e-44	-4.08941	6.47889e-42	3.77377e-41	-4.08941	9.15771e-33	5.51891e-32	-4.08941	1.73773e-34	9.90476e-34	-4.08941	2.44036e-33	1.25491e-32	-4.08941	1.75613e-107	1.6507e-106
ENSG00000207165	SNORA70	-4.46104	1.57324e-74	8.09013e-73	-4.46104	2.21507e-77	1.21441e-75	-4.46104	1.12216e-71	6.53356e-70	-4.46104	2.04722e-56	1.22746e-54	-4.46104	2.77035e-59	1.59129e-57	-4.46104	2.26197e-57	1.18041e-55	-4.46104	1.96745e-181	1.21054e-179
ENSG00000207205	RNVU1-15	-4.93117	2.0407e-41	1.05867e-40	-5.80771	4.52068e-57	6.86383e-56	-5.1351	4.50407e-37	1.99861e-36	-5.29837	1.95143e-32	1.14232e-31	-5.25619	4.72738e-35	2.80813e-34	-5.27101	4.22939e-35	2.4383e-34	-5.8221	3.05062e-124	4.32428e-123
ENSG00000207500	SNORD102	-3.05379	4.78417e-44	2.90431e-43	-3.05379	9.05541e-46	6.66618e-45	-3.05379	2.53697e-42	1.5153e-41	-3.05379	4.35938e-33	2.67991e-32	-3.05379	7.97418e-35	4.64282e-34	-3.05379	1.14757e-33	6.0131e-33	-3.05379	1.68079e-108	1.61875e-107
ENSG00000207501	RNVU1-14	-5.75821	2.64993e-56	3.41293e-55	-5.75821	1.75335e-58	2.89622e-57	-5.75821	4.02116e-54	5.27053e-53	-5.75821	1.89794e-42	2.7012e-41	-5.75821	1.20965e-44	1.59588e-43	-5.75821	3.51534e-43	3.90316e-42	-5.75821	6.46252e-138	1.29526e-136
ENSG00000207556	MIR636	-2.32853	5.87788e-56	7.36826e-55	-2.32853	4.00566e-58	6.48732e-57	-2.32853	8.65999e-54	1.11739e-52	-2.32853	3.49138e-42	4.84188e-41	-2.32853	2.29204e-44	2.93057e-43	-2.32853	6.53079e-43	7.06208e-42	-2.32853	4.34994e-137	8.52443e-136
ENSG00000207601	MIR611	-3.58718	3.16589e-66	8.18484e-65	-3.58718	9.00788e-69	2.81421e-67	-3.58718	1.11734e-63	3.1299e-62	-3.58718	4.7729e-50	1.49777e-48	-3.58718	1.30621e-52	3.77916e-51	-3.58718	6.66909e-51	1.59809e-49	-3.58718	1.25358e-161	4.48299e-160
ENSG00000207605	MIR191	-2.89114	2.14889e-42	1.17538e-41	-2.93934	2.91266e-45	2.08005e-44	-2.38563	1.15644e-23	2.72976e-23	-2.46026	6.81617e-19	1.68846e-18	-2.46753	1.66391e-19	3.87e-19	-2.56075	6.6059e-24	1.89335e-23	-2.95439	3.77095e-105	3.33958e-104
ENSG00000207707	MIR639	-3.68647	3.36176e-65	7.82929e-64	-3.68647	1.04354e-67	3.09536e-66	-3.68647	1.08752e-62	2.78602e-61	-3.68647	2.91869e-49	8.4618e-48	-3.68647	8.71539e-52	2.30394e-50	-3.68647	4.19853e-50	9.24332e-49	-3.68647	3.52678e-159	1.18597e-157
ENSG00000207765	AL132780.1	-4.44489	7.58366e-70	2.61896e-68	-4.44489	1.58739e-72	6.50185e-71	-4.44489	3.63837e-67	1.49025e-65	-4.44489	7.99903e-53	3.45725e-51	-4.44489	1.60986e-55	6.42574e-54	-4.44489	1.00884e-53	3.36043e-52	-4.44489	2.88195e-170	1.33137e-168
ENSG00000207928	MIR632	-3.14604	4.30413e-58	6.22002e-57	-3.14604	2.445e-60	4.56896e-59	-3.14604	7.60782e-56	1.13313e-54	-3.14604	8.10807e-44	1.33305e-42	-3.14604	4.43519e-46	6.70878e-45	-3.14604	1.42715e-44	1.83473e-43	-3.14604	3.38363e-142	7.6772e-141
ENSG00000207939	MIR223	-3.95695	1.55747e-34	5.73718e-34	-3.95695	6.74418e-36	2.83997e-35	-3.95695	3.6085e-33	1.29836e-32	-3.95695	7.41115e-26	2.77426e-25	-3.95695	3.1147e-27	1.08953e-26	-3.95695	2.57463e-26	8.44427e-26	-3.95695	1.69538e-85	9.73029e-85
ENSG00000208028	MIR616	-5.72224	2.79673e-51	2.60277e-50	-6.15834	7.8746e-50	7.48167e-49	-6.45652	1.27156e-46	9.9535e-46	-6.53741	4.37516e-37	3.77271e-36	-6.36511	6.31826e-38	4.63427e-37	-6.63272	3.60648e-40	3.10797e-39	-5.71363	1.03149e-91	6.79462e-91
ENSG00000209042	SNORD12C	-4.01933	4.45126e-35	1.68191e-34	-3.9598	9.16842e-35	3.63282e-34	-3.0188	2.93776e-19	5.86311e-19	-3.11145	3.61869e-17	8.16713e-17	-2.84401	3.675e-16	7.31057e-16	-3.4179	5.41595e-20	1.26973e-19	-3.94728	1.39538e-64	5.07116e-64
ENSG00000209082	MT-TL1	-7.26866	1.99239e-71	7.86351e-70	-7.37101	2.68122e-77	1.46428e-75	-7.35993	1.17842e-67	5.09325e-66	-7.35003	4.24183e-55	2.19733e-53	-7.40654	2.22834e-60	1.40795e-58	-7.40654	1.96476e-58	1.16808e-56	-7.37863	5.1917e-174	2.6219e-172
ENSG00000209582	SNORA48	-2.78296	3.1236e-57	4.24822e-56	-2.78296	1.90944e-59	3.36299e-58	-2.78296	5.13059e-55	7.21457e-54	-2.78296	3.6959e-43	5.66651e-42	-2.78296	2.17589e-45	3.08124e-44	-2.78296	6.66679e-44	7.94713e-43	-2.78296	3.87661e-140	8.20142e-139
ENSG00000210077	MT-TV	-5.02747	7.61116e-59	1.15437e-57	-5.02747	4.05518e-61	7.95787e-60	-4.98646	3.17341e-53	3.94995e-52	-4.99231	3.04887e-42	4.25332e-41	-5.02747	1.10418e-46	1.76794e-45	-4.96851	2.42572e-43	2.73427e-42	-5.01073	1.08581e-137	2.16702e-136
ENSG00000210100	MT-TI	-4.26511	2.74491e-55	3.32266e-54	-4.26511	1.98055e-57	3.08013e-56	-4.26511	3.81957e-53	4.71258e-52	-4.26511	1.13508e-41	1.50454e-40	-4.26511	7.89066e-44	9.62592e-43	-4.26511	2.16413e-42	2.24045e-41	-4.26511	1.74059e-135	3.28312e-134
ENSG00000210107	MT-TQ	-4.68497	1.05117e-56	1.3855e-55	-4.6885	4.3055e-59	7.4162e-58	-4.56626	5.03566e-46	3.79425e-45	-4.50878	4.49973e-35	3.26138e-34	-4.68337	2.06188e-44	2.6483e-43	-4.70651	3.65853e-44	4.4825e-43	-4.69968	7.33496e-139	1.51096e-137
ENSG00000210112	MT-TM	-4.82535	3.5781e-62	6.74003e-61	-4.81934	2.79568e-64	6.74506e-63	-4.78458	1.09467e-55	1.61001e-54	-4.82535	6.08886e-47	1.37708e-45	-4.82535	2.35217e-49	4.881e-48	-4.82535	9.54393e-48	1.63793e-46	-4.78035	3.60478e-135	6.77218e-134
ENSG00000210117	MT-TW	-5.56417	4.24603e-51	3.90768e-50	-5.57112	3.04395e-53	3.57708e-52	-5.5462	6.52426e-48	5.58826e-47	-5.52512	1.80946e-37	1.61977e-36	-5.57112	1.36044e-40	1.24633e-39	-5.57112	2.96263e-39	2.35573e-38	-5.56329	1.9028e-124	2.70539e-123
ENSG00000210127	MT-TA	-7.89998	2.99543e-60	4.98295e-59	-7.88601	2.73905e-62	5.83861e-61	-7.67884	3.80967e-50	3.80157e-49	-7.13541	8.09585e-31	4.21391e-30	-7.69896	1.31539e-43	1.57067e-42	-7.84328	3.68902e-45	5.09591e-44	-7.91184	6.34474e-147	1.62246e-145
ENSG00000210135	MT-TN	-8.25729	1.16095e-61	2.12439e-60	-8.26011	4.16923e-64	9.90631e-63	-8.25861	3.58213e-59	6.94253e-58	-8.08896	3.3778e-43	5.1901e-42	-8.27244	3.54047e-49	7.21927e-48	-8.25511	2.82213e-47	4.63448e-46	-8.26086	1.04753e-149	2.86596e-148
ENSG00000210140	MT-TC	-8.17359	1.89107e-56	2.45577e-55	-7.91222	5.09542e-53	5.87516e-52	-7.39154	1.42921e-36	6.17148e-36	-6.45056	9.80765e-25	3.39366e-24	-7.28738	6.57021e-35	3.85084e-34	-6.90068	1.71925e-33	8.9158e-33	-8.56411	1.004e-147	2.65411e-146
ENSG00000210144	MT-TY	-8.0242	1.44546e-61	2.61445e-60	-7.8619	2.66399e-60	4.94541e-59	-6.21415	5.77564e-32	1.9652e-31	-5.41162	6.70108e-21	1.85534e-20	-6.58177	1.04455e-31	4.86375e-31	-5.6505	4.40537e-25	1.34763e-24	-7.89465	4.52534e-130	7.45754e-129
ENSG00000210151	MT-TS1	-6.06651	7.27237e-61	1.26192e-59	-6.06651	3.26275e-63	7.32041e-62	-6.06651	1.62763e-58	3.00962e-57	-6.06651	6.11493e-46	1.24869e-44	-6.06651	2.64063e-48	4.89558e-47	-6.06651	9.94749e-47	1.54873e-45	-6.03454	2.10769e-141	4.62575e-140
ENSG00000210154	MT-TD	-4.44043	4.11123e-44	2.50767e-43	-4.44043	7.73757e-46	5.72296e-45	-4.44043	2.19255e-42	1.31516e-41	-4.44043	3.88377e-33	2.398e-32	-4.41497	4.41257e-34	2.43434e-33	-4.44043	1.02043e-33	5.37689e-33	-4.43755	2.89581e-108	2.77565e-107
ENSG00000210156	MT-TK	-6.02491	9.09106e-66	2.24725e-64	-6.0259	2.37973e-68	7.25766e-67	-6.03189	1.67909e-63	4.60279e-62	-6.03189	6.60006e-50	2.02603e-48	-6.03189	1.83466e-52	5.21176e-51	-6.03189	9.27026e-51	2.18425e-49	-6.02479	6.05466e-159	2.0312e-157
ENSG00000210164	MT-TG	-4.0019	1.10061e-57	1.54766e-56	-3.99119	5.6476e-59	9.65713e-58	-4.0019	1.87895e-55	2.71255e-54	-4.0019	1.66344e-43	2.64536e-42	-4.0019	9.42152e-46	1.36714e-44	-4.0019	2.96211e-44	3.65786e-43	-3.99902	3.60727e-140	7.65457e-139
ENSG00000210174	MT-TR	-3.32409	4.60167e-42	2.47094e-41	-3.32409	1.03389e-43	6.6762e-43	-3.32409	2.05558e-40	1.108e-39	-3.32409	1.4124e-31	7.73742e-31	-3.32409	3.069e-33	1.59272e-32	-3.32409	3.93773e-32	1.83656e-31	-3.31667	2.00227e-101	1.64214e-100
ENSG00000210176	MT-TH	-3.67979	1.02263e-50	9.22465e-50	-3.67979	1.09078e-52	1.22463e-51	-3.67979	9.62498e-49	8.6711e-48	-3.59729	6.07936e-34	3.99525e-33	-3.67979	3.64703e-40	3.20966e-39	-3.67979	7.70278e-39	5.94371e-38	-3.67979	1.56712e-124	2.23263e-123
ENSG00000210184	MT-TS2	-4.1909	1.19932e-61	2.18892e-60	-4.1893	9.70432e-64	2.24522e-62	-4.19837	9.51677e-60	1.902e-58	-4.19837	6.39339e-47	1.43902e-45	-4.19837	2.47563e-49	5.12212e-48	-4.17805	2.45469e-46	3.71899e-45	-4.19042	2.03768e-147	5.36652e-146
ENSG00000210191	MT-TL2	-3.58345	3.80459e-60	6.2845e-59	-3.57813	4.15654e-62	8.6764e-61	-3.49571	4.28231e-45	3.00936e-44	-3.42703	3.5521e-33	2.19996e-32	-3.53012	4.34068e-42	4.5371e-41	-3.58345	3.605e-46	5.38647e-45	-3.56456	5.23981e-135	9.73997e-134
ENSG00000210194	MT-TE	-5.90884	1.75432e-54	1.99021e-53	-5.89998	2.46652e-56	3.54987e-55	-5.76524	8.64028e-47	6.86254e-46	-5.71046	1.11811e-35	8.52961e-35	-5.89025	1.61552e-42	1.76591e-41	-5.87025	1.00652e-40	9.09674e-40	-5.8845	9.70968e-129	1.55113e-127
ENSG00000210195	MT-TT	-5.02029	4.54898e-55	5.43179e-54	-5.02724	2.04801e-57	3.17803e-56	-4.91672	1.86719e-32	6.49787e-32	-5.03306	8.55228e-42	1.14436e-40	-5.03306	5.86406e-44	7.20983e-43	-5.03306	1.62311e-42	1.70035e-41	-4.99448	1.84389e-127	2.86128e-126
ENSG00000211517	MIR671	-2.66881	1.21121e-62	2.36699e-61	-2.66881	4.67158e-65	1.18173e-63	-2.66881	3.15338e-60	6.53399e-59	-2.66881	2.65561e-47	6.38524e-46	-2.66881	9.85607e-50	2.12018e-48	-2.66881	4.10731e-48	7.35349e-47	-2.66881	4.49304e-153	1.34125e-151
ENSG00000211592	IGKC	-2.9827	1.24083e-29	3.61899e-29	-2.89621	1.02723e-29	3.15881e-29	-2.76639	1.64961e-22	3.72067e-22	-2.78541	4.14162e-19	1.03891e-18	-2.81251	8.71418e-20	2.05185e-19	-2.84453	1.11538e-20	2.70838e-20	-2.84873	5.76919e-56	1.75114e-55
ENSG00000211597	IGKJ1	-5.68353	1.55164e-38	6.93172e-38	-5.68353	4.73555e-40	2.47034e-39	-5.68353	5.10179e-37	2.25272e-36	-5.68353	6.81224e-29	3.10629e-28	-5.68353	2.01375e-30	8.60073e-30	-5.68353	2.10454e-29	8.29917e-29	-5.68353	3.36582e-95	2.39155e-94
ENSG00000211699	TRGV3	-2.34915	6.35877e-33	2.15476e-32	-2.37323	9.77846e-35	3.87018e-34	-2.1016	1.35084e-25	3.44556e-25	-2.17175	1.26964e-20	3.45553e-20	-2.14686	2.56851e-22	6.85682e-22	-2.25974	2.73076e-23	7.58902e-23	-2.42299	1.87768e-84	1.05153e-83
ENSG00000212066	AL645941.1	-3.46294	8.06795e-50	6.8979e-49	-3.46294	9.29342e-52	9.86027e-51	-3.46294	7.03135e-48	6.01163e-47	-3.46294	1.71738e-37	1.54127e-36	-3.46294	1.90837e-39	1.58263e-38	-3.46294	3.82862e-38	2.79076e-37	-3.46294	2.22572e-122	3.00674e-121
ENSG00000212084	AL121914.1	-3.98691	6.44852e-50	5.57079e-49	-3.98691	7.36629e-52	7.87489e-51	-3.98691	5.66709e-48	4.87481e-47	-3.98691	1.44727e-37	1.30886e-36	-3.98691	1.59481e-39	1.33279e-38	-3.98691	3.21746e-38	2.35992e-37	-3.98691	1.30003e-122	1.76809e-121
ENSG00000212498	SNORD86	-2.99947	3.15173e-59	4.89612e-58	-2.99947	1.62536e-61	3.2857e-60	-2.99947	6.13654e-57	9.92696e-56	-2.99947	1.09595e-44	1.95964e-43	-2.99947	5.4414e-47	8.98063e-46	-2.99947	1.86774e-45	2.64488e-44	-2.99947	6.52213e-145	1.59543e-143
ENSG00000212802	RPL15P3	-3.08456	9.12383e-53	9.43176e-52	-3.07024	3.96387e-59	6.84447e-58	-4.02433	5.65136e-64	1.65203e-62	-4.05414	4.43382e-55	2.28837e-53	-4.08134	2.77826e-59	1.59129e-57	-3.98564	8.71851e-55	3.3201e-53	-3.02863	4.32374e-95	3.06292e-94
ENSG00000213080	RP11-312J18.5	-2.43654	1.03028e-58	1.55093e-57	-2.38584	2.71943e-60	5.04169e-59	-2.45907	1.08842e-53	1.38661e-52	-2.53832	1.80929e-44	3.18263e-43	-2.57632	5.62117e-49	1.1171e-47	-2.59135	3.93921e-48	7.06151e-47	-2.5541	7.62357e-140	1.61044e-138
ENSG00000213189	BTF3L4P2	-3.24999	6.03452e-70	2.11964e-68	-3.22712	3.1353e-73	1.33062e-71	-3.0369	4.6548e-50	4.60254e-49	-3.03065	2.30103e-37	2.0327e-36	-3.04633	1.3378e-43	1.59472e-42	-3.13634	1.09301e-44	1.43128e-43	-3.37286	1.21932e-146	3.09552e-145
ENSG00000213203	GIMAP1	-3.03531	5.39036e-43	3.07242e-42	-2.73443	1.54538e-38	7.41131e-38	-2.84944	5.22269e-38	2.43587e-37	-2.61316	7.81831e-27	3.09351e-26	-2.75443	9.74621e-31	4.25152e-30	-2.62075	1.63061e-28	6.10882e-28	-2.65072	1.04713e-77	5.0911e-77
ENSG00000213204	C6orf165	-2.61563	1.13916e-51	1.08451e-50	-2.98965	9.98564e-62	2.0391e-60	-2.26952	6.44478e-43	3.97927e-42	-2.4416	9.5861e-34	6.21575e-33	-2.32146	1.69096e-33	8.93687e-33	-2.77144	6.54674e-44	7.81063e-43	-3.06553	1.9037e-150	5.29055e-149
ENSG00000213316	LTC4S	-2.75009	4.10283e-24	9.4459e-24	-3.03211	1.45752e-28	4.24043e-28	-2.9613	1.92433e-25	4.86782e-25	-2.8981	2.99449e-19	7.56949e-19	-2.94912	8.70504e-21	2.15069e-20	-2.92225	7.48056e-20	1.74274e-19	-2.97398	1.64577e-65	6.11199e-65
ENSG00000213442	RPL18AP3	-2.43042	3.22139e-42	1.74441e-41	-2.78433	5.53267e-43	3.41012e-42	-4.38296	1.9325e-61	4.46376e-60	-4.34608	9.73682e-52	3.74841e-50	-4.4097	1.87861e-55	7.45625e-54	-4.0642	2.62665e-50	5.90264e-49	-2.41941	1.1467e-79	5.79728e-79
ENSG00000213443	CLEC2D	-2.6337	2.90882e-47	2.12689e-46	-2.6337	4.17334e-49	3.7718e-48	-2.6337	2.03519e-45	1.47282e-44	-2.6337	1.53783e-35	1.16058e-34	-2.6337	2.12997e-37	1.49982e-36	-2.6337	3.68963e-36	2.31877e-35	-2.6337	3.07799e-116	3.55483e-115
ENSG00000213553	RPLP0P6	-2.49575	2.18026e-47	1.6109e-46	-2.27572	1.27455e-40	6.8596e-40	-2.86296	8.18773e-47	6.51044e-46	-2.80751	5.10814e-37	4.3753e-36	-2.77554	1.93398e-36	1.26098e-35	-2.8596	3.45763e-37	2.34673e-36	-2.70013	2.29537e-98	1.75389e-97
ENSG00000213588	ZBTB9	-2.00892	1.67249e-50	1.49242e-49	-2.00869	1.83769e-52	2.04204e-51	-2.00858	1.57691e-48	1.40092e-47	-2.00725	5.55314e-38	5.21022e-37	-2.0075	5.7667e-40	4.99709e-39	-2.00907	1.12241e-38	8.58561e-38	-2.00907	5.01538e-124	7.06667e-123
ENSG00000213614	HEXA	-2.40279	2.20121e-48	1.72306e-47	-2.85212	7.78572e-60	1.40462e-58	-2.35818	2.15932e-43	1.37296e-42	-2.36936	2.85243e-34	1.92577e-33	-2.25101	5.49382e-35	3.2429e-34	-2.60274	7.00629e-38	5.01364e-37	-2.698	8.94415e-111	9.02098e-110
ENSG00000213689	TREX1	-3.74347	4.20044e-76	2.43557e-74	-3.74347	5.17693e-79	3.1577e-77	-3.74347	3.42274e-73	2.17236e-71	-3.74347	1.2705e-57	8.32618e-56	-3.74347	1.50481e-60	9.59402e-59	-3.74347	1.34279e-58	8.08541e-57	-3.74347	3.49818e-185	2.33599e-183
ENSG00000213719	CLIC1	-4.77773	1.48544e-48	1.17517e-47	-4.02704	4.38809e-35	1.77107e-34	-4.40733	6.42909e-46	4.80053e-45	-4.06332	6.20933e-31	3.24757e-30	-4.23032	5.17524e-31	2.29667e-30	-4.01145	1.72392e-34	9.56676e-34	-4.37516	3.03654e-71	1.28214e-70
ENSG00000213763	ACTBP2	-4.05185	1.09697e-69	3.77906e-68	-3.79001	7.17187e-66	1.92847e-64	-4.12893	2.10535e-61	4.82348e-60	-4.13084	2.23042e-52	9.13563e-51	-4.22214	4.2345e-58	2.1696e-56	-4.16497	2.37678e-55	9.65095e-54	-4.21678	1.66309e-173	8.30957e-172
ENSG00000213772	EIF1P7	-2.5993	1.53169e-51	1.44745e-50	-2.33014	4.60888e-45	3.2551e-44	-2.64202	5.44291e-40	2.86052e-39	-2.75146	1.70067e-32	1.0001e-31	-2.55731	7.29806e-32	3.44142e-31	-2.76111	1.80719e-38	1.3566e-37	-2.94372	3.44105e-122	4.62638e-121
ENSG00000213782	DDX47	-4.06447	5.10693e-72	2.14157e-70	-4.45637	1.20013e-80	8.169e-79	-4.16286	1.73417e-72	1.05777e-70	-4.22395	2.89792e-56	1.70844e-54	-4.126	7.65775e-59	4.24341e-57	-4.37863	6.26753e-60	4.39351e-58	-4.59521	4.11545e-193	3.31353e-191
ENSG00000213920	MDP1	-3.40714	1.25767e-79	9.68333e-78	-3.44836	1.90629e-84	1.63778e-82	-3.36454	7.42474e-74	5.05384e-72	-3.35543	2.48823e-58	1.78874e-56	-3.37475	2.59587e-61	1.80176e-59	-3.35295	1.09528e-59	7.41944e-58	-3.43654	5.96798e-192	4.72409e-190
ENSG00000213928	IRF9	-4.97164	5.64168e-73	2.53966e-71	-5.0155	4.42336e-70	1.53213e-68	-5.32404	1.07224e-77	9.68452e-76	-5.1999	6.02958e-55	3.10061e-53	-5.22579	1.82649e-62	1.39866e-60	-5.23207	6.05862e-59	3.77725e-57	-5.04643	4.26572e-169	1.89603e-167
ENSG00000213977	TAX1BP3	-4.51186	3.45575e-72	1.4755e-70	-4.33075	4.06905e-70	1.41913e-68	-3.7941	4.85615e-55	6.83548e-54	-3.52961	2.02468e-42	2.86999e-41	-3.69363	7.65342e-44	9.35271e-43	-3.66157	1.1397e-46	1.76854e-45	-4.11474	1.80531e-130	2.99963e-129
ENSG00000214027	ARPC3P5	-2.2802	2.17761e-67	6.16116e-66	-2.20747	3.21739e-66	8.80252e-65	-2.16292	1.26024e-53	1.59827e-52	-2.10315	1.35305e-38	1.33692e-37	-2.08709	3.06131e-41	2.96453e-40	-2.21224	1.29827e-46	2.00797e-45	-2.29174	2.68283e-160	9.21978e-159
ENSG00000214212	C19orf38	-3.13284	3.27246e-46	2.24047e-45	-2.78205	2.55153e-37	1.14713e-36	-3.05881	2.12676e-43	1.35409e-42	-2.89725	1.33351e-31	7.3138e-31	-2.90693	3.12444e-34	1.74488e-33	-2.9094	4.94154e-34	2.65445e-33	-3.03962	5.91625e-97	4.36897e-96
ENSG00000214265	SNURF	-4.08789	3.71986e-80	2.96117e-78	-4.08789	3.2545e-83	2.53348e-81	-4.08789	4.27006e-77	3.69111e-75	-4.08789	9.86385e-61	8.79631e-59	-4.08789	8.2915e-64	6.87219e-62	-4.08789	9.299e-62	7.70723e-60	-4.08789	7.72844e-195	6.48177e-193
ENSG00000214274	ANG	-2.66894	9.38137e-43	5.2579e-42	-2.65373	1.77929e-42	1.06909e-41	-2.64249	1.20349e-40	6.57763e-40	-2.64889	1.23846e-31	6.80311e-31	-2.59511	8.51251e-33	4.28056e-32	-2.63836	1.73095e-32	8.3154e-32	-2.6741	1.22706e-97	9.21606e-97
ENSG00000214485	RPL7P1	-2.2935	4.24678e-47	3.0733e-46	-2.46123	3.6346e-53	4.24991e-52	-3.26512	4.94279e-66	1.80424e-64	-3.26178	1.21095e-52	5.12382e-51	-3.2876	5.87159e-58	2.95467e-56	-3.26249	1.25443e-54	4.6759e-53	-2.84785	3.36696e-110	3.33853e-109
ENSG00000214717	ZBED1	-2.82402	6.33752e-54	6.97077e-53	-2.82402	5.1374e-56	7.2531e-55	-2.82402	7.84922e-52	8.73583e-51	-2.82402	1.25249e-40	1.51222e-39	-2.82402	9.78479e-43	1.08643e-41	-2.82368	2.504e-41	2.37425e-40	-2.82387	3.25275e-132	5.67921e-131
ENSG00000214736	TOMM6	-5.9349	1.61022e-100	1.26045e-97	-5.9349	2.52567e-104	1.69461e-101	-5.9349	1.03107e-96	8.54579e-94	-5.9349	2.28513e-76	1.89397e-73	-5.9349	3.44154e-80	2.55218e-77	-5.9349	1.21445e-77	8.55578e-75	-5.9349	2.59549e-243	1.82852e-240
ENSG00000215068	AC025171.1	-3.08891	1.49508e-50	1.34006e-49	-2.82592	5.9381e-45	4.15637e-44	-2.28444	8.34373e-35	3.28848e-34	-2.24818	2.09662e-25	7.63936e-25	-2.03499	4.27979e-24	1.25839e-23	-2.48169	1.55083e-29	6.14659e-29	-2.94359	6.97771e-112	7.22912e-111
ENSG00000215472	RPL17-C18orf32	-6.27229	1.48931e-115	6.99478e-112	-6.27229	6.57757e-120	3.08927e-116	-6.27229	3.38692e-111	1.59072e-107	-6.27229	6.47397e-88	3.04061e-84	-6.27229	2.74491e-92	1.28919e-88	-6.27229	2.25497e-89	1.05908e-85	-6.27229	4.46719e-279	2.09809e-275
ENSG00000215492	HNRNPA1P7	-3.0425	1.44464e-71	5.81569e-70	-3.05449	1.24758e-74	5.70726e-73	-3.05664	6.63941e-69	3.09766e-67	-3.06243	1.84285e-54	9.24048e-53	-3.04361	1.0881e-56	4.89818e-55	-3.04079	8.47194e-55	3.23495e-53	-3.06899	9.94684e-176	5.28871e-174
ENSG00000215769	MIR6080	-2.56147	9.2674e-37	3.78157e-36	-3.15349	1.15389e-53	1.38486e-52	-2.94548	9.31001e-49	8.39808e-48	-2.91328	1.50369e-37	1.35814e-36	-2.95848	2.18006e-40	1.959e-39	-3.19395	1.74108e-41	1.67567e-40	-2.98341	1.27803e-107	1.20532e-106
ENSG00000215837	SDHAP2	-3.52186	1.13194e-55	1.39904e-54	-3.52186	7.90354e-58	1.26117e-56	-3.52186	1.62769e-53	2.05687e-52	-3.52186	5.76409e-42	7.81675e-41	-3.52186	3.87728e-44	4.88211e-43	-3.52186	1.08699e-42	1.15503e-41	-3.52186	2.08798e-136	4.04115e-135
ENSG00000215866	LINC01356	-2.79443	1.88489e-44	1.16842e-43	-2.89367	2.0105e-48	1.74756e-47	-2.77873	6.04743e-40	3.17113e-39	-2.74706	1.15698e-31	6.3754e-31	-2.80456	1.82289e-35	1.11044e-34	-2.87337	5.86562e-35	3.356e-34	-2.80596	4.87149e-104	4.21617e-103
ENSG00000216042	MIR922	-3.65237	9.8147e-63	1.92872e-61	-3.65237	3.7562e-65	9.60524e-64	-3.65237	2.57516e-60	5.37541e-59	-3.65237	2.26041e-47	5.50072e-46	-3.65237	8.32435e-50	1.80169e-48	-3.65237	3.48702e-48	6.28288e-47	-3.65237	2.71864e-153	8.15013e-152
ENSG00000216054	AC019201.1	-3.98773	3.57822e-32	1.16923e-31	-3.98773	1.90745e-33	7.05036e-33	-3.93458	7.7276e-30	2.38776e-29	-3.94521	1.89318e-23	6.04463e-23	-3.98773	2.35449e-25	7.42165e-25	-3.98773	1.6929e-24	5.01746e-24	-3.98773	9.45716e-80	4.79494e-79
ENSG00000216490	IFI30	-7.25595	5.79872e-73	2.59378e-71	-7.21755	5.11594e-75	2.43526e-73	-7.19143	1.98175e-69	9.49759e-68	-7.16471	3.20416e-54	1.57855e-52	-7.16955	4.41212e-57	2.07223e-55	-7.22807	5.58676e-56	2.40726e-54	-7.23243	2.19714e-174	1.12166e-172
ENSG00000217555	CKLF	-5.28817	6.12924e-63	1.21635e-61	-5.60212	6.49232e-70	2.23114e-68	-5.22717	1.42684e-58	2.66281e-57	-5.25171	9.63081e-46	1.91124e-44	-5.11506	1.30095e-47	2.26302e-46	-5.40062	7.16688e-48	1.24822e-46	-5.3478	2.22232e-142	5.07495e-141
ENSG00000218537	MIF-AS1	-3.93057	4.74006e-52	4.64447e-51	-4.84441	1.43019e-70	5.12756e-69	-4.7761	9.96153e-64	2.80156e-62	-4.58502	5.20663e-48	1.34856e-46	-4.74577	7.88772e-54	2.71068e-52	-4.70508	6.40273e-53	1.98274e-51	-5.06893	1.02133e-157	3.35443e-156
ENSG00000219200	RNASEK	-5.59657	1.05696e-81	9.36641e-80	-5.92706	1.12087e-94	2.19348e-92	-6.08262	2.04608e-85	3.39167e-83	-6.02934	7.39408e-64	8.90449e-62	-6.04404	5.72229e-70	8.95856e-68	-5.9004	5.61512e-71	1.19874e-68	-5.85155	1.73861e-163	6.58522e-162
ENSG00000219410	RP4-761J14.8	-3.31178	2.05413e-70	7.57663e-69	-3.41802	3.05901e-75	1.46604e-73	-3.17717	1.15072e-59	2.2804e-58	-3.15657	8.62654e-47	1.92933e-45	-3.1344	7.59387e-51	1.80131e-49	-3.24792	2.14227e-51	5.43866e-50	-3.45881	1.10693e-175	5.84145e-174
ENSG00000219507	FTH1P8	-5.53024	6.02834e-60	9.81957e-59	-4.31886	5.83113e-49	5.21655e-48	-6.19809	7.52032e-63	1.95141e-61	-6.1474	2.27181e-49	6.6687e-48	-6.20869	2.48425e-53	8.04669e-52	-6.12606	4.27881e-51	1.05032e-49	-5.45038	9.1346e-126	1.35623e-124
ENSG00000220130	RP1-72A23.3	-2.82844	4.44605e-59	6.8315e-58	-2.81118	2.75713e-61	5.49475e-60	-2.72037	2.84327e-45	2.02536e-44	-2.76915	7.75595e-37	6.56344e-36	-2.78256	1.71503e-42	1.86312e-41	-2.82065	7.11135e-44	8.43425e-43	-2.80673	5.67848e-121	7.42895e-120
ENSG00000220842	RP11-572P18.1	-3.4829	4.59221e-54	5.07882e-53	-3.69626	3.49265e-55	4.62948e-54	-4.03622	7.32676e-47	5.83903e-46	-4.02243	1.57171e-37	1.41504e-36	-3.82287	4.24449e-45	5.85175e-44	-4.07915	2.67304e-43	2.99866e-42	-2.34872	1.64098e-68	6.49114e-68
ENSG00000221062	MIR1292	-2.97887	7.82821e-58	1.11077e-56	-2.97887	4.5464e-60	8.28703e-59	-2.97887	1.35339e-55	1.97404e-54	-2.97887	1.2816e-43	2.05904e-42	-2.97887	7.16771e-46	1.05201e-44	-2.97887	2.27258e-44	2.83871e-43	-2.97887	1.41495e-141	3.11509e-140
ENSG00000221125	U3	-3.20896	6.10965e-49	4.93324e-48	-3.20896	7.58908e-51	7.60528e-50	-3.20896	4.93766e-47	3.97779e-46	-3.20896	8.05949e-37	6.80396e-36	-3.20896	9.6598e-39	7.57831e-38	-3.20896	1.84265e-37	1.27707e-36	-3.20896	2.87156e-120	3.68155e-119
ENSG00000221420	SNORA81	-2.71134	8.04007e-49	6.45129e-48	-2.71134	1.00897e-50	1.00398e-49	-2.71134	6.43158e-47	5.14892e-46	-2.71134	9.93922e-37	8.33593e-36	-2.71134	1.20357e-38	9.36408e-38	-2.71134	2.2802e-37	1.56943e-36	-2.71134	5.55186e-120	7.04736e-119
ENSG00000221566	MIR1181	-3.75623	1.37748e-69	4.68808e-68	-3.75623	2.94734e-72	1.18651e-70	-3.75623	6.46506e-67	2.56757e-65	-3.75623	1.26414e-52	5.31695e-51	-3.75623	2.60073e-55	1.0179e-53	-3.75623	1.60608e-53	5.20221e-52	-3.75623	1.19658e-169	5.43865e-168
ENSG00000221792	MIR1282	-7.47496	5.44823e-90	9.5957e-88	-7.47496	2.07738e-93	3.52654e-91	-7.47496	1.43509e-86	2.69605e-84	-7.47496	2.78444e-68	5.09516e-66	-7.47496	1.01966e-71	1.84192e-69	-7.47496	1.98991e-69	3.41924e-67	-7.47496	2.96296e-218	5.56642e-216
ENSG00000221874	ZNF321P	-2.72778	4.72046e-52	4.62849e-51	-2.72778	4.49087e-54	5.51188e-53	-2.72778	4.98141e-50	4.91169e-49	-2.72778	3.38028e-39	3.55169e-38	-2.72778	3.10054e-41	2.99839e-40	-2.72778	7.0689e-40	5.92509e-39	-2.72778	9.81458e-128	1.53142e-126
ENSG00000222047	C10orf55	-2.22345	4.04271e-29	1.15588e-28	-2.21741	3.42786e-30	1.07954e-29	-2.17035	6.8631e-27	1.85464e-26	-2.17746	3.72811e-21	1.04619e-20	-2.21316	8.40784e-23	2.29943e-22	-2.21267	4.90379e-22	1.26965e-21	-2.22065	3.80974e-72	1.63557e-71
ENSG00000222057	RNU4-62P	-3.13379	6.74196e-32	2.17577e-31	-3.08484	1.89306e-32	6.68836e-32	-2.83929	6.93593e-24	1.65191e-23	-2.91762	1.014e-19	2.63603e-19	-2.57546	3.03746e-17	6.32542e-17	-3.01863	2.59405e-22	6.83436e-22	-2.16781	1.79744e-27	3.18646e-27
ENSG00000222309	AL391839.1	-3.52193	3.12312e-59	4.85704e-58	-3.52193	1.61006e-61	3.25945e-60	-3.52193	6.08289e-57	9.85149e-56	-3.52193	1.08833e-44	1.95096e-43	-3.52193	5.40172e-47	8.93313e-46	-3.52193	1.85454e-45	2.62882e-44	-3.52193	6.38149e-145	1.56374e-143
ENSG00000222328	RNU2-2P	-5.88887	6.39973e-58	9.13599e-57	-5.88887	3.68917e-60	6.78596e-59	-5.88887	1.11471e-55	1.63777e-54	-5.88887	1.09845e-43	1.77694e-42	-5.88887	6.09766e-46	9.04379e-45	-5.88887	1.94296e-44	2.45528e-43	-5.88887	8.73862e-142	1.94207e-140
ENSG00000222724	RNU2-63P	-4.24278	5.30251e-41	2.69622e-40	-4.28986	3.47902e-43	2.17671e-42	-3.71996	1.89642e-29	5.77119e-29	-3.87882	1.41257e-24	4.85323e-24	-3.63843	6.51685e-24	1.89598e-23	-3.92983	7.21491e-27	2.44253e-26	-4.26969	1.5209e-99	1.19318e-98
ENSG00000223086	RNA5SP155	-3.22347	1.86056e-33	6.48895e-33	-3.15764	3.46173e-32	1.20464e-31	-3.09249	2.39245e-26	6.30794e-26	-3.02524	1.56635e-21	4.49031e-21	-3.11883	1.0818e-22	2.94088e-22	-3.24881	1.87265e-25	5.85047e-25	-3.36922	5.23282e-84	2.89935e-83
ENSG00000223134	AL122015.1	-3.30537	1.16163e-49	9.84207e-49	-3.30537	1.35637e-51	1.42621e-50	-3.30537	9.98724e-48	8.46183e-47	-3.30537	2.26866e-37	2.00536e-36	-3.30537	2.55553e-39	2.10201e-38	-3.30537	5.08064e-38	3.66921e-37	-3.30537	5.33837e-122	7.12963e-121
ENSG00000223274	RNA5SP498	-2.82046	8.16077e-48	6.19199e-47	-2.82046	1.11658e-49	1.04884e-48	-2.82046	5.98734e-46	4.48494e-45	-2.82046	5.82987e-36	4.53327e-35	-2.82046	7.69923e-38	5.60342e-37	-2.82046	1.3767e-36	8.87441e-36	-2.82046	1.45168e-117	1.72173e-116
ENSG00000223361	FTH1P10	-6.17798	9.10958e-71	3.44113e-69	-6.0793	4.37516e-72	1.72559e-70	-6.18932	4.32909e-68	1.91814e-66	-6.17123	2.06778e-53	9.30833e-52	-6.16996	5.22826e-56	2.2122e-54	-6.17806	2.13534e-54	7.73443e-53	-5.85696	1.54772e-151	4.45958e-150
ENSG00000223534	HLA-DQB1-AS1	-5.70839	2.23623e-59	3.52839e-58	-5.56081	7.84501e-57	1.17218e-55	-5.35156	3.9685e-50	3.94888e-49	-5.4732	1.46585e-40	1.75478e-39	-5.43456	2.1377e-43	2.50168e-42	-5.55638	2.1375e-43	2.42102e-42	-5.67498	8.34559e-140	1.76032e-138
ENSG00000223551	TMSB4XP4	-4.13172	7.91405e-56	9.85061e-55	-3.32473	2.10729e-45	1.51566e-44	-4.57092	3.58743e-43	2.24953e-42	-4.42954	1.00083e-39	1.09997e-38	-4.48598	9.41658e-43	1.04802e-41	-4.69347	5.28232e-43	5.79657e-42	-4.40826	6.81121e-129	1.09181e-127
ENSG00000223552	RP11-24F11.2	-4.32963	1.32232e-58	1.97159e-57	-3.94974	3.18471e-47	2.56268e-46	-4.07647	1.97591e-46	1.52802e-45	-4.02574	2.06404e-38	2.00706e-37	-3.97858	2.20991e-40	1.98329e-39	-4.17005	3.78027e-44	4.62361e-43	-4.28742	2.43164e-125	3.56523e-124
ENSG00000223773	CD99P1	-2.19398	1.34335e-49	1.13273e-48	-2.19398	1.57707e-51	1.65088e-50	-2.19353	1.17222e-47	9.87834e-47	-2.19398	2.535e-37	2.22404e-36	-2.19398	2.87109e-39	2.35196e-38	-2.19398	5.68739e-38	4.08854e-37	-2.19396	7.58132e-122	1.00774e-120
ENSG00000223865	HLA-DPB1	-3.9808	7.76206e-51	7.03328e-50	-4.73785	2.80498e-45	2.00518e-44	-4.90004	8.57615e-51	8.87862e-50	-4.61675	9.67304e-37	8.12236e-36	-4.54451	1.19545e-35	7.38764e-35	-4.5117	1.49054e-36	9.57669e-36	-4.91624	5.66246e-94	3.92831e-93
ENSG00000224101	ELMO1-AS1	-3.45247	1.18443e-66	3.16673e-65	-3.32651	2.81089e-64	6.77016e-63	-2.59794	4.70689e-37	2.08685e-36	-2.61327	3.14374e-28	1.37137e-27	-2.31006	2.72908e-26	9.0477e-26	-2.64089	7.03229e-30	2.85301e-29	-3.39233	6.87368e-148	1.82049e-146
ENSG00000224152	AC009506.1	-2.88288	5.24086e-52	5.11383e-51	-2.97973	1.6448e-53	1.95903e-52	-2.73911	4.90598e-46	3.7005e-45	-2.67707	4.04446e-34	2.69058e-33	-2.62695	4.71651e-37	3.23543e-36	-2.68018	1.06636e-35	6.43746e-35	-3.25441	3.08721e-119	3.83925e-118
ENSG00000224167	RP3-522D1.1	-3.13289	9.01198e-50	7.68172e-49	-3.15809	8.18565e-52	8.70459e-51	-2.8535	1.40933e-39	7.2209e-39	-2.85993	2.00741e-32	1.17363e-31	-2.79225	3.97937e-33	2.05082e-32	-2.95461	4.74798e-34	2.55633e-33	-2.5654	6.95889e-75	3.19905e-74
ENSG00000224228	RP1-15D23.2	-2.77843	1.13884e-48	9.05038e-48	-2.75288	4.26669e-50	4.1064e-49	-2.32316	2.41119e-35	9.78506e-35	-2.40996	2.66849e-28	1.16876e-27	-2.43901	8.63247e-32	4.0436e-31	-2.49927	1.54159e-31	6.93742e-31	-2.63589	2.47213e-108	2.37277e-107
ENSG00000224397	LINC01272	-2.62312	2.35607e-25	5.6932e-25	-2.50388	1.23603e-24	3.03039e-24	-2.5628	4.17984e-23	9.65316e-23	-2.54188	4.13206e-18	9.80808e-18	-2.61719	7.10072e-20	1.67811e-19	-2.59985	4.54264e-19	1.01758e-18	-2.56677	1.45334e-59	4.75559e-59
ENSG00000224407	RP5-956O18.3	-3.66563	3.20177e-62	6.07173e-61	-3.66563	1.28002e-64	3.16411e-63	-3.66563	8.04195e-60	1.61412e-58	-3.66563	5.59199e-47	1.277e-45	-3.66563	2.15136e-49	4.4775e-48	-3.66563	8.75312e-48	1.50983e-46	-3.66563	4.58166e-152	1.33104e-150
ENSG00000224411	HSP90AA2P	-2.43782	3.81526e-25	9.12885e-25	-2.18946	4.50166e-27	1.21907e-26	-3.04836	5.7439e-37	2.5299e-36	-3.07379	2.41431e-33	1.51661e-32	-3.13991	5.78736e-36	3.6436e-35	-3.05638	9.23645e-34	4.88703e-33	-2.58793	1.02646e-77	4.99237e-77
ENSG00000224645	RP11-126K1.8	-3.64661	4.37241e-71	1.68326e-69	-3.64661	8.24016e-74	3.62825e-72	-3.64661	2.32994e-68	1.04219e-66	-3.64661	8.96966e-54	4.24102e-52	-3.64661	1.62512e-56	7.15562e-55	-3.64661	1.09231e-54	4.09328e-53	-3.64661	3.19466e-173	1.58496e-171
ENSG00000224689	ZNF812	-5.08259	4.13202e-47	2.99332e-46	-4.96283	9.41787e-47	7.39263e-46	-4.84991	4.5675e-43	2.84761e-42	-4.75892	3.30587e-32	1.89657e-31	-4.69964	1.83447e-34	1.04225e-33	-4.93867	3.46901e-35	2.01229e-34	-5.09844	2.26088e-115	2.56282e-114
ENSG00000224875	AC083949.1	-3.09373	1.38461e-54	1.58354e-53	-3.05334	7.43584e-56	1.03426e-54	-2.74155	2.66932e-45	1.90723e-44	-2.68224	1.31919e-33	8.44823e-33	-2.6675	1.27199e-36	8.42608e-36	-2.83464	2.19856e-37	1.51777e-36	-3.07279	1.17795e-130	1.96418e-129
ENSG00000224916	APOC4-APOC2	-7.55106	1.22043e-73	5.95012e-72	-7.53168	2.62774e-76	1.33664e-74	-7.49425	4.97947e-70	2.50574e-68	-7.48815	4.10058e-55	2.132e-53	-7.52184	2.49929e-58	1.32387e-56	-7.52259	1.96232e-56	8.94793e-55	-7.53551	1.49719e-178	8.5062e-177
ENSG00000224977	RP11-160H22.3	-3.18982	7.52006e-38	3.24228e-37	-3.2387	7.88906e-40	4.07168e-39	-3.18272	9.06158e-35	3.56343e-34	-3.11013	1.74461e-25	6.37491e-25	-3.15196	9.8635e-29	3.78374e-28	-3.2149	1.77254e-28	6.62469e-28	-3.23561	6.76327e-92	4.48656e-91
ENSG00000224985	RP11-297K8.2	-2.28759	6.01911e-53	6.31022e-52	-2.35067	8.86263e-60	1.59482e-58	-2.24335	1.90657e-45	1.38187e-44	-2.32125	7.40338e-41	9.04714e-40	-2.31198	6.09013e-43	6.84836e-42	-2.31534	9.8302e-41	8.91297e-40	-2.25303	3.84613e-112	4.01125e-111
ENSG00000225022	UBE2D3P1	-2.99114	2.51537e-59	3.94672e-58	-2.80044	2.39236e-59	4.20304e-58	-2.96861	1.37755e-52	1.63106e-51	-2.95697	1.6802e-43	2.66899e-42	-3.01911	3.44553e-47	5.77946e-46	-2.91444	9.92659e-47	1.54719e-45	-3.15997	1.64748e-143	3.8753e-142
ENSG00000225062	CATIP-AS1	-3.0341	2.09689e-56	2.71306e-55	-3.03072	1.66268e-58	2.75289e-57	-2.97592	6.12637e-52	6.91117e-51	-2.98109	1.84699e-41	2.40741e-40	-2.99446	6.82493e-44	8.36202e-43	-2.98517	1.78426e-42	1.86224e-41	-3.03197	1.02139e-137	2.04133e-136
ENSG00000225101	OR52K3P	-3.28009	1.83686e-47	1.36146e-46	-3.23411	1.61193e-48	1.40894e-47	-3.05436	7.41379e-40	3.86318e-39	-3.05386	7.54918e-32	4.22263e-31	-3.11497	8.29126e-35	4.81748e-34	-3.16631	8.78682e-35	4.96616e-34	-3.24695	1.3429e-108	1.29422e-107
ENSG00000225217	HSPA7	-3.68946	4.89684e-38	2.12952e-37	-3.26972	6.56452e-29	1.94234e-28	-3.58849	1.28909e-39	6.62168e-39	-3.43932	2.23834e-26	8.60995e-26	-3.45153	3.43986e-30	1.44982e-29	-3.39166	4.50166e-19	1.00872e-18	-3.47187	4.62728e-64	1.6611e-63
ENSG00000225339	RP11-513I15.6	-4.03878	9.15079e-63	1.80328e-61	-4.08379	5.83671e-66	1.57546e-64	-3.98276	1.02814e-59	2.049e-58	-3.96789	6.96017e-47	1.56161e-45	-3.95382	3.52523e-49	7.19862e-48	-3.99672	6.25115e-48	1.09687e-46	-4.06827	1.92013e-152	5.62466e-151
ENSG00000225370	AC011515.2	-3.1634	1.02439e-52	1.05125e-51	-3.03967	2.51817e-51	2.60698e-50	-3.02293	8.34604e-44	5.42416e-43	-2.95891	1.29124e-33	8.28111e-33	-3.03029	1.46287e-37	1.041e-36	-3.11446	4.17756e-39	3.28837e-38	-3.0453	3.6373e-112	3.8019e-111
ENSG00000225541	AC002480.5	-3.0985	2.03894e-46	1.41312e-45	-3.0954	3.51226e-48	3.0102e-47	-3.0705	4.00576e-44	2.64858e-43	-3.06824	2.06893e-34	1.41168e-33	-3.07095	2.51382e-36	1.627e-35	-3.08191	2.67288e-35	1.56334e-34	-3.09274	7.00615e-114	7.66434e-113
ENSG00000225606	AC005281.2	-3.40907	4.29084e-52	4.21898e-51	-3.38972	8.24878e-54	9.98499e-53	-3.28976	8.96394e-46	6.64048e-45	-3.28287	6.41946e-37	5.45209e-36	-3.28475	2.10916e-38	1.60725e-37	-3.34207	1.0046e-38	7.70541e-38	-3.40452	6.00056e-127	9.18998e-126
ENSG00000225864	HCG4P11	-3.31648	3.62462e-56	4.62599e-55	-3.31286	2.76077e-58	4.51267e-57	-3.30158	1.22635e-53	1.5567e-52	-3.28247	1.11255e-41	1.47746e-40	-3.31182	1.87629e-44	2.4254e-43	-3.30581	6.33005e-43	6.87137e-42	-3.31299	2.57572e-137	5.09003e-136
ENSG00000225889	AC074289.1	-4.33	1.65482e-57	2.29267e-56	-3.66003	1.04478e-41	5.96955e-41	-4.09088	4.56908e-53	5.60299e-52	-3.91799	6.31003e-38	5.89187e-37	-3.81213	2.06803e-41	2.04337e-40	-4.01993	4.78591e-41	4.44519e-40	-3.90033	1.68131e-99	1.31756e-98
ENSG00000226179	LINC00685	-2.3002	1.94619e-51	1.82084e-50	-2.3002	1.95165e-53	2.3147e-52	-2.3002	1.94839e-49	1.84e-48	-2.3002	9.97934e-39	9.98643e-38	-2.3002	9.64986e-41	8.94516e-40	-2.3002	2.12397e-39	1.7062e-38	-2.3002	2.93045e-126	4.39723e-125
ENSG00000226232	RP11-419C5.2	-2.78244	2.13859e-60	3.60008e-59	-2.78489	9.03681e-63	1.98023e-61	-2.75416	4.99801e-57	8.16959e-56	-2.74632	7.7612e-45	1.4056e-43	-2.73986	6.027e-47	9.87446e-46	-2.76381	4.98798e-46	7.37468e-45	-2.77998	3.32272e-147	8.57456e-146
ENSG00000226252	RP1-18D14.7	-2.39191	1.19801e-35	4.65268e-35	-2.19479	3.54274e-33	1.29386e-32	-2.20883	3.98415e-31	1.29886e-30	-2.12771	1.9023e-22	5.75552e-22	-2.13027	4.98952e-24	1.46007e-23	-2.20575	1.84033e-24	5.4441e-24	-2.31485	6.55314e-82	3.47511e-81
ENSG00000226415	TPI1P1	-2.92214	2.18651e-49	1.82188e-48	-2.74094	8.11162e-44	5.26452e-43	-3.2481	6.29667e-51	6.567e-50	-3.34549	2.21172e-40	2.5883e-39	-3.31577	2.01218e-48	3.78022e-47	-3.20059	5.5071e-44	6.62073e-43	-2.92057	3.09507e-66	1.16416e-65
ENSG00000226500	RP11-196G18.1	-2.58393	3.02986e-32	9.94659e-32	-2.58393	1.60487e-33	5.95068e-33	-2.54354	4.35147e-30	1.35767e-29	-2.52181	4.04163e-23	1.26858e-22	-2.54298	1.02096e-24	3.08829e-24	-2.56324	3.00079e-24	8.77566e-24	-2.58158	8.71076e-80	4.41809e-79
ENSG00000226564	FTH1P20	-4.67024	2.91913e-54	3.26174e-53	-3.09057	1.58976e-37	7.23971e-37	-5.19171	3.48116e-55	4.9296e-54	-5.13622	7.91641e-44	1.30918e-42	-5.1158	1.59975e-45	2.27912e-44	-5.29901	2.00887e-47	3.34574e-46	-4.3951	1.17783e-114	1.31399e-113
ENSG00000226608	FTLP3	-5.59249	1.25142e-61	2.2781e-60	-4.52584	9.72375e-52	1.02936e-50	-6.72164	5.0908e-67	2.04357e-65	-6.64508	1.62484e-52	6.71379e-51	-6.60373	8.42529e-58	4.20966e-56	-6.39043	4.03847e-54	1.41547e-52	-5.18504	7.59067e-106	6.83839e-105
ENSG00000226751	AF127936.5	-5.3488	4.81206e-55	5.73135e-54	-5.28111	2.70535e-54	3.37629e-53	-4.42735	3.82036e-45	2.69144e-44	-4.46406	2.73571e-35	2.01812e-34	-4.19189	6.67607e-34	3.64314e-33	-4.70814	8.34379e-39	6.42076e-38	-5.54082	1.25652e-137	2.50061e-136
ENSG00000226937	CEP164P1	-2.71705	1.03134e-74	5.36222e-73	-2.7679	1.52146e-79	9.83367e-78	-2.67234	8.41102e-64	2.39901e-62	-2.68066	9.7263e-54	4.53786e-52	-2.66975	1.84448e-54	6.71544e-53	-2.73555	1.33168e-56	6.27536e-55	-2.757	1.25171e-159	4.26005e-158
ENSG00000227039	ITGB2-AS1	-4.01045	6.26256e-58	8.95173e-57	-3.65085	8.65866e-48	7.21043e-47	-3.76086	3.31783e-51	3.5335e-50	-3.727	2.35572e-39	2.50506e-38	-3.73139	2.06241e-42	2.22166e-41	-3.81528	2.87566e-42	2.94035e-41	-3.76081	5.03408e-118	6.05207e-117
ENSG00000227081	RP11-543P15.1	-2.47142	1.47787e-38	6.61055e-38	-2.35711	9.14359e-38	4.22959e-37	-3.0881	1.87126e-36	8.03843e-36	-3.02494	2.48429e-30	1.25506e-29	-3.03884	3.04119e-31	1.37121e-30	-2.9985	2.11806e-24	6.25125e-24	-2.57168	4.32398e-61	1.4544e-60
ENSG00000227193	RP11-439A17.4	-2.06842	4.90757e-29	1.39467e-28	-2.25133	6.25089e-34	2.36507e-33	-2.13818	1.57587e-28	4.60952e-28	-2.12706	9.9155e-22	2.86996e-21	-2.1209	1.50631e-22	4.07212e-22	-2.1384	4.36876e-23	1.20179e-22	-2.19745	1.14471e-70	4.7592e-70
ENSG00000227198	C6orf47-AS1	-3.37448	2.05238e-71	8.05516e-70	-3.37448	3.76175e-74	1.688e-72	-3.37448	1.12451e-68	5.17496e-67	-3.37448	5.02192e-54	2.42325e-52	-3.37448	8.84883e-57	4.04805e-55	-3.37448	6.05913e-55	2.35067e-53	-3.37448	5.26224e-174	2.64804e-172
ENSG00000227278	RP11-656D10.5	-2.4401	4.4841e-56	5.67154e-55	-2.45523	8.20302e-59	1.38919e-57	-2.42389	1.00379e-51	1.10495e-50	-2.39839	2.67987e-40	3.11546e-39	-2.38569	2.67362e-41	2.61249e-40	-2.44679	9.16733e-43	9.80028e-42	-2.45564	2.83257e-137	5.57415e-136
ENSG00000227502	LINC01268	-4.29275	3.2004e-50	2.80084e-49	-4.41375	2.60626e-51	2.69619e-50	-4.04478	5.31415e-46	3.99981e-45	-4.17469	1.12633e-36	9.39051e-36	-3.88684	8.68426e-35	5.03751e-34	-4.36578	6.42435e-40	5.41058e-39	-4.67163	4.43915e-129	7.14829e-128
ENSG00000227694	AC005884.1	-2.22024	9.61051e-60	1.54404e-58	-2.21717	7.62911e-62	1.57155e-60	-2.11649	6.88827e-49	6.25762e-48	-2.13721	2.21543e-38	2.14392e-37	-2.12774	1.17696e-41	1.18877e-40	-2.16387	3.02405e-43	3.37897e-42	-2.21829	2.96819e-144	7.11256e-143
ENSG00000227751	RP1-20B21.4	-3.13621	4.30204e-48	3.32141e-47	-3.13621	5.74723e-50	5.49752e-49	-3.13621	3.23264e-46	2.46471e-45	-3.13621	3.57625e-36	2.83564e-35	-3.13621	4.6111e-38	3.42852e-37	-3.13621	8.37794e-37	5.49303e-36	-3.13621	3.11797e-118	3.76454e-117
ENSG00000227766	HCG4P5	-7.01771	1.80792e-78	1.30634e-76	-7.02148	1.68133e-81	1.20254e-79	-6.97066	2.13901e-74	1.51451e-72	-6.9738	5.89086e-59	4.53564e-57	-6.98099	7.05364e-62	5.17635e-60	-6.99163	3.89228e-60	2.76981e-58	-7.02372	6.25762e-191	4.8445e-189
ENSG00000228058	RP11-552D4.1	-5.81004	7.1949e-45	4.56444e-44	-4.8253	3.05244e-36	1.30925e-35	-5.22916	8.63626e-39	4.24433e-38	-5.10216	1.78471e-28	7.90275e-28	-5.02115	3.64726e-29	1.43627e-28	-4.90582	8.21952e-28	2.95441e-27	-5.20463	7.68217e-65	2.80982e-64
ENSG00000228078	HLA-U	-2.82653	5.51019e-25	1.31058e-24	-3.05386	3.49242e-29	1.04989e-28	-2.89807	1.69428e-24	4.11663e-24	-2.82704	7.31788e-18	1.71334e-17	-2.76241	9.64316e-19	2.15944e-18	-2.78499	1.04316e-18	2.29694e-18	-2.44868	1.74872e-37	3.71636e-37
ENSG00000228106	RP11-452F19.3	-3.56803	6.22719e-54	6.85494e-53	-3.54125	1.86316e-54	2.34812e-53	-2.94792	3.0531e-42	1.81282e-41	-3.13485	1.7098e-34	1.17632e-33	-2.80961	2.15387e-33	1.12902e-32	-3.26192	3.70841e-39	2.92562e-38	-3.71168	1.64187e-119	2.0527e-118
ENSG00000228144	RP11-745O10.4	-8.03491	1.12995e-116	1.5921e-112	-8.03491	4.54099e-121	6.39826e-117	-8.03491	2.82405e-112	3.97908e-108	-8.03491	8.93028e-89	1.20311e-84	-8.03491	3.44531e-93	4.78726e-89	-8.03491	3.01419e-90	4.10283e-86	-8.03491	9.68749e-282	1.36497e-277
ENSG00000228170	RP1-40E16.11	-3.00202	1.42675e-62	2.78048e-61	-3.00202	5.53624e-65	1.39296e-63	-3.00202	3.69213e-60	7.61671e-59	-3.00202	3.01059e-47	7.11731e-46	-3.00202	1.12414e-49	2.40716e-48	-3.00202	4.66575e-48	8.29166e-47	-3.00202	6.64416e-153	1.97502e-151
ENSG00000228192	RP11-342M1.3	-2.60987	7.63644e-55	8.95154e-54	-2.50503	2.30656e-54	2.88884e-53	-2.28027	6.87882e-44	4.49965e-43	-2.25459	3.53764e-32	2.02459e-31	-2.21397	1.88817e-34	1.0706e-33	-2.34034	6.62976e-37	4.38766e-36	-2.47868	1.42587e-120	1.84485e-119
ENSG00000228221	LINC00578	-3.16597	5.07086e-37	2.09158e-36	-3.0221	1.4481e-36	6.31499e-36	-2.77407	4.4527e-30	1.38864e-29	-2.82026	3.14062e-24	1.0541e-23	-2.83479	1.15266e-25	3.69196e-25	-2.90356	2.63375e-25	8.16214e-25	-3.05799	2.11624e-86	1.23931e-85
ENSG00000228275	ARMCX3-AS1	-3.10236	1.20345e-68	3.79342e-67	-3.10236	2.78883e-71	1.0423e-69	-3.10236	5.2151e-66	1.89873e-64	-3.10236	6.66146e-52	2.60722e-50	-3.10236	1.48442e-54	5.46097e-53	-3.10236	8.69168e-53	2.6623e-51	-3.10236	2.10598e-167	8.85769e-166
ENSG00000228315	GUSBP11	-2.82402	2.0819e-57	2.86744e-56	-2.8374	8.20449e-60	1.47828e-58	-2.82542	3.58443e-55	5.07075e-54	-2.82453	2.80784e-43	4.32377e-42	-2.8252	1.6632e-45	2.36473e-44	-2.82692	4.62801e-44	5.59731e-43	-2.83769	6.3889e-141	1.38067e-139
ENSG00000228318	AP001610.5	-4.25113	2.73738e-54	3.06352e-53	-4.15006	5.15674e-53	5.941e-52	-3.71045	8.66034e-42	5.00921e-41	-3.83292	1.76702e-34	1.21332e-33	-3.65963	5.18045e-35	3.06434e-34	-3.98412	5.40226e-38	3.89151e-37	-4.12259	2.30036e-120	2.95731e-119
ENSG00000228347	FTLP17	-2.22676	1.47321e-45	9.72247e-45	-2.19512	2.0739e-46	1.58811e-45	-2.2091	7.56384e-41	4.18431e-40	-2.20225	4.26191e-33	2.62228e-32	-2.24608	2.42878e-36	1.57341e-35	-2.25042	2.87648e-35	1.67755e-34	-2.22983	2.57376e-110	2.56284e-109
ENSG00000228427	RP5-1091N2.9	-2.90063	5.70611e-48	4.37189e-47	-2.37715	2.57182e-39	1.28865e-38	-2.51569	2.04809e-36	8.77665e-36	-2.52677	1.71162e-27	7.10149e-27	-2.49884	2.55035e-32	1.2434e-31	-2.48873	4.76804e-32	2.2143e-31	-2.37825	2.88451e-74	1.30979e-73
ENSG00000228589	SPCS2P4	-2.7963	1.2808e-45	8.50367e-45	-2.35505	1.36587e-40	7.34267e-40	-4.10069	1.7414e-78	1.68057e-76	-4.08941	3.23554e-62	3.27977e-60	-4.11352	6.59856e-69	9.20531e-67	-4.02563	1.73832e-64	1.85552e-62	-3.06504	6.7916e-89	4.18059e-88
ENSG00000228601	RPL39P	-3.71195	1.97439e-45	1.29331e-44	-3.71195	3.31647e-47	2.66719e-46	-3.71195	1.17983e-43	7.5977e-43	-3.71195	3.83826e-34	2.55824e-33	-3.71195	6.22776e-36	3.91388e-35	-3.71195	9.70796e-35	5.47359e-34	-3.71195	7.8163e-112	8.09197e-111
ENSG00000228651	RP11-556E13.1	-5.15527	1.14659e-82	1.12976e-80	-5.0176	9.8927e-80	6.45315e-78	-4.77373	1.33817e-65	4.64403e-64	-4.73524	1.34248e-45	2.63081e-44	-4.5193	2.61345e-50	5.93928e-49	-4.89681	2.25892e-55	9.1989e-54	-5.09372	6.90817e-181	4.21368e-179
ENSG00000228703	RP5-1160K1.6	-4.38821	5.05775e-65	1.16826e-63	-4.38821	1.59382e-67	4.6883e-66	-4.38821	1.61171e-62	4.09909e-61	-4.38821	3.99147e-49	1.14775e-47	-4.38821	1.20999e-51	3.16302e-50	-4.38821	5.77065e-50	1.25283e-48	-4.38821	9.35109e-159	3.12962e-157
ENSG00000228789	HCG22	-3.01239	8.41172e-22	1.7764e-21	-3.14276	1.93756e-23	4.53418e-23	-3.10912	2.2542e-21	4.8789e-21	-3.01926	7.87582e-16	1.66672e-15	-2.96945	2.54772e-16	5.10485e-16	-2.98464	3.35195e-16	6.61562e-16	-3.25141	2.17019e-57	6.78756e-57
ENSG00000228830	RP4-781K5.2	-3.81774	3.35441e-48	2.59833e-47	-3.81774	4.43987e-50	4.27015e-49	-3.81774	2.54409e-46	1.95347e-45	-3.81774	2.95764e-36	2.36108e-35	-3.81774	3.77813e-38	2.82558e-37	-3.81774	6.90726e-37	4.56274e-36	-3.81774	1.71516e-118	2.09279e-117
ENSG00000228938	SNRPD2P1	-2.60402	3.58032e-31	1.11682e-30	-2.57022	7.02614e-32	2.39996e-31	-2.24634	1.15561e-22	2.62367e-22	-2.23291	1.24583e-17	2.87812e-17	-2.17863	1.3911e-17	2.94435e-17	-2.36767	3.11771e-20	7.3904e-20	-2.56183	6.03659e-73	2.63411e-72
ENSG00000229044	RP11-266K22.2	-3.29641	4.29664e-70	1.52878e-68	-3.23649	4.6231e-72	1.79448e-70	-2.46951	1.1742e-39	6.03815e-39	-2.54659	4.38977e-30	2.18326e-29	-2.42479	8.94796e-29	3.44378e-28	-2.807	1.39414e-41	1.35192e-40	-3.14502	9.34112e-120	1.17725e-118
ENSG00000229047	AF127577.10	-3.37878	1.78161e-49	1.48979e-48	-3.37878	2.11369e-51	2.19307e-50	-3.37878	1.50754e-47	1.25911e-46	-3.37878	3.14502e-37	2.74726e-36	-3.37878	3.59977e-39	2.93523e-38	-3.37878	7.08086e-38	5.06443e-37	-3.37878	1.4902e-121	1.96785e-120
ENSG00000229111	MED4-AS1	-4.302	1.27826e-80	1.07848e-78	-4.37747	7.15069e-87	7.35425e-85	-3.73765	8.25759e-57	1.31766e-55	-3.84981	1.17891e-47	2.97152e-46	-3.73632	2.57282e-47	4.37287e-46	-4.05146	9.35522e-52	2.48496e-50	-4.14529	1.17246e-135	2.22341e-134
ENSG00000229132	EIF4A1P10	-2.39449	8.79029e-62	1.61902e-60	-2.2067	2.59015e-57	3.9842e-56	-2.08405	5.42173e-44	3.56307e-43	-2.12793	3.36182e-37	2.92757e-36	-2.03322	5.77446e-35	3.4e-34	-2.28786	1.97357e-41	1.89038e-40	-2.35399	1.27942e-121	1.69109e-120
ENSG00000229191	RP11-168O16.1	-2.70382	1.93558e-34	7.08555e-34	-2.53005	1.83041e-33	6.76737e-33	-2.56667	6.90393e-31	2.22143e-30	-2.51076	1.82528e-23	5.83974e-23	-2.53563	2.25524e-25	7.12475e-25	-2.58607	4.15467e-25	1.27287e-24	-2.58364	1.76224e-80	9.07526e-80
ENSG00000229233	AC011891.5	-2.20025	1.31751e-38	5.90451e-38	-2.20025	3.9962e-40	2.09318e-39	-2.20025	4.35887e-37	1.93682e-36	-2.20025	6.01606e-29	2.75573e-28	-2.20025	1.76737e-30	7.58523e-30	-2.20025	1.85472e-29	7.3325e-29	-2.20025	2.26582e-95	1.61484e-94
ENSG00000229273	RP11-104G3.2	-2.45711	1.07803e-43	6.40904e-43	-2.45711	2.1036e-45	1.51377e-44	-2.45711	5.54499e-42	3.24052e-41	-2.45711	8.09605e-33	4.88955e-32	-2.45711	1.52694e-34	8.72448e-34	-2.45711	2.15307e-33	1.11042e-32	-2.45711	1.18948e-107	1.12331e-106
ENSG00000229391	HLA-DRB6	-6.92182	7.81513e-66	1.96634e-64	-6.70678	4.63128e-60	8.43084e-59	-6.38791	8.98832e-52	9.94859e-51	-6.37906	4.40666e-40	5.02345e-39	-6.34336	3.87913e-39	3.14482e-38	-6.44665	4.25e-42	4.29881e-41	-6.89632	2.13041e-146	5.33169e-145
ENSG00000229644	NAMPTP1	-2.7943	1.59879e-24	3.74078e-24	-2.72091	1.30679e-24	3.20165e-24	-2.44125	1.30476e-18	2.53223e-18	-2.52448	6.02732e-16	1.28227e-15	-2.51073	2.0668e-16	4.15839e-16	-2.50951	1.83889e-15	3.51942e-15	-2.87804	4.78521e-62	1.64287e-61
ENSG00000229671	LINC01150	-3.50216	9.71091e-55	1.1243e-53	-3.17004	1.12162e-47	9.25813e-47	-3.37002	3.59249e-45	2.53853e-44	-3.29105	8.80262e-34	5.72353e-33	-3.37892	1.22935e-39	1.03659e-38	-3.3914	8.07036e-39	6.22054e-38	-3.32789	5.54738e-106	5.00401e-105
ENSG00000229927	RHEBP1	-2.18844	2.33709e-57	3.20952e-56	-2.13805	3.12816e-57	4.80128e-56	-2.21758	3.49859e-56	5.31198e-55	-2.21758	4.37273e-44	7.40526e-43	-2.21758	2.32146e-46	3.59839e-45	-2.21758	7.62038e-45	1.01967e-43	-2.21325	3.99596e-142	9.05195e-141
ENSG00000229932	YWHAZP3	-2.31923	2.40595e-45	1.56798e-44	-2.18785	1.45968e-39	7.42219e-39	-2.18001	4.96343e-43	3.0849e-42	-2.29829	1.21531e-35	9.24609e-35	-2.26718	8.59064e-37	5.7694e-36	-2.33719	1.48276e-38	1.11902e-37	-2.51072	1.44808e-106	1.32663e-105
ENSG00000229944	EIF4EP2	-3.51253	2.73651e-53	2.9122e-52	-3.49441	2.23783e-58	3.67922e-57	-3.47143	5.84692e-52	6.62776e-51	-3.5059	9.06419e-42	1.21082e-40	-3.61163	2.71373e-46	4.15614e-45	-3.67098	3.50826e-45	4.85573e-44	-3.68573	4.7812e-130	7.86081e-129
ENSG00000230043	TMSB4XP6	-6.77715	1.81677e-90	3.45923e-88	-6.77715	6.65395e-94	1.23361e-91	-6.77715	4.98202e-87	1.0323e-84	-6.77715	1.19818e-68	2.3778e-66	-6.77715	4.21455e-72	8.3638e-70	-6.77715	8.44866e-70	1.60867e-67	-6.77715	2.16985e-219	4.3676e-217
ENSG00000230113	AC091177.1	-5.84458	2.41928e-73	1.12873e-71	-5.7504	7.87149e-74	3.47678e-72	-5.76775	7.73353e-68	3.37354e-66	-5.75903	1.67176e-53	7.64777e-52	-5.70245	4.04662e-56	1.72779e-54	-5.80556	8.42625e-55	3.22625e-53	-5.74504	3.08799e-164	1.2086e-162
ENSG00000230138	RP11-117D22.2	-2.34901	3.37359e-30	1.00814e-29	-2.24118	3.75373e-29	1.12628e-28	-2.26387	2.52048e-27	6.95799e-27	-2.24956	5.05222e-21	1.40711e-20	-2.26448	1.48465e-22	4.01587e-22	-2.24222	2.13222e-21	5.35429e-21	-2.19237	4.98865e-64	1.78992e-63
ENSG00000230204	FTH1P5	-2.94961	2.50717e-47	1.84181e-46	-2.65877	2.42447e-43	1.53187e-42	-2.9772	6.18351e-45	4.31315e-44	-2.97439	1.26246e-35	9.58408e-35	-3.01965	1.88819e-38	1.44433e-37	-3.01009	5.28469e-37	3.52396e-36	-2.84122	1.26546e-103	1.08788e-102
ENSG00000230212	AP000688.14	-2.08509	8.60944e-30	2.52986e-29	-2.34482	1.93799e-34	7.54733e-34	-2.19577	8.97757e-30	2.76671e-29	-2.18425	5.29975e-22	1.56253e-21	-2.18448	6.36367e-24	1.85256e-23	-2.30568	2.66153e-25	8.24379e-25	-2.34741	4.90017e-78	2.39568e-77
ENSG00000230409	TCEA1P2	-2.94967	1.77348e-63	3.65327e-62	-2.94837	1.79915e-64	4.40871e-63	-2.7513	8.94114e-49	8.07051e-48	-2.82845	4.40708e-41	5.52453e-40	-2.75347	7.4841e-41	6.99741e-40	-2.96795	1.65877e-47	2.77578e-46	-2.28374	5.32721e-83	2.89585e-82
ENSG00000230445	LRRC37A6P	-2.6593	1.01932e-43	6.06256e-43	-2.52848	6.36774e-41	3.48975e-40	-2.33316	2.1784e-36	9.32369e-36	-2.21271	2.50604e-27	1.02706e-26	-2.10871	4.69856e-28	1.72583e-27	-2.23318	3.71489e-28	1.36239e-27	-2.86482	1.62206e-115	1.84461e-114
ENSG00000230521	HCG4P7	-2.36221	4.92714e-34	1.76336e-33	-2.49248	1.22866e-38	5.91856e-38	-2.28711	7.37208e-30	2.28041e-29	-2.12874	4.35509e-21	1.21849e-20	-2.22615	6.74496e-24	1.96154e-23	-2.21705	3.11348e-23	8.62543e-23	-2.68747	6.1561e-91	4.00459e-90
ENSG00000230532	AC091133.1	-3.6272	3.62798e-73	1.66509e-71	-3.6272	5.73259e-76	2.86426e-74	-3.6272	2.30582e-70	1.19445e-68	-3.6272	2.27317e-55	1.22248e-53	-3.6272	3.45255e-58	1.78847e-56	-3.6272	2.61017e-56	1.17125e-54	-3.6272	3.4881e-178	1.94258e-176
ENSG00000230795	HLA-K	-2.40492	3.80938e-29	1.09094e-28	-2.36781	9.85453e-27	2.62825e-26	-2.28234	5.4554e-25	1.35376e-24	-2.12398	1.80827e-20	4.88188e-20	-2.12183	4.66879e-22	1.22593e-21	-2.16384	7.00278e-23	1.90444e-22	-2.44015	2.99298e-40	6.67581e-40
ENSG00000230806	SRGAP2-AS1	-2.53909	6.04677e-43	3.43268e-42	-2.91034	1.40785e-52	1.57184e-51	-2.60121	4.28119e-43	2.67148e-42	-2.59685	3.39731e-33	2.10594e-32	-2.54718	6.72255e-35	3.93358e-34	-2.66441	1.68169e-34	9.33976e-34	-2.28198	3.15714e-80	1.61643e-79
ENSG00000230955	RP11-109P14.10	-2.53996	4.41252e-51	4.05032e-50	-2.53996	4.56168e-53	5.29441e-52	-2.53996	4.28501e-49	3.95647e-48	-2.53996	1.86528e-38	1.82133e-37	-2.53996	1.85962e-40	1.67962e-39	-2.53996	4.01062e-39	3.15873e-38	-2.53996	2.08696e-125	3.06305e-124
ENSG00000231131	LINC01468	-2.25904	5.66175e-51	5.15669e-50	-2.22407	6.53555e-52	7.00806e-51	-2.08262	1.04973e-38	5.13032e-38	-2.09018	2.79109e-32	1.61638e-31	-2.06481	4.60863e-34	2.53952e-33	-2.16893	2.1697e-36	1.37894e-35	-2.25114	1.30933e-123	1.81759e-122
ENSG00000231389	HLA-DPA1	-5.96277	1.65194e-54	1.8786e-53	-5.81395	3.54464e-40	1.86011e-39	-5.77612	3.49408e-50	3.49656e-49	-5.57317	1.16733e-39	1.27501e-38	-5.2754	1.6645e-39	1.38774e-38	-5.3059	1.59865e-40	1.42383e-39	-6.56809	5.99786e-111	6.07111e-110
ENSG00000231429	RP11-343N15.2	-2.05432	1.22795e-25	3.00223e-25	-2.93225	9.78819e-45	6.73087e-44	-2.27129	3.50394e-29	1.05425e-28	-2.36527	3.44172e-23	1.08658e-22	-2.27598	2.43341e-24	7.24419e-24	-2.50298	2.45943e-26	8.07958e-26	-2.54615	1.30569e-74	5.97504e-74
ENSG00000231507	LINC01353	-2.73964	1.55096e-31	4.91854e-31	-2.51672	6.55792e-30	2.03931e-29	-2.61264	3.98092e-27	1.08662e-26	-2.53117	5.3932e-20	1.41799e-19	-2.67648	4.98734e-24	1.45973e-23	-2.70103	1.65935e-23	4.65465e-23	-2.40156	2.19697e-61	7.41979e-61
ENSG00000231684	EIF1P3	-2.31633	7.93627e-51	7.18651e-50	-2.13426	2.2611e-49	2.0755e-48	-2.47901	7.20677e-52	8.0654e-51	-2.46133	5.70752e-39	5.85291e-38	-2.51085	1.62314e-44	2.12349e-43	-2.51296	2.70586e-43	3.03306e-42	-2.54541	9.67135e-139	1.98066e-137
ENSG00000232024	LSM12P1	-2.45071	3.45114e-60	5.71405e-59	-2.45912	2.2128e-60	4.15711e-59	-2.52436	2.35627e-52	2.73474e-51	-2.50805	7.01897e-45	1.27609e-43	-2.48901	8.19362e-45	1.10055e-43	-2.56078	3.63699e-47	5.87675e-46	-2.21218	1.67182e-89	1.04833e-88
ENSG00000232133	IMPDH1P10	-2.75767	4.76262e-44	2.89247e-43	-2.75447	1.13148e-45	8.29478e-45	-2.63352	7.56821e-40	3.93636e-39	-2.65098	2.94738e-31	1.58084e-30	-2.59386	1.49353e-32	7.40718e-32	-2.70483	6.36223e-33	3.16093e-32	-2.73702	1.88521e-106	1.71593e-105
ENSG00000232187	FTH1P7	-4.10763	1.54591e-52	1.55919e-51	-3.26442	2.23642e-43	1.41942e-42	-4.70348	1.96752e-57	3.31607e-56	-4.65644	1.21621e-44	2.16368e-43	-4.72876	1.74246e-48	3.29547e-47	-4.71988	9.55659e-47	1.49282e-45	-3.54391	3.83167e-97	2.84299e-96
ENSG00000232220	AC008440.5	-4.33829	5.22241e-57	7.04826e-56	-4.33829	3.25375e-59	5.65992e-58	-4.33829	8.41622e-55	1.16717e-53	-4.33829	5.47698e-43	8.30685e-42	-4.33829	3.28655e-45	4.5849e-44	-4.33829	9.94258e-44	1.16162e-42	-4.33829	1.32589e-139	2.78004e-138
ENSG00000232229	LINC00865	-3.05195	7.15283e-39	3.24793e-38	-2.49951	7.23698e-31	2.34898e-30	-2.47447	3.40885e-28	9.8042e-28	-2.4957	8.12959e-23	2.50867e-22	-2.55843	8.37162e-25	2.54325e-24	-2.6136	3.77999e-25	1.15934e-24	-2.64909	2.55009e-73	1.12108e-72
ENSG00000232310	RP11-557H15.4	-3.45094	2.64892e-52	2.63769e-51	-2.49754	9.53464e-26	2.44839e-25	-2.55611	1.65502e-32	5.77639e-32	-2.46273	3.94043e-27	1.59313e-26	-2.25297	1.68877e-22	4.55402e-22	-2.61934	2.98579e-28	1.1013e-27	-2.98925	1.18394e-89	7.45717e-89
ENSG00000232368	FTLP2	-3.83619	1.76856e-58	2.61754e-57	-3.35416	5.06223e-51	5.13142e-50	-3.98572	1.6641e-52	1.95556e-51	-4.03224	3.2378e-46	6.7989e-45	-4.08157	6.66503e-50	1.45147e-48	-4.07512	3.17648e-48	5.77505e-47	-4.00388	6.36615e-146	1.57643e-144
ENSG00000232472	EEF1B2P3	-2.57216	2.38539e-49	1.98136e-48	-2.24856	2.41869e-43	1.52891e-42	-2.77332	6.70819e-49	6.10584e-48	-2.83311	4.36979e-42	6.00686e-41	-2.72849	6.27278e-40	5.42562e-39	-3.05853	6.14567e-47	9.66434e-46	-2.7855	3.16316e-107	2.94963e-106
ENSG00000232498	RP5-1011O1.2	-2.31307	3.02842e-27	7.92543e-27	-2.31896	1.98211e-28	5.72412e-28	-2.14846	2.16082e-22	4.85194e-22	-2.18606	6.64621e-18	1.55893e-17	-2.17271	2.36427e-19	5.46197e-19	-2.28529	2.60682e-20	6.19707e-20	-2.27974	7.89475e-65	2.88328e-64
ENSG00000232573	RPL3P4	-2.13374	8.17269e-29	2.29618e-28	-2.27296	7.46157e-36	3.13644e-35	-3.46091	2.15599e-29	6.54555e-29	-3.62328	2.15746e-24	7.33379e-24	-3.36174	1.40278e-26	4.71947e-26	-3.59229	1.04082e-27	3.72305e-27	-2.04087	7.16618e-51	1.96941e-50
ENSG00000232581	AC079742.4	-3.82267	5.67755e-75	3.01874e-73	-3.82267	7.69994e-78	4.39239e-76	-3.82267	4.20424e-72	2.48898e-70	-3.82267	9.36679e-57	5.73817e-55	-3.82267	1.2209e-59	7.25845e-58	-3.82267	1.02208e-57	5.5389e-56	-3.82267	1.73348e-182	1.09039e-180
ENSG00000232591	RP5-1031D4.2	-6.80771	5.26689e-65	1.21259e-63	-6.70994	1.13623e-65	3.02067e-64	-6.37317	1.65597e-53	2.09074e-52	-6.41499	1.51548e-43	2.41824e-42	-6.27333	8.2906e-44	1.00789e-42	-6.5859	2.55803e-47	4.21552e-46	-6.72826	1.16141e-152	3.42349e-151
ENSG00000232628	RP11-365O16.3	-2.57708	1.92347e-32	6.37837e-32	-2.74982	3.04905e-35	1.24129e-34	-2.55761	3.61687e-27	9.89931e-27	-2.49958	5.44459e-20	1.43124e-19	-2.51053	6.892e-23	1.89591e-22	-2.66462	9.22669e-24	2.62528e-23	-2.00978	9.83105e-43	2.29565e-42
ENSG00000232629	HLA-DQB2	-3.55335	5.17168e-44	3.13415e-43	-3.37097	3.51446e-40	1.84565e-39	-3.16275	4.64999e-33	1.66375e-32	-3.1319	1.54876e-27	6.45049e-27	-3.22516	1.54605e-30	6.66171e-30	-3.09339	6.57182e-27	2.23071e-26	-3.53119	3.18046e-105	2.82551e-104
ENSG00000232656	IDI2-AS1	-2.88958	2.42254e-47	1.78243e-46	-3.2125	4.80014e-55	6.32094e-54	-3.03957	8.74722e-47	6.94357e-46	-2.96917	6.71252e-36	5.19382e-35	-2.94615	2.37527e-38	1.80418e-37	-3.00953	2.11878e-36	1.3484e-35	-3.36878	1.93501e-120	2.49444e-119
ENSG00000232759	AC002480.3	-3.21739	2.32336e-43	1.35273e-42	-3.08827	4.80105e-43	2.9761e-42	-2.96022	7.88887e-38	3.64321e-37	-2.95239	3.14719e-29	1.46446e-28	-2.91472	1.42309e-30	6.14506e-30	-3.04104	2.92273e-31	1.29176e-30	-3.14332	8.34848e-102	6.90318e-101
ENSG00000232801	SDCBPP3	-2.08614	3.07082e-35	1.16972e-34	-2.02876	1.79376e-35	7.38145e-35	-2.10881	1.73664e-33	6.3573e-33	-2.10703	3.06602e-26	1.17201e-25	-2.13536	1.96679e-28	7.40965e-28	-2.14038	1.60388e-27	5.6752e-27	-2.15292	1.05483e-89	6.6738e-89
ENSG00000232807	RP11-536K7.3	-2.68379	3.00981e-57	4.10061e-56	-2.69754	1.12641e-59	2.00392e-58	-2.57283	3.15311e-51	3.36062e-50	-2.55757	1.19115e-38	1.18192e-37	-2.50502	4.32696e-41	4.13615e-40	-2.59899	5.15553e-40	4.38921e-39	-2.62866	1.09204e-128	1.74257e-127
ENSG00000232810	TNF	-6.88998	2.29603e-70	8.38111e-69	-6.81032	4.43149e-72	1.73444e-70	-6.7707	1.25441e-64	3.95405e-63	-6.74651	1.15826e-51	4.3636e-50	-6.82033	4.9744e-55	1.9046e-53	-6.81379	1.86368e-53	5.98161e-52	-6.84255	5.29377e-166	2.15576e-164
ENSG00000232940	HCG25	-2.50145	6.28706e-51	5.71146e-50	-2.88756	3.85548e-61	7.57652e-60	-2.65984	7.79542e-48	6.64875e-47	-2.64162	2.09558e-38	2.03492e-37	-2.57491	6.30498e-39	5.01622e-38	-2.78274	9.71856e-43	1.0366e-41	-2.61926	4.43302e-112	4.61309e-111
ENSG00000233030	RP11-196G18.3	-2.2714	6.47896e-43	3.67063e-42	-2.27303	5.8926e-44	3.87071e-43	-2.16994	4.06175e-37	1.8065e-36	-2.16768	3.71447e-29	1.72048e-28	-2.06048	5.41101e-28	1.97875e-27	-2.27249	3.83125e-32	1.78927e-31	-2.34039	4.16474e-106	3.76403e-105
ENSG00000233144	RP11-537A6.9	-3.73416	8.54769e-67	2.33405e-65	-3.74856	1.14588e-71	4.37544e-70	-2.94601	9.06842e-42	5.23879e-41	-3.1348	1.79996e-33	1.14447e-32	-2.82271	1.00947e-31	4.70661e-31	-3.45676	7.42929e-44	8.78914e-43	-3.05037	4.20842e-94	2.92967e-93
ENSG00000233276	GPX1	-4.9275	8.64198e-61	1.48676e-59	-3.98104	1.16416e-54	1.48712e-53	-4.6728	1.76736e-58	3.24669e-57	-4.50642	1.35038e-45	2.64262e-44	-4.63885	7.62578e-49	1.49025e-47	-4.28742	5.1952e-47	8.21553e-46	-3.32415	3.07972e-82	1.6412e-81
ENSG00000233328	PFN1P1	-2.95307	1.06115e-46	7.47583e-46	-2.89883	2.6512e-47	2.14194e-46	-2.97211	6.93628e-36	2.88977e-35	-3.07888	3.25782e-36	2.59044e-35	-3.09438	9.86604e-38	7.10335e-37	-2.97832	2.8271e-35	1.65012e-34	-3.11932	7.22301e-117	8.42485e-116
ENSG00000233448	PMS2P9	-2.07216	5.23156e-38	2.27368e-37	-2.06961	1.94865e-39	9.8587e-39	-2.07331	1.54953e-36	6.67468e-36	-2.07331	1.6378e-28	7.26369e-28	-2.07331	5.05887e-30	2.11011e-29	-2.07331	5.1344e-29	1.97499e-28	-2.06335	7.90815e-93	5.34673e-92
ENSG00000233541	RPL31P47	-2.11836	1.2825e-25	3.13287e-25	-2.17086	6.4172e-28	1.80764e-27	-2.01381	9.35836e-21	1.97513e-20	-2.08704	2.4905e-18	5.99131e-18	-2.11341	8.56472e-20	2.01767e-19	-2.11752	2.44068e-19	5.54218e-19	-2.10877	1.12961e-60	3.7627e-60
ENSG00000233825	RP11-135A24.4	-3.36957	1.06588e-63	2.24823e-62	-3.43718	5.09028e-69	1.63749e-67	-3.01844	1.31538e-44	9.00566e-44	-3.00609	8.28999e-34	5.40018e-33	-2.9803	5.85513e-36	3.68463e-35	-3.07192	3.23139e-38	2.3689e-37	-3.42649	4.06124e-142	9.18426e-141
ENSG00000233830	EIF4HP1	-2.60777	6.97157e-44	4.19426e-43	-2.64498	1.33761e-50	1.31982e-49	-2.79203	2.57658e-50	2.59871e-49	-2.86408	3.08584e-42	4.29894e-41	-3.04511	7.33469e-49	1.43735e-47	-2.91428	1.31011e-46	2.02407e-45	-2.99852	9.65034e-105	8.47186e-104
ENSG00000233846	RP11-307L3.2	-3.7557	1.21254e-82	1.18281e-80	-3.69077	6.34554e-83	4.85917e-81	-3.81468	6.69357e-70	3.35631e-68	-3.84002	1.43035e-61	1.3526e-59	-3.85176	3.57063e-66	3.90001e-64	-3.8462	2.81202e-66	3.66864e-64	-3.88541	7.76899e-198	7.34665e-196
ENSG00000233849	AC022201.5	-2.25343	4.64842e-58	6.70382e-57	-2.25343	2.6481e-60	4.9224e-59	-2.25343	8.19302e-56	1.21643e-54	-2.25343	8.59999e-44	1.409e-42	-2.25343	4.71772e-46	7.10937e-45	-2.25343	1.51518e-44	1.93905e-43	-2.25343	4.06741e-142	9.18426e-141
ENSG00000233870	AC007881.4	-2.7642	4.43028e-42	2.38163e-41	-3.11286	8.15575e-55	1.05717e-53	-2.90081	4.70263e-38	2.20279e-37	-2.90414	1.98151e-29	9.35992e-29	-2.81824	3.76332e-31	1.68495e-30	-2.88507	4.3318e-32	2.01502e-31	-3.15545	7.17596e-121	9.35331e-120
ENSG00000233893	EZR-AS1	-2.80805	9.22606e-50	7.85944e-49	-2.68259	9.94737e-47	7.78658e-46	-2.69355	7.40762e-41	4.10595e-40	-2.60516	8.56885e-28	3.63004e-27	-2.58893	2.26158e-31	1.03159e-30	-2.68085	3.98095e-34	2.1582e-33	-2.73996	2.32053e-105	2.06939e-104
ENSG00000233913	CTC-575D19.1	-2.30856	1.28719e-09	1.81728e-09	-2.27639	1.85789e-11	2.84138e-11	-2.8439	6.44291e-11	9.72476e-11	-2.70849	9.65968e-09	1.49484e-08	-2.42441	9.05992e-07	1.24662e-06	-2.38014	1.70418e-06	2.3044e-06	-2.88031	5.72486e-43	1.34237e-42
ENSG00000234222	RP11-315I20.1	-2.39941	8.58524e-62	1.5854e-60	-2.53862	5.92839e-67	1.67397e-65	-2.37782	2.24596e-56	3.47754e-55	-2.36658	4.17583e-41	5.26274e-40	-2.33433	2.60145e-45	3.67647e-44	-2.4989	4.52672e-48	8.06339e-47	-2.22004	1.60893e-106	1.46826e-105
ENSG00000234232	RP11-353N4.5	-2.16448	5.25767e-35	1.9797e-34	-2.01926	4.8204e-32	1.66388e-31	-2.04208	5.47477e-31	1.77007e-30	-2.03227	4.91014e-24	1.62824e-23	-2.02104	5.30458e-25	1.63369e-24	-2.06168	8.21131e-25	2.47587e-24	-2.06676	6.31929e-79	3.15181e-78
ENSG00000234287	RP11-761N21.2	-2.78062	8.54292e-49	6.84697e-48	-2.71626	1.10552e-46	8.61068e-46	-3.45309	4.4468e-55	6.27182e-54	-3.44711	6.40313e-45	1.17017e-43	-3.42935	1.03455e-46	1.66402e-45	-3.44381	4.97765e-47	7.907e-46	-2.40922	2.44057e-62	8.44284e-62
ENSG00000234431	AC007283.5	-2.77509	4.10483e-50	3.56799e-49	-2.77509	4.61084e-52	5.03229e-51	-2.77509	3.66862e-48	3.18686e-47	-2.77509	1.02498e-37	9.35362e-37	-2.77509	1.11058e-39	9.40955e-39	-2.77509	2.26589e-38	1.68566e-37	-2.77509	4.39761e-123	6.00992e-122
ENSG00000234745	HLA-B	-4.08887	1.66563e-50	1.48724e-49	-4.0914	5.72836e-38	2.67881e-37	-4.40985	7.48808e-46	5.57354e-45	-4.03739	2.59653e-33	1.62673e-32	-4.1992	8.74605e-37	5.86539e-36	-3.79734	1.69205e-35	1.0051e-34	-4.05888	2.39933e-65	8.87311e-65
ENSG00000234851	RP11-3P17.3	-4.64332	2.98898e-75	1.61359e-73	-4.42453	2.83736e-73	1.20781e-71	-4.89954	1.1047e-78	1.08092e-76	-4.92029	1.51804e-63	1.7677e-61	-4.87988	1.98223e-64	1.76239e-62	-4.92044	1.4973e-64	1.61045e-62	-4.89997	4.67432e-195	3.99158e-193
ENSG00000234854	LINC00676	-4.91537	1.79915e-38	8.00695e-38	-4.84382	3.40171e-39	1.69006e-38	-4.42531	1.16626e-30	3.7203e-30	-4.51173	2.514e-25	9.113e-25	-4.34053	2.837e-25	8.91268e-25	-4.53012	4.81032e-26	1.55132e-25	-4.72047	7.70616e-86	4.4573e-85
ENSG00000234857	HNRNPUL2-BSCL2	-3.07694	1.77273e-68	5.51387e-67	-3.09407	2.03159e-71	7.65378e-70	-3.10107	3.68178e-66	1.36877e-64	-3.09538	6.68451e-52	2.609e-50	-3.10589	1.02229e-54	3.84107e-53	-3.08867	1.31717e-52	3.9487e-51	-3.11014	4.28534e-168	1.85786e-166
ENSG00000234906	APOC2	-8.03871	1.90946e-75	1.05507e-73	-7.95668	2.83147e-77	1.54036e-75	-7.9812	2.14681e-71	1.22464e-69	-7.95626	4.94532e-56	2.87932e-54	-7.95405	3.84563e-59	2.18488e-57	-7.99114	1.34018e-57	7.12571e-56	-7.96878	6.1254e-180	3.65707e-178
ENSG00000234945	GTF3C2-AS1	-2.08628	2.45219e-44	1.51011e-43	-2.42135	1.6842e-57	2.63378e-56	-2.15461	5.44201e-47	4.3741e-46	-2.12163	2.85395e-34	1.92587e-33	-2.12629	3.23604e-38	2.43048e-37	-2.25992	4.29817e-37	2.88662e-36	-2.15763	1.1411e-102	9.62183e-102
ENSG00000234961	RP11-124N14.3	-2.46812	8.72952e-16	1.48801e-15	-2.46812	2.06008e-16	3.71088e-16	-2.46812	3.70563e-15	6.41351e-15	-2.46812	8.60436e-12	1.51148e-11	-2.46812	1.99938e-12	3.40274e-12	-2.46812	5.28776e-12	8.76319e-12	-2.46812	3.55136e-39	7.77844e-39
ENSG00000234975	FTH1P2	-4.8481	4.65605e-52	4.5685e-51	-3.19	5.21248e-36	2.2095e-35	-5.05549	5.86205e-48	5.03636e-47	-4.90029	1.55761e-36	1.28044e-35	-5.16938	1.17421e-41	1.18684e-40	-5.2863	3.73537e-43	4.13769e-42	-5.20609	2.88332e-118	3.4872e-117
ENSG00000235027	AC068580.6	-2.65225	1.13369e-40	5.66444e-40	-2.94611	1.9979e-42	1.19636e-41	-2.98206	6.49341e-43	4.00579e-42	-2.69043	9.15793e-26	3.40462e-25	-2.84553	6.77087e-32	3.2014e-31	-2.65423	1.77152e-27	6.25112e-27	-3.40186	1.13959e-112	1.21001e-111
ENSG00000235162	C12orf75	-2.95085	2.71467e-34	9.85054e-34	-3.58502	4.26553e-44	2.82697e-43	-3.69837	3.46143e-49	3.22137e-48	-3.71303	2.11679e-38	2.05411e-37	-3.506	1.09423e-33	5.86449e-33	-3.71896	1.1148e-39	9.20182e-39	-4.00553	2.42434e-115	2.74369e-114
ENSG00000235174	RPL39P3	-2.60844	2.38632e-40	1.17852e-39	-2.59951	9.7482e-36	4.06849e-35	-4.09927	2.2118e-45	1.59164e-44	-4.30147	9.12398e-46	1.81834e-44	-4.09924	2.88894e-37	2.01411e-36	-4.13041	2.44567e-42	2.51896e-41	-2.62549	5.15053e-47	1.30853e-46
ENSG00000235191	NUCB1-AS1	-2.73648	5.4854e-49	4.45215e-48	-3.01667	2.24901e-61	4.51404e-60	-2.91905	6.43905e-51	6.71052e-50	-2.85821	3.93936e-36	3.1113e-35	-2.81674	3.83913e-37	2.65685e-36	-2.91489	2.875e-40	2.49438e-39	-2.77366	1.67678e-95	1.19928e-94
ENSG00000235241	RP11-108M9.5	-2.20541	4.21884e-29	1.2038e-28	-2.73186	4.05456e-40	2.12296e-39	-2.66122	8.54359e-34	3.17791e-33	-2.686	1.041e-27	4.3902e-27	-2.74889	3.42546e-29	1.35195e-28	-2.72865	1.21743e-28	4.59514e-28	-2.74206	4.2297e-86	2.46368e-85
ENSG00000235298	RP11-575L7.8	-3.86861	3.78252e-64	8.17419e-63	-3.96607	7.70559e-69	2.42348e-67	-3.77736	1.03437e-53	1.32614e-52	-3.8588	2.75642e-46	5.8403e-45	-3.64856	2.65917e-47	4.51418e-46	-4.03698	1.35785e-50	3.12616e-49	-4.21386	1.36595e-157	4.47586e-156
ENSG00000235321	AC007556.3	-2.64315	1.10918e-28	3.09411e-28	-2.5882	6.31562e-29	1.87105e-28	-2.51153	3.66574e-25	9.15461e-25	-2.45119	6.04121e-19	1.50151e-18	-2.50775	2.00243e-20	4.85865e-20	-2.56106	1.2402e-20	3.00249e-20	-2.59884	2.07221e-68	8.18315e-68
ENSG00000235333	PVRIG2P	-4.07482	1.55859e-54	1.77531e-53	-4.07482	1.19938e-56	1.76217e-55	-4.07482	2.03351e-52	2.3699e-51	-4.07482	4.2845e-41	5.38045e-40	-4.07482	3.17703e-43	3.67222e-42	-4.07482	8.3465e-42	8.29353e-41	-4.07482	1.11334e-133	2.00857e-132
ENSG00000235568	NFAM1	-3.22905	8.27522e-52	7.96978e-51	-2.92942	1.53403e-41	8.68398e-41	-3.17971	1.10318e-46	8.68366e-46	-3.02121	5.64869e-35	4.04892e-34	-3.14629	6.68486e-40	5.76789e-39	-2.93664	9.79812e-36	5.94042e-35	-3.14848	1.14804e-107	1.08563e-106
ENSG00000236069	RP5-1011O1.3	-2.17844	1.495e-34	5.51574e-34	-2.13074	3.46826e-34	1.32685e-33	-2.14214	4.56561e-32	1.55988e-31	-2.09121	2.23317e-23	7.10601e-23	-2.13501	2.4686e-26	8.20925e-26	-2.17744	1.98143e-26	6.55359e-26	-2.1989	1.8248e-86	1.06953e-85
ENSG00000236120	RP11-733O18.1	-3.85314	9.98944e-67	2.69123e-65	-3.63274	3.61186e-61	7.1376e-60	-3.62401	2.64295e-57	4.40179e-56	-3.58784	1.09511e-44	1.95964e-43	-3.60371	3.08128e-47	5.20567e-46	-3.67443	3.26457e-47	5.3054e-46	-3.802	2.24288e-148	5.99662e-147
ENSG00000236698	EIF1AXP1	-3.1749	7.84568e-45	4.96388e-44	-3.53463	7.98956e-56	1.10582e-54	-3.80074	5.86e-59	1.12337e-57	-3.79223	6.91689e-44	1.15064e-42	-3.80512	7.14637e-48	1.27859e-46	-3.78789	2.11985e-46	3.22207e-45	-3.56679	1.20977e-116	1.40409e-115
ENSG00000236723	RP5-1024G6.2	-2.4001	5.3278e-39	2.43729e-38	-2.63981	1.86578e-43	1.189e-42	-2.42843	6.3633e-33	2.26354e-32	-2.42169	4.16731e-25	1.48314e-24	-2.45299	2.99265e-27	1.04761e-26	-2.61366	1.36468e-28	5.13304e-28	-2.30026	3.02014e-64	1.08861e-63
ENSG00000236773	RP11-365O16.1	-2.43486	3.12969e-44	1.91811e-43	-2.17315	1.41223e-40	7.57743e-40	-2.67181	2.03345e-44	1.37351e-43	-2.71735	5.80916e-39	5.94847e-38	-2.71431	4.9197e-40	4.28421e-39	-2.71468	3.70509e-39	2.92464e-38	-2.59948	3.81811e-100	3.02912e-99
ENSG00000236782	RP11-96L14.7	-2.87095	2.75184e-68	8.44737e-67	-2.86994	5.72491e-71	2.10611e-69	-2.81192	3.53388e-61	8.01809e-60	-2.79551	2.44962e-47	5.94065e-46	-2.83834	1.31565e-52	3.79866e-51	-2.84468	1.12837e-51	2.97173e-50	-2.88745	4.61116e-164	1.78984e-162
ENSG00000236850	BMS1P20	-2.39007	1.8456e-50	1.64066e-49	-2.54863	5.21687e-56	7.35058e-55	-2.19302	6.79952e-40	3.54834e-39	-2.16798	5.66606e-31	2.97226e-30	-2.22172	8.32962e-35	4.83777e-34	-2.22924	8.32831e-34	4.42314e-33	-2.63558	2.19486e-123	3.02303e-122
ENSG00000236876	TMSB4XP1	-4.3917	2.74317e-58	3.99703e-57	-3.95572	6.58068e-52	7.05109e-51	-3.70348	4.84637e-35	1.93498e-34	-3.87799	2.96255e-32	1.70865e-31	-3.62129	8.34903e-30	3.43067e-29	-4.02806	2.95264e-33	1.50734e-32	-4.05152	7.34537e-93	4.97339e-92
ENSG00000236963	LINC01141	-4.23058	1.02634e-47	7.72495e-47	-3.51597	2.03501e-41	1.1451e-40	-3.62504	5.38018e-40	2.82966e-39	-3.52946	6.35928e-30	3.11335e-29	-3.51238	1.29679e-31	6.00652e-31	-3.56346	3.96922e-31	1.74009e-30	-3.72353	2.55526e-92	1.70633e-91
ENSG00000237054	PRMT5-AS1	-2.8181	6.75851e-71	2.57371e-69	-2.8939	3.42199e-76	1.72817e-74	-2.69668	9.74344e-62	2.3112e-60	-2.7048	1.22533e-47	3.07923e-46	-2.7183	2.90254e-53	9.33716e-52	-2.78753	1.80793e-52	5.296e-51	-2.90029	4.07663e-175	2.11175e-173
ENSG00000237152	DLEU7-AS1	-3.47511	5.3389e-31	1.65439e-30	-3.38364	4.28345e-31	1.40865e-30	-2.63178	4.29812e-21	9.18696e-21	-2.7516	2.23614e-17	5.0933e-17	-2.49066	5.78156e-16	1.14045e-15	-2.9398	3.68098e-19	8.28647e-19	-3.5587	1.07135e-77	5.20708e-77
ENSG00000237181	AC147651.4	-2.81635	5.66488e-49	4.58989e-48	-2.72472	5.04124e-46	3.7863e-45	-2.35965	1.55563e-33	5.70507e-33	-2.16462	3.56614e-22	1.0623e-21	-2.26548	2.41201e-26	8.02674e-26	-2.32605	2.18658e-26	7.21015e-26	-2.6245	3.66141e-83	1.99572e-82
ENSG00000237248	LINC00987	-2.67317	7.13641e-43	4.03014e-42	-2.37108	9.63884e-37	4.2388e-36	-2.1471	2.61835e-32	9.04893e-32	-2.1442	8.50588e-25	2.9592e-24	-2.07449	1.20076e-25	3.84342e-25	-2.23646	3.75319e-26	1.21849e-25	-2.65781	6.80604e-101	5.49554e-100
ENSG00000237264	FTH1P11	-5.11288	1.504e-62	2.92295e-61	-4.21882	1.33379e-52	1.49033e-51	-5.3645	3.0239e-62	7.50119e-61	-5.37179	5.10513e-49	1.45023e-47	-5.40711	1.95977e-52	5.53369e-51	-5.37426	3.50236e-50	7.78364e-49	-5.22246	1.06971e-145	2.63962e-144
ENSG00000237286	AC004906.3	-3.08391	1.05351e-44	6.5973e-44	-3.06884	3.08537e-46	2.336e-45	-2.97975	8.32499e-40	4.322e-39	-2.96166	1.10311e-31	6.09047e-31	-3.03202	1.85522e-34	1.05319e-33	-3.0316	1.68342e-33	8.73322e-33	-3.0788	1.47104e-109	1.44439e-108
ENSG00000237350	CDC42P6	-2.55943	2.60314e-39	1.21411e-38	-2.33331	6.26878e-37	2.77758e-36	-2.8932	3.73186e-43	2.33593e-42	-2.85821	1.93964e-38	1.89131e-37	-2.89638	6.60723e-38	4.83615e-37	-2.82133	1.13111e-33	5.93128e-33	-2.90611	6.38033e-111	6.44436e-110
ENSG00000237422	RP11-305L7.3	-2.94097	3.15613e-36	1.25692e-35	-3.11839	3.08712e-40	1.62668e-39	-2.67033	2.28629e-28	6.63108e-28	-2.74025	1.95319e-23	6.232e-23	-2.64799	2.83145e-23	7.92514e-23	-2.89471	1.4077e-26	4.689e-26	-3.0982	1.56095e-92	1.04782e-91
ENSG00000237451	CDK2AP2P2	-2.37034	4.99774e-28	1.35394e-27	-2.17352	1.87291e-26	4.94645e-26	-2.4746	8.78396e-27	2.36285e-26	-2.36747	5.81413e-20	1.5261e-19	-2.55067	1.04383e-23	2.99665e-23	-2.46471	3.82831e-22	9.97611e-22	-2.30184	1.44502e-49	3.85978e-49
ENSG00000237499	RP11-356I2.4	-2.2353	9.55914e-38	4.09263e-37	-2.18032	3.66897e-38	1.72896e-37	-2.07424	7.71016e-33	2.7323e-32	-2.03552	1.51159e-24	5.18712e-24	-2.0406	1.41264e-26	4.75152e-26	-2.12592	2.30159e-27	8.05299e-27	-2.15641	5.963e-89	3.67375e-88
ENSG00000237541	HLA-DQA2	-4.01927	9.62682e-33	3.23265e-32	-3.76741	1.3153e-28	3.83698e-28	-3.54424	2.44496e-25	6.15389e-25	-3.55923	2.45108e-20	6.56447e-20	-3.51546	3.29745e-20	7.92039e-20	-3.6127	1.05632e-20	2.56745e-20	-3.99492	2.26636e-75	1.0539e-74
ENSG00000237768	RP11-344N10.2	-3.99927	1.7426e-59	2.75879e-58	-4.04927	9.5573e-63	2.08779e-61	-3.45957	1.14372e-39	5.88785e-39	-3.6528	2.68957e-32	1.55887e-31	-3.39855	7.45158e-32	3.51029e-31	-3.83829	6.57423e-41	6.03066e-40	-3.81613	6.20311e-111	6.27436e-110
ENSG00000237797	RP11-472N13.3	-4.35216	1.32933e-53	1.43747e-52	-3.54296	1.22118e-45	8.92916e-45	-3.59196	8.17277e-39	4.02098e-38	-3.59596	3.01855e-31	1.61716e-30	-3.46549	1.08396e-30	4.71679e-30	-3.7299	2.37858e-34	1.31017e-33	-3.82469	5.60139e-99	4.3317e-98
ENSG00000238142	RP11-108M9.4	-2.28689	1.64059e-26	4.14932e-26	-2.94938	2.93015e-37	1.31442e-36	-3.17256	1.98933e-33	7.25969e-33	-3.25194	5.03662e-30	2.48916e-29	-3.21436	1.64055e-30	7.05165e-30	-3.38231	3.175e-30	1.31537e-29	-2.99401	8.9051e-67	3.39116e-66
ENSG00000238221	RP11-69L16.4	-2.9337	2.02789e-52	2.03077e-51	-3.27381	3.55339e-63	7.94719e-62	-2.97581	2.34869e-46	1.80836e-45	-2.90889	5.26709e-35	3.79608e-34	-2.9447	2.96004e-41	2.87436e-40	-3.131	5.42746e-43	5.94658e-42	-3.18706	1.86606e-112	1.97393e-111
ENSG00000238449	AC019131.1	-2.74733	1.2259e-29	3.57617e-29	-2.74733	8.18007e-31	2.64655e-30	-2.74733	1.84262e-28	5.37082e-28	-2.74733	3.73622e-22	1.11219e-21	-2.74733	2.42693e-23	6.82e-23	-2.74733	1.50083e-22	4.01037e-22	-2.74733	1.46422e-73	6.49382e-73
ENSG00000238742	MIR2110	-3.12172	2.51649e-43	1.46255e-42	-3.12172	5.06923e-45	3.56059e-44	-3.12172	1.25385e-41	7.20212e-41	-3.12172	1.54442e-32	9.10117e-32	-3.12172	3.00737e-34	1.68217e-33	-3.12172	4.15122e-33	2.09045e-32	-3.12172	9.17035e-107	8.4617e-106
ENSG00000238917	SNORD10	-3.68745	3.94084e-55	4.73371e-54	-3.68745	2.88183e-57	4.42803e-56	-3.68745	5.41067e-53	6.60055e-52	-3.68745	1.49681e-41	1.97287e-40	-3.68745	1.05461e-43	1.26895e-42	-3.68745	2.86662e-42	2.93324e-41	-3.68745	4.13744e-135	7.73163e-134
ENSG00000238923	RNU7-1	-4.67044	6.2841e-48	4.79908e-47	-4.67044	8.51467e-50	8.06804e-49	-4.67044	4.65568e-46	3.51735e-45	-4.67044	4.77574e-36	3.74667e-35	-4.67044	6.24567e-38	4.58341e-37	-4.67044	1.1241e-36	7.30897e-36	-4.67044	7.74846e-118	9.26004e-117
ENSG00000239039	SNORD13	-6.33356	2.3113e-58	3.38526e-57	-6.33356	1.28309e-60	2.43321e-59	-6.33356	4.18044e-56	6.31323e-55	-6.33356	5.03757e-44	8.4701e-43	-6.33356	2.69281e-46	4.12858e-45	-6.33356	8.79909e-45	1.16741e-43	-6.33356	7.64818e-143	1.75796e-141
ENSG00000239127	SNORD125	-3.08938	8.82012e-49	7.05309e-48	-3.08938	1.11069e-50	1.10364e-49	-3.08938	7.03125e-47	5.60987e-46	-3.08938	1.06673e-36	8.91475e-36	-3.08938	1.29622e-38	1.00682e-37	-3.08938	2.45007e-37	1.68316e-36	-3.08938	6.93431e-120	8.77059e-119
ENSG00000239183	SNORA84	-2.53559	1.6202e-34	5.95581e-34	-2.57028	8.52883e-37	3.76123e-36	-2.43254	3.92597e-29	1.17869e-28	-2.33153	1.04089e-19	2.70295e-19	-2.40617	3.95632e-23	1.10124e-22	-2.50158	3.44189e-25	1.05794e-24	-2.20909	4.8522e-52	1.35677e-51
ENSG00000239203	AC093484.4	-2.77056	1.12612e-47	8.4444e-47	-2.74256	7.55607e-49	6.70857e-48	-2.55729	3.25872e-39	1.63633e-38	-2.57845	3.99466e-31	2.11916e-30	-2.55172	5.99367e-33	3.05539e-32	-2.56129	8.64054e-32	3.94508e-31	-2.75832	5.57853e-113	5.97276e-112
ENSG00000239213	NCK1-AS1	-3.03688	3.62924e-44	2.22041e-43	-3.54421	1.83245e-58	3.01978e-57	-3.22813	2.91965e-49	2.73341e-48	-3.25993	1.36835e-37	1.23988e-36	-3.07694	1.8698e-38	1.4326e-37	-3.50191	2.44335e-41	2.32143e-40	-3.42083	2.98401e-124	4.2341e-123
ENSG00000239713	APOBEC3G	-2.92893	9.23242e-67	2.50163e-65	-2.79764	7.97146e-61	1.5323e-59	-2.85014	4.20248e-62	1.028e-60	-2.71329	2.69298e-46	5.71447e-45	-2.70828	1.53959e-48	2.92751e-47	-2.76272	1.89912e-50	4.30896e-49	-2.91314	5.04914e-136	9.63989e-135
ENSG00000239718	HLTF-AS1	-2.18945	3.84571e-42	2.07451e-41	-2.19181	7.47655e-44	4.8703e-43	-2.17596	6.74452e-40	3.52225e-39	-2.15214	7.0626e-30	3.44332e-29	-2.18124	5.05149e-33	2.58632e-32	-2.18692	4.20371e-32	1.95738e-31	-2.18878	1.34813e-103	1.15824e-102
ENSG00000239961	LILRA4	-5.6941	2.13539e-54	2.41087e-53	-5.31209	2.59524e-50	2.52534e-49	-5.37933	7.35898e-48	6.28412e-47	-5.15258	3.16625e-35	2.32477e-34	-5.17613	5.28238e-37	3.60779e-36	-5.20359	3.62626e-37	2.4529e-36	-5.61309	3.74122e-127	5.77369e-126
ENSG00000239969	RP11-163E9.2	-2.14184	1.47203e-38	6.5865e-38	-2.19126	2.65997e-41	1.4849e-40	-2.14051	2.69772e-36	1.14906e-35	-2.16657	6.2469e-29	2.85683e-28	-2.13464	3.67369e-29	1.44587e-28	-2.21566	4.31103e-30	1.7704e-29	-2.1119	1.12009e-83	6.16971e-83
ENSG00000239998	LILRA2	-5.2675	3.3228e-71	1.28976e-69	-4.81971	9.22976e-60	1.65665e-58	-4.93863	3.98222e-60	8.20315e-59	-4.82912	3.68893e-47	8.60546e-46	-4.87875	1.06371e-50	2.49379e-49	-4.74834	9.43917e-49	1.81691e-47	-5.06764	5.27869e-147	1.35477e-145
ENSG00000240036	RP11-587D21.1	-2.69167	4.89824e-48	3.76932e-47	-2.37621	1.1492e-42	6.96441e-42	-3.04061	2.14978e-48	1.89315e-47	-2.94752	3.25081e-35	2.38066e-34	-2.93484	3.09715e-35	1.86252e-34	-3.21279	1.30515e-44	1.69645e-43	-3.21821	4.11416e-120	5.24127e-119
ENSG00000240065	PSMB9	-3.18457	4.10625e-44	2.50572e-43	-2.63217	6.07664e-33	2.19707e-32	-2.92369	2.30933e-37	1.04491e-36	-2.69392	2.63804e-25	9.54301e-25	-2.71245	5.79292e-29	2.25413e-28	-2.57023	1.37152e-26	4.57499e-26	-2.39814	4.67342e-54	1.3653e-53
ENSG00000240143	RP4-753P9.3	-5.31824	6.33212e-77	3.94777e-75	-5.24355	2.69089e-70	9.47865e-69	-4.98314	1.77354e-59	3.47554e-58	-5.01638	2.04961e-47	5.00504e-46	-4.99241	1.70771e-47	2.93434e-46	-5.18448	1.76306e-52	5.17532e-51	-5.36588	4.07288e-168	1.7712e-166
ENSG00000240233	RN7SL587P	-3.76748	1.98233e-37	8.3601e-37	-3.69649	9.88358e-38	4.5614e-37	-2.82195	8.70607e-23	1.98461e-22	-2.85193	3.65787e-19	9.1969e-19	-2.76713	2.09913e-17	4.40328e-17	-3.21501	4.80171e-22	1.24436e-21	-2.56705	4.37136e-36	9.05904e-36
ENSG00000240303	ACAD11	-3.23458	1.74117e-61	3.13321e-60	-3.27494	1.17866e-64	2.91869e-63	-2.94358	9.94724e-54	1.27647e-52	-3.02548	4.73295e-43	7.20165e-42	-2.96255	4.09194e-45	5.65804e-44	-3.13596	7.26939e-46	1.06251e-44	-3.30196	7.06376e-153	2.09533e-151
ENSG00000240409	MTATP8P1	-3.32056	2.41934e-40	1.19399e-39	-3.05792	1.09933e-37	5.06195e-37	-4.05896	2.23526e-57	3.74939e-56	-4.10132	5.51461e-47	1.26138e-45	-4.10059	2.80308e-49	5.77418e-48	-4.07978	6.34356e-47	9.9644e-46	-3.5729	1.92662e-77	9.30936e-77
ENSG00000240671	IGKV1-8	-3.89409	1.29293e-33	4.54412e-33	-3.89338	6.15997e-35	2.46644e-34	-3.84435	1.38626e-31	4.62745e-31	-3.85259	1.00535e-24	3.47787e-24	-3.88774	1.88748e-26	6.311e-26	-3.89409	1.31447e-25	4.1369e-25	-3.89409	2.91145e-83	1.59063e-82
ENSG00000240720	LRRD1	-3.07339	8.84982e-49	7.06882e-48	-3.16193	7.18518e-52	7.68711e-51	-3.01284	8.96165e-46	6.64048e-45	-3.05652	2.1643e-36	1.75158e-35	-3.00811	7.92211e-38	5.75374e-37	-3.1179	1.03936e-37	7.33328e-37	-3.1686	1.85084e-122	2.50512e-121
ENSG00000240929	HIST2H2BB	-2.94959	4.13347e-34	1.48497e-33	-3.063	4.58106e-37	2.03811e-36	-3.0911	1.45366e-34	5.64401e-34	-3.07913	1.28787e-26	5.02661e-26	-3.08807	2.23859e-28	8.37315e-28	-3.09622	1.65366e-27	5.8411e-27	-3.07333	9.54372e-88	5.73926e-87
ENSG00000240972	MIF	-4.09093	2.00313e-50	1.77579e-49	-4.7772	4.32261e-74	1.93351e-72	-5.04573	8.35958e-65	2.69534e-63	-5.00622	3.24265e-50	1.03603e-48	-5.10629	2.07829e-57	1.00285e-55	-5.06417	7.22692e-57	3.53567e-55	-4.63209	6.15131e-125	8.84408e-124
ENSG00000240979	RP11-79D8.2	-2.18745	2.33702e-42	1.27581e-41	-2.18745	5.11869e-44	3.37178e-43	-2.18745	1.0709e-40	5.86435e-40	-2.18745	8.43172e-32	4.70693e-31	-2.18745	1.78585e-33	9.41716e-33	-2.18745	2.33078e-32	1.10612e-31	-2.18745	1.97452e-104	1.72053e-103
ENSG00000241343	RPL36A	-2.29873	1.39456e-53	1.5057e-52	-2.47025	8.33846e-57	1.24327e-55	-2.33965	1.86514e-49	1.76374e-48	-2.43884	2.23769e-41	2.88992e-40	-2.28775	2.38022e-40	2.12806e-39	-2.64364	3.66002e-47	5.90718e-46	-2.28855	1.36522e-103	1.17221e-102
ENSG00000241351	IGKV3-11	-3.89801	1.91927e-33	6.68377e-33	-3.89264	9.71255e-35	3.84518e-34	-3.83555	2.96797e-31	9.73206e-31	-3.79381	1.76364e-23	5.64508e-23	-3.86596	5.25539e-26	1.71171e-25	-3.87408	6.22929e-25	1.88835e-24	-3.89921	1.93847e-82	1.03773e-81
ENSG00000241353	PPP1R2P4	-2.21718	1.2256e-27	3.26936e-27	-2.21718	9.77445e-29	2.86801e-28	-2.21718	1.54109e-26	4.09081e-26	-2.21718	1.20212e-20	3.27491e-20	-2.21718	9.34585e-22	2.41222e-21	-2.21718	5.12717e-21	1.26363e-20	-2.21718	1.16618e-68	4.63511e-68
ENSG00000241399	CD302	-5.56185	1.42883e-70	5.32599e-69	-5.48982	1.6653e-67	4.88836e-66	-4.80555	1.11663e-61	2.631e-60	-4.85143	3.75033e-46	7.80533e-45	-4.66586	5.29884e-50	1.16657e-48	-4.99106	2.40318e-50	5.40907e-49	-5.7693	2.31447e-175	1.20781e-173
ENSG00000241489	IDS	-4.41792	1.22726e-77	8.15666e-76	-4.43029	1.56577e-81	1.13137e-79	-3.95054	4.03707e-61	9.10117e-60	-3.92472	4.28453e-49	1.22701e-47	-3.79476	6.03696e-50	1.32493e-48	-4.12565	1.73033e-54	6.36562e-53	-4.3914	2.68812e-171	1.28392e-169
ENSG00000241506	PSMC1P1	-2.42455	8.49918e-68	2.51056e-66	-2.45295	1.15922e-64	2.87561e-63	-2.58319	7.56841e-69	3.51944e-67	-2.60402	1.92158e-54	9.56715e-53	-2.61303	3.71031e-57	1.7543e-55	-2.67051	1.50368e-59	9.99381e-58	-2.26263	2.13851e-118	2.60654e-117
ENSG00000241720	RP4-735C1.4	-2.77021	8.03214e-29	2.25714e-28	-3.05578	2.15177e-33	7.93883e-33	-3.21529	1.70005e-32	5.92913e-32	-3.19332	3.5873e-25	1.28515e-24	-3.25395	5.39112e-27	1.85678e-26	-3.23531	1.9054e-26	6.31101e-26	-3.02015	7.73795e-65	2.82748e-64
ENSG00000241728	AP001062.8	-2.11023	5.58758e-47	3.99843e-46	-2.11023	8.21448e-49	7.28395e-48	-2.11023	3.81523e-45	2.68917e-44	-2.11023	2.53065e-35	1.87273e-34	-2.11023	3.59191e-37	2.49065e-36	-2.11023	6.12141e-36	3.77464e-35	-2.11023	1.47806e-115	1.68358e-114
ENSG00000241839	PLEKHO2	-3.76738	1.48892e-45	9.817e-45	-3.45602	2.41408e-45	1.73278e-44	-4.0267	1.07684e-54	1.48027e-53	-3.62708	1.18766e-40	1.4364e-39	-3.87134	5.91386e-42	6.12693e-41	-3.48677	9.83107e-44	1.14954e-42	-3.48617	1.12986e-84	6.3577e-84
ENSG00000242073	AC006014.7	-2.16136	7.16241e-55	8.4239e-54	-2.16136	5.35501e-57	8.08704e-56	-2.16136	9.61831e-53	1.15633e-51	-2.16136	2.36393e-41	3.04523e-40	-2.16136	1.70295e-43	2.00456e-42	-2.16136	4.56093e-42	4.60011e-41	-2.16136	1.72985e-134	3.18192e-133
ENSG00000242258	LINC00996	-3.16344	5.55309e-28	1.50207e-27	-3.08348	7.28086e-28	2.04439e-27	-3.06605	1.50866e-25	3.83633e-25	-3.02788	1.2046e-19	3.11485e-19	-3.08424	2.68497e-21	6.77979e-21	-3.11441	7.57233e-21	1.85329e-20	-3.13078	1.24446e-67	4.83175e-67
ENSG00000242288	RP11-464F9.1	-2.88574	9.93014e-54	1.08126e-52	-2.88594	8.14554e-56	1.12631e-54	-2.88638	1.18787e-51	1.29644e-50	-2.88638	1.7405e-40	2.05816e-39	-2.88638	1.38167e-42	1.51736e-41	-2.88638	3.46856e-41	3.24731e-40	-2.88638	8.98203e-132	1.54904e-130
ENSG00000242299	RP11-234A1.1	-2.06513	4.39908e-35	1.66397e-34	-2.63705	9.54081e-53	1.07286e-51	-3.33062	1.89474e-52	2.21184e-51	-3.35615	2.18159e-39	2.3234e-38	-3.21782	4.25182e-44	5.311e-43	-3.37234	7.96158e-43	8.56325e-42	-2.66405	6.56395e-94	4.54477e-93
ENSG00000242338	BMS1P4	-3.40906	2.85531e-56	3.66406e-55	-3.43825	1.49788e-59	2.6514e-58	-2.72968	2.84096e-42	1.69113e-41	-2.85651	1.26583e-35	9.60452e-35	-2.66948	7.49737e-34	4.08026e-33	-3.11885	7.83408e-40	6.53149e-39	-3.31109	3.35701e-128	5.30272e-127
ENSG00000242522	KLHL6-AS1	-2.7844	4.79412e-33	1.63478e-32	-2.74722	1.0701e-33	3.99302e-33	-2.5321	2.23815e-26	5.90662e-26	-2.54253	7.74902e-21	2.13792e-20	-2.44654	2.36523e-20	5.72317e-20	-2.67143	1.01765e-23	2.88853e-23	-2.77312	6.04782e-81	3.15256e-80
ENSG00000242539	AC007620.3	-3.10409	8.21403e-66	2.05935e-64	-3.10409	2.4207e-68	7.36668e-67	-3.10409	2.7989e-63	7.52604e-62	-3.10409	9.91155e-50	3.01628e-48	-3.10409	2.80964e-52	7.83919e-51	-3.10409	1.40126e-50	3.22085e-49	-3.10409	1.22025e-160	4.24527e-159
ENSG00000242574	HLA-DMB	-6.75663	6.22537e-74	3.08857e-72	-6.09925	1.12139e-56	1.65103e-55	-6.13031	3.51799e-66	1.31134e-64	-6.03867	3.42299e-47	8.02494e-46	-5.90007	1.40953e-49	2.9731e-48	-6.01369	3.18132e-50	7.10377e-49	-6.52468	3.11359e-143	7.25133e-142
ENSG00000242616	GNG10	-4.94383	2.5435e-62	4.87591e-61	-4.80827	1.15691e-62	2.52335e-61	-4.51413	5.93655e-53	7.22331e-52	-4.61167	1.87762e-43	2.95594e-42	-4.58883	3.00265e-45	4.21388e-44	-4.66306	2.67263e-44	3.32368e-43	-4.8977	3.70947e-144	8.85873e-143
ENSG00000242856	VN1R105P	-2.07778	1.58274e-39	7.46096e-39	-2.07609	4.79719e-41	2.64239e-40	-2.07021	9.12472e-38	4.20292e-37	-2.07778	1.20164e-29	5.75693e-29	-2.0687	4.88108e-31	2.16817e-30	-2.07529	4.02728e-30	1.65871e-29	-2.07778	1.34768e-97	1.01058e-96
ENSG00000242960	FTH1P23	-4.52681	1.41753e-56	1.85969e-55	-3.87522	2.4574e-48	2.12291e-47	-4.3857	4.1035e-52	4.69305e-51	-4.42278	1.74118e-40	2.05816e-39	-4.4125	1.62734e-42	1.77608e-41	-4.4383	1.10781e-41	1.08926e-40	-4.34797	1.3138e-124	1.87363e-123
ENSG00000243056	EIF4EBP3	-3.68062	1.32463e-64	2.95784e-63	-3.81328	5.38493e-71	1.98622e-69	-3.69593	3.31992e-56	5.05159e-55	-3.55992	1.99034e-41	2.5847e-40	-3.63255	1.86925e-48	3.52581e-47	-3.47003	1.6853e-42	1.76287e-41	-3.28441	5.9161e-102	4.90629e-101
ENSG00000243207	PPAN-P2RY11	-3.69634	5.11186e-73	2.32342e-71	-3.69755	7.86065e-76	3.87261e-74	-3.69087	4.97511e-70	2.50574e-68	-3.69078	3.67869e-55	1.93406e-53	-3.69546	4.7688e-58	2.41699e-56	-3.69641	3.44759e-56	1.51329e-54	-3.69759	7.42332e-178	4.08573e-176
ENSG00000243414	TICAM2	-2.25475	1.94e-34	7.09988e-34	-2.24845	1.06739e-35	4.44298e-35	-2.20501	2.83879e-32	9.79396e-32	-2.2071	3.75618e-25	1.34224e-24	-2.19741	1.87799e-26	6.28076e-26	-2.23261	5.84132e-26	1.87438e-25	-2.22642	5.98524e-84	3.31103e-83
ENSG00000243547	HNRNPKP4	-2.07186	3.88374e-56	4.94772e-55	-2.00717	3.26425e-54	4.05942e-53	-2.20654	2.6252e-55	3.73627e-54	-2.20387	1.40258e-44	2.4921e-43	-2.20334	2.09312e-51	5.34276e-50	-2.09344	9.98974e-44	1.16616e-42	-2.44289	3.04975e-163	1.14285e-161
ENSG00000243613	RP11-216N14.8	-2.65423	1.28654e-46	9.01861e-46	-2.66695	9.8861e-49	8.73323e-48	-2.54942	3.74728e-39	1.87764e-38	-2.58291	4.81329e-32	2.73134e-31	-2.62044	4.80592e-35	2.85117e-34	-2.6237	1.50957e-34	8.42036e-34	-2.66017	7.3207e-111	7.38888e-110
ENSG00000243646	IL10RB	-3.47866	8.759e-56	1.08544e-54	-3.29298	6.63089e-55	8.63487e-54	-3.69998	1.04169e-60	2.26852e-59	-3.51398	5.80856e-47	1.32218e-45	-3.5541	2.21986e-48	4.13728e-47	-3.56811	1.69041e-50	3.85403e-49	-3.0083	1.58935e-93	1.09613e-92
ENSG00000243678	NME1-NME2	-3.65489	1.37259e-63	2.86092e-62	-3.78508	1.0457e-67	3.09536e-66	-3.8289	1.75823e-60	3.73657e-59	-3.85313	2.46772e-48	6.54806e-47	-3.90141	2.72715e-53	8.81318e-52	-3.96378	4.95497e-50	1.08578e-48	-3.3193	8.9676e-107	8.28004e-106
ENSG00000243725	TTC4	-2.42418	1.35283e-55	1.65463e-54	-2.51059	8.85929e-59	1.49494e-57	-2.28094	1.64711e-47	1.37324e-46	-2.31845	6.38309e-41	7.8343e-40	-2.3388	2.06928e-42	2.22736e-41	-2.40883	3.40284e-43	3.7872e-42	-2.48922	4.46739e-121	5.8554e-120
ENSG00000243749	ZMYM6NB	-6.71103	5.94498e-100	3.9888e-97	-6.70517	2.59288e-103	1.58842e-100	-6.71172	1.29016e-95	8.6777e-93	-6.70253	4.60354e-75	2.82017e-72	-6.69715	8.68073e-79	5.09631e-76	-6.70527	1.83871e-76	1.07948e-73	-6.68888	5.03196e-235	2.21564e-232
ENSG00000243960	RP11-552M11.4	-4.15592	5.74144e-57	7.73393e-56	-4.37733	5.93196e-69	1.89098e-67	-3.41658	7.58375e-52	8.46712e-51	-3.61954	4.18882e-41	5.2744e-40	-3.4335	9.9866e-42	1.0167e-40	-3.87096	2.20654e-49	4.51236e-48	-4.67383	4.30001e-168	1.8585e-166
ENSG00000243989	ACY1	-2.36524	1.69117e-44	1.05111e-43	-2.9793	1.63807e-62	3.53453e-61	-2.9201	1.96337e-55	2.83152e-54	-2.84108	1.74248e-42	2.50016e-41	-2.9461	7.6978e-48	1.37294e-46	-2.92593	2.97374e-45	4.14031e-44	-2.664	1.50639e-110	1.51068e-109
ENSG00000244038	DDOST	-2.69	7.2614e-44	4.36117e-43	-2.61273	8.86108e-40	4.55833e-39	-2.56545	9.76996e-48	8.2877e-47	-2.4905	7.09796e-37	6.02472e-36	-2.61277	1.02162e-43	1.23242e-42	-2.25109	1.62595e-35	9.67467e-35	-2.7732	3.34787e-58	1.06434e-57
ENSG00000244045	TMEM199	-2.23701	4.3937e-55	5.25528e-54	-2.24095	6.46842e-61	1.25386e-59	-2.07152	9.44446e-52	1.04207e-50	-2.05536	2.36443e-41	3.04523e-40	-2.07943	9.46946e-47	1.53186e-45	-2.18507	9.35113e-49	1.80243e-47	-2.56662	9.80555e-125	1.4055e-123
ENSG00000244115	DNAJC25-GNG10	-4.96553	1.12077e-62	2.19328e-61	-4.96553	4.31038e-65	1.09825e-63	-4.96553	2.92628e-60	6.08131e-59	-4.96553	2.50232e-47	6.03729e-46	-4.96553	9.26057e-50	1.99818e-48	-4.96553	3.86653e-48	6.94006e-47	-4.96553	3.73278e-153	1.11666e-151
ENSG00000244151	RP11-148K1.12	-2.41671	8.30643e-56	1.03208e-54	-2.66383	2.28019e-67	6.65172e-66	-2.73888	4.38286e-66	1.60819e-64	-2.58039	6.27011e-45	1.14735e-43	-2.6877	5.18904e-53	1.61043e-51	-2.67273	3.8707e-52	1.07996e-50	-2.74519	6.65183e-165	2.64012e-163
ENSG00000244255	XXbac-BPG116M5.17	-5.18182	1.54453e-76	9.34007e-75	-5.18182	1.83489e-79	1.15936e-77	-5.18182	1.30568e-73	8.63709e-72	-5.18182	5.89656e-58	4.07267e-56	-5.18182	6.73184e-61	4.45313e-59	-5.18182	6.15612e-59	3.82113e-57	-5.18182	3.22433e-186	2.24905e-184
ENSG00000244380	RP11-24C3.2	-4.21998	2.1262e-74	1.08152e-72	-4.28606	1.29069e-78	7.77175e-77	-4.11549	2.34178e-66	8.89371e-65	-4.13922	4.1437e-53	1.81884e-51	-4.10233	2.16794e-55	8.58042e-54	-4.17723	5.30335e-55	2.08727e-53	-4.2649	8.87788e-176	4.73823e-174
ENSG00000244482	LILRA6	-2.75253	3.42047e-27	8.93648e-27	-2.63524	1.41165e-26	3.74791e-26	-2.68713	2.3875e-25	6.01572e-25	-2.67461	1.22795e-19	3.17172e-19	-2.70971	4.93111e-21	1.23081e-20	-2.68552	4.08056e-20	9.62261e-20	-2.69008	7.71421e-65	2.82027e-64
ENSG00000244491	RP3-508I15.18	-2.70561	3.21934e-53	3.41828e-52	-2.70716	2.50769e-55	3.3555e-54	-2.68224	8.26982e-50	8.02491e-49	-2.65439	1.2048e-38	1.19462e-37	-2.68645	1.91237e-41	1.89489e-40	-2.69105	2.45749e-40	2.15069e-39	-2.70798	1.12603e-130	1.88206e-129
ENSG00000244493	SLC9A9-AS2	-3.3522	1.74174e-55	2.12293e-54	-3.32639	4.69652e-57	7.10783e-56	-2.596	4.02939e-33	1.44758e-32	-2.62578	5.76185e-28	2.46462e-27	-2.43213	6.48314e-28	2.3604e-27	-2.91403	8.35383e-32	3.81789e-31	-3.34138	1.81378e-132	3.19053e-131
ENSG00000244509	APOBEC3C	-4.14485	1.37095e-70	5.12379e-69	-3.61848	1.30209e-53	1.55875e-52	-4.15506	7.38966e-66	2.6293e-64	-3.95686	4.99476e-47	1.14994e-45	-3.99553	3.14563e-52	8.72596e-51	-3.85359	1.90932e-48	3.58698e-47	-3.64076	4.55539e-122	6.09548e-121
ENSG00000244563	AC006011.4	-3.13437	5.77551e-68	1.72409e-66	-3.13437	1.41796e-70	5.0967e-69	-3.13437	2.36234e-65	8.02058e-64	-3.13437	2.21718e-51	8.07238e-50	-3.13437	5.23478e-54	1.8167e-52	-3.13437	2.94921e-52	8.34425e-51	-3.13437	8.88296e-166	3.58627e-164
ENSG00000244641	RPS26P43	-2.26997	1.38935e-28	3.8558e-28	-2.30473	2.20066e-30	6.99149e-30	-2.22939	6.76319e-26	1.74914e-25	-2.26714	3.84815e-21	1.07923e-20	-2.19378	9.91602e-21	2.4426e-20	-2.26353	1.50626e-21	3.81096e-21	-2.22148	9.16242e-65	3.34279e-64
ENSG00000244682	FCGR2C	-2.75701	1.60415e-47	1.19212e-46	-2.52925	5.95385e-36	2.51393e-35	-2.36239	7.04631e-35	2.79119e-34	-2.31328	1.11442e-26	4.36294e-26	-2.20983	1.28583e-26	4.33431e-26	-2.36486	9.4972e-30	3.82768e-29	-2.77951	5.66209e-105	4.99555e-104
ENSG00000244687	UBE2V1	-3.19801	8.20069e-58	1.16128e-56	-3.50433	6.56184e-68	1.97135e-66	-2.44066	8.15227e-42	4.72503e-41	-2.56998	4.83867e-33	2.96937e-32	-2.3181	2.9417e-33	1.53003e-32	-3.00894	4.19574e-43	4.63307e-42	-3.6054	2.04035e-136	3.9544e-135
ENSG00000245105	A2M-AS1	-2.91643	4.79504e-42	2.57184e-41	-3.56895	1.09036e-59	1.94718e-58	-2.77448	1.99705e-44	1.34957e-43	-2.81209	2.40556e-35	1.78486e-34	-2.64921	1.4108e-35	8.67287e-35	-3.00016	3.37313e-36	2.12556e-35	-3.92588	2.25387e-142	5.13869e-141
ENSG00000245112	SMARCA5-AS1	-2.44992	6.15822e-55	7.31613e-54	-2.47159	7.05683e-57	1.05553e-55	-2.18256	9.61933e-43	5.87755e-42	-2.16296	1.51246e-33	9.66026e-33	-2.13907	8.56411e-37	5.75433e-36	-2.19213	4.58909e-37	3.07321e-36	-2.53827	3.15146e-136	6.04138e-135
ENSG00000245385	RP11-334E6.10	-3.02985	2.40474e-63	4.91056e-62	-3.02985	8.73781e-66	2.33616e-64	-3.02985	6.64565e-61	1.47228e-59	-3.02985	7.69542e-48	1.96428e-46	-3.02985	2.69043e-50	6.10438e-49	-3.02985	1.16674e-48	2.22454e-47	-3.02985	9.45083e-155	2.93309e-153
ENSG00000245748	RP11-367J11.2	-3.19123	2.14251e-51	1.99921e-50	-3.30525	5.17336e-55	6.78703e-54	-3.18317	1.19311e-48	1.07076e-47	-3.12301	9.62728e-37	8.08875e-36	-3.15287	4.86157e-40	4.23621e-39	-3.19259	7.61356e-39	5.88454e-38	-3.34932	8.64894e-131	1.45076e-129
ENSG00000245864	CTC-467M3.1	-4.84364	4.14374e-69	1.34839e-67	-4.72964	1.79002e-68	5.49485e-67	-4.55323	5.05061e-57	8.23646e-56	-4.65248	4.66099e-48	1.21393e-46	-4.53111	8.83881e-49	1.72253e-47	-4.66942	2.0123e-49	4.16348e-48	-4.59181	1.61022e-138	3.26446e-137
ENSG00000245970	SNORA72	-3.19009	4.91892e-61	8.60964e-60	-3.78195	1.58122e-77	8.80608e-76	-3.19286	3.10417e-61	7.06587e-60	-3.30891	4.03409e-49	1.15764e-47	-3.18644	8.37961e-50	1.81087e-48	-3.54909	2.79793e-55	1.1296e-53	-3.76459	6.36324e-127	9.72429e-126
ENSG00000246203	RP11-29H23.5	-2.46507	2.40092e-35	9.18515e-35	-2.76941	1.21876e-54	1.55265e-53	-2.81772	8.29189e-62	1.97687e-60	-2.73848	4.69937e-46	9.72308e-45	-2.77916	2.48073e-48	4.61737e-47	-2.81014	1.31434e-50	3.03592e-49	-2.83561	4.30733e-135	8.03845e-134
ENSG00000247774	PCED1B-AS1	-4.38198	1.37707e-72	6.00708e-71	-3.92536	3.37005e-58	5.47681e-57	-4.08518	4.95773e-65	1.62075e-63	-4.0998	3.3176e-51	1.18342e-49	-3.96205	1.76073e-51	4.52713e-50	-4.05897	2.25171e-51	5.70622e-50	-4.03215	6.23512e-141	1.3495e-139
ENSG00000248098	BCKDHA	-4.40015	1.30592e-76	8.03514e-75	-4.49181	7.47681e-81	5.16413e-79	-4.1787	1.15643e-69	5.69725e-68	-4.12108	2.34578e-53	1.04927e-51	-4.18191	1.46025e-57	7.11935e-56	-4.28618	2.03679e-56	9.25752e-55	-4.47824	4.29178e-186	2.97888e-184
ENSG00000248167	TRIM39-RPP21	-3.28645	2.80137e-81	2.4365e-79	-3.28645	2.22898e-84	1.89195e-82	-3.28645	3.53591e-78	3.34369e-76	-3.28645	1.35531e-61	1.29029e-59	-3.28645	1.03605e-64	9.47917e-63	-3.28645	1.23788e-62	1.11094e-60	-3.28645	1.63249e-197	1.53345e-195
ENSG00000248208	RP11-153M7.1	-3.41046	3.53867e-38	1.55037e-37	-3.13089	3.04589e-34	1.16939e-33	-2.69372	2.18117e-25	5.51159e-25	-2.68993	1.88585e-19	4.81632e-19	-2.57702	6.10917e-20	1.4484e-19	-2.76189	1.49765e-20	3.60346e-20	-3.2414	2.49669e-81	1.30969e-80
ENSG00000248223	CTD-2139B15.2	-5.17639	3.34679e-64	7.266e-63	-5.17687	1.1185e-66	3.11457e-65	-5.16375	1.67416e-61	3.87338e-60	-5.15346	5.24889e-48	1.35701e-46	-5.17687	5.47397e-51	1.32523e-49	-5.17687	2.49263e-49	5.06069e-48	-5.1766	8.54893e-157	2.72521e-155
ENSG00000248565	TECRP2	-3.67378	5.02556e-101	4.1653e-98	-3.67025	2.02604e-104	1.42734e-101	-3.55404	3.00163e-60	6.2287e-59	-3.62766	7.12288e-69	1.52063e-66	-3.69065	1.73069e-80	1.35475e-77	-3.69048	1.77689e-78	1.39091e-75	-3.69684	2.65728e-246	1.97059e-243
ENSG00000248643	RBM14-RBM4	-4.83706	1.47725e-78	1.07847e-76	-5.24921	2.93854e-96	7.01763e-94	-4.38805	5.40212e-66	1.95671e-64	-4.46262	2.47271e-52	1.00405e-50	-4.24521	8.76339e-53	2.61049e-51	-4.77912	1.20379e-58	7.27959e-57	-5.2624	1.39833e-212	2.26465e-210
ENSG00000248672	LY75-CD302	-4.79367	2.16085e-75	1.18009e-73	-4.79367	2.82837e-78	1.68151e-76	-4.79367	1.65794e-72	1.01567e-70	-4.79367	4.46402e-57	2.80795e-55	-4.79367	5.6155e-60	3.4401e-58	-4.79367	4.81368e-58	2.76836e-56	-4.79367	1.73396e-183	1.12071e-181
ENSG00000248751	RP1-130H16.18	-3.41664	7.99744e-72	3.29485e-70	-3.41493	1.58079e-74	7.18497e-73	-3.40613	1.09177e-68	5.04363e-67	-3.40842	3.54592e-54	1.74084e-52	-3.40435	9.77746e-57	4.45839e-55	-3.39135	9.11805e-55	3.46289e-53	-3.41769	1.3102e-174	6.71297e-173
ENSG00000248871	TNFSF12-TNFSF13	-5.66967	1.05811e-77	7.06576e-76	-5.66967	1.13916e-80	7.79164e-79	-5.66967	9.87041e-75	7.24344e-73	-5.66967	7.53791e-59	5.71017e-57	-5.66967	7.79819e-62	5.69308e-60	-5.66967	7.61543e-60	5.31195e-58	-5.66967	5.42348e-189	4.06473e-187
ENSG00000248881	CTC-366B18.2	-2.08962	1.00592e-37	4.30543e-37	-2.08962	3.2951e-39	1.63998e-38	-2.08962	3.08145e-36	1.30815e-35	-2.08962	2.81807e-28	1.23389e-27	-2.08962	8.94456e-30	3.66363e-29	-2.08962	8.91499e-29	3.39309e-28	-2.08962	3.10422e-93	2.12014e-92
ENSG00000248919	ATP5J2-PTCD1	-3.34408	1.62634e-87	2.43778e-85	-3.37231	1.19537e-91	1.83074e-89	-3.37224	3.01731e-84	4.67186e-82	-3.37077	2.19409e-66	3.36029e-64	-3.36821	4.34529e-70	6.87922e-68	-3.37785	1.23295e-67	1.86798e-65	-3.31051	2.88578e-198	2.80418e-196
ENSG00000248993	XXbac-BPG181M17.5	-8.35756	6.09102e-99	3.73141e-96	-8.35756	1.09136e-102	5.69528e-100	-8.35756	3.41432e-95	2.18672e-92	-8.35756	3.72125e-75	2.38329e-72	-8.35756	6.40221e-79	3.92205e-76	-8.35756	2.06739e-76	1.16518e-73	-8.35756	1.47367e-239	9.43817e-237
ENSG00000248996	RP11-1334A24.6	-3.4358	4.16489e-44	2.53822e-43	-3.30751	1.27164e-43	8.17775e-43	-3.39512	2.32911e-37	1.05352e-36	-3.25639	9.02567e-30	4.36267e-29	-3.38966	9.51594e-34	5.12733e-33	-3.08445	1.62417e-27	5.74411e-27	-3.52786	7.65032e-93	5.17738e-92
ENSG00000249141	RP11-514O12.4	-9.20336	2.96055e-92	6.83838e-90	-9.18897	1.35062e-95	2.92772e-93	-8.70855	6.97664e-81	8.33058e-79	-8.67088	1.00044e-61	9.72156e-60	-8.68055	3.74214e-65	3.46886e-63	-8.80468	1.83556e-65	2.13744e-63	-9.18181	2.28033e-220	4.79551e-218
ENSG00000249209	AP000304.12	-5.71911	1.65857e-96	6.51442e-94	-5.71911	3.64928e-100	1.29017e-97	-5.71911	7.57093e-93	2.97328e-90	-5.71911	2.75904e-73	1.08279e-70	-5.71911	5.82929e-77	2.22618e-74	-5.71911	1.64146e-74	5.798e-72	-5.71911	9.17603e-234	3.43109e-231
ENSG00000249240	AC069368.3	-4.63124	7.75938e-84	8.47517e-82	-4.70141	2.65806e-89	3.34394e-87	-4.46064	1.86357e-71	1.07175e-69	-4.52073	1.64498e-60	1.43072e-58	-4.46724	7.76869e-61	5.11499e-59	-4.58501	1.79208e-61	1.44288e-59	-4.60913	3.63381e-188	2.62566e-186
ENSG00000249274	PDLIM1P4	-2.7899	1.87631e-41	9.76263e-41	-2.89365	3.86816e-45	2.75125e-44	-2.16333	2.37867e-27	6.57295e-27	-2.22156	1.44044e-22	4.38261e-22	-2.05511	2.13066e-22	5.71394e-22	-2.5119	3.84998e-27	1.32502e-26	-2.73788	2.16542e-93	1.48255e-92
ENSG00000249279	CTC-436P18.3	-2.24058	7.64595e-34	2.70886e-33	-2.19231	3.78325e-34	1.44578e-33	-2.00542	1.30157e-27	3.63799e-27	-2.04473	3.31023e-22	9.88161e-22	-2.03672	1.50155e-23	4.27274e-23	-2.12548	3.47392e-24	1.0111e-23	-2.22486	2.0468e-82	1.09489e-81
ENSG00000249319	AC068533.7	-4.18883	2.85622e-92	6.70735e-90	-4.18883	8.98406e-96	2.0417e-93	-4.18883	9.12003e-89	2.29466e-86	-4.18883	4.93969e-70	1.26546e-67	-4.18883	1.49214e-73	3.50404e-71	-4.18883	3.31074e-71	7.40449e-69	-4.18883	1.10607e-223	2.68699e-221
ENSG00000249437	NAIP	-2.36586	3.91149e-54	4.34644e-53	-2.31497	2.59068e-52	2.86296e-51	-2.18489	1.66238e-44	1.1299e-43	-2.16192	3.70187e-34	2.47084e-33	-2.09442	2.79339e-34	1.56621e-33	-2.28001	3.18314e-38	2.33596e-37	-2.3973	7.81095e-129	1.25064e-127
ENSG00000249532	RP11-148B6.1	-3.80771	1.73941e-60	2.94571e-59	-3.81774	6.75344e-63	1.49147e-61	-3.38528	6.5805e-47	5.26515e-46	-3.48017	5.09995e-39	5.27982e-38	-3.40937	3.6841e-40	3.24026e-39	-3.69678	2.75017e-44	3.41108e-43	-3.84191	1.27513e-144	3.09236e-143
ENSG00000249624	AP000295.9	-5.25905	1.12129e-87	1.69882e-85	-5.25905	5.19743e-91	7.54967e-89	-5.25905	2.42956e-84	3.80361e-82	-5.25905	1.6633e-66	2.60399e-64	-5.25905	7.40507e-70	1.12191e-67	-5.25905	1.26866e-67	1.90165e-65	-5.25905	9.5257e-213	1.56066e-210
ENSG00000249709	ZNF564	-2.71231	6.90259e-52	6.68896e-51	-2.89271	8.54295e-57	1.27107e-55	-2.38463	3.35358e-42	1.98538e-41	-2.3789	1.06151e-32	6.36183e-32	-2.32245	6.47699e-35	3.79937e-34	-2.52462	6.41432e-37	4.24907e-36	-2.77074	4.05508e-122	5.43119e-121
ENSG00000249884	RNF103-CHMP3	-4.71311	8.09173e-81	6.90985e-79	-4.75412	1.94546e-84	1.6613e-82	-4.44985	1.52285e-71	8.79381e-70	-4.46863	2.50075e-57	1.60893e-55	-4.45542	2.6437e-58	1.39512e-56	-4.48002	1.33391e-57	7.11926e-56	-4.68736	9.57401e-186	6.58038e-184
ENSG00000249971	RP11-256P1.1	-5.4593	4.25002e-75	2.27691e-73	-5.4593	5.70289e-78	3.27974e-76	-5.4593	3.18082e-72	1.89906e-70	-5.4593	7.50069e-57	4.65572e-55	-5.4593	9.67312e-60	5.82454e-58	-5.4593	8.15557e-58	4.47128e-56	-5.4593	8.69287e-183	5.51723e-181
ENSG00000250021	C15orf38-AP3S2	-3.74705	9.38077e-76	5.30823e-74	-3.74705	1.19079e-78	7.20095e-77	-3.74705	7.42159e-73	4.6289e-71	-3.74705	2.3534e-57	1.52107e-55	-3.74705	2.87101e-60	1.79789e-58	-3.74644	2.55733e-58	1.50765e-56	-3.74705	2.37358e-184	1.56279e-182
ENSG00000250135	RP4-622L5.2	-2.06581	1.47823e-46	1.03315e-45	-2.06581	2.25365e-48	1.95168e-47	-2.06581	9.73297e-45	6.71913e-44	-2.06581	5.31596e-35	3.82738e-34	-2.06581	7.82565e-37	5.27324e-36	-2.06581	1.30162e-35	7.81083e-35	-2.06581	1.53269e-114	1.70582e-113
ENSG00000250151	ARPC4-TTLL3	-4.92697	5.09109e-90	9.08019e-88	-4.93455	1.46664e-93	2.5718e-91	-4.93113	1.41716e-86	2.69605e-84	-4.93014	2.83611e-68	5.12318e-66	-4.93359	8.46563e-72	1.56948e-69	-4.93579	1.52491e-69	2.78296e-67	-4.93028	5.43238e-218	9.94055e-216
ENSG00000250186	RP11-1079K10.4	-4.09659	4.42053e-76	2.55268e-74	-4.09659	5.45841e-79	3.31504e-77	-4.09659	3.59533e-73	2.27167e-71	-4.09659	1.32127e-57	8.61882e-56	-4.09659	1.56789e-60	9.95113e-59	-4.09659	1.39732e-58	8.37797e-57	-4.09659	3.95091e-185	2.62586e-183
ENSG00000250349	TM4SF2	-4.22265	8.15824e-44	4.88109e-43	-4.22265	1.5754e-45	1.13949e-44	-4.22265	4.24042e-42	2.49468e-41	-4.22265	6.54714e-33	3.97969e-32	-4.22265	1.22192e-34	7.02439e-34	-4.22265	1.73507e-33	8.9912e-33	-4.22265	6.07854e-108	5.77912e-107
ENSG00000250413	RP11-448G15.1	-3.33102	4.98767e-34	1.78366e-33	-3.22145	9.9955e-34	3.73969e-33	-2.99744	3.24802e-27	8.90881e-27	-2.97727	8.35752e-21	2.29771e-20	-3.03729	2.04571e-23	5.76942e-23	-3.09628	1.43823e-23	4.04888e-23	-3.28807	7.21491e-81	3.74707e-80
ENSG00000250506	CDK3	-2.21238	3.0141e-48	2.33987e-47	-2.25205	6.56027e-51	6.60244e-50	-2.26505	1.1223e-46	8.82433e-46	-2.26289	1.34735e-36	1.11409e-35	-2.27685	7.54299e-39	5.97083e-38	-2.27099	1.09928e-37	7.73667e-37	-2.32741	1.94517e-122	2.63027e-121
ENSG00000250604	RP11-597D13.8	-5.09689	1.05111e-60	1.79735e-59	-5.09689	4.78043e-63	1.06073e-61	-5.09689	2.32069e-58	4.21374e-57	-5.09689	8.10783e-46	1.62503e-44	-5.09689	3.54928e-48	6.47789e-47	-5.09689	1.32495e-46	2.04028e-45	-5.09689	1.92305e-148	5.16111e-147
ENSG00000250644	RP11-295K3.1	-8.26666	1.60698e-82	1.54029e-80	-8.26666	1.15132e-85	1.08147e-83	-8.26666	2.25265e-79	2.3511e-77	-8.26666	1.51094e-62	1.61282e-60	-8.26666	1.03995e-65	1.05416e-63	-8.26666	1.33259e-63	1.3039e-61	-8.26666	1.80454e-200	1.91173e-198
ENSG00000250722	SEPP1	-3.25525	4.19391e-29	1.19717e-28	-2.45111	6.50679e-19	1.28117e-18	-2.59978	9.02108e-34	3.34933e-33	-2.38806	2.10348e-20	5.66152e-20	-2.28861	1.26733e-20	3.10389e-20	-2.23278	1.16929e-22	3.14175e-22	-4.31029	7.78214e-100	6.12572e-99
ENSG00000250742	RP11-834C11.4	-4.29597	8.52006e-57	1.13253e-55	-3.85762	1.78574e-48	1.55411e-47	-3.97325	3.22819e-49	3.01226e-48	-3.82557	1.03571e-35	7.91388e-35	-3.81104	4.7917e-40	4.17791e-39	-3.75235	1.52971e-38	1.1526e-37	-4.12218	3.68341e-114	4.06097e-113
ENSG00000250771	RP11-153M7.3	-3.08966	1.11431e-42	6.20821e-42	-2.83308	5.73036e-35	2.29834e-34	-2.54835	1.52966e-28	4.47805e-28	-2.53555	1.41332e-22	4.30379e-22	-2.49535	5.86249e-25	1.79923e-24	-2.67274	1.05262e-26	3.52792e-26	-2.8533	1.14249e-80	5.91827e-80
ENSG00000251139	RP11-701P16.2	-4.74304	5.15577e-47	3.69694e-46	-4.65628	1.35934e-46	1.05179e-45	-3.48945	2.73351e-29	8.25797e-29	-3.65319	4.74851e-23	1.48615e-22	-3.29788	2.29096e-21	5.8057e-21	-4.01759	9.78038e-29	3.71143e-28	-4.66242	6.79209e-108	6.44883e-107
ENSG00000251143	RP11-849H4.4	-2.91652	1.74124e-43	1.02183e-42	-3.3356	5.50675e-52	5.96388e-51	-3.17379	8.83631e-47	7.00246e-46	-3.16361	2.75618e-35	2.03216e-34	-3.14162	2.98724e-38	2.24961e-37	-3.25495	7.52048e-38	5.36253e-37	-3.45346	6.10252e-126	9.08927e-125
ENSG00000251184	RP11-101E3.5	-2.90105	6.52146e-65	1.4941e-63	-2.90105	2.07442e-67	6.06402e-66	-2.90105	2.05875e-62	5.19853e-61	-2.90105	4.84985e-49	1.38049e-47	-2.90105	1.48406e-51	3.8509e-50	-2.90105	7.03362e-50	1.51535e-48	-2.90105	1.71553e-158	5.71439e-157
ENSG00000251201	TMED7-TICAM2	-2.43953	2.36235e-36	9.45343e-36	-2.44221	8.06065e-38	3.74093e-37	-2.38403	4.24356e-34	1.60774e-33	-2.40526	8.0635e-27	3.18874e-26	-2.37643	6.36162e-28	2.31676e-27	-2.42874	1.34812e-27	4.79187e-27	-2.44763	3.86781e-90	2.47603e-89
ENSG00000251357	AP000350.10	-5.46458	1.21722e-82	1.18281e-80	-5.46458	8.63237e-86	8.27416e-84	-5.46458	1.72378e-79	1.84001e-77	-5.46458	1.22081e-62	1.32317e-60	-5.46458	8.31735e-66	8.55412e-64	-5.46458	1.07305e-63	1.06474e-61	-5.46458	9.31244e-201	1.00162e-198
ENSG00000251920	RNA5SP216	-2.81077	9.29794e-50	7.91589e-49	-2.81077	1.0767e-51	1.13723e-50	-2.81077	8.06058e-48	6.8666e-47	-2.81077	1.91395e-37	1.70897e-36	-2.81077	2.13811e-39	1.76795e-38	-2.81077	4.2744e-38	3.10445e-37	-2.81077	3.12871e-122	4.21449e-121
ENSG00000251992	SCARNA17	-3.62698	1.35498e-53	1.46409e-52	-3.62698	1.12981e-55	1.54854e-54	-3.62698	1.63151e-51	1.76831e-50	-3.62698	2.23934e-40	2.61845e-39	-3.62698	1.7996e-42	1.95199e-41	-3.62698	4.48097e-41	4.18125e-40	-3.62698	1.97825e-131	3.37045e-130
ENSG00000252139	SCARNA18	-3.00714	2.99373e-36	1.19292e-35	-3.00714	1.11535e-37	5.12901e-37	-3.00714	8.06255e-35	3.18033e-34	-3.00714	3.70321e-27	1.50024e-26	-3.00714	1.33783e-28	5.09184e-28	-3.00714	1.22319e-27	4.35771e-27	-3.00714	1.15621e-89	7.29555e-89
ENSG00000252714	RNA5SP392	-2.52197	5.35065e-37	2.20634e-36	-2.52197	1.86733e-38	8.90076e-38	-2.52197	1.5384e-35	6.29752e-35	-2.52197	1.00246e-27	4.23273e-27	-2.52197	3.39108e-29	1.33876e-28	-2.52197	3.23937e-28	1.19203e-27	-2.52197	1.77904e-91	1.16806e-90
ENSG00000252809	AC135050.1	-3.99231	1.54854e-63	3.2134e-62	-3.99231	5.53612e-66	1.50008e-64	-3.99231	4.34956e-61	9.77437e-60	-3.99231	5.49265e-48	1.41743e-46	-3.99231	1.88934e-50	4.3498e-49	-3.99231	8.28266e-49	1.61862e-47	-3.99231	3.3035e-155	1.03436e-153
ENSG00000253200	RP11-582J16.5	-2.47199	2.35801e-52	2.35466e-51	-2.85615	4.32835e-65	1.10084e-63	-2.59217	1.05554e-48	9.48501e-48	-2.53292	3.20696e-37	2.7979e-36	-2.51353	1.90974e-42	2.06986e-41	-2.53836	3.08697e-40	2.67335e-39	-2.50762	3.93324e-97	2.91681e-96
ENSG00000253214	RP11-1149M10.2	-2.44778	6.53506e-49	5.26166e-48	-2.22683	1.3373e-43	8.57647e-43	-2.20901	1.03068e-40	5.6507e-40	-2.16805	1.76138e-30	8.99197e-30	-2.09475	2.31355e-31	1.05392e-30	-2.20693	2.70131e-33	1.38255e-32	-2.3294	2.22816e-109	2.17717e-108
ENSG00000253295	RP11-779O18.1	-2.28972	1.11136e-34	4.12948e-34	-2.3526	2.30814e-37	1.04169e-36	-2.28859	9.08545e-32	3.06254e-31	-2.27293	1.56002e-23	5.01271e-23	-2.36727	1.71399e-28	6.47803e-28	-2.36595	1.433e-27	5.08334e-27	-2.35397	1.09297e-87	6.56155e-87
ENSG00000253356	RP11-90P5.2	-3.59558	4.87267e-78	3.34907e-76	-3.59616	5.61157e-81	3.89493e-79	-3.55577	1.29045e-69	6.31333e-68	-3.57746	2.81199e-57	1.7928e-55	-3.57838	7.99996e-61	5.24276e-59	-3.58392	1.72883e-59	1.14362e-57	-3.58574	1.10413e-185	7.55203e-184
ENSG00000253374	RP11-257P3.3	-2.4551	1.75033e-42	9.63366e-42	-2.39961	4.72856e-43	2.93374e-42	-2.33002	1.90527e-37	8.64858e-37	-2.29938	2.06138e-28	9.09357e-28	-2.32907	3.16851e-31	1.42542e-30	-2.38414	3.04787e-31	1.3458e-30	-2.46069	1.39602e-103	1.19792e-102
ENSG00000253389	RP11-930P14.1	-2.74979	8.58549e-27	2.19865e-26	-3.43089	5.83533e-37	2.58715e-36	-3.31141	1.3437e-32	4.70613e-32	-3.33712	1.2138e-25	4.47357e-25	-3.37695	1.44828e-27	5.15962e-27	-3.33811	2.38724e-26	7.85159e-26	-3.42348	3.9455e-87	2.34467e-86
ENSG00000253474	RP11-10H3.1	-3.44274	7.8167e-34	2.76727e-33	-3.40681	8.98328e-35	3.56347e-34	-3.33379	3.63891e-31	1.18878e-30	-3.30738	7.30544e-24	2.4005e-23	-3.33861	1.11973e-25	3.58731e-25	-3.34297	5.83502e-25	1.77303e-24	-3.42712	3.08316e-83	1.68379e-82
ENSG00000253722	RP11-10N23.4	-2.05128	3.37719e-46	2.30881e-45	-2.05128	5.31022e-48	4.48836e-47	-2.05128	2.15596e-44	1.45486e-43	-2.05128	9.98362e-35	6.99847e-34	-2.05128	1.51597e-36	9.98596e-36	-2.05128	2.4699e-35	1.44943e-34	-2.05128	1.11757e-113	1.21595e-112
ENSG00000253859	RP11-157I4.4	-3.04486	3.49543e-47	2.54525e-46	-3.02456	1.21692e-48	1.07098e-47	-2.70888	1.03171e-34	4.04026e-34	-2.74481	1.10872e-29	5.33714e-29	-2.72469	2.33231e-31	1.06213e-30	-2.84445	1.97249e-31	8.823e-31	-2.99802	3.50312e-111	3.56383e-110
ENSG00000253988	RP11-489O18.1	-5.6647	2.09941e-64	4.63646e-63	-5.09922	1.09457e-54	1.40205e-53	-5.4124	2.06802e-56	3.20908e-55	-5.41501	5.91481e-45	1.08657e-43	-5.24186	6.80151e-45	9.23249e-44	-5.46257	4.96252e-47	7.89187e-46	-5.14609	3.86232e-106	3.49743e-105
ENSG00000254003	CTB-167B5.1	-2.8416	2.58825e-48	2.01706e-47	-3.07924	1.63226e-55	2.20927e-54	-2.35374	1.95244e-38	9.38904e-38	-2.42526	1.02339e-30	5.29064e-30	-2.34326	7.11442e-29	2.75391e-28	-2.60687	1.458e-32	7.04261e-32	-3.2114	9.61715e-129	1.53809e-127
ENSG00000254040	RP11-421P23.2	-4.58404	7.07233e-43	3.99555e-42	-4.25693	1.26843e-40	6.82928e-40	-3.31808	8.06794e-27	2.17329e-26	-3.25471	1.10609e-19	2.86644e-19	-3.2857	8.28673e-22	2.14554e-21	-3.7013	1.44735e-25	4.54696e-25	-3.4425	7.77338e-61	2.60159e-60
ENSG00000254054	RP11-156K13.3	-3.90363	2.45069e-35	9.3705e-35	-3.52377	2.01468e-32	7.09492e-32	-3.56533	1.10251e-30	3.52015e-30	-3.50107	5.87069e-23	1.8248e-22	-3.47679	2.64008e-24	7.84948e-24	-3.63569	7.73038e-25	2.33536e-24	-3.53064	2.33917e-69	9.44923e-69
ENSG00000254144	RP11-661A12.4	-2.0818	8.83645e-38	3.79128e-37	-2.07993	3.26954e-39	1.62784e-38	-2.07556	5.59763e-36	2.34177e-35	-2.0818	2.5539e-28	1.12031e-27	-2.07386	1.54069e-29	6.23803e-29	-2.0818	8.06599e-29	3.07827e-28	-2.07596	2.03117e-92	1.35958e-91
ENSG00000254341	SNORD87	-3.69392	6.92472e-63	1.37228e-61	-3.69392	2.61628e-65	6.76392e-64	-3.69392	1.84043e-60	3.8995e-59	-3.69392	1.73038e-47	4.26243e-46	-3.69392	6.29082e-50	1.3721e-48	-3.69392	2.65793e-48	4.86999e-47	-3.69392	1.18179e-153	3.58868e-152
ENSG00000254400	RP11-732A19.8	-3.96393	3.39588e-78	2.35704e-76	-3.96393	3.50657e-81	2.47038e-79	-3.95955	8.5838e-75	6.33224e-73	-3.96393	3.1514e-59	2.46684e-57	-3.96393	3.12686e-62	2.34349e-60	-3.96393	3.13979e-60	2.28039e-58	-3.96393	3.61666e-190	2.75453e-188
ENSG00000254413	CHKB-CPT1B	-3.16922	2.02412e-67	5.73841e-66	-3.28224	2.45042e-73	1.04944e-71	-3.2436	1.23346e-66	4.7485e-65	-3.21109	1.59366e-51	5.89362e-50	-3.23713	1.16559e-54	4.34791e-53	-3.20026	2.55551e-52	7.2595e-51	-3.28871	2.1297e-171	1.02765e-169
ENSG00000254415	SIGLEC14	-4.83709	3.22212e-68	9.74241e-67	-4.36128	9.83839e-50	9.29731e-49	-4.53117	1.87104e-55	2.7039e-54	-4.36043	4.46344e-42	6.12364e-41	-4.36399	3.18966e-43	3.68078e-42	-4.28823	5.72738e-41	5.28479e-40	-4.53755	3.70541e-120	4.73339e-119
ENSG00000254452	RP11-867G23.4	-2.18168	7.03597e-46	4.72305e-45	-2.18168	1.13711e-47	9.38048e-47	-2.18168	4.37002e-44	2.88536e-43	-2.18168	1.74749e-34	1.20049e-33	-2.18168	2.7276e-36	1.75809e-35	-2.18168	4.3631e-35	2.51436e-34	-2.18168	6.53075e-113	6.97108e-112
ENSG00000254462	TMX2-CTNND1	-4.65559	2.15675e-79	1.64263e-77	-4.65559	2.01269e-82	1.50047e-80	-4.65559	2.32107e-76	1.92375e-74	-4.65559	3.80028e-60	3.1684e-58	-4.65559	3.40752e-63	2.77526e-61	-4.65559	3.66059e-61	2.83394e-59	-4.65559	5.085e-193	4.07089e-191
ENSG00000254501	AP003068.9	-2.78279	5.75815e-58	8.27037e-57	-2.78279	3.30638e-60	6.10575e-59	-2.78279	1.00689e-55	1.49023e-54	-2.78279	1.01313e-43	1.65029e-42	-2.78279	5.60203e-46	8.36151e-45	-2.78279	1.7897e-44	2.27384e-43	-2.78279	6.78743e-142	1.52043e-140
ENSG00000254505	CHMP4A	-3.54382	1.52191e-67	4.36734e-66	-4.0032	1.99621e-79	1.25565e-77	-3.99307	2.87673e-65	9.67377e-64	-3.91631	4.17989e-50	1.31755e-48	-3.90487	7.31126e-54	2.52489e-52	-4.02623	1.22064e-53	4.03727e-52	-3.14468	8.02326e-89	4.93013e-88
ENSG00000254536	RP11-108K14.8	-3.90284	2.9544e-82	2.77517e-80	-3.91656	8.28242e-86	7.9931e-84	-3.94127	1.88815e-79	2.0003e-77	-3.93782	1.68337e-62	1.77473e-60	-3.94214	3.7116e-66	4.0228e-64	-3.90391	5.7771e-63	5.28567e-61	-3.9224	7.12137e-198	6.77974e-196
ENSG00000254559	RP11-304M2.5	-4.05345	5.35169e-72	2.23093e-70	-4.05345	9.33585e-75	4.3994e-73	-4.05345	3.08085e-69	1.46159e-67	-4.05345	1.79121e-54	9.01362e-53	-4.05345	3.0038e-57	1.42985e-55	-4.05345	2.1258e-55	8.70713e-54	-4.05345	2.13413e-175	1.11784e-173
ENSG00000254578	CTD-2517M22.16	-3.44659	3.91912e-56	4.98829e-55	-3.44659	2.63099e-58	4.31055e-57	-3.44659	5.8615e-54	7.61185e-53	-3.44659	2.56045e-42	3.59689e-41	-3.44659	1.65579e-44	2.16388e-43	-3.44659	4.76548e-43	5.24166e-42	-3.44659	1.64876e-137	3.27659e-136
ENSG00000254612	RP11-676M6.1	-3.04676	1.5104e-41	7.90547e-41	-3.12039	1.97276e-49	1.82271e-48	-3.76457	1.45559e-56	2.27881e-55	-3.79295	4.99488e-48	1.29609e-46	-3.84377	1.78633e-51	4.58458e-50	-3.72996	3.1013e-46	4.65857e-45	-3.42183	5.17174e-93	3.51519e-92
ENSG00000254641	RP11-732A19.2	-5.2573	3.36199e-92	7.64039e-90	-5.2573	1.06383e-95	2.34209e-93	-5.2573	1.0671e-88	2.63781e-86	-5.2573	5.59847e-70	1.40861e-67	-5.2573	1.70127e-73	3.92966e-71	-5.2573	3.75975e-71	8.27733e-69	-5.2573	1.63043e-223	3.8937e-221
ENSG00000254665	RP11-152H18.3	-2.40018	2.30679e-49	1.91756e-48	-2.40018	2.76323e-51	2.84813e-50	-2.40018	1.93323e-47	1.60419e-46	-2.40018	3.83091e-37	3.32374e-36	-2.40018	4.42739e-39	3.56672e-38	-2.40018	8.65294e-38	6.13588e-37	-2.40018	2.77054e-121	3.6415e-120
ENSG00000254673	RP11-598P20.5	-5.65184	1.70752e-85	2.12911e-83	-5.65184	9.51637e-89	1.10815e-86	-5.65184	3.07706e-82	4.05194e-80	-5.65184	7.88161e-65	1.02826e-62	-5.65184	4.21934e-68	5.3559e-66	-5.65184	6.39267e-66	7.69852e-64	-5.65184	1.49754e-207	1.95373e-205
ENSG00000254693	RP11-58K22.5	-2.28439	4.13786e-34	1.48617e-33	-2.23511	2.56238e-34	9.88606e-34	-2.13801	2.34679e-29	7.11408e-29	-2.09885	8.45983e-22	2.46076e-21	-2.07951	5.08581e-23	1.40895e-22	-2.15557	5.01691e-24	1.44883e-23	-2.27928	2.59149e-83	1.41858e-82
ENSG00000254701	RP11-1415C14.4	-2.61665	4.09025e-36	1.62251e-35	-2.50502	1.28774e-31	4.33657e-31	-2.17296	2.32263e-17	4.3117e-17	-2.11237	1.33689e-16	2.93363e-16	-2.15064	1.27155e-14	2.35925e-14	-2.11674	4.20734e-15	7.92215e-15	-2.565	5.41445e-73	2.36484e-72
ENSG00000254719	RP11-351I24.3	-3.38897	1.88624e-48	1.4831e-47	-3.10594	6.81043e-43	4.17213e-42	-3.33762	7.50198e-40	3.90335e-39	-3.40885	9.62419e-34	6.23757e-33	-3.30216	1.12876e-32	5.64381e-32	-3.47447	8.6383e-37	5.65847e-36	-3.26166	1.20779e-91	7.95222e-91
ENSG00000254721	RP11-805J14.5	-2.26686	1.18213e-42	6.57566e-42	-2.26686	2.5237e-44	1.69328e-43	-2.26686	5.55746e-41	3.09749e-40	-2.26686	5.01779e-32	2.84395e-31	-2.26686	1.03579e-33	5.56183e-33	-2.26686	1.37522e-32	6.66787e-32	-2.26686	3.81734e-105	3.37854e-104
ENSG00000254732	RP11-691N7.6	-5.37869	1.29159e-80	1.08324e-78	-5.41978	4.84136e-84	4.00674e-82	-4.87139	2.07751e-58	3.78682e-57	-5.01917	1.08123e-49	3.27626e-48	-4.89112	2.50353e-52	7.01286e-51	-5.23359	3.28542e-56	1.4603e-54	-5.08612	2.53485e-160	8.73254e-159
ENSG00000254741	RP11-661A12.7	-5.09264	9.79837e-88	1.50064e-85	-5.09264	4.51936e-91	6.6331e-89	-5.09264	2.13359e-84	3.37778e-82	-5.09264	1.49971e-66	2.37426e-64	-5.09264	6.64383e-70	1.01752e-67	-5.09264	1.142e-67	1.749e-65	-5.09264	6.90995e-213	1.14543e-210
ENSG00000254760	CTD-2616J11.3	-5.78035	3.1984e-88	5.12108e-86	-5.67274	4.86269e-84	4.00674e-82	-5.62358	1.3789e-73	9.07881e-72	-5.63195	7.54104e-62	7.4303e-60	-5.63707	9.97051e-63	7.8483e-61	-5.66827	4.31744e-64	4.53976e-62	-5.75225	9.91127e-202	1.10833e-199
ENSG00000254772	EEF1G	-5.43513	4.47643e-94	1.37115e-91	-5.43548	1.19707e-97	3.42141e-95	-5.43548	1.64902e-90	5.05102e-88	-5.43548	2.01621e-71	6.45646e-69	-5.43548	5.228e-75	1.56729e-72	-5.43548	1.28427e-72	3.54812e-70	-5.43548	5.47378e-228	1.67664e-225
ENSG00000254788	CKLF-CMTM1	-5.11121	7.6931e-68	2.28202e-66	-5.11508	1.72198e-70	6.15803e-69	-4.96839	5.50301e-63	1.4439e-61	-5.00177	3.77577e-50	1.19552e-48	-5.0017	1.58871e-52	4.53136e-51	-4.98977	6.00861e-51	1.4472e-49	-5.12553	8.30009e-166	3.36058e-164
ENSG00000254806	SYS1-DBNDD2	-5.30123	2.33989e-58	3.42358e-57	-5.0427	1.62607e-51	1.70091e-50	-5.03607	1.44646e-52	1.70836e-51	-5.07165	1.83821e-41	2.4004e-40	-4.97678	4.98971e-43	5.66976e-42	-5.19913	4.27475e-43	4.71662e-42	-5.18574	7.93934e-132	1.37596e-130
ENSG00000254835	RNF185-AS1	-3.4238	1.62094e-78	1.17727e-76	-3.4238	1.62894e-81	1.17101e-79	-3.4238	1.61992e-75	1.26103e-73	-3.4238	1.78663e-59	1.43849e-57	-3.4238	1.7252e-62	1.33561e-60	-3.4238	1.764e-60	1.31507e-58	-3.4238	6.21019e-191	4.83434e-189
ENSG00000254870	ATP6V1G2-DDX39B	-4.13676	1.43756e-85	1.8085e-83	-4.13676	7.96143e-89	9.34805e-87	-4.13676	2.60698e-82	3.46531e-80	-4.13676	6.9062e-65	9.09424e-63	-4.13676	3.67389e-68	4.70592e-66	-4.13676	5.58975e-66	6.78962e-64	-4.13676	9.94089e-208	1.30904e-205
ENSG00000254873	RP11-770J1.5	-4.20276	5.14236e-79	3.81347e-77	-4.27472	4.17009e-84	3.49741e-82	-4.20125	3.48942e-76	2.82563e-74	-4.2127	2.03932e-59	1.63261e-57	-4.18715	2.06863e-62	1.57552e-60	-4.21177	2.17732e-61	1.74309e-59	-4.26425	8.87618e-195	7.40032e-193
ENSG00000254893	RP11-466P24.2	-4.23364	1.43006e-69	4.85531e-68	-4.04515	1.31774e-65	3.48348e-64	-4.42874	6.52491e-68	2.88201e-66	-4.33686	3.46015e-52	1.39555e-50	-4.39182	6.97847e-52	1.85173e-50	-4.43819	4.92103e-56	2.14004e-54	-4.33473	7.71067e-144	1.8321e-142
ENSG00000254928	RP11-702H23.6	-3.02338	8.21322e-50	7.01359e-49	-3.02338	9.46705e-52	1.00294e-50	-3.02338	7.1532e-48	6.1121e-47	-3.02338	1.74095e-37	1.56043e-36	-3.02338	1.93585e-39	1.60353e-38	-3.02338	3.88203e-38	2.8253e-37	-3.02338	2.32311e-122	3.13231e-121
ENSG00000254929	RP11-144G6.12	-3.14452	3.9822e-51	3.67688e-50	-3.16778	2.03945e-53	2.41073e-52	-2.8758	3.33462e-43	2.09473e-42	-2.91283	5.89537e-35	4.22082e-34	-2.86885	3.83175e-36	2.44075e-35	-2.96991	1.41329e-36	9.10449e-36	-3.13728	4.63457e-122	6.19555e-121
ENSG00000254979	RP11-872D17.8	-4.38684	5.17535e-63	1.03287e-61	-4.38742	1.91103e-65	5.01424e-64	-4.37708	2.10438e-60	4.42548e-59	-4.38117	1.58773e-47	3.93166e-46	-4.38718	4.97143e-50	1.10137e-48	-4.3858	2.16905e-48	4.03191e-47	-4.38667	6.28143e-154	1.92822e-152
ENSG00000254995	STX16-NPEPL1	-2.24516	9.46101e-36	3.69575e-35	-3.07568	2.4747e-56	3.55801e-55	-2.89541	5.33648e-47	4.29418e-46	-2.82187	1.04535e-36	8.74643e-36	-2.74761	4.62184e-41	4.41204e-40	-2.85742	7.06534e-37	4.66061e-36	-3.03224	4.09952e-92	2.73237e-91
ENSG00000254996	ANKHD1-EIF4EBP3	-3.2469	1.69319e-71	6.77758e-70	-3.58953	4.48834e-81	3.13073e-79	-3.21714	1.94493e-63	5.30059e-62	-3.28696	1.79311e-51	6.57942e-50	-3.16929	1.82445e-53	6.00621e-52	-3.44658	1.38612e-55	5.74424e-54	-3.57351	3.19122e-183	2.05317e-181
ENSG00000255031	RP11-802E16.3	-3.52354	9.4327e-53	9.73676e-52	-3.59586	1.44443e-55	1.96448e-54	-3.66447	1.77991e-52	2.08297e-51	-3.60139	2.28384e-39	2.43046e-38	-3.67962	8.91882e-44	1.07961e-42	-3.61073	2.12465e-41	2.02821e-40	-3.44491	1.76234e-109	1.7268e-108
ENSG00000255054	RP1-317E23.6	-2.88532	9.17001e-61	1.57184e-59	-2.88532	4.14952e-63	9.23645e-62	-2.88532	2.03483e-58	3.71384e-57	-2.88532	7.30309e-46	1.47211e-44	-2.88532	3.18089e-48	5.85866e-47	-2.88532	1.19144e-46	1.84476e-45	-2.88532	1.38778e-148	3.73878e-147
ENSG00000255072	PIGY	-6.06498	3.90074e-67	1.08619e-65	-6.06498	1.02748e-69	3.46344e-68	-6.06498	1.48711e-64	4.65631e-63	-6.06498	9.58838e-51	3.2476e-49	-6.06498	2.42902e-53	7.88593e-52	-6.06498	1.30571e-51	3.41326e-50	-6.06498	8.47178e-164	3.2614e-162
ENSG00000255080	RP11-1082L8.3	-2.97187	7.6362e-57	1.02082e-55	-2.80689	6.75655e-53	7.6836e-52	-2.72932	1.11395e-43	7.1833e-43	-2.6991	4.1826e-35	3.03778e-34	-2.65574	2.87972e-36	1.85022e-35	-2.71185	7.78909e-37	5.11885e-36	-2.8124	1.36678e-112	1.45015e-111
ENSG00000255114	RP11-110I1.6	-2.37118	1.20464e-49	1.01942e-48	-2.37118	1.40849e-51	1.47992e-50	-2.37118	1.0343e-47	8.75273e-47	-2.37118	2.33254e-37	2.05924e-36	-2.37118	2.63105e-39	2.16035e-38	-2.37118	5.22606e-38	3.77229e-37	-2.37118	5.82514e-122	7.77237e-121
ENSG00000255154	RPP14	-3.57252	2.48381e-86	3.43107e-84	-3.58085	6.04882e-90	7.81908e-88	-3.40983	7.26782e-74	4.97105e-72	-3.42585	7.06097e-58	4.82957e-56	-3.40194	5.87435e-62	4.33348e-60	-3.53663	5.8897e-65	6.58618e-63	-3.57189	5.7746e-199	5.77051e-197
ENSG00000255185	PDXDC2P	-2.85129	9.04072e-66	2.23873e-64	-2.89418	4.54952e-69	1.47025e-67	-2.64729	2.98039e-57	4.94625e-56	-2.66806	5.56762e-46	1.1469e-44	-2.62706	1.06878e-46	1.71322e-45	-2.75977	3.50825e-48	6.31306e-47	-2.73121	7.31274e-139	1.50859e-137
ENSG00000255197	RP11-750H9.5	-2.41595	2.42693e-43	1.41245e-42	-2.81976	2.05182e-47	1.67304e-46	-3.40777	7.59883e-53	9.1746e-52	-3.27393	1.02581e-37	9.35515e-37	-3.39714	1.17762e-45	1.69833e-44	-3.22524	2.26787e-40	1.99216e-39	-2.60182	4.47338e-90	2.85721e-89
ENSG00000255252	RP1-65P5.3	-2.24433	4.16218e-27	1.08341e-26	-2.24433	3.481e-28	9.93062e-28	-2.24433	4.99047e-26	1.29854e-25	-2.24433	3.01754e-20	8.0525e-20	-2.24433	2.46113e-21	6.22797e-21	-2.24433	1.30775e-20	3.16168e-20	-2.24433	2.34894e-67	9.07251e-67
ENSG00000255292	SDHD	-4.47278	5.7824e-95	1.93986e-92	-4.47376	1.34914e-98	4.22431e-96	-4.44123	7.7577e-88	1.73501e-85	-4.4483	5.89734e-71	1.73112e-68	-4.46285	6.935e-75	1.99417e-72	-4.46435	5.6017e-73	1.61078e-70	-4.46645	2.89438e-228	9.26859e-226
ENSG00000255339	RP11-411B6.6	-5.27898	8.78801e-103	8.25487e-100	-5.27898	1.13896e-106	1.00299e-103	-5.27898	6.81035e-99	6.85413e-96	-5.27898	4.17669e-78	4.20354e-75	-5.27898	5.19739e-82	5.2308e-79	-5.27898	2.0829e-79	1.95654e-76	-5.27898	1.07157e-248	9.43647e-246
ENSG00000255432	RP11-831H9.11	-3.50784	2.32071e-79	1.758e-77	-3.50784	2.17153e-82	1.61036e-80	-3.50784	2.4908e-76	2.05236e-74	-3.50784	4.02008e-60	3.33194e-58	-3.50784	3.61432e-63	2.92677e-61	-3.50784	3.87579e-61	2.98414e-59	-3.50784	6.05468e-193	4.8198e-191
ENSG00000255439	RP11-196G11.1	-3.29211	1.42757e-77	9.39928e-76	-3.29211	1.55392e-80	1.0476e-78	-3.29211	1.31712e-74	9.56609e-73	-3.29211	9.4854e-59	7.14656e-57	-3.29211	9.92154e-62	7.16895e-60	-3.29211	9.61818e-60	6.64314e-58	-3.29211	1.10708e-188	8.20987e-187
ENSG00000255441	CTD-2616J11.2	-6.88663	1.8635e-97	8.75224e-95	-6.86527	1.03158e-100	4.15285e-98	-6.82327	8.96302e-91	2.93695e-88	-6.82046	4.60871e-72	1.58382e-69	-6.83288	6.40692e-76	2.14937e-73	-6.85005	2.64739e-74	9.09799e-72	-6.88293	6.41015e-235	2.73694e-232
ENSG00000255448	RP1-59M18.2	-2.385	7.72572e-57	1.03083e-55	-2.385	4.8837e-59	8.37121e-58	-2.385	1.22712e-54	1.67865e-53	-2.385	7.39068e-43	1.10899e-41	-2.385	4.49981e-45	6.18559e-44	-2.385	1.34817e-43	1.54941e-42	-2.385	3.38402e-139	7.04296e-138
ENSG00000255508	MIR3654	-4.24811	3.14111e-71	1.2226e-69	-4.4807	1.12178e-86	1.14536e-84	-4.51351	1.31694e-75	1.03663e-73	-4.4669	1.12715e-61	1.08778e-59	-4.52259	8.67079e-68	1.07168e-65	-4.45399	4.15451e-62	3.63585e-60	-4.51886	1.91214e-197	1.78424e-195
ENSG00000255526	NEDD8-MDP1	-4.72761	5.14559e-88	8.0557e-86	-4.72761	2.31794e-91	3.51181e-89	-4.72761	1.14722e-84	1.85797e-82	-4.72761	9.14645e-67	1.4813e-64	-4.72761	3.95735e-70	6.33625e-68	-4.72761	6.91024e-68	1.08184e-65	-4.72761	1.49132e-213	2.53165e-211
ENSG00000255629	RP11-196H14.3	-2.11651	3.07671e-45	1.99498e-44	-2.11651	5.25463e-47	4.17585e-46	-2.11651	1.80826e-43	1.15496e-42	-2.11651	5.38308e-34	3.55591e-33	-2.11651	8.8811e-36	5.55661e-35	-2.11651	1.36911e-34	7.66722e-34	-2.11651	2.27289e-111	2.31898e-110
ENSG00000255639	RP11-234B24.6	-4.93433	9.18432e-97	3.92143e-94	-4.93433	1.97751e-100	7.53056e-98	-4.93433	4.28417e-93	1.82921e-90	-4.93433	1.7524e-73	7.4822e-71	-4.93433	3.62314e-77	1.50147e-74	-4.93433	1.03507e-74	3.94166e-72	-4.93433	2.24822e-234	9.05071e-232
ENSG00000255663	RP11-212D19.4	-3.64915	5.55172e-82	5.04669e-80	-3.64457	7.94169e-85	6.99365e-83	-3.56891	2.90433e-73	1.87715e-71	-3.54329	2.21205e-56	1.32067e-54	-3.53698	1.48573e-59	8.7225e-58	-3.60982	8.51681e-61	6.45171e-59	-3.65307	9.22205e-199	9.08662e-197
ENSG00000255680	RP11-732A19.9	-4.71877	3.67852e-82	3.43247e-80	-4.71834	3.92974e-85	3.57226e-83	-4.6424	4.52574e-74	3.15682e-72	-4.62188	3.88025e-55	2.03244e-53	-4.69836	5.38424e-64	4.62585e-62	-4.67784	2.27169e-60	1.68464e-58	-4.7155	5.06069e-194	4.16989e-192
ENSG00000255723	RP11-529H2.2	-3.52833	1.39466e-55	1.70431e-54	-3.67508	2.14664e-61	4.31472e-60	-3.41861	1.80235e-47	1.49912e-46	-3.43179	8.46734e-39	8.51569e-38	-3.42876	1.61455e-40	1.46863e-39	-3.61074	7.13394e-43	7.69068e-42	-3.53896	8.56835e-121	1.1127e-119
ENSG00000255730	CTC-435M10.3	-4.90319	2.05839e-82	1.94649e-80	-4.90356	1.4716e-85	1.36413e-83	-4.9026	2.96775e-79	3.03011e-77	-4.90398	1.79616e-62	1.87466e-60	-4.9031	1.28085e-65	1.27093e-63	-4.90338	1.61129e-63	1.54443e-61	-4.89762	8.01803e-200	8.36845e-198
ENSG00000255750	RP11-283G6.5	-3.64078	7.45506e-61	1.29203e-59	-3.63191	4.6058e-63	1.02359e-61	-3.5122	2.85208e-55	4.05508e-54	-3.49376	1.32591e-42	1.93596e-41	-3.52073	8.88212e-46	1.2902e-44	-3.57569	9.17746e-46	1.3249e-44	-3.63359	4.62492e-148	1.23186e-146
ENSG00000255767	RP13-512J5.1	-2.99686	2.46733e-56	3.18067e-55	-2.99686	1.62823e-58	2.7022e-57	-2.99686	3.754e-54	4.93874e-53	-2.99686	1.79704e-42	2.57059e-41	-2.99686	1.14231e-44	1.51555e-43	-2.99686	3.32552e-43	3.70994e-42	-2.99686	5.4475e-138	1.09338e-136
ENSG00000255835	RP4-559A3.7	-3.43898	1.35652e-70	5.08332e-69	-3.43898	2.66519e-73	1.13795e-71	-3.43898	6.9336e-68	3.04344e-66	-3.43898	2.13727e-53	9.59047e-52	-3.43898	4.03717e-56	1.72779e-54	-3.43898	2.63917e-54	9.46206e-53	-3.43898	4.75353e-172	2.3256e-170
ENSG00000255857	PXN-AS1	-2.34444	9.22934e-42	4.89429e-41	-2.2821	1.14138e-41	6.50568e-41	-2.20323	2.48266e-39	1.25469e-38	-2.13573	1.15142e-28	5.17497e-28	-2.12718	1.09419e-29	4.46357e-29	-2.22842	4.64976e-32	2.1615e-31	-2.26516	1.73804e-85	9.96704e-85
ENSG00000255872	RP11-613M10.9	-3.27181	1.54708e-67	4.42157e-66	-3.26827	4.94928e-70	1.7092e-68	-3.14641	1.94683e-61	4.48296e-60	-3.12006	1.13432e-47	2.86425e-46	-3.11827	5.21131e-50	1.1509e-48	-3.1661	1.35221e-49	2.85219e-48	-3.19503	8.37026e-157	2.68038e-155
ENSG00000255949	AP003419.16	-3.00795	8.73653e-67	2.3764e-65	-3.00795	2.37063e-69	7.78607e-68	-3.00795	3.23321e-64	9.71342e-63	-3.00795	1.77904e-50	5.88418e-49	-3.00795	4.64288e-53	1.45052e-51	-3.00795	2.44677e-51	6.16726e-50	-3.00795	5.8032e-163	2.15177e-161
ENSG00000255958	RP11-656E20.5	-2.19674	2.88134e-43	1.66864e-42	-2.19674	5.83375e-45	4.08943e-44	-2.19674	1.42836e-41	8.17449e-41	-2.19674	1.71221e-32	1.00647e-31	-2.19674	3.35116e-34	1.86484e-33	-2.19674	4.61007e-33	2.31324e-32	-2.19674	1.27079e-106	1.16724e-105
ENSG00000255980	AP000439.1	-3.7673	3.84469e-40	1.87835e-39	-3.38321	5.14421e-36	2.18253e-35	-3.47216	4.58025e-35	1.83132e-34	-3.39289	9.56044e-27	3.76381e-26	-3.45153	8.37125e-29	3.22976e-28	-3.43297	1.30687e-27	4.64876e-27	-3.53937	3.68148e-87	2.18962e-86
ENSG00000256007	ARAP1-AS1	-6.03215	8.09452e-93	2.07367e-90	-6.04138	7.08317e-97	1.81458e-94	-6.03885	2.48549e-89	6.60764e-87	-6.03265	4.61073e-70	1.20306e-67	-6.04173	2.73666e-74	7.27538e-72	-6.04673	3.35447e-72	8.75269e-70	-6.04255	4.05641e-225	1.03918e-222
ENSG00000256028	RP11-197N18.2	-4.1603	2.28816e-80	1.87442e-78	-4.16076	1.9455e-83	1.54871e-81	-4.14881	4.14871e-77	3.63076e-75	-4.14115	1.09587e-60	9.7112e-59	-4.1532	6.84056e-64	5.77147e-62	-4.15074	8.08493e-62	6.86245e-60	-4.16185	2.23194e-195	1.9533e-193
ENSG00000256034	RP11-707G14.1	-4.52645	1.9734e-89	3.31014e-87	-4.52907	2.94625e-93	4.82705e-91	-4.52872	4.06471e-86	7.24958e-84	-4.5155	1.98504e-66	3.07354e-64	-4.52888	1.66111e-71	2.88951e-69	-4.53267	1.84552e-69	3.21028e-67	-4.53038	3.17737e-217	5.73964e-215
ENSG00000256100	AP000721.4	-4.17776	1.15957e-79	8.97708e-78	-4.17776	1.05774e-82	8.01266e-81	-4.17776	1.27666e-76	1.07153e-74	-4.17776	2.36042e-60	2.01565e-58	-4.17776	2.06877e-63	1.69471e-61	-4.17776	2.25644e-61	1.79623e-59	-4.17776	1.15954e-193	9.38962e-192
ENSG00000256116	RP11-783K16.14	-2.77548	2.20031e-58	3.22941e-57	-2.88249	3.26943e-64	7.82109e-63	-2.90491	9.28436e-59	1.75829e-57	-2.86008	2.35226e-44	4.09683e-43	-2.90555	3.05395e-48	5.6396e-47	-2.86352	5.44927e-46	8.03141e-45	-2.73163	1.56715e-122	2.12523e-121
ENSG00000256152	RP11-463O12.3	-4.24961	5.37462e-63	1.07112e-61	-4.24961	2.01173e-65	5.25885e-64	-4.24961	1.44187e-60	3.10168e-59	-4.24961	1.42505e-47	3.55379e-46	-4.24961	5.13246e-50	1.13527e-48	-4.24961	2.1821e-48	4.05082e-47	-4.24961	6.45174e-154	1.9762e-152
ENSG00000256210	AC005255.3	-2.25816	9.87801e-41	4.9566e-40	-2.1312	1.94486e-38	9.25468e-38	-2.24006	4.00246e-33	1.43864e-32	-2.24978	2.57773e-27	1.0549e-26	-2.2975	2.60668e-31	1.18249e-30	-2.29092	2.27626e-31	1.01271e-30	-2.28556	7.18358e-86	4.15845e-85
ENSG00000256349	CTD-3074O7.11	-2.4917	1.36654e-68	4.27879e-67	-2.4917	3.18163e-71	1.17662e-69	-2.4917	5.89421e-66	2.12403e-64	-2.4917	7.34324e-52	2.85031e-50	-2.4917	1.64403e-54	6.01673e-53	-2.4917	9.59622e-53	2.92664e-51	-2.4917	2.85187e-167	1.19237e-165
ENSG00000256500	RP11-73M18.2	-3.18794	1.39022e-54	1.58867e-53	-3.18794	1.06529e-56	1.57172e-55	-3.18794	1.82155e-52	2.12816e-51	-3.18794	3.92581e-41	4.96096e-40	-3.18794	2.89871e-43	3.35602e-42	-3.18794	7.63692e-42	7.60454e-41	-3.18794	8.46702e-134	1.53342e-132
ENSG00000256514	AP003419.11	-6.69672	4.90647e-91	9.73693e-89	-6.69672	1.71281e-94	3.26129e-92	-6.69672	1.4116e-87	3.05992e-85	-6.69672	4.38516e-69	9.50567e-67	-6.69672	1.47018e-72	3.04629e-70	-6.69672	3.043e-70	6.03885e-68	-6.69672	9.62033e-221	2.0538e-218
ENSG00000256566	RP4-734P14.4	-3.46603	3.5766e-76	2.09105e-74	-3.46603	4.38209e-79	2.68451e-77	-3.46603	2.93166e-73	1.8776e-71	-3.46603	1.12305e-57	7.3943e-56	-3.46603	1.32233e-60	8.46895e-59	-3.46603	1.18462e-58	7.1945e-57	-3.46603	2.38477e-185	1.60007e-183
ENSG00000256664	RP11-611O2.3	-4.29735	6.00717e-48	4.59506e-47	-4.29735	8.12577e-50	7.70991e-49	-4.29735	4.45801e-46	3.37524e-45	-4.29735	4.61425e-36	3.62806e-35	-4.29735	6.0243e-38	4.43019e-37	-4.29735	1.08548e-36	7.06764e-36	-4.29735	6.95334e-118	8.32392e-117
ENSG00000256690	RP11-727F15.9	-2.80386	1.46845e-59	2.33263e-58	-2.99827	1.11979e-67	3.30771e-66	-2.96968	4.10395e-61	9.23716e-60	-2.97337	1.27706e-47	3.19605e-46	-2.9719	4.29558e-51	1.0526e-49	-2.98056	1.0276e-47	1.75324e-46	-2.96879	1.09093e-144	2.65021e-143
ENSG00000256745	RP11-680H20.1	-3.4957	8.99045e-72	3.69316e-70	-3.29288	4.298e-66	1.16684e-64	-3.56264	8.68332e-61	1.90871e-59	-3.58939	3.46659e-52	1.39555e-50	-3.65084	7.5426e-54	2.59842e-52	-3.59926	5.15994e-54	1.76894e-52	-3.39974	2.95454e-128	4.67222e-127
ENSG00000256813	RP11-804A23.4	-2.60457	3.74754e-57	5.08698e-56	-2.60756	1.75246e-59	3.09038e-58	-2.56821	1.01718e-52	1.21871e-51	-2.53033	1.36496e-38	1.34774e-37	-2.58243	2.1026e-44	2.69569e-43	-2.58546	3.75172e-43	4.15254e-42	-2.61045	3.70759e-140	7.85564e-139
ENSG00000256825	CTD-2140B24.4	-2.4462	8.55798e-58	1.20945e-56	-2.4462	4.98665e-60	9.05436e-59	-2.4462	1.47468e-55	2.1443e-54	-2.4462	1.37209e-43	2.1944e-42	-2.4462	7.69916e-46	1.12649e-44	-2.4462	2.4357e-44	3.03709e-43	-2.4462	1.75118e-141	3.84932e-140
ENSG00000256861	RP11-512M8.5	-4.44084	2.24633e-98	1.26603e-95	-4.44084	4.22194e-102	2.05128e-99	-4.44084	1.20041e-94	6.76549e-92	-4.44084	1.01386e-74	5.71411e-72	-4.44084	1.82972e-78	9.91566e-76	-4.44084	5.72312e-76	2.87996e-73	-4.44084	3.28878e-238	1.78227e-235
ENSG00000256928	RP11-809N8.2	-3.83517	8.20027e-61	1.41595e-59	-3.83517	3.69541e-63	8.25171e-62	-3.83517	1.82718e-58	3.3522e-57	-3.83517	6.70396e-46	1.35922e-44	-3.83517	2.90788e-48	5.38398e-47	-3.83517	1.09219e-46	1.69668e-45	-3.83517	1.06246e-148	2.87886e-147
ENSG00000256950	RP11-87C12.2	-3.88322	6.00261e-84	6.71244e-82	-3.91107	4.71652e-88	5.23274e-86	-3.81684	1.27762e-76	1.07153e-74	-3.83022	1.19729e-60	1.04782e-58	-3.82881	2.12847e-65	2.06829e-63	-3.88145	5.97062e-64	6.09609e-62	-3.92621	1.20349e-204	1.43705e-202
ENSG00000256966	RP11-613M10.8	-2.31204	1.83203e-58	2.70579e-57	-2.31204	1.00833e-60	1.9225e-59	-2.31204	3.3422e-56	5.08e-55	-2.31204	4.21663e-44	7.1495e-43	-2.31204	2.23465e-46	3.47147e-45	-2.31204	7.34404e-45	9.84562e-44	-2.31204	4.38727e-143	1.01339e-141
ENSG00000257181	RP11-611O2.5	-4.00263	5.49719e-46	3.71489e-45	-4.00263	8.80257e-48	7.32595e-47	-4.00263	3.44596e-44	2.29459e-43	-4.00263	1.44767e-34	1.00234e-33	-4.00263	2.23878e-36	1.45299e-35	-4.00263	3.60336e-35	2.08507e-34	-4.00263	3.60705e-113	3.88261e-112
ENSG00000257258	RP11-946L16.1	-2.9541	1.97259e-44	1.22117e-43	-2.7286	4.24569e-41	2.34763e-40	-2.40293	3.40905e-30	1.06623e-29	-2.43257	2.075e-22	6.26323e-22	-2.13917	1.24614e-21	3.1947e-21	-2.49312	4.00135e-26	1.29696e-25	-2.83737	1.22017e-97	9.16921e-97
ENSG00000257342	RP11-571M6.7	-6.22711	9.40834e-107	2.20939e-103	-6.22711	8.72473e-111	2.04886e-107	-6.22711	1.01899e-102	2.87153e-99	-6.22711	3.72609e-81	1.05001e-77	-6.22711	3.31745e-85	9.34858e-82	-6.22711	1.66196e-82	4.68342e-79	-6.22711	3.83977e-258	9.01707e-255
ENSG00000257379	RP11-793H13.8	-4.85522	5.42777e-86	7.21483e-84	-4.85522	2.9005e-89	3.61665e-87	-4.85522	1.02011e-82	1.43645e-80	-4.85522	3.26968e-65	4.50618e-63	-4.85522	1.67831e-68	2.26975e-66	-4.85522	2.61508e-66	3.46972e-64	-4.85522	9.77857e-209	1.36416e-206
ENSG00000257386	RP11-56G10.2	-3.7639	1.99252e-73	9.3895e-72	-3.7639	3.07979e-76	1.56094e-74	-3.7639	1.29459e-70	6.80625e-69	-3.7639	1.43547e-55	7.83942e-54	-3.7639	2.13268e-58	1.13823e-56	-3.7639	1.6362e-56	7.5587e-55	-3.7639	8.35899e-179	4.76835e-177
ENSG00000257390	RP11-762I7.5	-4.74646	4.6475e-100	3.27416e-97	-4.8289	5.3695e-108	6.30469e-105	-4.75446	6.33697e-95	3.72033e-92	-4.75948	3.03333e-76	2.37442e-73	-4.7621	1.39932e-79	9.38876e-77	-4.79647	1.94611e-78	1.4432e-75	-4.8262	8.62642e-249	8.10309e-246
ENSG00000257411	RP11-603J24.9	-5.73704	1.82462e-87	2.70619e-85	-5.73704	8.60983e-91	1.22538e-88	-5.73704	3.88354e-84	5.94773e-82	-5.73704	2.4172e-66	3.66218e-64	-5.73704	1.09554e-69	1.64214e-67	-5.73704	1.8547e-67	2.75081e-65	-5.73704	3.03596e-212	4.86099e-210
ENSG00000257452	RP1-71H24.1	-3.29542	4.49607e-52	4.41768e-51	-3.32104	1.97797e-54	2.48835e-53	-3.16415	4.59099e-46	3.47033e-45	-3.21664	5.70711e-37	4.87648e-36	-3.19885	5.44122e-39	4.34373e-38	-3.24328	6.64287e-39	5.15408e-38	-3.31497	1.18089e-126	1.79296e-125
ENSG00000257524	RP11-203J24.9	-3.23857	1.51836e-63	3.16007e-62	-3.39522	4.33392e-70	1.50778e-68	-3.32275	5.69718e-60	1.15668e-58	-3.22417	1.05157e-44	1.88987e-43	-3.29938	1.40867e-50	3.28613e-49	-3.34154	2.66833e-49	5.40183e-48	-3.44323	5.64635e-161	1.98893e-159
ENSG00000257529	RPL36A-HNRNPH2	-6.05161	2.93401e-104	3.7582e-101	-6.05161	3.35749e-108	4.30064e-105	-6.05161	2.57516e-100	3.6284e-97	-6.05161	3.06785e-79	4.3226e-76	-6.05161	3.37065e-83	4.74925e-80	-6.05161	1.46773e-80	1.88003e-77	-6.05161	3.2917e-252	4.21637e-249
ENSG00000257553	RP11-603J24.17	-4.07684	2.97919e-73	1.38537e-71	-4.07684	4.67346e-76	2.35175e-74	-4.07684	1.90724e-70	9.95295e-69	-4.07684	1.95433e-55	1.05909e-53	-4.07684	2.94684e-58	1.54353e-56	-4.07684	2.23864e-56	1.01097e-54	-4.07684	2.18075e-178	1.23401e-176
ENSG00000257594	GALNT4	-2.77211	3.44447e-49	2.82824e-48	-2.76429	5.63353e-51	5.69007e-50	-2.65951	2.55776e-45	1.82845e-44	-2.65439	1.1531e-35	8.77754e-35	-2.67537	9.05267e-38	6.54114e-37	-2.65907	2.92766e-36	1.85064e-35	-2.77207	2.131e-120	2.74459e-119
ENSG00000257663	RP11-1100L3.7	-5.0887	1.39867e-81	1.23171e-79	-5.09003	1.02775e-84	8.9389e-83	-5.08076	6.18117e-78	5.69233e-76	-5.08344	1.25443e-61	1.20237e-59	-5.08062	1.12815e-64	1.02552e-62	-5.08167	1.14625e-62	1.0353e-60	-5.08836	6.63107e-198	6.3559e-196
ENSG00000257764	RP11-1143G9.4	-5.81008	5.36681e-40	2.60484e-39	-5.81008	1.44248e-41	8.18547e-41	-5.81008	2.00383e-38	9.62961e-38	-5.81008	5.27989e-30	2.603e-29	-5.81008	1.37364e-31	6.35408e-31	-5.81008	1.56313e-30	6.60799e-30	-5.81008	9.8736e-99	7.59798e-98
ENSG00000257767	RP11-162P23.2	-6.39764	5.48062e-86	7.217e-84	-6.39764	2.92979e-89	3.62111e-87	-6.39764	1.02967e-82	1.43645e-80	-6.39764	3.29409e-65	4.50618e-63	-6.39764	1.69144e-68	2.26975e-66	-6.39764	2.63491e-66	3.46972e-64	-6.39764	1.00068e-208	1.38231e-206
ENSG00000257824	RP11-1049A21.2	-2.59361	3.01022e-49	2.48326e-48	-2.59361	3.64178e-51	3.73183e-50	-2.59361	2.49784e-47	2.05456e-46	-2.59361	4.6943e-37	4.03309e-36	-2.59361	5.47945e-39	4.37177e-38	-2.59361	1.06383e-37	7.49844e-37	-2.59361	5.24867e-121	6.87302e-120
ENSG00000257921	RP11-571M6.15	-2.34414	1.87047e-57	2.58381e-56	-2.34414	1.1219e-59	1.99843e-58	-2.34414	3.13118e-55	4.44741e-54	-2.34414	2.49621e-43	3.86926e-42	-2.34414	1.44191e-45	2.06258e-44	-2.34414	4.47428e-44	5.42069e-43	-2.34414	1.13673e-140	2.44154e-139
ENSG00000257949	TEN1	-2.94083	1.23805e-61	2.25668e-60	-2.95256	3.02037e-64	7.24991e-63	-2.93117	1.43029e-58	2.66571e-57	-2.90722	1.12017e-44	1.99787e-43	-2.94016	1.42111e-48	2.72057e-47	-2.9423	4.30164e-47	6.8797e-46	-2.89188	1.79979e-144	4.33488e-143
ENSG00000257950	P2RX5-TAX1BP3	-2.74282	8.43124e-69	2.68163e-67	-2.9161	1.6847e-75	8.12923e-74	-2.86013	2.72248e-64	8.2317e-63	-2.82322	9.49088e-52	3.67381e-50	-2.86686	6.15453e-57	2.85255e-55	-2.88646	1.95165e-54	7.10561e-53	-2.87769	1.13989e-159	3.88889e-158
ENSG00000258017	RP11-386G11.10	-8.73803	3.70922e-96	1.41251e-93	-9.07038	2.03681e-105	1.51046e-102	-8.66193	1.90751e-89	5.16862e-87	-8.64646	2.44557e-70	6.50153e-68	-8.63354	4.15806e-76	1.46468e-73	-8.85908	6.6081e-75	2.66023e-72	-8.71657	4.49506e-220	9.31403e-218
ENSG00000258064	RP11-293I14.2	-4.54025	1.60112e-69	5.41003e-68	-4.54025	3.44488e-72	1.37503e-70	-4.54025	7.47322e-67	2.94128e-65	-4.54025	1.41872e-52	5.9317e-51	-4.54025	2.93498e-55	1.13922e-53	-4.54025	1.8058e-53	5.80908e-52	-4.54025	1.71315e-169	7.73661e-168
ENSG00000258082	RP11-443B7.3	-3.21066	1.07107e-58	1.60546e-57	-3.19239	1.47978e-60	2.80244e-59	-3.07916	2.81666e-47	2.30737e-46	-3.08082	1.2636e-39	1.37377e-38	-3.14736	5.32261e-45	7.27406e-44	-3.15668	7.88421e-44	9.28834e-43	-3.21235	3.78315e-143	8.7672e-142
ENSG00000258092	RP4-816N1.7	-2.61513	3.65345e-44	2.23425e-43	-2.68368	2.55222e-49	2.33208e-48	-2.6478	2.78605e-43	1.76033e-42	-2.62418	6.30064e-32	3.54112e-31	-2.62891	1.57164e-35	9.61966e-35	-2.64415	6.59269e-35	3.76077e-34	-2.71552	2.38688e-118	2.89674e-117
ENSG00000258181	RP11-493L12.4	-2.95428	1.51373e-45	9.97123e-45	-2.73822	1.24502e-40	6.7109e-40	-2.49374	4.28569e-33	1.53691e-32	-2.50328	2.9947e-25	1.07834e-24	-2.3922	1.30664e-26	4.40234e-26	-2.58257	2.90065e-28	1.07046e-27	-2.56462	5.6461e-80	2.87093e-79
ENSG00000258186	SLC7A5P2	-2.80531	2.11579e-43	1.23545e-42	-2.80531	4.2344e-45	3.00416e-44	-2.80531	1.06109e-41	6.10732e-41	-2.80531	1.35326e-32	8.04875e-32	-2.80531	2.61797e-34	1.47137e-33	-2.80531	3.6295e-33	1.83691e-32	-2.80531	6.03791e-107	5.60435e-106
ENSG00000258210	RP11-478C19.2	-4.87642	1.56979e-84	1.79824e-82	-4.97166	1.48836e-88	1.71893e-86	-5.00257	5.37717e-81	6.53141e-79	-4.92948	3.4952e-60	2.94894e-58	-4.88634	4.82261e-63	3.83901e-61	-4.91142	5.23914e-64	5.4279e-62	-4.96801	4.67969e-191	3.66316e-189
ENSG00000258227	CLEC5A	-2.82938	2.01632e-18	3.77291e-18	-2.77669	3.74786e-18	7.18467e-18	-2.54762	3.17773e-15	5.50999e-15	-2.50213	2.9471e-11	5.06027e-11	-2.41506	1.93125e-11	3.17222e-11	-2.45539	1.57904e-11	2.56942e-11	-2.88763	4.1631e-44	9.97586e-44
ENSG00000258232	RP11-161H23.5	-4.23875	6.05809e-59	9.25797e-58	-4.24076	3.01587e-61	5.99345e-60	-4.22436	2.59008e-56	3.98409e-55	-4.23364	2.20684e-44	3.84832e-43	-4.23791	9.67205e-47	1.56284e-45	-4.23878	3.12713e-45	4.3453e-44	-4.23403	8.62151e-144	2.04507e-142
ENSG00000258301	RP11-488C13.5	-4.06571	4.59239e-60	7.5592e-59	-4.14956	4.28074e-64	1.01541e-62	-4.1589	4.06022e-58	7.24158e-57	-4.13888	1.06076e-45	2.09623e-44	-4.13286	1.84613e-47	3.16063e-46	-4.20563	3.88395e-47	6.24001e-46	-4.02693	2.29056e-137	4.53925e-136
ENSG00000258311	RP11-644F5.10	-2.30199	9.8654e-53	1.01462e-51	-2.46563	1.18534e-55	1.6215e-54	-2.44567	6.45939e-52	7.26939e-51	-2.36156	9.10047e-40	1.00806e-38	-2.38226	5.6958e-42	5.90536e-41	-2.35712	1.88551e-40	1.67087e-39	-2.59811	2.19662e-138	4.44052e-137
ENSG00000258315	C17orf49	-3.18107	5.34509e-70	1.89227e-68	-3.61128	1.27111e-80	8.61052e-79	-3.53607	5.78748e-71	3.19787e-69	-3.50344	1.20366e-53	5.5605e-52	-3.52396	4.49856e-58	2.29655e-56	-3.52753	6.11259e-57	3.04334e-55	-3.65347	1.16564e-179	6.84328e-178
ENSG00000258317	RP11-603J24.5	-2.24484	8.7087e-40	4.16374e-39	-2.57226	2.84164e-53	3.34492e-52	-2.58248	2.76889e-48	2.42321e-47	-2.43132	1.75711e-31	9.57373e-31	-2.54494	9.70981e-41	8.99482e-40	-2.42394	3.19e-37	2.17136e-36	-2.42494	1.05642e-95	7.59053e-95
ENSG00000258352	RP11-23J18.1	-3.19223	7.09441e-50	6.09886e-49	-3.00616	5.65588e-48	4.77479e-47	-2.79078	4.90823e-37	2.17133e-36	-2.85196	2.213e-30	1.12243e-29	-2.64525	7.50823e-30	3.09421e-29	-2.88669	1.06974e-32	5.22267e-32	-2.69016	7.62494e-89	4.68945e-88
ENSG00000258377	RP11-649E7.5	-4.26498	5.15525e-73	2.33561e-71	-4.26498	8.25174e-76	4.05112e-74	-4.26498	3.23445e-70	1.64525e-68	-4.26498	2.97628e-55	1.58848e-53	-4.26498	4.57928e-58	2.32931e-56	-4.26498	3.43227e-56	1.51127e-54	-4.26498	8.06019e-178	4.41899e-176
ENSG00000258407	RP11-300J18.2	-3.89029	1.54377e-52	1.55815e-51	-3.86647	4.31209e-54	5.29706e-53	-3.58155	2.07562e-41	1.18021e-40	-3.74694	1.49336e-36	1.23122e-35	-3.6737	4.58638e-37	3.14922e-36	-3.79645	9.58348e-39	7.35865e-38	-3.88473	5.41036e-128	8.48908e-127
ENSG00000258427	RBM8B	-3.2746	2.95659e-74	1.4878e-72	-3.2274	1.24352e-77	6.98221e-76	-3.31661	1.37995e-67	5.89197e-66	-3.40866	9.33081e-61	8.42763e-59	-3.4154	6.51346e-64	5.5286e-62	-3.36839	5.73729e-60	4.04192e-58	-3.31227	4.10036e-164	1.59597e-162
ENSG00000258430	RP11-982M15.2	-2.50281	2.45371e-54	2.7548e-53	-2.50281	1.92025e-56	2.77501e-55	-2.50281	3.14793e-52	3.6178e-51	-2.50281	6.06224e-41	7.46651e-40	-2.50281	4.57175e-43	5.21165e-42	-2.50281	1.18763e-41	1.16287e-40	-2.50281	3.301e-133	5.88748e-132
ENSG00000258451	RP11-903H12.3	-2.15913	8.76716e-47	6.21063e-46	-2.1574	1.63198e-48	1.42558e-47	-2.11559	2.94272e-42	1.74875e-41	-2.13041	1.09837e-33	7.08612e-33	-2.13715	2.08301e-36	1.35564e-35	-2.15644	2.16861e-35	1.27741e-34	-2.16765	5.63975e-115	6.3167e-114
ENSG00000258465	DCAF8	-4.37165	1.18067e-89	2.0043e-87	-4.44793	6.67402e-95	1.32446e-92	-4.43012	9.7678e-87	1.96612e-84	-4.41787	9.34059e-68	1.54834e-65	-4.42446	5.56665e-72	1.05992e-69	-4.42052	1.00869e-69	1.87005e-67	-4.37767	3.56244e-209	5.12191e-207
ENSG00000258466	RP11-1012A1.4	-4.18484	5.09288e-76	2.90521e-74	-4.21044	1.73367e-79	1.10531e-77	-4.06529	1.93561e-67	8.19003e-66	-4.03016	2.00093e-51	7.32288e-50	-4.02162	6.38393e-56	2.68506e-54	-4.10697	7.054e-57	3.4631e-55	-4.18287	2.59684e-178	1.46358e-176
ENSG00000258471	RP11-84C10.4	-2.80689	1.16639e-52	1.19437e-51	-2.99856	1.43626e-57	2.25858e-56	-2.97062	4.46137e-52	5.08993e-51	-2.93752	1.9377e-40	2.28279e-39	-2.97423	1.29179e-43	1.5451e-42	-2.99904	9.97858e-43	1.06353e-41	-2.97038	8.9509e-133	1.58639e-131
ENSG00000258476	RP11-76E17.3	-2.70888	2.39666e-25	5.79027e-25	-2.65612	1.4226e-25	3.624e-25	-2.2204	1.02714e-18	2.00422e-18	-2.15224	8.26276e-14	1.59221e-13	-2.17836	1.33796e-14	2.48018e-14	-2.44701	5.94221e-17	1.20921e-16	-2.68225	5.34598e-62	1.83272e-61
ENSG00000258504	RP11-638I2.6	-2.45167	6.36443e-53	6.65737e-52	-2.45167	5.6205e-55	7.33946e-54	-2.45167	7.23546e-51	7.52381e-50	-2.45167	7.30743e-40	8.18456e-39	-2.45167	6.22057e-42	6.43051e-41	-2.45167	1.49058e-40	1.33348e-39	-2.45167	8.05447e-130	1.31962e-128
ENSG00000258529	ALG9	-3.00789	9.63892e-64	2.03617e-62	-3.00789	3.38622e-66	9.24648e-65	-3.00789	2.75516e-61	6.28158e-60	-3.00789	3.81967e-48	9.98501e-47	-3.00789	1.29106e-50	3.02177e-49	-3.00789	5.72635e-49	1.13003e-47	-3.00789	1.06482e-155	3.35644e-154
ENSG00000258554	RP11-973D8.4	-2.25817	3.63131e-50	3.16812e-49	-2.25817	4.06037e-52	4.44182e-51	-2.25817	3.26026e-48	2.84264e-47	-2.25817	9.33372e-38	8.56199e-37	-2.25817	1.0067e-39	8.55514e-39	-2.25817	2.06022e-38	1.53753e-37	-2.25817	3.27704e-123	4.50034e-122
ENSG00000258555	SPECC1L-ADORA2A	-2.75918	3.94518e-57	5.34496e-56	-2.76578	1.94597e-59	3.42306e-58	-2.73654	1.49647e-54	2.02743e-53	-2.73261	1.13714e-42	1.67422e-41	-2.73307	5.86709e-45	8.00264e-44	-2.74278	1.30221e-43	1.50025e-42	-2.6391	8.86019e-118	1.05707e-116
ENSG00000258588	TRIM6-TRIM34	-4.36721	1.33636e-66	3.5527e-65	-4.36721	3.6834e-69	1.20137e-67	-4.36721	4.86875e-64	1.43216e-62	-4.36721	2.46419e-50	7.96339e-49	-4.36721	6.53259e-53	1.9923e-51	-4.36721	3.40684e-51	8.43626e-50	-4.36721	1.60022e-162	5.85641e-161
ENSG00000258610	RP11-488C13.7	-4.58415	7.29785e-67	1.99663e-65	-4.58415	1.96717e-69	6.53712e-68	-4.58415	2.71875e-64	8.2317e-63	-4.58415	1.54983e-50	5.17467e-49	-4.58415	4.01795e-53	1.26651e-51	-4.58415	2.12682e-51	5.41898e-50	-4.58415	3.77729e-163	1.40799e-161
ENSG00000258643	BCL2L2-PABPN1	-2.94527	3.37041e-55	4.06584e-54	-3.27007	8.06466e-73	3.35195e-71	-3.2317	3.15151e-63	8.39409e-62	-3.27078	9.35249e-51	3.17534e-49	-3.20857	3.59982e-54	1.26804e-52	-3.3695	5.78726e-56	2.48605e-54	-3.26536	3.38135e-157	1.09525e-155
ENSG00000258644	SYNJ2BP-COX16	-4.40483	2.66365e-86	3.64377e-84	-4.4251	2.28135e-90	3.06136e-88	-4.42023	2.67304e-83	3.8828e-81	-4.4202	9.49043e-66	1.35071e-63	-4.41989	3.48819e-69	4.9645e-67	-4.41973	7.05898e-67	9.87786e-65	-4.42699	8.00385e-211	1.21263e-208
ENSG00000258653	RP5-1021I20.4	-4.48228	1.60908e-90	3.10574e-88	-4.53739	3.87477e-95	8.02875e-93	-4.48803	3.84148e-86	6.93929e-84	-4.50004	7.74249e-69	1.62823e-66	-4.48487	5.1573e-72	9.9543e-70	-4.51986	1.9897e-70	4.06303e-68	-4.54099	8.98853e-222	2.01029e-219
ENSG00000258659	TRIM34	-4.65553	3.13233e-68	9.49128e-67	-4.65113	8.4592e-71	3.06402e-69	-4.62946	3.37192e-65	1.12318e-63	-4.61363	5.85716e-51	2.05292e-49	-4.61506	9.95401e-54	3.37957e-52	-4.64494	2.40383e-52	6.85625e-51	-4.618	6.80402e-164	2.62654e-162
ENSG00000258666	RP11-638I2.8	-3.52581	2.45241e-53	2.62372e-52	-3.52581	2.0904e-55	2.81315e-54	-3.52581	2.88856e-51	3.09035e-50	-3.52581	3.52472e-40	4.05746e-39	-3.52581	2.89581e-42	3.0794e-41	-3.52581	7.10516e-41	6.49654e-40	-3.52581	8.196e-131	1.37642e-129
ENSG00000258674	CTC-260F20.3	-3.93104	4.52705e-46	3.077e-45	-3.97787	3.54929e-53	4.15706e-52	-4.56178	2.50923e-71	1.42561e-69	-4.37792	2.771e-47	6.61752e-46	-4.44831	1.85011e-54	6.71859e-53	-4.36257	1.88307e-49	3.91335e-48	-3.80546	8.20466e-97	6.03359e-96
ENSG00000258677	RP11-463D19.2	-4.61592	1.32948e-85	1.68761e-83	-4.61592	7.34182e-89	8.69296e-87	-4.61592	2.41791e-82	3.2446e-80	-4.61592	6.50402e-65	8.64544e-63	-4.61592	3.45004e-68	4.45973e-66	-4.61592	5.25921e-66	6.44367e-64	-4.61592	8.25293e-208	1.09702e-205
ENSG00000258727	RP11-66N24.3	-3.33899	1.10948e-65	2.70929e-64	-3.43451	2.92121e-71	1.08601e-69	-3.39098	1.46011e-64	4.58196e-63	-3.36618	2.65179e-50	8.55004e-49	-3.37461	3.67595e-53	1.16917e-51	-3.39502	6.29019e-52	1.72095e-50	-3.31287	4.50581e-157	1.45279e-155
ENSG00000258728	GALT	-3.68326	3.14211e-63	6.35184e-62	-3.68326	1.15303e-65	3.05954e-64	-3.68326	8.59813e-61	1.89589e-59	-3.68326	9.44545e-48	2.40228e-46	-3.68326	3.33507e-50	7.51858e-49	-3.68326	1.4368e-48	2.72355e-47	-3.68326	1.7901e-154	5.53124e-153
ENSG00000258745	RP11-218E20.5	-3.0725	1.16619e-51	1.10875e-50	-3.04158	5.66401e-53	6.48828e-52	-2.76237	4.82416e-40	2.54292e-39	-2.79113	2.39811e-31	1.29461e-30	-2.77159	4.17514e-34	2.30787e-33	-2.90513	3.33802e-36	2.10437e-35	-2.94171	8.80411e-107	8.13442e-106
ENSG00000258757	RP11-841O20.2	-2.47355	1.09731e-58	1.64305e-57	-2.47355	5.92604e-61	1.15329e-59	-2.47355	2.04017e-56	3.1703e-55	-2.47355	2.84814e-44	4.93001e-43	-2.47355	1.481e-46	2.32894e-45	-2.47355	4.92924e-45	6.74301e-44	-2.47355	1.28783e-143	3.04455e-142
ENSG00000258777	HIF1A-AS1	-2.54606	2.5844e-34	9.38511e-34	-2.56738	1.33834e-36	5.84899e-36	-2.71901	5.59464e-35	2.22805e-34	-2.6722	1.64738e-26	6.39261e-26	-2.63672	1.79357e-28	6.77518e-28	-2.68454	2.05592e-28	7.65943e-28	-2.75778	1.05816e-89	6.69188e-89
ENSG00000258790	KIAA0391	-5.0498	1.28971e-92	3.15846e-90	-5.06432	2.64052e-96	6.41463e-94	-5.03428	3.88667e-88	8.97758e-86	-5.03737	8.32538e-70	2.02249e-67	-5.02744	3.92798e-73	8.78495e-71	-5.0601	2.78886e-71	6.33791e-69	-5.05423	1.81141e-221	3.98792e-219
ENSG00000258800	CTD-2302E22.2	-3.06439	3.79135e-49	3.10221e-48	-3.06439	4.6264e-51	4.69639e-50	-3.06439	3.11906e-47	2.54769e-46	-3.06439	5.5986e-37	4.78667e-36	-3.06439	6.59161e-39	5.23834e-38	-3.06439	1.27242e-37	8.92849e-37	-3.06439	9.13252e-121	1.18378e-119
ENSG00000258818	RNASE4	-3.87313	3.12136e-63	6.31896e-62	-3.86571	1.47031e-65	3.87227e-64	-3.8735	1.0965e-60	2.37688e-59	-3.84746	6.00117e-47	1.35943e-45	-3.88304	2.8007e-50	6.33418e-49	-3.87603	1.43813e-48	2.72355e-47	-3.86473	9.79831e-154	2.99475e-152
ENSG00000258820	RP11-293M10.2	-2.17978	2.4948e-25	6.02119e-25	-2.18546	2.06586e-26	5.44787e-26	-2.03638	4.11588e-21	8.80279e-21	-2.09839	1.08629e-17	2.51659e-17	-2.129	2.95102e-19	6.78411e-19	-2.13758	9.29489e-19	2.05114e-18	-2.17573	1.37073e-62	4.77115e-62
ENSG00000258830	RP11-123K3.4	-2.15873	8.66525e-48	6.55359e-47	-2.15873	1.18827e-49	1.11395e-48	-2.15873	6.34325e-46	4.73894e-45	-2.15873	6.10297e-36	4.73779e-35	-2.15873	8.07802e-38	5.86395e-37	-2.15873	1.44227e-36	9.27929e-36	-2.15873	1.67671e-117	1.98195e-116
ENSG00000258838	ERCC6-PGBD3	-2.48028	8.06627e-52	7.77917e-51	-2.48027	7.83032e-54	9.50294e-53	-2.47994	8.47082e-50	8.20865e-49	-2.47993	5.14349e-39	5.32099e-38	-2.47981	4.83976e-41	4.60447e-40	-2.4804	1.06816e-39	8.8324e-39	-2.4804	3.50984e-127	5.42256e-126
ENSG00000258864	CTC-554D6.1	-5.25724	8.25854e-108	2.32726e-104	-5.26676	1.72275e-112	4.85472e-109	-5.19972	9.42675e-96	6.99068e-93	-5.21686	5.35008e-76	3.76913e-73	-5.2157	1.97041e-81	1.63312e-78	-5.25259	8.09006e-82	1.42486e-78	-5.26798	7.96704e-260	2.24511e-256
ENSG00000258892	RP11-193F5.1	-2.61959	5.55091e-54	6.1247e-53	-2.61959	4.47768e-56	6.36635e-55	-2.61959	6.90889e-52	7.74433e-51	-2.61959	1.13178e-40	1.37e-39	-2.61959	8.7983e-43	9.82314e-42	-2.61959	2.23979e-41	2.13234e-40	-2.61959	2.3326e-132	4.08785e-131
ENSG00000258908	RP11-203M5.8	-4.30838	2.87346e-74	1.45115e-72	-4.30838	4.1363e-77	2.23297e-75	-4.30838	2.0047e-71	1.14822e-69	-4.30838	3.24981e-56	1.89999e-54	-4.30838	4.49625e-59	2.54426e-57	-4.30838	3.61732e-57	1.84e-55	-4.30838	8.26917e-181	5.00054e-179
ENSG00000258924	CTB-96E2.3	-3.22546	1.40116e-76	8.54647e-75	-3.22546	1.65863e-79	1.06228e-77	-3.22546	1.18873e-73	7.938e-72	-3.22546	5.47189e-58	3.81678e-56	-3.22546	6.22468e-61	4.17646e-59	-3.22546	5.70594e-59	3.58914e-57	-3.22546	2.55638e-186	1.80097e-184
ENSG00000258941	RP11-407N17.3	-4.09842	2.88641e-75	1.57025e-73	-4.09842	3.81846e-78	2.24175e-76	-4.09842	2.19119e-72	1.32506e-70	-4.09842	5.57427e-57	3.49073e-55	-4.09842	7.08719e-60	4.32288e-58	-4.09842	6.03227e-58	3.39979e-56	-4.09842	3.45693e-183	2.21401e-181
ENSG00000258964	RP11-618G20.1	-5.15819	1.50714e-58	2.24004e-57	-5.15877	8.13325e-61	1.55915e-59	-5.15624	3.00009e-56	4.58474e-55	-5.15599	3.82416e-44	6.49968e-43	-5.14652	2.56936e-46	3.95222e-45	-5.1532	7.54014e-45	1.00989e-43	-5.15877	2.67267e-143	6.23474e-142
ENSG00000258973	RP11-934B9.3	-2.48366	3.35063e-60	5.55417e-59	-2.48366	1.59055e-62	3.44782e-61	-2.48366	7.08745e-58	1.23592e-56	-2.48366	1.96998e-45	3.78676e-44	-2.48366	9.00186e-48	1.58953e-46	-2.48366	3.26565e-46	4.895e-45	-2.48366	3.07143e-147	7.95524e-146
ENSG00000258984	UBE2F-SCLY	-4.02118	1.81954e-86	2.56374e-84	-4.07963	6.86169e-91	9.86543e-89	-3.99982	3.86305e-81	4.73308e-79	-3.99557	5.45343e-64	6.62403e-62	-4.00537	7.87727e-68	9.82219e-66	-4.04515	9.36373e-67	1.29348e-64	-4.07946	8.36885e-210	1.21564e-207
ENSG00000258989	RP11-47I22.4	-3.1239	7.51919e-56	9.3757e-55	-3.1239	5.17115e-58	8.35568e-57	-3.1239	1.09775e-53	1.39723e-52	-3.1239	4.21523e-42	5.80005e-41	-3.1239	2.79266e-44	3.55132e-43	-3.1239	7.90886e-43	8.51305e-42	-3.1239	7.84294e-137	1.53057e-135
ENSG00000259001	RPPH1	-2.86793	1.60978e-34	5.91907e-34	-2.87638	5.07485e-36	2.1544e-35	-2.86304	4.80014e-33	1.71616e-32	-2.86171	9.07383e-26	3.37425e-25	-2.86144	4.04996e-27	1.40829e-26	-2.86766	2.66109e-26	8.71564e-26	-2.86953	2.1851e-85	1.25053e-84
ENSG00000259004	RP11-8L8.2	-2.60388	1.42688e-59	2.27173e-58	-2.48588	7.36791e-56	1.02583e-54	-2.50218	7.07459e-50	6.90311e-49	-2.45595	6.78153e-40	7.61976e-39	-2.51905	3.38482e-44	4.285e-43	-2.4919	7.97815e-43	8.57453e-42	-2.55497	1.21035e-131	2.08227e-130
ENSG00000259007	RP11-463J10.3	-3.79139	2.2009e-65	5.23828e-64	-3.79139	6.72607e-68	2.01639e-66	-3.79139	7.23188e-63	1.88002e-61	-3.79139	2.1096e-49	6.21845e-48	-3.79139	6.20165e-52	1.6487e-50	-3.79139	3.01887e-50	6.75172e-49	-3.79139	1.28295e-159	4.35586e-158
ENSG00000259024	TVP23C-CDRT4	-2.37532	1.41863e-45	9.37986e-45	-2.37532	2.35364e-47	1.9092e-46	-2.37532	8.58281e-44	5.5729e-43	-2.37532	2.98306e-34	2.00849e-33	-2.37532	4.78042e-36	3.02997e-35	-2.37532	7.51376e-35	4.2758e-34	-2.37532	3.52848e-112	3.69089e-111
ENSG00000259040	BLOC1S5-TXNDC5	-2.14465	2.5608e-50	2.25229e-49	-2.14465	2.82638e-52	3.11123e-51	-2.14465	2.32924e-48	2.04734e-47	-2.14465	7.14802e-38	6.62167e-37	-2.14465	7.6097e-40	6.52591e-39	-2.14465	1.57093e-38	1.18239e-37	-2.14465	1.41748e-123	1.96191e-122
ENSG00000259052	AL157871.2	-2.09604	4.44465e-47	3.20497e-46	-2.09604	6.4786e-49	5.77378e-48	-2.09604	3.06089e-45	2.17598e-44	-2.09604	2.1252e-35	1.58267e-34	-2.09604	2.99066e-37	2.084e-36	-2.09604	5.12598e-36	3.17892e-35	-2.09604	8.52705e-116	9.76004e-115
ENSG00000259053	RP11-33N16.3	-3.85196	2.41864e-66	6.29921e-65	-3.85196	6.81382e-69	2.15262e-67	-3.85196	8.62128e-64	2.45402e-62	-3.85196	3.88295e-50	1.2267e-48	-3.85196	1.05215e-52	3.09496e-51	-3.85196	5.40765e-51	1.31142e-49	-3.85196	6.59311e-162	2.36982e-160
ENSG00000259066	RP11-371E8.4	-3.13879	1.03906e-65	2.54614e-64	-3.38987	1.35591e-73	5.95163e-72	-3.29954	1.16867e-59	2.31271e-58	-3.41553	9.14152e-51	3.11874e-49	-3.32364	3.83473e-53	1.21419e-51	-3.45157	4.41752e-56	1.92702e-54	-3.51427	7.63527e-163	2.82365e-161
ENSG00000259075	POC1B-GALNT4	-2.72426	1.61328e-49	1.35385e-48	-2.72392	1.98729e-51	2.06648e-50	-2.62224	5.38314e-46	4.04741e-45	-2.60928	1.13139e-35	8.62622e-35	-2.62021	6.42464e-38	4.70984e-37	-2.64948	4.87092e-37	3.25421e-36	-2.73796	5.83542e-122	7.77872e-121
ENSG00000259080	RP11-158I13.2	-3.58959	3.98114e-66	1.02175e-64	-3.58959	1.14236e-68	3.54533e-67	-3.58959	1.39326e-63	3.87199e-62	-3.58959	5.68925e-50	1.75793e-48	-3.58959	1.57021e-52	4.48768e-51	-3.58959	7.97194e-51	1.89418e-49	-3.58959	2.16603e-161	7.70692e-160
ENSG00000259112	NDUFC2-KCTD14	-5.31643	2.54848e-87	3.74042e-85	-5.31643	1.21737e-90	1.6983e-88	-5.31643	5.35817e-84	8.11791e-82	-5.31643	3.12405e-66	4.68275e-64	-5.31643	1.43336e-69	2.1259e-67	-5.31643	2.40688e-67	3.49618e-65	-5.31643	6.72598e-212	1.06482e-209
ENSG00000259115	CTD-2540L5.5	-3.28751	5.68847e-77	3.56225e-75	-3.28751	6.51445e-80	4.26924e-78	-3.28751	4.98852e-74	3.4455e-72	-3.28751	2.74e-58	1.95973e-56	-3.28751	3.01537e-61	2.08267e-59	-3.28751	2.82581e-59	1.83482e-57	-3.28751	2.98373e-187	2.13405e-185
ENSG00000259124	RP11-187O7.3	-3.09484	6.39404e-28	1.72491e-27	-2.85669	2.36834e-26	6.2327e-26	-2.55498	1.03673e-20	2.18283e-20	-2.44276	1.86539e-14	3.71077e-14	-2.50342	1.06104e-16	2.16072e-16	-2.73441	3.47229e-18	7.4751e-18	-2.63732	7.93194e-54	2.30483e-53
ENSG00000259132	RP11-298I3.5	-4.81787	7.74585e-75	4.05721e-73	-4.81787	1.06256e-77	6.01263e-76	-4.81787	5.67071e-72	3.31537e-70	-4.81787	1.18875e-56	7.18859e-55	-4.81787	1.56726e-59	9.16294e-58	-4.81787	1.30208e-57	6.97578e-56	-4.81787	3.63459e-182	2.25601e-180
ENSG00000259185	RP11-56B16.4	-3.06845	2.81082e-64	6.13859e-63	-3.06845	9.43583e-67	2.64316e-65	-3.06845	8.408e-62	2.00116e-60	-3.06845	1.48573e-48	4.04129e-47	-3.06845	4.79834e-51	1.16768e-49	-3.06845	2.19382e-49	4.49286e-48	-3.06845	5.61418e-157	1.80602e-155
ENSG00000259238	RP11-361D15.2	-3.0838	4.13749e-63	8.30445e-62	-3.11191	2.22146e-65	5.78566e-64	-2.5127	4.36566e-41	2.44581e-40	-2.50612	4.99314e-30	2.46854e-29	-2.49713	8.33798e-32	3.91216e-31	-2.78483	1.74273e-37	1.20961e-36	-3.20472	1.45803e-147	3.84712e-146
ENSG00000259305	ZHX1-C8orf76	-3.0352	2.55272e-70	9.27007e-69	-3.10307	1.11693e-74	5.17683e-73	-2.95577	9.33355e-64	2.63547e-62	-2.96432	1.01811e-49	3.09163e-48	-2.94639	7.17132e-53	2.16832e-51	-3.05179	4.17883e-53	1.31428e-51	-3.11307	4.9728e-172	2.42446e-170
ENSG00000259316	CTD-2116N17.1	-2.28413	1.21701e-69	4.17218e-68	-2.28654	2.32e-72	9.4204e-71	-2.16964	1.99001e-62	5.03397e-61	-2.18469	2.54847e-49	7.43436e-48	-2.15025	6.00045e-51	1.44277e-49	-2.23406	4.66064e-52	1.28259e-50	-2.283	3.81662e-169	1.70178e-167
ENSG00000259332	ST20-MTHFS	-4.28115	1.4053e-56	1.84536e-55	-4.28115	9.08241e-59	1.53076e-57	-4.28115	2.18319e-54	2.92685e-53	-4.28115	1.16817e-42	1.71632e-41	-4.28115	7.2721e-45	9.82396e-44	-4.28115	2.14676e-43	2.42955e-42	-4.28115	1.41638e-138	2.87561e-137
ENSG00000259352	RP11-109D20.2	-2.11852	6.63313e-40	3.20181e-39	-2.11852	1.79714e-41	1.01449e-40	-2.11852	2.45692e-38	1.1727e-37	-2.11852	6.20283e-30	3.0431e-29	-2.11852	1.62677e-31	7.49546e-31	-2.11852	1.84129e-30	7.74904e-30	-2.11852	1.64733e-98	1.26215e-97
ENSG00000259357	RP11-316M1.12	-5.4752	1.96184e-93	5.31584e-91	-5.4752	5.59401e-97	1.45962e-94	-5.4752	6.91023e-90	1.9473e-87	-5.4752	6.31761e-71	1.7803e-68	-5.4752	1.72992e-74	4.68743e-72	-5.4752	4.09794e-72	1.03107e-69	-5.4752	1.88602e-226	5.2106e-224
ENSG00000259371	RP11-468E2.6	-2.29249	8.97361e-51	8.11541e-50	-2.29249	9.5252e-53	1.07197e-51	-2.29249	8.4871e-49	7.66559e-48	-2.29249	3.20834e-38	3.05856e-37	-2.29249	3.28445e-40	2.90144e-39	-2.29249	6.95958e-39	5.3909e-38	-2.29249	1.14541e-124	1.6368e-123
ENSG00000259375	RP11-815J21.2	-4.81073	2.0753e-69	6.89982e-68	-4.81073	4.50794e-72	1.75549e-70	-4.81073	9.59441e-67	3.73614e-65	-4.81073	1.73094e-52	7.11311e-51	-4.81073	3.61525e-55	1.39232e-53	-4.81073	2.21023e-53	7.04839e-52	-4.81073	3.18064e-169	1.42435e-167
ENSG00000259399	TGIF2-C20orf24	-4.75342	1.28562e-52	1.31074e-51	-4.75342	1.16539e-54	1.48735e-53	-4.75342	1.42389e-50	1.45803e-49	-4.75144	1.29728e-39	1.40822e-38	-4.75342	1.09302e-41	1.10717e-40	-4.75342	2.57379e-40	2.24499e-39	-4.75342	4.34356e-129	7.01039e-128
ENSG00000259431	THTPA	-3.06348	1.12363e-56	1.47962e-55	-2.95011	1.14944e-54	1.47099e-53	-3.15147	3.6212e-56	5.49222e-55	-2.9669	1.79339e-40	2.1181e-39	-3.12615	3.01999e-45	4.23399e-44	-2.88146	1.2737e-43	1.46982e-42	-3.38132	1.69694e-109	1.66387e-108
ENSG00000259522	RP11-468E2.2	-2.64836	1.18046e-66	3.16212e-65	-2.65674	2.30173e-69	7.59516e-68	-2.65206	4.17942e-64	1.23975e-62	-2.64856	2.36366e-50	7.67373e-49	-2.64751	6.37662e-53	1.95319e-51	-2.64894	3.25148e-51	8.09424e-50	-2.65774	5.00987e-163	1.86251e-161
ENSG00000259544	RP11-158M2.2	-2.80879	1.58597e-56	2.0768e-55	-2.76655	2.10502e-57	3.25932e-56	-2.20274	2.3588e-35	9.58071e-35	-2.29391	4.07105e-28	1.75524e-27	-2.15053	1.63794e-27	5.81324e-27	-2.4682	1.48424e-34	8.28233e-34	-2.80576	1.34445e-135	2.54273e-134
ENSG00000259627	RP11-244F12.2	-3.06973	8.61552e-51	7.79657e-50	-3.06973	9.13125e-53	1.02927e-51	-3.06973	8.16078e-49	7.38032e-48	-3.06973	3.11006e-38	2.97291e-37	-3.06973	3.179e-40	2.81358e-39	-3.06973	6.74297e-39	5.22598e-38	-3.06973	1.03881e-124	1.48597e-123
ENSG00000259661	AC068831.15	-3.09407	2.85927e-40	1.40668e-39	-3.09407	7.50474e-42	4.33546e-41	-3.09407	1.09325e-38	5.33746e-38	-3.09407	3.27073e-30	1.63594e-29	-3.09407	8.30858e-32	3.89966e-31	-3.09407	9.60632e-31	4.11783e-30	-3.09407	2.15686e-99	1.68366e-98
ENSG00000259687	LINC01220	-2.66863	5.80669e-34	2.06868e-33	-2.31263	3.08229e-30	9.72445e-30	-2.32888	1.28625e-25	3.285e-25	-2.3413	4.41388e-21	1.23445e-20	-2.37711	2.12799e-22	5.70785e-22	-2.30236	6.98591e-22	1.79358e-21	-2.14406	2.21792e-53	6.38548e-53
ENSG00000259753	ITGB3	-2.40666	2.13598e-46	1.47674e-45	-2.40666	3.30154e-48	2.83478e-47	-2.40666	1.38715e-44	9.46945e-44	-2.40666	7.03924e-35	5.00418e-34	-2.40666	1.05066e-36	7.01268e-36	-2.40666	1.73152e-35	1.02638e-34	-2.40666	3.71387e-114	4.09136e-113
ENSG00000259784	ATP6C	-3.11067	3.73278e-60	6.1731e-59	-3.11067	1.77904e-62	3.82114e-61	-3.11067	7.86432e-58	1.36463e-56	-3.11067	2.13983e-45	4.09093e-44	-3.11067	9.81717e-48	1.73121e-46	-3.11067	3.55194e-46	5.31283e-45	-3.11067	3.97609e-147	1.02232e-145
ENSG00000259813	RP5-1142A6.5	-3.5516	7.14686e-55	8.41264e-54	-3.55486	5.42876e-57	8.18963e-56	-3.56906	3.49424e-53	4.32635e-52	-3.55609	3.74542e-41	4.7415e-40	-3.56906	7.32669e-44	8.96899e-43	-3.55099	7.87333e-42	7.83441e-41	-3.56763	2.78398e-135	5.24415e-134
ENSG00000259827	RP11-343H19.2	-2.76114	9.00156e-43	5.05306e-42	-2.76114	1.90216e-44	1.28421e-43	-2.76114	4.27541e-41	2.39811e-40	-2.76114	4.0774e-32	2.32782e-31	-2.76114	8.3306e-34	4.50934e-33	-2.76114	1.11366e-32	5.42959e-32	-2.76114	1.97905e-105	1.77047e-104
ENSG00000259884	RP11-1100L3.8	-9.27538	4.43151e-72	1.88072e-70	-9.24484	2.15382e-72	8.79634e-71	-9.32603	8.96873e-71	4.84174e-69	-9.29778	1.27448e-55	7.0025e-54	-9.31298	1.20599e-58	6.61183e-57	-9.34782	2.61042e-57	1.35224e-55	-9.24054	2.5919e-164	1.02011e-162
ENSG00000259945	CTD-2012K14.3	-2.36253	5.43674e-56	6.83962e-55	-2.36253	3.69434e-58	5.99001e-57	-2.36253	8.03325e-54	1.03748e-52	-2.36253	3.28908e-42	4.56583e-41	-2.36253	2.15299e-44	2.75528e-43	-2.36253	6.14645e-43	6.69787e-42	-2.36253	3.609e-137	7.08228e-136
ENSG00000260007	RP11-315D16.2	-2.84807	1.16644e-64	2.62124e-63	-2.84807	3.79076e-67	1.09227e-65	-2.84807	3.60422e-62	8.89377e-61	-2.84807	7.57251e-49	2.12121e-47	-2.84807	2.36748e-51	5.9996e-50	-2.84807	1.10611e-49	2.35425e-48	-2.84807	6.87514e-158	2.26863e-156
ENSG00000260170	RP11-96O20.4	-5.85709	7.41593e-87	1.06623e-84	-5.85761	3.61428e-90	4.75936e-88	-5.85761	1.47293e-83	2.18458e-81	-5.85761	6.99377e-66	1.0159e-63	-5.85761	3.33481e-69	4.79465e-67	-5.85761	5.45785e-67	7.76779e-65	-5.85761	8.18633e-211	1.22708e-208
ENSG00000260238	PMF1-BGLAP	-3.66587	5.16848e-83	5.31561e-81	-3.66873	2.82132e-86	2.81932e-84	-3.66017	2.44127e-79	2.52923e-77	-3.66482	1.09011e-62	1.19067e-60	-3.65745	1.25011e-65	1.24922e-63	-3.65887	1.0578e-63	1.05705e-61	-3.6684	1.24446e-201	1.38066e-199
ENSG00000260246	AC000032.2	-3.69978	8.03747e-43	4.52088e-42	-3.63781	8.038e-43	4.90921e-42	-3.69999	8.99366e-41	4.94809e-40	-3.69822	8.86008e-32	4.94214e-31	-3.624	5.20439e-32	2.48155e-31	-3.68867	1.46778e-32	7.08741e-32	-3.6765	2.12777e-99	1.66188e-98
ENSG00000260269	CTD-2323K18.1	-2.21826	1.53185e-52	1.54722e-51	-2.42581	1.93448e-58	3.1842e-57	-2.33432	4.71244e-48	4.06603e-47	-2.41175	1.15809e-37	1.0541e-36	-2.24165	7.68801e-37	5.18545e-36	-2.42317	1.43459e-41	1.39019e-40	-2.33402	1.0261e-106	9.46184e-106
ENSG00000260272	RP11-20I23.1	-4.56306	1.14265e-92	2.87498e-90	-4.56312	3.46442e-96	8.1356e-94	-4.56336	3.72563e-89	9.72112e-87	-4.56336	2.41989e-70	6.50153e-68	-4.56336	7.06497e-74	1.7776e-71	-4.56336	1.60357e-71	3.70399e-69	-4.56275	1.44516e-224	3.63614e-222
ENSG00000260304	RP11-388M20.6	-3.61585	4.58275e-64	9.82814e-63	-3.61585	1.5664e-66	4.32756e-65	-3.61585	1.34634e-61	3.15461e-60	-3.61585	2.16078e-48	5.79911e-47	-3.61585	7.10563e-51	1.69119e-49	-3.61585	3.20985e-49	6.4334e-48	-3.61585	1.80385e-156	5.71152e-155
ENSG00000260314	MRC1	-5.5989	6.52483e-59	9.91747e-58	-5.11263	6.8661e-48	5.77008e-47	-4.20478	2.80411e-36	1.19293e-35	-4.33391	1.44248e-29	6.88735e-29	-4.30745	9.77258e-34	5.26158e-33	-4.37356	1.5471e-34	8.6151e-34	-5.52046	2.02411e-136	3.92834e-135
ENSG00000260335	RP11-345J4.6	-2.37366	1.98844e-41	1.03194e-40	-2.38013	8.49432e-43	5.18341e-42	-2.38915	6.35757e-38	2.9482e-37	-2.35352	9.97428e-29	4.4952e-28	-2.2648	2.00694e-27	7.09604e-27	-2.40057	7.04078e-31	3.04495e-30	-2.41194	9.74963e-98	7.34218e-97
ENSG00000260342	RP11-1035H13.3	-7.30276	2.93281e-106	5.90333e-103	-7.30276	2.83532e-110	5.70709e-107	-7.30276	3.04694e-102	7.15524e-99	-7.30276	8.92319e-81	2.09546e-77	-7.30276	8.28233e-85	1.94497e-81	-7.30276	4.03567e-82	9.4771e-79	-7.30276	5.74068e-257	1.15552e-253
ENSG00000260345	AC009052.12	-3.1708	1.21898e-68	3.83381e-67	-3.1708	2.82616e-71	1.05346e-69	-3.1708	5.27992e-66	1.91737e-64	-3.1708	6.72729e-52	2.61844e-50	-3.1708	1.4998e-54	5.50317e-53	-3.1708	8.77894e-53	2.6832e-51	-3.1708	2.17141e-167	9.10569e-166
ENSG00000260371	RP11-343C2.9	-2.55579	3.18648e-41	1.64039e-40	-2.55579	7.69993e-43	4.70477e-42	-2.55579	1.32342e-39	6.79058e-39	-2.55579	6.16081e-31	3.22339e-30	-2.55579	1.44027e-32	7.15563e-32	-2.55579	1.76003e-31	7.8952e-31	-2.55579	1.07851e-101	8.90229e-101
ENSG00000260441	RP11-96D1.7	-3.5749	1.89112e-52	1.89921e-51	-4.11734	9.99739e-64	2.30923e-62	-3.89529	4.28972e-52	4.90204e-51	-3.96487	5.45867e-41	6.75858e-40	-3.91204	1.57063e-44	2.06054e-43	-4.02271	5.45998e-44	6.56969e-43	-3.92022	1.13721e-123	1.58489e-122
ENSG00000260465	RP11-63M22.2	-2.41745	6.44579e-62	1.19817e-60	-2.41745	2.64436e-64	6.3909e-63	-2.41745	1.57771e-59	3.10041e-58	-2.41745	9.55749e-47	2.12741e-45	-2.41745	3.77336e-49	7.6609e-48	-2.41745	1.50899e-47	2.54022e-46	-2.41745	2.43789e-151	6.9959e-150
ENSG00000260537	RP11-529K1.3	-4.57067	2.66709e-87	3.87415e-85	-4.57067	1.27616e-90	1.76286e-88	-4.57067	5.59821e-84	8.39136e-82	-4.57067	3.23509e-66	4.79815e-64	-4.57067	1.48679e-69	2.18217e-67	-4.57067	2.49381e-67	3.58549e-65	-4.57067	7.49535e-212	1.17344e-209
ENSG00000260669	AL136419.6	-4.46314	7.29112e-93	1.90244e-90	-4.5503	1.49002e-98	4.564e-96	-4.47271	2.65283e-87	5.66339e-85	-4.42336	6.21934e-66	9.12818e-64	-4.42681	1.24182e-70	2.03457e-68	-4.46828	4.32174e-70	8.4574e-68	-4.52327	6.47266e-211	9.91302e-209
ENSG00000260682	7SK	-2.23897	7.5534e-36	2.96125e-35	-2.23897	2.91485e-37	1.30839e-36	-2.23897	1.9639e-34	7.57587e-34	-2.23897	7.47281e-27	2.96013e-26	-2.23897	2.79686e-28	1.03978e-27	-2.23897	2.49761e-27	8.71719e-27	-2.23897	1.09149e-88	6.67784e-88
ENSG00000260708	CTA-29F11.1	-2.26209	2.64926e-28	7.2651e-28	-3.01202	2.79054e-38	1.31898e-37	-3.81313	1.16084e-44	7.97624e-44	-3.68477	3.54048e-33	2.19373e-32	-3.85367	1.00067e-37	7.19727e-37	-3.4775	3.22086e-33	1.63657e-32	-2.70239	1.03156e-55	3.11426e-55
ENSG00000260729	RP11-106M3.2	-3.0372	2.23687e-64	4.92462e-63	-3.07066	5.66627e-64	1.33063e-62	-3.00087	7.00389e-59	1.33538e-57	-2.96704	1.90749e-44	3.34701e-43	-2.95113	3.58905e-47	6.01304e-46	-2.97426	2.68968e-46	4.06191e-45	-3.00073	1.36898e-140	2.927e-139
ENSG00000260747	RP11-421N8.1	-3.21108	2.63926e-66	6.86111e-65	-2.93631	2.65096e-56	3.80367e-55	-2.64278	2.78569e-40	1.49071e-39	-2.63977	3.92828e-36	3.10429e-35	-2.67334	2.07929e-33	1.09073e-32	-2.89305	6.4371e-41	5.90871e-40	-3.47091	7.80865e-161	2.73691e-159
ENSG00000260755	RP11-403P17.3	-3.53323	1.7499e-51	1.64155e-50	-3.53323	1.74789e-53	2.08004e-52	-3.53323	1.75882e-49	1.66656e-48	-3.53323	9.20068e-39	9.23345e-38	-3.53323	8.86171e-41	8.24168e-40	-3.53323	1.95565e-39	1.57909e-38	-3.53323	2.27099e-126	3.41862e-125
ENSG00000260836	RP11-152F13.10	-2.5016	7.71177e-60	1.24324e-58	-2.5016	3.77532e-62	7.92761e-61	-2.5016	1.58174e-57	2.68192e-56	-2.5016	3.7297e-45	6.96047e-44	-2.5016	1.75772e-47	3.0166e-46	-2.5016	6.24671e-46	9.16835e-45	-2.5016	2.25279e-146	5.62798e-145
ENSG00000260861	RP4-576H24.4	-2.8667	9.90598e-30	2.90057e-29	-2.86157	7.4943e-31	2.4297e-30	-2.83604	3.44542e-28	9.90531e-28	-2.84095	5.45284e-22	1.60465e-21	-2.85116	2.83211e-23	7.92541e-23	-2.84764	1.86405e-22	4.94716e-22	-2.86193	1.29001e-73	5.73023e-73
ENSG00000260894	CTD-2012K14.4	-3.68627	4.75605e-75	2.53836e-73	-3.68627	6.40835e-78	3.67047e-76	-3.68627	3.54486e-72	2.10747e-70	-3.68627	8.17679e-57	5.03105e-55	-3.68627	1.05888e-59	6.34875e-58	-3.68627	8.90297e-58	4.86213e-56	-3.68627	1.13659e-182	7.1814e-181
ENSG00000260899	RP11-2C24.4	-3.49322	1.67724e-65	4.03283e-64	-3.5138	1.74711e-68	5.37485e-67	-3.50281	9.66292e-63	2.4845e-61	-3.50259	1.81743e-49	5.39108e-48	-3.50756	3.25121e-52	8.94718e-51	-3.51525	1.06684e-50	2.49283e-49	-3.51279	1.65763e-160	5.7527e-159
ENSG00000260914	RP11-343C2.11	-3.52282	2.14592e-41	1.11244e-40	-3.52282	5.10888e-43	3.1572e-42	-3.52282	9.04618e-40	4.68089e-39	-3.52282	4.56005e-31	2.40731e-30	-3.52282	1.05022e-32	5.26045e-32	-3.52282	1.29624e-31	5.85575e-31	-3.52282	4.15372e-102	3.46103e-101
ENSG00000260934	CTA-363E6.7	-2.66245	1.21786e-53	1.31895e-52	-2.66245	1.01146e-55	1.39174e-54	-2.66245	1.47222e-51	1.59812e-50	-2.66245	2.0639e-40	2.42944e-39	-2.66245	1.65205e-42	1.80165e-41	-2.66245	4.12446e-41	3.85624e-40	-2.66245	1.53205e-131	2.6293e-130
ENSG00000261064	RP11-1000B6.3	-3.17102	4.631e-50	4.02038e-49	-3.00922	1.21082e-49	1.13434e-48	-2.36175	3.32467e-33	1.19991e-32	-2.38822	1.62436e-26	6.30677e-26	-2.2015	3.29815e-26	1.08831e-25	-2.42218	1.43033e-30	6.05387e-30	-2.55496	3.86262e-70	1.5908e-69
ENSG00000261067	RP11-264B17.3	-3.12738	2.37764e-72	1.0308e-70	-3.25781	4.51666e-78	2.61892e-76	-3.2232	1.19354e-70	6.29847e-69	-3.21783	1.27725e-55	7.0025e-54	-3.23369	1.40202e-59	8.26548e-58	-3.21882	4.81395e-57	2.43113e-55	-3.27469	1.8423e-182	1.15369e-180
ENSG00000261147	RP11-697E2.6	-3.38189	3.05504e-80	2.47388e-78	-3.42286	9.5961e-85	8.39807e-83	-3.39377	3.9402e-76	3.17242e-74	-3.3764	2.70466e-59	2.14093e-57	-3.38978	3.69998e-64	3.23806e-62	-3.40011	8.97952e-62	7.53104e-60	-3.43031	3.86973e-196	3.47289e-194
ENSG00000261218	RP11-960L18.1	-2.72399	3.03614e-42	1.64789e-41	-2.648	1.99727e-42	1.19636e-41	-2.64611	4.47668e-38	2.10185e-37	-2.63457	1.75486e-29	8.31686e-29	-2.67301	1.48838e-32	7.38423e-32	-2.68935	8.95727e-32	4.08308e-31	-2.60128	1.96887e-94	1.37674e-93
ENSG00000261317	RP11-566K11.5	-2.42559	1.50162e-37	6.37094e-37	-2.42559	4.99408e-39	2.45865e-38	-2.42559	4.5306e-36	1.90499e-35	-2.42559	3.8202e-28	1.65219e-27	-2.42559	1.23118e-29	5.01078e-29	-2.42559	1.21469e-28	4.58601e-28	-2.42559	8.19047e-93	5.53495e-92
ENSG00000261359	PYCARD-AS1	-3.66807	1.94508e-58	2.86676e-57	-3.68218	6.77126e-61	1.31054e-59	-3.65377	1.66975e-55	2.41796e-54	-3.64674	1.7223e-43	2.73047e-42	-3.67075	2.59556e-46	3.98816e-45	-3.67657	7.0248e-45	9.45362e-44	-3.68481	1.95723e-143	4.59622e-142
ENSG00000261408	TEN1-CDK3	-2.0947	1.21273e-55	1.49234e-54	-2.18691	2.77105e-58	4.52422e-57	-2.28129	1.999e-58	3.66266e-57	-2.23493	1.9411e-42	2.75707e-41	-2.24003	2.41431e-47	4.11337e-46	-2.23512	7.17088e-46	1.0492e-44	-2.18363	6.78392e-124	9.549e-123
ENSG00000261416	RP11-455F5.5	-3.03207	8.9776e-48	6.78618e-47	-2.81897	2.2618e-46	1.72824e-45	-3.09419	3.79265e-45	2.67523e-44	-2.90717	2.02746e-33	1.28218e-32	-3.01328	9.73321e-36	6.06282e-35	-2.82455	8.67528e-34	4.60048e-33	-3.17202	3.49346e-118	4.21068e-117
ENSG00000261460	RP11-106M3.3	-4.28593	3.41813e-73	1.5739e-71	-4.36527	1.24382e-77	6.98221e-76	-3.87321	2.08141e-60	4.38372e-59	-3.97736	2.18591e-49	6.42996e-48	-3.85197	3.29442e-51	8.18666e-50	-4.07891	2.6547e-51	6.67941e-50	-3.95655	1.01032e-146	2.56957e-145
ENSG00000261487	AC135048.13	-4.18741	3.93803e-58	5.71441e-57	-4.19434	1.82675e-60	3.4414e-59	-4.18303	1.07607e-55	1.58596e-54	-4.20122	5.92196e-44	9.8863e-43	-4.18392	4.98762e-46	7.48409e-45	-4.1881	1.73052e-44	2.20262e-43	-4.20018	1.61747e-142	3.69971e-141
ENSG00000261582	RP4-614O4.11	-3.42707	6.22734e-54	6.85494e-53	-3.9692	7.95823e-64	1.85341e-62	-4.17881	1.13681e-56	1.79569e-55	-3.90806	4.38964e-39	4.56795e-38	-4.07643	9.00245e-48	1.58953e-46	-3.75815	1.92483e-45	2.71636e-44	-3.91241	6.11629e-127	9.35706e-126
ENSG00000261611	ZNF23	-2.59516	1.08212e-41	5.71695e-41	-2.59516	2.51073e-43	1.58425e-42	-2.59516	4.68082e-40	2.47014e-39	-2.59516	2.70806e-31	1.45803e-30	-2.59516	6.07756e-33	3.09256e-32	-2.59516	7.63179e-32	3.49357e-31	-2.59516	7.96091e-103	6.76125e-102
ENSG00000261641	LA16c-390E6.5	-4.25653	1.62563e-64	3.61281e-63	-4.25653	5.34812e-67	1.52232e-65	-4.25653	4.96197e-62	1.20959e-60	-4.25653	9.76583e-49	2.71938e-47	-4.25653	3.09086e-51	7.708e-50	-4.25653	1.43233e-49	3.01217e-48	-4.25653	1.5187e-157	4.96485e-156
ENSG00000261684	RP11-265N6.1	-6.2224	6.90352e-94	1.98511e-91	-6.2224	1.89456e-97	5.13354e-95	-6.2224	2.5265e-90	7.41633e-88	-6.2224	2.83294e-71	8.67741e-69	-6.2224	7.46596e-75	2.10391e-72	-6.2224	1.81429e-72	4.82328e-70	-6.2224	1.57049e-227	4.61005e-225
ENSG00000261717	RP11-77K12.1	-3.27053	3.73763e-82	3.46468e-80	-3.27053	2.76206e-85	2.54362e-83	-3.27053	5.0796e-79	5.14904e-77	-3.27053	2.88818e-62	2.9704e-60	-3.27053	2.05043e-65	2.00629e-63	-3.27053	2.5737e-63	2.43379e-61	-3.27053	1.34715e-199	1.39568e-197
ENSG00000261759	RP11-626G11.3	-2.13926	2.00905e-51	1.87718e-50	-2.13926	2.01707e-53	2.38628e-52	-2.13926	2.00895e-49	1.89465e-48	-2.13926	1.02247e-38	1.02102e-37	-2.13926	9.89889e-41	9.16395e-40	-2.13926	2.17706e-39	1.74586e-38	-2.13926	3.16259e-126	4.73549e-125
ENSG00000261771	DYX1C1-CCPG1	-4.06886	6.26431e-58	8.95173e-57	-4.06886	3.60825e-60	6.64578e-59	-4.06886	1.09198e-55	1.60774e-54	-4.06886	1.08062e-43	1.7501e-42	-4.06886	5.99389e-46	8.89926e-45	-4.06886	1.91091e-44	2.41694e-43	-4.06886	8.30281e-142	1.85105e-140
ENSG00000261779	RP11-69H7.3	-2.14756	1.00559e-42	5.62476e-42	-2.14756	2.13381e-44	1.43716e-43	-2.14756	4.75635e-41	2.65835e-40	-2.14756	4.43627e-32	2.52656e-31	-2.14756	9.10178e-34	4.9098e-33	-2.14756	1.21337e-32	5.89938e-32	-2.14756	2.58476e-105	2.30211e-104
ENSG00000261796	ISY1-RAB43	-2.45921	2.44525e-68	7.55562e-67	-2.45921	5.8164e-71	2.13419e-69	-2.45921	1.03234e-65	3.64552e-64	-2.45921	1.14718e-51	4.33507e-50	-2.45921	2.62403e-54	9.3839e-53	-2.45921	1.5099e-52	4.4883e-51	-2.45921	1.14288e-166	4.76426e-165
ENSG00000261884	CTC-479C5.12	-2.82322	3.65602e-61	6.42311e-60	-3.25405	5.36174e-73	2.25513e-71	-3.20634	6.88598e-66	2.46252e-64	-3.06277	1.64189e-45	3.18653e-44	-3.15082	3.027e-52	8.42893e-51	-3.12511	1.70532e-50	3.88173e-49	-3.08509	5.55938e-142	1.25131e-140
ENSG00000261898	RP11-314A20.5	-3.47295	2.80775e-61	4.98251e-60	-3.46614	2.31365e-63	5.25795e-62	-3.45143	6.99551e-58	1.2214e-56	-3.44624	4.37234e-45	8.07421e-44	-3.44351	3.14907e-47	5.31382e-46	-3.44272	4.30604e-46	6.4e-45	-3.48057	8.86958e-150	2.44564e-148
ENSG00000261997	RP11-212I21.4	-2.98065	2.06759e-49	1.72483e-48	-2.87859	2.69823e-49	2.4639e-48	-2.39846	1.12984e-37	5.1872e-37	-2.36032	6.92066e-26	2.59341e-25	-2.19171	6.83848e-24	1.9875e-23	-2.58554	5.594e-32	2.58002e-31	-2.91645	1.10352e-117	1.31433e-116
ENSG00000262049	RP13-1032I1.7	-2.28176	2.86308e-47	2.09454e-46	-3.00235	3.73848e-62	7.86197e-61	-3.11196	6.57263e-58	1.15185e-56	-2.87529	2.97864e-41	3.80154e-40	-3.07199	1.01263e-50	2.38197e-49	-2.91289	4.19651e-49	8.33975e-48	-2.76808	4.91582e-92	3.27025e-91
ENSG00000262160	RP11-96D1.11	-2.05685	1.75834e-56	2.29186e-55	-2.05685	1.14588e-58	1.9198e-57	-2.05685	2.70907e-54	3.60442e-53	-2.05685	1.38671e-42	2.02264e-41	-2.05685	8.70463e-45	1.16254e-43	-2.05685	2.55544e-43	2.8713e-42	-2.05685	2.42161e-138	4.88832e-137
ENSG00000262211	CTD-2031P19.5	-5.25596	4.118e-58	5.95715e-57	-5.25596	2.33544e-60	4.37585e-59	-5.25596	7.29075e-56	1.08705e-54	-5.25596	7.8383e-44	1.29931e-42	-5.25596	4.2806e-46	6.48534e-45	-5.25596	1.37892e-44	1.78411e-43	-5.25596	3.04414e-142	6.92923e-141
ENSG00000262246	CORO7	-3.84733	2.00852e-65	4.79662e-64	-3.51498	2.45393e-60	4.57958e-59	-3.82142	1.89969e-67	8.06264e-66	-3.6553	5.94267e-52	2.34496e-50	-3.74778	7.99326e-57	3.68056e-55	-3.65579	4.17008e-55	1.65511e-53	-3.25992	3.48189e-122	4.67682e-121
ENSG00000262302	RP1-4G17.5	-3.77513	5.74256e-90	9.98922e-88	-3.77513	2.19384e-93	3.6799e-91	-3.77513	1.5097e-86	2.7989e-84	-3.77513	2.89923e-68	5.1709e-66	-3.77513	1.06374e-71	1.89724e-69	-3.77513	2.07327e-69	3.51957e-67	-3.77513	3.35829e-218	6.22609e-216
ENSG00000262412	RP11-85G18.6	-2.36979	8.13128e-43	4.57181e-42	-2.43034	1.57257e-45	1.13804e-44	-2.24135	9.58485e-36	3.96275e-35	-2.25033	3.29937e-29	1.53224e-28	-2.26885	2.33498e-31	1.06287e-30	-2.32387	1.57659e-31	7.0881e-31	-2.46313	2.18498e-107	2.04832e-106
ENSG00000262413	RP11-498C9.3	-4.92945	1.39634e-90	2.73256e-88	-4.92945	5.065e-94	9.51545e-92	-4.92945	3.86621e-87	8.13059e-85	-4.92945	9.78931e-69	1.99901e-66	-4.92945	3.41028e-72	6.96388e-70	-4.92945	6.8805e-70	1.32803e-67	-4.92945	1.15969e-219	2.36812e-217
ENSG00000262429	RP5-1050D4.3	-2.66627	3.13543e-61	5.52919e-60	-2.66627	1.36367e-63	3.13444e-62	-2.66627	7.23894e-59	1.37833e-57	-2.66627	3.21041e-46	6.75143e-45	-2.66627	1.34387e-48	2.58323e-47	-2.66627	5.16862e-47	8.18268e-46	-2.66627	1.06793e-149	2.9161e-148
ENSG00000262477	AC021224.1	-2.87517	1.07707e-71	4.38609e-70	-2.88171	1.18525e-74	5.4398e-73	-2.79844	2.51052e-64	7.67314e-63	-2.80289	3.17558e-50	1.01691e-48	-2.76672	4.99533e-51	1.21143e-49	-2.80868	1.25136e-52	3.77552e-51	-2.86427	1.2778e-169	5.78914e-168
ENSG00000262526	CTD-2545G14.7	-9.01089	9.27532e-106	1.4521e-102	-9.01089	9.35308e-110	1.46428e-106	-9.01089	9.23848e-102	1.62713e-98	-9.01089	2.16074e-80	4.34927e-77	-9.01089	2.09193e-84	3.68441e-81	-9.01089	9.91067e-82	1.55157e-78	-9.01089	8.88298e-256	1.39068e-252
ENSG00000262533	RP11-667K14.4	-5.21722	1.8563e-82	1.76724e-80	-5.21722	1.337e-85	1.24757e-83	-5.21722	2.58841e-79	2.6621e-77	-5.21722	1.68782e-62	1.77473e-60	-5.21722	1.16786e-65	1.17537e-63	-5.21722	1.49121e-63	1.44905e-61	-5.21722	2.54414e-200	2.67514e-198
ENSG00000262554	LA16c-360H6.2	-3.23178	8.05545e-71	3.05933e-69	-3.23178	1.55262e-73	6.7729e-72	-3.23178	4.19712e-68	1.86553e-66	-3.23178	1.43313e-53	6.57748e-52	-3.23178	2.65564e-56	1.15488e-54	-3.23178	1.7584e-54	6.44298e-53	-3.23178	1.37168e-172	6.75768e-171
ENSG00000262621	LA16c-306E5.2	-3.30825	5.53099e-74	2.76354e-72	-3.3188	4.29023e-77	2.30723e-75	-3.31585	3.69701e-71	2.0671e-69	-3.32483	2.9599e-56	1.73771e-54	-3.31712	6.0857e-59	3.41624e-57	-3.33002	3.11942e-57	1.59828e-55	-3.31722	1.11844e-179	6.59363e-178
ENSG00000262633	RP11-156P1.2	-4.04883	1.02304e-82	1.02232e-80	-4.04883	7.20915e-86	7.05395e-84	-4.04883	1.45806e-79	1.58031e-77	-4.04883	1.06835e-62	1.18529e-60	-4.04883	7.23236e-66	7.54844e-64	-4.04883	9.3705e-64	9.49859e-62	-4.04883	6.15623e-201	6.72413e-199
ENSG00000262660	SLC25A10	-2.72602	5.68851e-62	1.06301e-60	-2.72602	2.32294e-64	5.62375e-63	-2.72602	1.39879e-59	2.76036e-58	-2.72602	8.68496e-47	1.93932e-45	-2.72602	3.41307e-49	6.99219e-48	-2.72602	1.36912e-47	2.31306e-46	-2.72602	1.80858e-151	5.2006e-150
ENSG00000262664	OVCA2	-4.62592	2.26833e-76	1.36585e-74	-4.62592	2.73309e-79	1.71152e-77	-4.62592	1.89067e-73	1.23331e-71	-4.62592	7.91889e-58	5.33862e-56	-4.62592	9.16929e-61	5.98126e-59	-4.62592	8.30651e-59	5.11086e-57	-4.62592	8.05712e-186	5.56494e-184
ENSG00000262730	RP11-1099M24.7	-2.07689	1.30506e-55	1.59898e-54	-2.07689	9.16053e-58	1.45351e-56	-2.07689	1.86676e-53	2.34218e-52	-2.07689	6.4271e-42	8.64927e-41	-2.07689	4.34617e-44	5.41925e-43	-2.07689	1.21415e-42	1.28627e-41	-2.07689	2.93551e-136	5.63505e-135
ENSG00000262791	RP11-961A15.1	-2.8356	5.64603e-58	8.1259e-57	-2.8356	3.23964e-60	5.99035e-59	-2.8356	9.87998e-56	1.46536e-54	-2.8356	9.97995e-44	1.62752e-42	-2.8356	5.51433e-46	8.23933e-45	-2.8356	1.76254e-44	2.24135e-43	-2.8356	6.47558e-142	1.4552e-140
ENSG00000262831	RP11-498C9.2	-5.49058	2.63251e-70	9.53523e-69	-5.49058	5.29989e-73	2.23579e-71	-5.49058	1.31313e-67	5.64086e-66	-5.49058	3.55363e-53	1.56961e-51	-5.49058	6.87852e-56	2.88448e-54	-5.49058	4.42401e-54	1.53912e-52	-5.49058	2.31066e-171	1.11117e-169
ENSG00000262995	CTD-2194A8.2	-2.50047	7.99722e-50	6.84158e-49	-2.50133	9.83988e-52	1.04087e-50	-2.43484	3.49704e-44	2.32421e-43	-2.47849	6.21382e-37	5.287e-36	-2.41403	3.66554e-37	2.5392e-36	-2.4984	4.80477e-38	3.48247e-37	-2.48907	1.52949e-120	1.9753e-119
[truncated: 436 more rows]

## Sheet: Table S3
Table S3. Core microglial signature genes and their average RPKM of control samples in the AMP-AD datasets and bulk microglia from surgical tissue in this study. Includes unique genes only (n=1971).
[truncated: 1,972 more rows]

[truncated: 6 more sheets: Table S4, Table S5, Table S6, Table S7, Table S8, Table S9]
